# Supplementary material for: Enantioselective organocatalytic syntheses of α-selenated α- and β-amino acid derivatives
Source: Org Biomol Chem. 2022 Jan 3;20(4):824–30. doi: 10.1039/d1ob02235k (PMC8790592; doi:10.1039/d1ob02235k)

# SUPPORTING INFORMATION

---

## Enantioselective organocatalytic syntheses of $\alpha$ -selenated $\alpha$ - and $\beta$ -amino acid derivatives

Victoria Haider<sup>a</sup>, Paul Zebrowski<sup>a</sup>, Jessica Michalke<sup>b</sup>, Uwe Monkowius<sup>c</sup> and Mario Waser<sup>\*a</sup>

*a) Institute of Organic Chemistry, Johannes Kepler University Linz, Altenbergerstraße 69, 4040 Linz, Austria.*

*Fax: +43 732 2468 5411; Tel: +43 732 2468 5402;*

*E-mail: mario.waser@jku.at*

*b) Institute of Catalysis, Johannes Kepler University Linz, Altenbergerstraße 69, 4040 Linz, Austria.*

*c) School of Education, Chemistry, Johannes Kepler University Linz, Altenbergerstraße 69, 4040 Linz, Austria.*

## **Table of Contents**

|    |                                                                                                                          |    |
|----|--------------------------------------------------------------------------------------------------------------------------|----|
| 1. | General Information .....                                                                                                | 1  |
| 2. | Synthesis of $\alpha$ -Selenated Azlactones 3 .....                                                                      | 2  |
|    | 2.1 General Racemic Procedure .....                                                                                      | 2  |
|    | 2.2 General Enantioselective Procedure.....                                                                              | 2  |
| 3. | Characterization Data of $\alpha$ -Selenated Azlactones 3 .....                                                          | 3  |
|    | 4-Benzyl-2-phenyl-4-(phenylselanyl)oxazol-5(4 <i>H</i> )-one (3a): .....                                                 | 3  |
|    | 4-Methyl-2-phenyl-4-(phenylselanyl)oxazol-5(4 <i>H</i> )-one (3c): .....                                                 | 3  |
|    | 4-Isopropyl- 2-phenyl-4-(phenylselanyl)oxazol-5(4 <i>H</i> )-one (3d): .....                                             | 4  |
|    | 4-Isobutyl- 2-phenyl-4-(phenylselanyl)oxazol-5(4 <i>H</i> )-one (3e): .....                                              | 4  |
|    | 4-(Cyclohexylmethyl)-2-phenyl-4-(phenylselanyl)oxazol-5(4 <i>H</i> )-one (3f): .....                                     | 5  |
|    | 4-(2-(Methylthio)ethyl)-2-phenyl-4-(phenylselanyl)oxazol-5(4 <i>H</i> )-one (3g): .....                                  | 5  |
|    | 4-(4-Chlorobenzyl)- 2-phenyl-4-(phenylselanyl)oxazol-5(4 <i>H</i> )-one (3h): .....                                      | 6  |
|    | 4-(4-Nitrobenzyl)- 2-phenyl-4-(phenylselanyl)oxazol-5(4 <i>H</i> )-one (3i): .....                                       | 6  |
|    | 4-Benzyl-4-(phenylselanyl)-2-(4-(trifluoromethyl)phenyl)oxazol-5(4 <i>H</i> )-one (3j): .....                            | 7  |
|    | 4-Benzyl-2-(4-nitrophenyl)-4-(phenylselanyl)oxazol-5(4 <i>H</i> )-one (3k): .....                                        | 7  |
|    | 4-Benzyl-2-(4-methoxyphenyl)-4-(phenylselanyl)oxazol-5(4 <i>H</i> )-one (3l): .....                                      | 8  |
|    | 4-Benzyl-2-(4-chlorophenyl)-4-(phenylselanyl)oxazol-5(4 <i>H</i> )-one (3m): .....                                       | 8  |
|    | 4-Benzyl-2-(naphthalen-2-yl)-4-(phenylselanyl)oxazol-5(4 <i>H</i> )-one (3n): .....                                      | 9  |
|    | 4-Benzyl-2-ethyl-4-(phenylselanyl)oxazol-5(4 <i>H</i> )-one (3o): .....                                                  | 9  |
|    | 4-Benzyl-2-cyclohexyl-4-(phenylselanyl)oxazol-5(4 <i>H</i> )-one (3p): .....                                             | 10 |
|    | 4-(4-Chlorobenzyl)-2-(4-methoxyphenyl)-4-(phenylselanyl)oxazol-5(4 <i>H</i> )-one (3q): .....                            | 10 |
|    | 2-(4-Methoxyphenyl)-4-(4-nitrobenzyl)-4-(phenylselanyl)oxazol-5(4 <i>H</i> )-one (3r): .....                             | 11 |
|    | 2-(4-Methoxyphenyl)-4-methyl-4-(phenylselanyl)oxazol-5(4 <i>H</i> )-one (3s): .....                                      | 11 |
|    | 4-Isobutyl-2-(4-methoxyphenyl)-4-(phenylselanyl)oxazol-5(4 <i>H</i> )-one (3t): .....                                    | 12 |
|    | 2-(4-Methoxyphenyl)-4-(2-(methylthio)ethyl)-4-(phenylselanyl)oxazol-5(4 <i>H</i> )-one (3u): .....                       | 12 |
|    | 4-Benzyl-2-phenyl-4-( <i>o</i> -tolylselanyl)oxazol-5(4 <i>H</i> )-one (3v): .....                                       | 13 |
|    | 4-Benzyl-2-phenyl-4-( <i>p</i> -tolylselanyl)oxazol-5(4 <i>H</i> )-one (3w): .....                                       | 13 |
|    | 4-Benzyl-4-(benzylselanyl)-2-phenyloxazol-5(4 <i>H</i> )-one (3x): .....                                                 | 14 |
|    | <i>tert</i> -Butyl- ((1 <i>S</i> )-1-(4-benzyl-5-oxo-4-(phenylselanyl)-4,5-dihydrooxazol-2-yl)ethyl)carbamate (8): ..... | 14 |
| 4. | Further Transformations of 4-Benzyl-2-phenyl-4-(phenylselanyl)oxazol-5(4 <i>H</i> )-one 3a                               | 15 |
|    | Methyl 2-benzamido-2-methoxy-3-phenylpropanoate (6): .....                                                               | 15 |
| 5. | Synthesis of $\alpha$ -Selenated $\alpha$ -Aryl-Isoxazolidin-5-ones 4 .....                                              | 16 |
|    | 5.1 General Racemic Procedure .....                                                                                      | 16 |
|    | 5.2 General Enantioselective Procedure.....                                                                              | 16 |
| 6. | Characterization Data of $\alpha$ -Selenated $\alpha$ -Aryl-Isoxazolidin-5-ones 4.....                                   | 17 |

|                                                                                                                     |     |
|---------------------------------------------------------------------------------------------------------------------|-----|
| <i>tert</i> -Butyl 5-oxo-4-phenyl-4-(phenylselanyl)isoxazolidine-2-carboxylate (4a):.....                           | 17  |
| <i>tert</i> -Butyl 4-(naphthalen-2-yl)-5-oxo-4-(phenylselanyl)isoxazolidine-2-carboxylate (4b): .....               | 17  |
| <i>tert</i> -Butyl 5-oxo-4-(phenylselanyl)-4-(thiophen-3-yl)isoxazolidine-2-carboxylate (4c): .....                 | 18  |
| <i>tert</i> -Butyl 4-(4-chlorophenyl)-5-oxo-4-(phenylselanyl)isoxazolidine-2-carboxylate (4d): .....                | 18  |
| <i>tert</i> -Butyl 4-(4-bromophenyl)-5-oxo-4-(phenylselanyl)isoxazolidine-2-carboxylate (4e): .....                 | 19  |
| <i>tert</i> -Butyl 4-(4-fluorophenyl)-5-oxo-4-(phenylselanyl)isoxazolidine-2-carboxylate (4f): .....                | 19  |
| <i>tert</i> -Butyl 4-(3,4-dichlorophenyl)-5-oxo-4-(phenylselanyl)isoxazolidine-2-carboxylate (4g): ...              | 20  |
| <i>tert</i> -Butyl 5-oxo-4-(phenylselanyl)-4-( <i>p</i> -tolyl)isoxazolidine-2-carboxylate (4i):.....               | 20  |
| <i>tert</i> -Butyl 5-oxo-4-phenyl-4-( <i>o</i> -tolylselanyl)isoxazolidine-2-carboxylate (4j):.....                 | 21  |
| <i>tert</i> -Butyl 5-oxo-4-phenyl-4-( <i>p</i> -tolylselanyl)isoxazolidine-2-carboxylate (4k):.....                 | 21  |
| <i>tert</i> -Butyl 4-(benzylselanyl)-5-oxo-4-phenylisoxazolidine-2-carboxylate (4l):.....                           | 22  |
| 7. Further Transformations of <i>N</i> -Boc 4,4-phenyl(phenylselanyl)isoxazolidin-5-one 4a .....                    | 23  |
| <i>tert</i> -Butyl (3-((4-chlorobenzyl)amino)-3-oxo-2-phenyl-2-(phenylselanyl)propyl)(hydroxy)carbamate (9a): ..... | 23  |
| <i>tert</i> -Butyl hydroxy(3-((4-methoxybenzyl)amino)-3-oxo-2-phenyl-2-(phenylselanyl)propyl)carbamate (9b): .....  | 23  |
| Methyl 3-(( <i>tert</i> -butoxycarbonyl)(hydroxy)amino)-2-phenyl-2-(phenylselanyl)propanoate (10):                  | 24  |
| <i>tert</i> -Butyl 5-oxo-4-phenylisoxazole-2(5 <i>H</i> )-carboxylate (11):.....                                    | 24  |
| 8. Single-Crystal Analysis.....                                                                                     | 25  |
| 9. NMR Spectra of Selenation Products.....                                                                          | 27  |
| 10. HPLC Traces of Racemic and Enantioenriched Selenation Products .....                                            | 69  |
| 11. HRMS Data .....                                                                                                 | 107 |

## 1. General Information

$^1\text{H}$ -,  $^{13}\text{C}$ - and  $^{19}\text{F}$ -NMR spectra were recorded on a Bruker Avance III 300 MHz spectrometer with a broad band observe probe and a sample changer for 16 samples, a Bruker Avance DRX 500 MHz spectrometer and on a Bruker Avance III 700 MHz spectrometer with an Ascend magnet and TCI cryoprobe, which are property of the Austro-Czech NMR-Research Center “RERI-uasb”. NMR spectra were referenced on the solvent peak and chemical shifts are given in ppm.

High resolution mass spectra were obtained using an Agilent 6520 Q-TOF mass spectrometer with an ESI source. Analyses were made in the positive ionization mode if not otherwise stated. Purine (exact mass for  $[M+\text{H}]^+ = 121.050873$ ) and 1,2,3,4,5,6-hexakis(2,2,3,3-tetrafluoropropoxy)-1,3,5,2,4,6-triazatriphosphinane (exact mass for  $[M+\text{H}]^+ = 922.009798$ ) were used for internal mass calibration.

HPLC was performed using a Thermo Scientific Dionex Ultimate 3000 or a Shimadzu Prominence system with diode array detector with a CHIRALPAK AD-H, OD-H or YMC CHIRAL ART Cellulose-SB (250  $\times$  4.6 mm, 5  $\mu\text{m}$ ) chiral stationary phase. Optical rotations were recorded on a Schmidt + Haensch Polarimeter Model UniPol L1000 at 589 nm.

All chemicals were purchased from commercial suppliers and used without further purification unless otherwise stated. Dry solvents were obtained from an MBraun-SPS-800 solvent purification system. All reactions were carried out under argon atmosphere and in absence of light, unless stated otherwise.

Azlactones<sup>1</sup> **1**,  $\alpha$ -Aryl-Isoxazolidin-5-ones<sup>2</sup> **2** and selenation reagents<sup>3</sup> **5** were prepared following established procedures.

---

<sup>1</sup> (a) C. Macovai, P. Vicennati, J. Quinton, M.-C. Nevers, H. Volland, C. Créminon and F. Taran, *Chem. Commun.* 2012, **48**, 4411–4413; (b) A. D. Melhado, M. Luparia and F. D. Toste, *J. Am. Chem. Soc.* 2007, **129**, 42, 12638–12639; (c) D. N. Le, J. Riedel, N. Kozlyuk, R. W. Martin and V. M. Dong, *Org. Lett.* 2017, **19**, 1, 114–117

<sup>2</sup> M. N. Oliveira, S. Arseniyadis and J. Cossy, *Chem. Eur. J.* 2018, **24**, 4810–4814.

<sup>3</sup> (a) X.-Y. Wang, Y.-F. Zhong, Z.-Y. Mo, S.-H. Wu, Y.-L. Xu, H.-T. Tang and Y.-M. Pan, *Adv. Synth. Catal.* 2021, **363**, 208–214; (b) T. Hori and K. B. Sharpless, *J. Org. Chem.* 1979, **44**, 4208–4210.

## 2. Synthesis of $\alpha$ -Selenated Azlactones 3

### 2.1 General Racemic Procedure

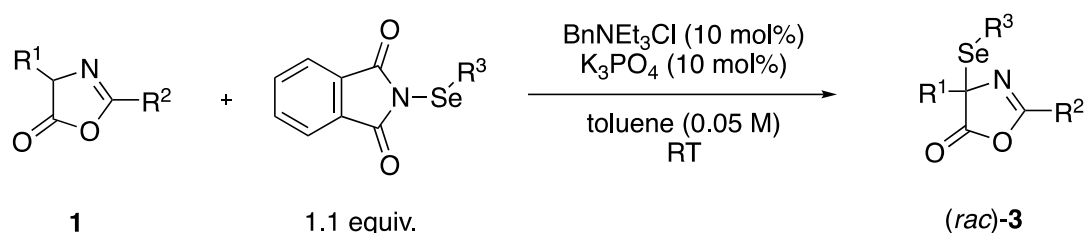

To a solution of azlactone (**1**, 1 equiv.), benzyltriethylammonium chloride (BTEAC, 10 mol%) and  $K_3PO_4$  (10 mol%) in toluene (0.05 M with respect to azlactone substrate **1**) under an atmosphere of argon was added the corresponding *N*-(Aryl-seleno)phthalimide (1.1 equiv.) at room temperature and under exclusion of light. The reaction mixture was stirred for 1 h under these conditions and the reaction was monitored by thin layer chromatography using heptanes:EtOAc (3.5:1) as mobile phase. After filtration through a pad of  $Na_2SO_4$  the crude product was subjected to silica gel column chromatography (eluent: heptanes:EtOAc) for purification.

### 2.2 General Enantioselective Procedure

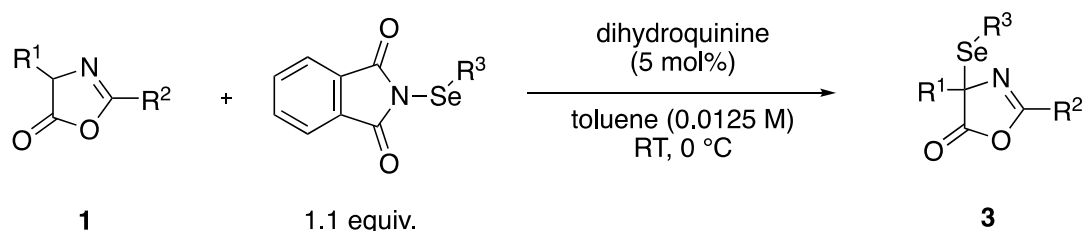

To a solution of azlactone (**1**, 1 equiv.) and dihydroquinine (5 mol%) in toluene (0.0125 M related to azlactone **1**) under an atmosphere of argon was added the corresponding *N*-(Aryl-seleno)phthalimide (1.1 equiv.) at 0 °C and under exclusion of light. The reaction mixture was stirred for 1 h under these conditions and the reaction was monitored by thin layer chromatography using heptanes:EtOAc (3.5:1) as mobile phase. After filtration through a pad of  $Na_2SO_4$  the crude product was subjected to silica gel column chromatography (eluent: heptanes:EtOAc) for purification.

### 3. Characterization Data of $\alpha$ -Selenated Azlactones 3

#### 4-Benzyl-2-phenyl-4-(phenylselanyl)oxazol-5(4H)-one (3a):

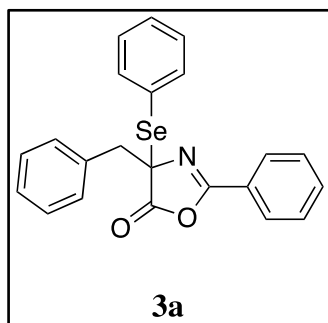

Compound **3a** was prepared according to the general procedure described in **2.2** and was obtained as a white solid (18.7 mg, 46  $\mu$ mol, 92% yield, e.r. = 89:11). **TLC** (heptanes:EtOAc = 3.5:1):  $R_f$  = 0.49 (UV).  $[\alpha]_D^{24}$  = -65.1 ( $c$  1.00,  $\text{CHCl}_3$ , e.r. = 89:11).  **$^1\text{H-NMR}$**  (300 MHz,  $\text{CDCl}_3$ , 298.0 K):  $\delta$  / ppm = 7.57 (d,  $J$  = 9.0 Hz, 2H), 7.50 (d,  $J$  = 6.0 Hz, 2H), 7.39 (t,  $J$  = 9.0 Hz, 1H), 7.26 (t,  $J$  = 9.0 Hz, 2H), 7.19-7.14 (m, 4H), 7.12-7.02 (m, 4H), 3.54 (d,  $J$  = 12.0 Hz, 1H), 3.42 (d,  $J$  = 15.0 Hz, 1H).  **$^{13}\text{C-NMR}$**  (75 MHz,  $\text{CDCl}_3$ , 298.0 K):  $\delta$  / ppm = 176.4, 160.7, 138.3, 134.6, 132.8, 130.2, 130.2, 129.2, 128.7, 128.5, 127.9, 127.6, 125.3, 73.9, 41.3. **HRMS** (ESI-QTOF, MeOH)  $m/z$ :  $[\text{M}+\text{H}]^+$  calculated for  $\text{C}_{23}\text{H}_{17}\text{NO}_2\text{Se}$ , 408.0498; found, 408.0500. **HPLC**: Chiralpak AD-H ( $n$ -hexane: $i$ -PrOH = 20:1, flow rate 0.3 mL/min, 10  $^\circ\text{C}$ ,  $\lambda$  = 220 nm), retention times  $t_{\text{R}}(\text{minor})$  = 26.4 min,  $t_{\text{R}}(\text{major})$  = 27.8 min.

#### 4-Methyl-2-phenyl-4-(phenylselanyl)oxazol-5(4H)-one (3c):

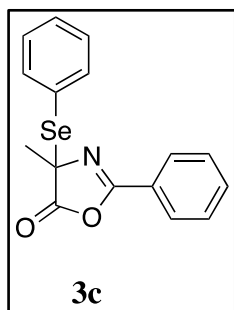

Compound **3c** was prepared according to the general procedure described in **2.2** and was obtained as a white solid (14.2 mg, 43  $\mu$ mol, 86% yield, e.r. = 94:6). **TLC** (heptanes:EtOAc = 3.5:1):  $R_f$  = 0.57 (UV).  $[\alpha]_D^{24}$  = -30.1 ( $c$  1.00,  $\text{CHCl}_3$ , e.r. = 94:6).  **$^1\text{H-NMR}$**  (700 MHz,  $\text{CDCl}_3$ , 298.0 K):  $\delta$  / ppm = 7.76 (d,  $J$  = 7.0 Hz, 2H), 7.57 (d,  $J$  = 14.0 Hz, 2H), 7.53 (t,  $J$  = 14.0 Hz, 1H), 7.40 (t,  $J$  = 7.0 Hz, 2H), 7.25 (t,  $J$  = 7.0 Hz, 1H), 7.14 (t,  $J$  = 7.0 Hz, 2H), 1.93 (s, 3H).  **$^{13}\text{C-NMR}$**  (176 MHz,  $\text{CDCl}_3$ , 298.0 K):  $\delta$  / ppm = 177.7, 160.6, 138.1, 133.0, 130.2, 129.1, 128.8, 127.9, 125.8, 125.3, 69.2, 21.9. **HRMS** (ESI-QTOF, MeOH)  $m/z$ :  $[\text{M}+\text{H}]^+$  calculated for  $\text{C}_{16}\text{H}_{14}\text{NO}_2\text{Se}$ , 332.0185; found, 332.0187. **HPLC**: Chiralpak AD-H ( $n$ -hexane: $i$ -PrOH = 20:1, flow rate 0.3 mL/min, 10  $^\circ\text{C}$ ,  $\lambda$  = 220 nm), retention times  $t_{\text{R}}(\text{major})$  = 24.8 min,  $t_{\text{R}}(\text{minor})$  = 30.3 min.

**4-Isopropyl- 2-phenyl-4-(phenylselenanyl)oxazol-5(4H)-one (3d):**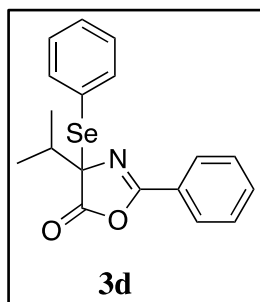

Compound **3d** was prepared according to the general procedure described in **2.2** and was obtained as a colourless solid (11.3 mg, 32  $\mu$ mol, 63% yield, e.r. = 79:21). **TLC** (heptanes:EtOAc = 3.5:1):  $R_f$  = 0.44 (UV).  $[\alpha]_D^{23}$  = -11.0 ( $c$  1.00, CHCl<sub>3</sub>, e.r. = 79:21). **<sup>1</sup>H-NMR** (500 MHz, CDCl<sub>3</sub>, 298.0 K):  $\delta$  / ppm = 7.75 (d,  $J$  = 7.9 Hz, 2H), 7.55-7.50 (m, 3H), 7.40 (t,  $J$  = 7.7 Hz, 2H), 7.23 (t,  $J$  = 7.3 Hz, 1H), 7.11 (t,  $J$  = 7.7 Hz, 2H), 2.54 (sep,  $J$  = 6.9 Hz, 1H) 1.33 (d,  $J$  = 6.7 Hz, 3H), 1.05 (d,  $J$  = 6.7 Hz, 3H). **<sup>13</sup>C-NMR** (126 MHz, CDCl<sub>3</sub>, 298.0 K):  $\delta$  / ppm = 176.9, 160.7, 138.4, 132.8, 130.0, 129.1, 128.7, 127.9, 125.5, 125.2, 79.2, 33.9, 18.6, 18.5. **HRMS** (ESI-QTOF, MeOH)  $m/z$ :  $[M+H]^+$  calculated for C<sub>18</sub>H<sub>18</sub>NO<sub>2</sub>Se, 360.0498; found, 360.0501. **HPLC**: Chiralpak AD-H ( $n$ -hexane: $i$ -PrOH = 20:1, flow rate 0.3 mL/min, 10 °C,  $\lambda$  = 220 nm), retention times  $t_R$ (major) = 17.1 min,  $t_R$ (minor) = 18.6 min.

**4-Isobutyl- 2-phenyl-4-(phenylselenanyl)oxazol-5(4H)-one (3e):**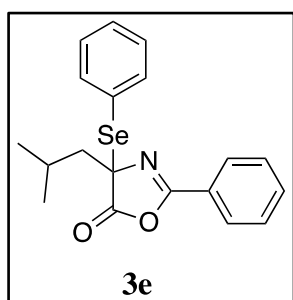

Compound **3e** was prepared according to the general procedure described in **2.2** and was obtained as a colourless solid (18.2 mg, 49  $\mu$ mol, 98% yield, e.r. = 92:8). **TLC** (heptanes:EtOAc = 3.5:1):  $R_f$  = 0.45 (UV).  $[\alpha]_D^{23}$  = -93.3 ( $c$  1.00, CHCl<sub>3</sub>, e.r. = 92:8). **<sup>1</sup>H-NMR** (500 MHz, CDCl<sub>3</sub>, 298.0 K):  $\delta$  / ppm = 7.74 (d,  $J$  = 7.2 Hz, 2H), 7.54-7.50 (m, 3H), 7.39 (t,  $J$  = 7.8 Hz, 2H), 7.24 (t,  $J$  = 7.4 Hz, 1H), 7.10 (t,  $J$  = 7.7 Hz, 2H), 2.32 (dd,  $J_1$  = 5.6 Hz,  $J_2$  = 14.2 Hz, 1H), 2.17 (dd,  $J_1$  = 7.7 Hz,  $J_2$  = 14.1 Hz, 1H), 1.83 (sep,  $J$  = 6.6 Hz, 1H), 0.95 (d,  $J$  = 6.6 Hz, 3H), 0.85 (d,  $J$  = 6.6 Hz, 3H). **<sup>13</sup>C-NMR** (126 MHz, CDCl<sub>3</sub>, 298.0 K):  $\delta$  / ppm = 177.5, 160.3, 138.3, 132.8, 130.2, 129.0, 128.7, 127.8, 125.4, 125.4, 73.4, 43.3, 27.0, 23.6, 22.7. **HRMS** (ESI-QTOF, MeOH)  $m/z$ :  $[M+H]^+$  calculated for C<sub>19</sub>H<sub>20</sub>NO<sub>2</sub>Se, 374.0654; found, 374.0657. **HPLC**: YMC Chiral Art Cellulose SB ( $n$ -hexane: $i$ -PrOH = 80:1, flow rate 0.2 mL/min, 10 °C,  $\lambda$  = 220 nm), retention times  $t_R$ (major) = 28.9 min,  $t_R$ (minor) = 30.0 min.

**4-(Cyclohexylmethyl)-2-phenyl-4-(phenylselenanyl)oxazol-5(4H)-one (3f):**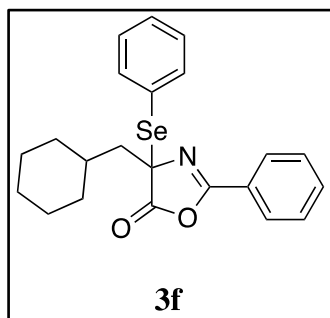

Compound **3f** was prepared according to the general procedure described in **2.2** and was obtained as a white solid (19.4 mg, 47  $\mu$ mol, 94% yield, e.r. = 93:7). **TLC** (heptanes:EtOAc = 3.5:1):  $R_f$  = 0.63 (UV).  $[\alpha]_D^{23}$  = -109.1 ( $c$  1.00,  $\text{CHCl}_3$ , e.r. = 93:7).  **$^1\text{H-NMR}$**  (300 MHz,  $\text{CDCl}_3$ , 298.0 K):  $\delta$  / ppm = 7.75-7.72 (m, 2H), 7.55-7.50 (m, 3H), 7.40 (t,  $J$  = 7.7 Hz, 2H), 7.23 (t,  $J$  = 7.4 Hz, 1H), 7.10 (t,  $J$  = 7.6 Hz, 2H), 2.33-2.15 (m, 2H), 1.73-1.47 (m, 6H), 1.19-0.88 (m, 5H).  **$^{13}\text{C-NMR}$**  (75 MHz,  $\text{CDCl}_3$ , 298.0 K):  $\delta$  / ppm = 177.6, 160.3, 138.3, 132.8, 130.2, 129.1, 128.8, 127.9, 125.5, 125.5, 77.4, 73.4, 42.2, 36.1, 34.1, 33.2, 26.2, 26.0. **HRMS** (ESI-QTOF, MeOH)  $m/z$ :  $[\text{M}+\text{H}]^+$  calculated for  $\text{C}_{22}\text{H}_{24}\text{NO}_2\text{Se}$ , 414.0967; found, 414.0965. **HPLC**: Chiralpak AD-H ( $n$ -hexane: $i$ -PrOH = 20:1, flow rate 0.7 mL/min, 10  $^\circ\text{C}$ ,  $\lambda$  = 220 nm), retention times  $t_R(\text{minor})$  = 20.6 min,  $t_R(\text{major})$  = 22.9 min.

**4-(2-(Methylthio)ethyl)-2-phenyl-4-(phenylselenanyl)oxazol-5(4H)-one (3g):**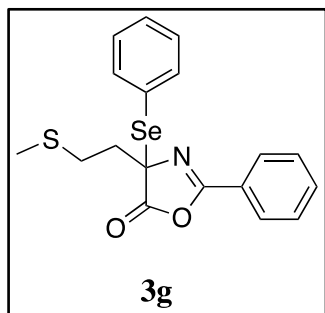

Compound **3g** was prepared according to the general procedure described in **2.2** and was obtained as a colourless solid (19.1 mg, 49  $\mu$ mol, 98% yield, e.r. = 93:7). **TLC** (heptanes:EtOAc = 3.5:1):  $R_f$  = 0.43 (UV).  $[\alpha]_D^{24}$  = -84.9 ( $c$  1.00,  $\text{CHCl}_3$ , e.r. = 93:7).  **$^1\text{H-NMR}$**  (300 MHz,  $\text{CDCl}_3$ , 298.0 K):  $\delta$  / ppm = 7.77-7.75 (m, 2H), 7.57-7.51 (m, 3H), 7.40 (t,  $J$  = 7.8 Hz, 2H), 7.29-7.23 (m, 1H), 7.14 (t,  $J$  = 7.6 Hz, 2H), 2.66-2.56 (m, 4H), 2.05 (s, 3H).  **$^{13}\text{C-NMR}$**  (75 MHz,  $\text{CDCl}_3$ , 298.0 K):  $\delta$  / ppm = 177.1, 161.5, 138.3, 133.0, 130.3, 129.2, 128.8, 128.0, 125.4, 125.0, 72.3, 34.1, 30.3, 15.1. **HRMS** (ESI-QTOF, MeOH)  $m/z$ :  $[\text{M}+\text{H}]^+$  calculated for  $\text{C}_{18}\text{H}_{18}\text{NO}_2\text{SSe}$ , 392.0218; found, 392.0219. **HPLC**: Chiralpak AD-H ( $n$ -hexane: $i$ -PrOH = 20:1, flow rate 0.3 mL/min, 10  $^\circ\text{C}$ ,  $\lambda$  = 220 nm), retention times  $t_R(\text{minor})$  = 31.7 min,  $t_R(\text{major})$  = 33.2 min.

**4-(4-Chlorobenzyl)- 2-phenyl-4-(phenylselanyl)oxazol-5(4H)-one (3h):**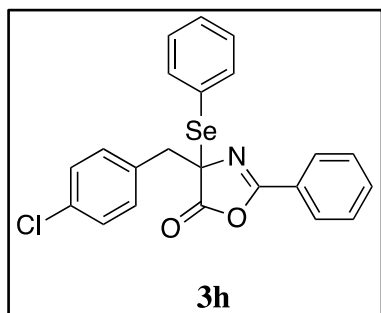

Compound **3h** was prepared according to the general procedure described in **2.2** and was obtained as a colourless solid (21.8 mg, 50  $\mu$ mol, 98% yield, e.r. = 82:18). **TLC** (heptanes:EtOAc = 3.5:1):  $R_f$  = 0.49 (UV).  $[\alpha]_D^{24}$  = -2.3 ( $c$  1.00, CHCl<sub>3</sub>, e.r. = 82:18). **<sup>1</sup>H-NMR** (300 MHz, CDCl<sub>3</sub>, 298.0 K):  $\delta$  / ppm = 7.62 (d,  $J$  = 6.0 Hz, 2H), 7.54 (d,  $J$  = 9.0 Hz, 2H), 7.48-7.43 (m, 1H), 7.32 (t,  $J$  = 9.0 Hz, 2H), 7.24-7.19 (m, 1H), 7.17-7.08 (m, 6H), 3.55 (d,  $J$  = 12.0 Hz, 1H), 3.42 (d,  $J$  = 12.0 Hz, 1H). **<sup>13</sup>C-NMR** (75 MHz, CDCl<sub>3</sub>, 298.0 K):  $\delta$  / ppm = 176.3, 160.9, 138.3, 134.5, 133.6, 133.0, 133.0, 131.6, 130.3, 129.2, 128.7, 127.9, 125.2, 125.1, 123.7, 73.4, 40.5. **HRMS** (ESI-QTOF, MeOH)  $m/z$ :  $[M+H]^+$  calculated for C<sub>22</sub>H<sub>17</sub>ClNO<sub>2</sub>Se, 442.0108; found, 442.0106. **HPLC**: Chiralpak AD-H ( $n$ -hexane: $i$ -PrOH = 20:1, flow rate 0.3 mL/min, 10 °C,  $\lambda$  = 220 nm), retention times  $t_R$ (major) = 31.4 min,  $t_R$ (minor) = 33.9 min.

**4-(4-Nitrobenzyl)- 2-phenyl-4-(phenylselanyl)oxazol-5(4H)-one (3i):**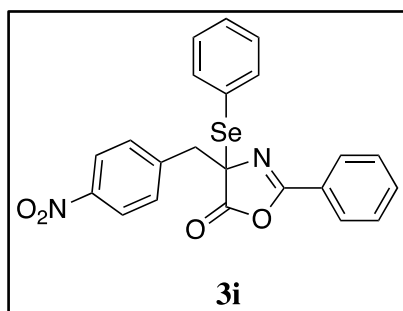

Compound **3i** was prepared according to the general procedure described in **2.2** and was obtained as a light-yellow solid (21.0 mg, 47  $\mu$ mol, 93% yield, e.r. = 69:31). **TLC** (heptanes:EtOAc = 3.5:1):  $R_f$  = 0.42 (UV).  $[\alpha]_D^{24}$  = -27.2 ( $c$  1.00, CHCl<sub>3</sub>, e.r. = 69:31). **<sup>1</sup>H-NMR** (300 MHz, CDCl<sub>3</sub>, 298.0 K):  $\delta$  / ppm = 8.08 (d,  $J$  = 8.8 Hz, 2H), 7.68-7.65 (m, 2H), 7.59-7.56 (m, 2H), 7.54-7.49 (m, 1H), 7.44 (d,  $J$  = 8.8 Hz, 2H), 7.37 (t,  $J$  = 7.8 Hz, 2H), 7.31-7.25 (m, 1H), 7.16 (t,  $J$  = 7.5 Hz, 2H), 3.72 (d,  $J$  = 13.7 Hz, 1H), 3.58 (d,  $J$  = 13.7 Hz, 1H). **<sup>13</sup>C-NMR** (75 MHz, CDCl<sub>3</sub>, 298.0 K):  $\delta$  / ppm = 176.1, 161.2, 147.5, 142.0, 138.3, 133.3, 131.2, 130.5, 129.3, 128.8, 127.9, 124.9, 124.8, 123.7, 72.6, 40.8. **HRMS** (ESI-QTOF, MeOH)  $m/z$ :  $[M+H]^+$  calculated for C<sub>22</sub>H<sub>17</sub>N<sub>2</sub>O<sub>4</sub>Se, 453.0348; found, 453.0352. **HPLC**: Chiralpak AD-H ( $n$ -hexane: $i$ -PrOH = 20:1, flow rate 0.7 mL/min, 10 °C,  $\lambda$  = 220 nm), retention times  $t_R$ (minor) = 30.0 min,  $t_R$ (major) = 32.4 min.

**4-Benzyl-4-(phenylselenanyl)-2-(4-(trifluoromethyl)phenyl)oxazol-5(4H)-one (3j):**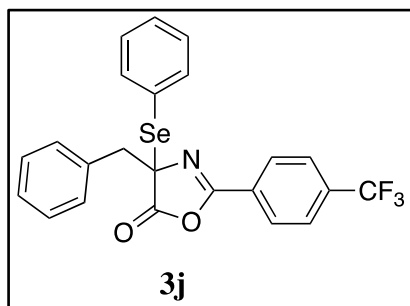

Compound **3j** was prepared according to the general procedure described in **2.2** and was obtained as a colourless solid (19.2 mg, 41  $\mu$ mol, 81% yield, e.r. = 72:28). **TLC** (heptanes:EtOAc = 3.5:1):  $R_f$  = 0.45 (UV).  $[\alpha]_D^{24}$  = -46.4 (c 1.00, CHCl<sub>3</sub>, e.r. = 72:28). **<sup>1</sup>H-NMR** (700 MHz, CDCl<sub>3</sub>, 298.0 K):  $\delta$  / ppm = 7.76 (d,  $J$  = 14.0 Hz, 2H), 7.62 (d,  $J$  = 7.0 Hz, 2H), 7.58 (d,  $J$  = 7.0 Hz, 2H), 7.28-7.24 (m, 3H), 7.21 (t,  $J$  = 7.0 Hz, 2H), 7.19-7.14 (m, 3H), 3.63 (d,  $J$  = 14.0 Hz, 1H), 3.54 (d,  $J$  = 7.0 Hz, 1H). **<sup>13</sup>C-NMR** (176 MHz, CDCl<sub>3</sub>, 298.0 K):  $\delta$  / ppm = 175.9, 159.4, 138.3, 134.3, 130.4, 130.2, 129.3, 128.6, 128.2, 127.7, 125.7, 125.7, 125.1, 122.8, 73.8, 41.1. **<sup>19</sup>F-NMR** (471 MHz, CDCl<sub>3</sub>, 298.0 K):  $\delta$  / ppm = -63.21.

**HRMS** (ESI-QTOF, MeOH)  $m/z$ :  $[M+H]^+$  calculated for C<sub>23</sub>H<sub>17</sub>F<sub>3</sub>NO<sub>2</sub>Se, 476.0371; found, 476.0377. **HPLC**: Chiralpak AD-H (*n*-hexane:*i*-PrOH = 20:1, flow rate 0.3 mL/min, 10 °C,  $\lambda$  = 220 nm), retention times  $t_R$ (minor) = 21.3 min,  $t_R$ (major) = 26.3 min.

**4-Benzyl-2-(4-nitrophenyl)-4-(phenylselenanyl)oxazol-5(4H)-one (3k):**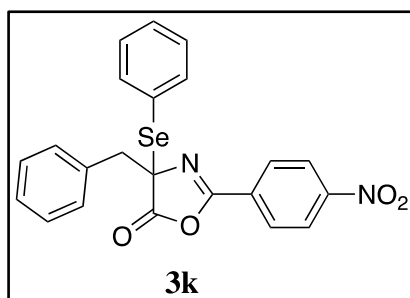

Compound **3k** was prepared according to the general procedure described in **2.2** and was obtained as a yellow solid (12.2 mg, 27  $\mu$ mol, 54% yield, e.r. = 63:37). **TLC** (heptanes:EtOAc = 3.5:1):  $R_f$  = 0.52 (UV).  $[\alpha]_D^{23}$  = -23.1 (c 1.00, CHCl<sub>3</sub>, e.r. = 63:37). **<sup>1</sup>H-NMR** (300 MHz, CDCl<sub>3</sub>, 298.0 K):  $\delta$  / ppm = 8.20 (d,  $J$  = 9.1 Hz, 2H), 7.81 (d,  $J$  = 8.7 Hz, 2H), 7.58-7.55 (m, 2H), 7.29-7.12 (m, 8H), 3.65 (d,  $J$  = 13.7 Hz, 1H), 3.54 (d,  $J$  = 13.7 Hz, 1H). **<sup>13</sup>C-NMR** (75 MHz, CDCl<sub>3</sub>, 298.0 K):  $\delta$  / ppm = 175.6, 158.8, 150.3, 138.3, 134.3, 130.8, 130.5, 130.2, 129.3, 128.8, 128.6, 127.8, 125.1, 123.9, 73.8, 41.0. **HRMS** (ESI-QTOF, MeOH)  $m/z$ :  $[M+H]^+$  calculated for C<sub>22</sub>H<sub>17</sub>N<sub>2</sub>O<sub>4</sub>Se, 453.0348; found, 453.0343.

**HPLC**: Chiralpak AD-H (*n*-hexane:*i*-PrOH = 20:1, flow rate 0.7 mL/min, 10 °C,  $\lambda$  = 220 nm), retention times  $t_R$ (minor) = 22.5 min,  $t_R$ (major) = 29.0 min.

**4-Benzyl-2-(4-methoxyphenyl)-4-(phenylselenanyl)oxazol-5(4H)-one (3l):**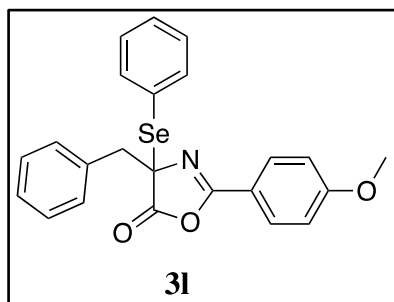

Compound **3l** was prepared according to the general procedure described in **2.2** and was obtained as a colourless solid (18.8 mg, 43  $\mu$ mol, 86% yield, e.r. = 91:9). **TLC** (heptanes:EtOAc = 3.5:1):  $R_f$  = 0.20 (UV).  $[\alpha]_D^{24}$  = -44.9 ( $c$  1.00,  $\text{CHCl}_3$ , e.r. = 91:9).  **$^1\text{H-NMR}$**  (300 MHz,  $\text{CDCl}_3$ , 298.0 K):  $\delta$  / ppm = 7.63-7.58 (m, 4H), 7.29-7.12 (m, 8H),

6.84 (d,  $J$  = 9.0 Hz, 2H), 3.83 (s, 3H), 3.62 (d,  $J$  = 13.6 Hz, 1H), 3.48 (d,  $J$  = 13.6 Hz, 1H).  **$^{13}\text{C-NMR}$**  (75 MHz,  $\text{CDCl}_3$ , 298.0 K):  $\delta$  / ppm = 176.6, 163.3, 160.5, 138.2, 134.7, 130.3, 130.1, 129.8, 129.1, 128.5, 127.5, 125.5, 117.6, 114.1, 74.0, 55.6, 41.4. **HRMS** (ESI-QTOF, MeOH)  $m/z$ :  $[\text{M}+\text{H}]^+$  calculated for  $\text{C}_{23}\text{H}_{20}\text{NO}_3\text{Se}$ , 438.0603; found, 438.0605. **HPLC**: Chiralpak AD-H ( $n$ -hexane: $i$ -PrOH = 20:1, flow rate 0.7 mL/min, 10  $^\circ\text{C}$ ,  $\lambda$  = 270 nm), retention times  $t_{\text{R}}(\text{minor})$  = 18.2 min,  $t_{\text{R}}(\text{major})$  = 23.3 min.

**4-Benzyl-2-(4-chlorophenyl)-4-(phenylselenanyl)oxazol-5(4H)-one (3m):**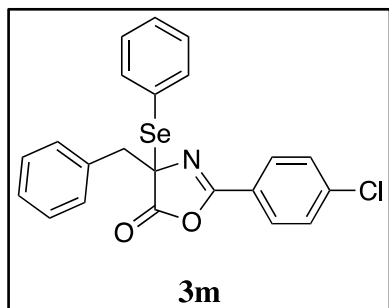

Compound **3m** was prepared according to the general procedure described in **2.2** and was obtained as a colourless solid (17.0 mg, 39  $\mu$ mol, 77% yield, e.r. = 74:26). **TLC** (heptanes:EtOAc = 3.5:1):  $R_f$  = 0.58 (UV).  $[\alpha]_D^{24}$  = -37.7 ( $c$  1.00,  $\text{CHCl}_3$ , e.r. = 74:26).  **$^1\text{H-NMR}$**  (300 MHz,  $\text{CDCl}_3$ , 298.0 K):  $\delta$  / ppm = 7.60-7.55 (m, 4H), 7.35-7.31 (m, 2H),

7.27-7.12 (m, 8H), 3.62 (d,  $J$  = 13.7 Hz, 1H), 3.50 (d,  $J$  = 13.7 Hz, 1H).  **$^{13}\text{C-NMR}$**  (75 MHz,  $\text{CDCl}_3$ , 298.0 K):  $\delta$  / ppm = 176.1, 159.8, 139.3, 138.3, 134.5, 130.3, 130.2, 129.2, 129.2, 128.6, 127.7, 125.2, 123.7, 73.9, 41.2. **HRMS** (ESI-QTOF, MeOH)  $m/z$ :  $[\text{M}+\text{H}]^+$  calculated for  $\text{C}_{22}\text{H}_{17}\text{ClNO}_2\text{Se}$ , 442.0108; found, 442.0108. **HPLC**: Chiralpak AD-H ( $n$ -hexane: $i$ -PrOH = 20:1, flow rate 0.3 mL/min, 10  $^\circ\text{C}$ ,  $\lambda$  = 220 nm), retention times  $t_{\text{R}}(\text{minor})$  = 25.1 min,  $t_{\text{R}}(\text{major})$  = 33.2 min.

**4-Benzyl-2-(naphthalen-2-yl)-4-(phenylselanyl)oxazol-5(4H)-one (3n):**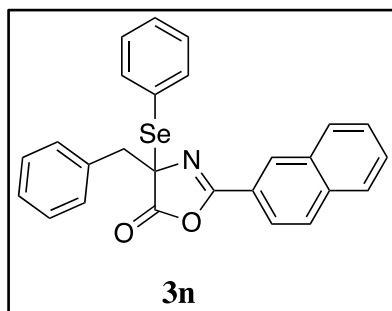

Compound **3n** was prepared according to the general procedure described in **2.2** and was obtained as a light-yellow solid (18.7 mg, 41  $\mu$ mol, 82% yield, e.r. = 87:13). **TLC** (heptanes:EtOAc = 3.5:1):  $R_f$  = 0.47 (UV).  $[\alpha]_D^{24}$  = -88.0 (c 1.00, CHCl<sub>3</sub>, e.r. = 87:13). **<sup>1</sup>H-NMR** (300 MHz, CDCl<sub>3</sub>, 298.0 K):  $\delta$  / ppm = 8.07 (s, 1H), 7.83 (t,  $J$  = 6.8 Hz, 4H), 7.64-7.61 (m, 2H), 7.58-7.49 (m, 2H), 7.31-7.28 (m, 2H), 7.24-7.09 (m, 6H), 3.68 (d,  $J$  = 13.5 Hz, 1H), 3.55 (d,  $J$  = 13.7 Hz, 1H). **<sup>13</sup>C-NMR** (75 MHz, CDCl<sub>3</sub>, 298.0 K):  $\delta$  / ppm = 176.4, 160.8, 138.2, 135.4, 134.6, 132.5, 130.2, 130.2, 129.4, 129.2, 129.2, 128.6, 128.5, 128.0, 127.6, 127.1, 125.3, 123.4, 122.5, 74.1, 41.3. **HRMS** (ESI-QTOF, MeOH)  $m/z$ :  $[M+H]^+$  calculated for C<sub>26</sub>H<sub>20</sub>NO<sub>2</sub>Se, 458.0654; found, 458.0649. **HPLC**: Chiralpak AD-H (*n*-hexane:*i*-PrOH = 20:1, flow rate 0.7 mL/min, 10 °C,  $\lambda$  = 220 nm), retention times  $t_R$ (minor) = 13.7 min,  $t_R$ (major) = 16.2 min.

**4-Benzyl-2-ethyl-4-(phenylselanyl)oxazol-5(4H)-one (3o):**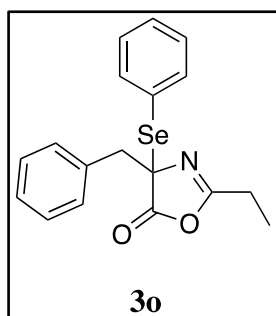

Compound **3o** was prepared according to the general procedure described in **2.2** and was obtained as a colourless solid (14.2 mg, 40  $\mu$ mol, 79% yield, e.r. = 53:47). **TLC** (heptanes:EtOAc = 3.5:1):  $R_f$  = 0.36 (UV). **<sup>1</sup>H-NMR** (500 MHz, CDCl<sub>3</sub>, 298.0 K):  $\delta$  / ppm = 7.63-7.60 (m, 2H), 7.42 (t,  $J$  = 7.7 Hz, 1H), 7.32 (t,  $J$  = 7.7 Hz, 2H), 7.25-7.19 (m, 5H), 3.48 (d,  $J$  = 13.5 Hz, 1H), 3.42 (d,  $J$  = 13.5 Hz, 1H), 2.02-1.88 (m, 2H), 0.84 (t,  $J$  = 7.7 Hz, 3H). **<sup>13</sup>C-NMR** (126 MHz, CDCl<sub>3</sub>, 298.0 K):  $\delta$  / ppm = 177.0, 166.0, 138.3, 134.4, 130.3, 130.2, 129.3, 128.5, 127.6, 125.3, 72.7, 41.0, 22.1, 8.8. **HPLC**: Chiralpak AD-H (*n*-hexane:*i*-PrOH = 20:1, flow rate 0.3 mL/min, 10 °C,  $\lambda$  = 220 nm), retention times  $t_R$ (major) = 21.5 min,  $t_R$ (minor) = 22.6 min.

**4-Benzyl-2-cyclohexyl-4-(phenylselanyl)oxazol-5(4H)-one (3p):**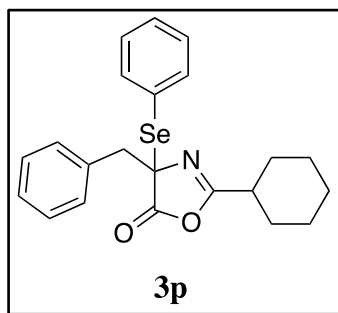

Compound **3p** was prepared according to the general procedure described in **2.2** and was obtained as a colourless solid (6.8 mg, 17  $\mu$ mol, 33% yield, e.r. = 53:47). **TLC** (heptanes:EtOAc = 3.5:1):  $R_f$  = 0.57 (UV).  **$^1\text{H-NMR}$**  (500 MHz,  $\text{CDCl}_3$ , 298.0 K):  $\delta$  / ppm = 7.64-7.62 (m, 2H), 7.42-7.39 (m, 1H), 7.32 (t,  $J$  = 7.7 Hz, 2H), 7.25-7.17 (m, 5H), 3.47 (d,  $J$  = 13.6 Hz, 1H), 3.42 (d,  $J$  = 13.2 Hz, 1H), 1.93-1.89 (m, 1H), 1.59-1.51 (m, 4H), 1.42-1.36 (m, 3H), 1.10-0.98 (m, 3H). **HRMS** (ESI-QTOF, MeOH)  $m/z$ :  $[\text{M}+\text{H}]^+$  calculated for  $\text{C}_{22}\text{H}_{24}\text{NO}_2\text{Se}$ , 414.0967; found, 414.0963. **HPLC**: Chiralpak AD-H ( $n$ -hexane: $i$ -PrOH = 20:1, flow rate 0.3 mL/min, 10  $^\circ\text{C}$ ,  $\lambda$  = 220 nm), retention times  $t_R(\text{major})$  = 19.2 min,  $t_R(\text{minor})$  = 19.9 min.

**4-(4-Chlorobenzyl)-2-(4-methoxyphenyl)-4-(phenylselanyl)oxazol-5(4H)-one (3q):**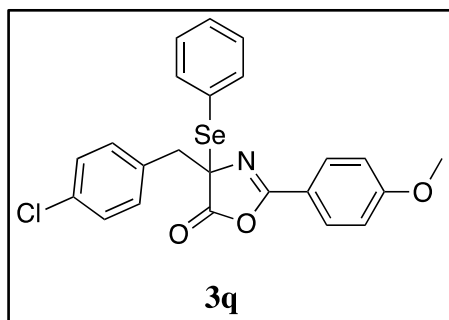

Compound **3q** was prepared according to the general procedure described in **2.2** and was obtained as a colourless solid (23.1 mg, 49  $\mu$ mol, 98% yield, e.r. = 87:13). **TLC** (heptanes:EtOAc = 3.5:1):  $R_f$  = 0.34 (UV).  $[\alpha]_D^{23}$  = -7.5 ( $c$  1.00,  $\text{CHCl}_3$ , e.r. = 87:13).  **$^1\text{H-NMR}$**  (300 MHz,  $\text{CDCl}_3$ , 298.0 K):  $\delta$  / ppm = 7.72-7.65 (m, 4H), 7.38-7.33 (m, 2H), 7.29-7.21 (m, 5H), 6.94 (d,  $J$  = 8.9 Hz, 2H), 3.92 (s, 3H), 3.66 (d,  $J$  = 13.8 Hz, 1H), 3.52 (d,  $J$  = 13.8 Hz, 1H).  **$^{13}\text{C-NMR}$**  (75 MHz,  $\text{CDCl}_3$ , 298.0 K):  $\delta$  / ppm = 176.5, 163.5, 160.7, 138.3, 133.5, 133.2, 131.6, 130.2, 129.9, 129.2, 128.7, 125.3, 117.4, 114.2, 73.5, 55.6, 40.7. **HRMS** (ESI-QTOF, MeOH)  $m/z$ :  $[\text{M}+\text{H}]^+$  calculated for  $\text{C}_{23}\text{H}_{19}\text{ClNO}_3\text{Se}$ , 472.0213; found, 472.0205. **HPLC**: Chiralpak AD-H ( $n$ -hexane: $i$ -PrOH = 20:1, flow rate 0.7 mL/min, 10  $^\circ\text{C}$ ,  $\lambda$  = 220 nm), retention times  $t_R(\text{minor})$  = 21.5 min,  $t_R(\text{major})$  = 25.2 min.

**2-(4-Methoxyphenyl)-4-(4-nitrobenzyl)-4-(phenylselenanyl)oxazol-5(4H)-one (3r):**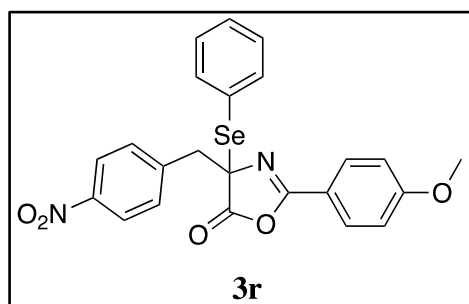

Compound **3r** was prepared according to the general procedure described in **2.2** and was obtained as a yellow solid (23.6 mg, 49  $\mu$ mol, 98% yield, e.r. = 79:21). **TLC** (heptanes:EtOAc = 3.5:1):  $R_f$  = 0.24 (UV).  $[\alpha]_D^{23}$  = -21.5 ( $c$  1.00,  $\text{CHCl}_3$ , e.r. = 79:21).  **$^1\text{H-NMR}$**  (300 MHz,  $\text{CDCl}_3$ , 298.0 K):  $\delta$  / ppm = 8.07 (d,  $J$  = 8.7 Hz, 2H),

7.63-7.57 (m, 4H), 7.43 (d,  $J$  = 8.4 Hz, 2H), 7.31-7.24 (m, 1H), 7.17 (t,  $J$  = 7.7 Hz, 2H), 6.85 (d,  $J$  = 9.1 Hz, 2H), 3.84 (s, 3H), 3.70 (d,  $J$  = 13.3 Hz, 1H), 3.56 (d,  $J$  = 13.9 Hz, 1H).  **$^{13}\text{C-NMR}$**  (75 MHz,  $\text{CDCl}_3$ , 298.0 K):  $\delta$  / ppm = 176.2, 163.7, 161.0, 147.5, 142.2, 138.3, 131.2, 130.4, 129.9, 129.2, 125.1, 123.7, 117.0, 114.3, 72.8, 55.6, 41.0. **HRMS** (ESI-QTOF, MeOH)  $m/z$ :  $[\text{M}+\text{H}]^+$  calculated for  $\text{C}_{23}\text{H}_{19}\text{N}_2\text{O}_5\text{Se}$ , 483.0454; found, 483.0462. **HPLC**: Chiralpak AD-H ( $n$ -hexane: $i$ -PrOH = 20:1, flow rate 1.2 mL/min, 10  $^\circ\text{C}$ ,  $\lambda$  = 220 nm), retention times  $t_R(\text{minor})$  = 28.0 min,  $t_R(\text{major})$  = 32.2 min.

**2-(4-Methoxyphenyl)-4-methyl-4-(phenylselenanyl)oxazol-5(4H)-one (3s):**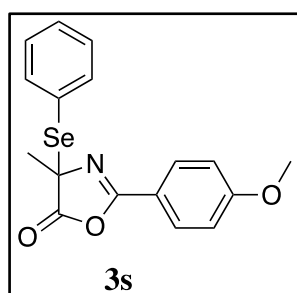

Compound **3s** was prepared according to the general procedure described in **2.2** and was obtained as a colourless solid (5.9 mg, 17  $\mu$ mol, 33% yield, e.r. = 71:29). **TLC** (heptanes:EtOAc = 3.5:1):  $R_f$  = 0.28 (UV).  $[\alpha]_D^{23}$  = +18.4 ( $c$  0.47,  $\text{CHCl}_3$ , e.r. = 71:29).  **$^1\text{H-NMR}$**  (300 MHz,  $\text{CDCl}_3$ , 298.0 K):  $\delta$  / ppm = 7.71 (d,  $J$  = 8.5 Hz, 2H), 7.57 (d,  $J$  = 7.7 Hz, 2H), 7.28-7.24 (m, 1H), 7.15 (t,  $J$  = 7.4 Hz, 2H),

6.89 (d,  $J$  = 8.5 Hz, 2H), 3.86 (s, 3H), 1.92 (s, 3H). **HRMS** (ESI-QTOF, MeOH)  $m/z$ :  $[\text{M}+\text{H}]^+$  calculated for  $\text{C}_{17}\text{H}_{16}\text{NO}_3\text{Se}$ , 362.0290; found, 362.0294. **HPLC**: Chiralpak AD-H ( $n$ -hexane: $i$ -PrOH = 20:1, flow rate 0.7 mL/min, 10  $^\circ\text{C}$ ,  $\lambda$  = 220 nm), retention times  $t_R(\text{minor})$  = 16.7 min,  $t_R(\text{major})$  = 17.8 min.

**4-Isobutyl-2-(4-methoxyphenyl)-4-(phenylselenanyl)oxazol-5(4H)-one (3t):**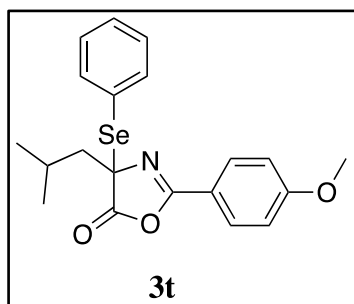

Compound **3t** was prepared according to the general procedure described in **2.2** and was obtained as a colourless solid (9.7 mg, 24  $\mu$ mol, 48% yield, e.r. = 59:41). **TLC** (heptanes:EtOAc = 3.5:1):  $R_f$  = 0.43 (UV).  $[\alpha]_D^{23}$  = -32.6 ( $c$  0.61, CHCl<sub>3</sub>, e.r. = 59:41). **<sup>1</sup>H-NMR** (300 MHz, CDCl<sub>3</sub>, 298.0 K):  $\delta$  / ppm = 7.70 (d,  $J$  = 8.7 Hz, 2H), 7.54 (d,  $J$  = 7.9 Hz, 2H), 7.26-7.23 (m, 1H), 7.12 (t,  $J$  = 7.7 Hz, 2H), 6.89 (d,  $J$  = 8.7 Hz, 2H), 3.86 (s, 3H), 2.33-2.29 (m, 1H), 2.18-2.14 (m, 1H), 1.82 (sep,  $J$  = 6.8 Hz, 1H), 0.94 (d,  $J$  = 6.8 Hz, 1H), 0.84 (d,  $J$  = 6.6 Hz, 1H). **<sup>13</sup>C-NMR** (126 MHz, CDCl<sub>3</sub>, 298.0 K):  $\delta$  / ppm = 177.7, 163.4, 160.2, 138.3, 130.1, 129.8, 129.0, 125.5, 117.8, 114.2, 73.6, 55.6, 43.5, 27.0, 23.7, 22.7. **HRMS** (ESI-QTOF, MeOH)  $m/z$ :  $[M+H]^+$  calculated for C<sub>20</sub>H<sub>22</sub>NO<sub>3</sub>Se, 404.0760; found, 404.0770. **HPLC**: Chiralpak AD-H (*n*-hexane:*i*-PrOH = 20:1, flow rate 0.7 mL/min, 10 °C,  $\lambda$  = 220 nm), retention times  $t_R$ (minor) = 21.1 min,  $t_R$ (major) = 26.1 min.

**2-(4-Methoxyphenyl)-4-(2-(methylthio)ethyl)-4-(phenylselenanyl)oxazol-5(4H)-one (3u):**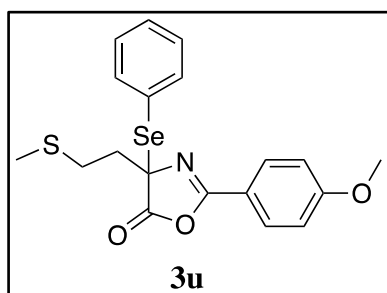

Compound **3u** was prepared according to the general procedure described in **2.2** and was obtained as a colourless solid (16.8 mg, 40  $\mu$ mol, 80% yield, e.r. = 91:9). **TLC** (heptanes:EtOAc = 3.5:1):  $R_f$  = 0.25 (UV).  $[\alpha]_D^{23}$  = -32.1 ( $c$  1.00, CHCl<sub>3</sub>, e.r. = 91:9). **<sup>1</sup>H-NMR** (300 MHz, CDCl<sub>3</sub>, 298.0 K):  $\delta$  / ppm = 7.72 (d,  $J$  = 8.6 Hz, 2H), 7.56 (d,  $J$  = 7.3 Hz, 2H), 7.29-7.24 (m, 1H), 7.15 (t,  $J$  = 8.0 Hz, 2H), 6.89 (d,  $J$  = 9.0 Hz, 2H), 3.86 (s, 3H), 2.71-2.52 (m, 4H), 2.04 (s, 3H). **<sup>13</sup>C-NMR** (75 MHz, CDCl<sub>3</sub>, 298.0 K):  $\delta$  / ppm = 177.2, 163.5, 161.2, 138.3, 130.2, 130.0, 129.1, 125.1, 117.7, 114.2, 72.5, 55.6, 34.3, 30.3, 15.1. **HRMS** (ESI-QTOF, MeOH)  $m/z$ :  $[M+H]^+$  calculated for C<sub>19</sub>H<sub>20</sub>NO<sub>3</sub>SSe, 422.0324; found, 422.0324. **HPLC**: Chiralpak AD-H (*n*-hexane:*i*-PrOH = 20:1, flow rate 0.7 mL/min, 10 °C,  $\lambda$  = 220 nm), retention times  $t_R$ (minor) = 24.2 min,  $t_R$ (major) = 29.7 min.

**4-Benzyl-2-phenyl-4-(*o*-tolylselanyl)oxazol-5(4*H*)-one (3v):**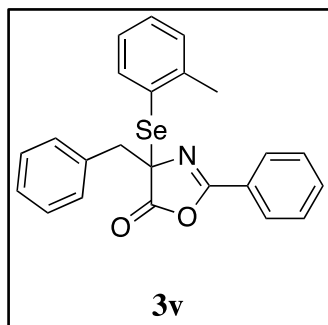

Compound **3v** was prepared according to the general procedure described in **2.2** using *N*-(*o*-tolylseleno)phthalimide as a selenation agent and was obtained as a colourless solid (16.0 mg, 38  $\mu$ mol, 76% yield, e.r. = 88:12). **TLC** (heptanes:EtOAc = 3.5:1):  $R_f$  = 0.53 (UV).  $[\alpha]_D^{24}$  = -84.4 ( $c$  1.00, CHCl<sub>3</sub>, e.r. = 88:12). **<sup>1</sup>H-NMR** (300 MHz, CDCl<sub>3</sub>, 298.0 K):  $\delta$  / ppm = 7.65-7.62 (m, 2H), 7.58 (d,  $J$  = 7.5 Hz, 1H), 7.50-7.45 (m, 1H), 7.34 (t,  $J$  = 7.7 Hz, 2H), 7.29-7.16 (m, 5H), 7.12-7.10 (m, 2H), 6.92-6.87 (m, 1H), 3.66 (d,  $J$  = 13.8 Hz, 1H), 3.54 (d,  $J$  = 13.8 Hz, 1H), 2.52 (s, 3H). **<sup>13</sup>C-NMR** (75 MHz, CDCl<sub>3</sub>, 298.0 K):  $\delta$  / ppm = 176.7, 160.3, 144.4, 139.9, 134.7, 132.7, 130.7, 130.3, 130.2, 128.6, 128.5, 127.8, 127.5, 126.5, 126.5, 125.3, 74.2, 41.2, 23.7. **HRMS** (ESI-QTOF, MeOH)  $m/z$ :  $[M+H]^+$  calculated for C<sub>23</sub>H<sub>20</sub>NO<sub>2</sub>Se, 422.0654; found, 422.0650. **HPLC**: YMC Chiral Art Cellulose SB (*n*-hexane:*i*-PrOH = 20:1, flow rate 0.3 mL/min, 10 °C,  $\lambda$  = 270 nm), retention times  $t_R$ (minor) = 24.1 min,  $t_R$ (major) = 25.3 min.

**4-Benzyl-2-phenyl-4-(*p*-tolylselanyl)oxazol-5(4*H*)-one (3w):**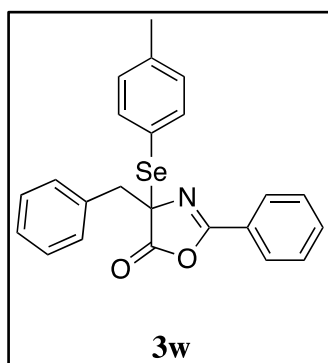

Compound **3w** was prepared according to the general procedure described in **2.2** using *N*-(*p*-tolylseleno)phthalimide as a selenation agent and was obtained as a colourless solid (10.1 mg, 24  $\mu$ mol, 48% yield, e.r. = 76:24). **TLC** (heptanes:EtOAc = 3.5:1):  $R_f$  = 0.44 (UV).  $[\alpha]_D^{23}$  = -51.8 ( $c$  0.80, CHCl<sub>3</sub>, e.r. = 76:24). **<sup>1</sup>H-NMR** (300 MHz, CDCl<sub>3</sub>, 298.0 K):  $\delta$  / ppm = 7.66 (d,  $J$  = 7.2 Hz, 2H), 7.51-7.44 (m, 3H), 7.36 (t,  $J$  = 7.8 Hz, 2H), 7.27-7.16 (m, 5H), 6.94 (d,  $J$  = 7.9 Hz, 2H), 3.62 (d,  $J$  = 13.8 Hz, 1H), 3.49 (d,  $J$  = 13.8 Hz, 1H), 2.20 (s, 3H). **<sup>13</sup>C-NMR** (75 MHz, CDCl<sub>3</sub>, 298.0 K):  $\delta$  / ppm = 176.5, 160.6, 140.6, 138.2, 134.7, 132.8, 130.2, 130.0, 128.6, 128.5, 127.9, 127.5, 125.4, 122.0, 73.7, 41.2, 21.3. **HRMS** (ESI-QTOF, MeOH)  $m/z$ :  $[M+H]^+$  calculated for C<sub>23</sub>H<sub>20</sub>NO<sub>2</sub>Se, 422.0654; found, 422.0658. **HPLC**: Chiralpak AD-H (*n*-hexane:*i*-PrOH = 20:1, flow rate 0.3 mL/min, 10 °C,  $\lambda$  = 220 nm), retention times  $t_R$ (major) = 30.9 min,  $t_R$ (minor) = 32.8 min.

**4-Benzyl-4-(benzylselanyl)-2-phenyloxazol-5(4H)-one (3x):**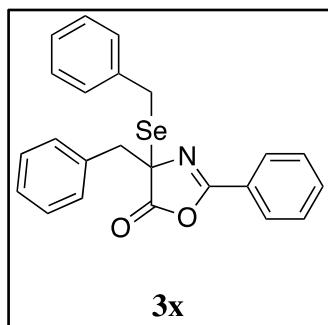

Compound **3x** was prepared according to the general procedure described in **2.2** using *N*-(phenylseleno)phthalimide as a selenation agent and a reaction time of 3 h. It was obtained as a colourless solid (8.4 mg, 20  $\mu$ mol, 40% yield, e.r. = 74:26). **TLC** (heptanes:EtOAc = 3.5:1):  $R_f$  = 0.51 (UV).  $[\alpha]_D^{23}$  = -61.3 (*c* 0.53, CHCl<sub>3</sub>, e.r. = 74:26). **<sup>1</sup>H-NMR** (300 MHz, CDCl<sub>3</sub>, 298.0 K):

$\delta$  / ppm = 7.92-7.89 (m, 2H), 7.58-7.52 (m, 1H), 7.47-7.42 (m, 2H), 7.32-7.15 (m, 10H), 4.07 (d,  $J$  = 11.2 Hz, 1H), 4.01 (d,  $J$  = 11.2 Hz, 1H), 3.56 (d,  $J$  = 13.8 Hz, 1H), 3.43 (d,  $J$  = 13.8 Hz, 1H). **<sup>13</sup>C-NMR** (75 MHz, CDCl<sub>3</sub>, 298.0 K):  $\delta$  / ppm = 177.0, 161.1, 136.4, 134.3, 133.2, 130.3, 129.5, 128.9, 128.8, 128.5, 128.2, 127.6, 127.4, 125.3, 69.4, 42.7, 28.7. **HRMS** (ESI-QTOF, MeOH)  $m/z$ :  $[M+H]^+$  calculated for C<sub>23</sub>H<sub>20</sub>NO<sub>2</sub>Se, 422.0654; found, 422.0652. **HPLC**: Chiralpak AD-H (*n*-hexane:*i*-PrOH = 20:1, flow rate 0.3 mL/min, 10 °C,  $\lambda$  = 220 nm), retention times  $t_R$ (minor) = 39.3 min,  $t_R$ (major) = 45.9 min.

***tert*-Butyl- ((1*S*)-1-(4-benzyl-5-oxo-4-(phenylselanyl)-4,5-dihydrooxazol-2-yl)ethyl)carbamate (8):**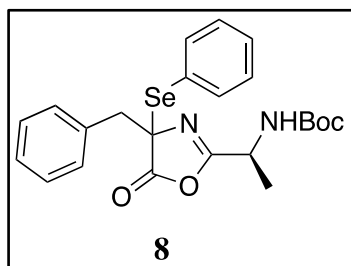

Compound **8** was prepared according to the general procedure described in **2.2** using *N*-(phenylseleno)phthalimide as a selenation agent and quinidine **QD** as a catalyst. It was obtained as a colourless solid (20.4 mg, 43  $\mu$ mol, 86% yield, d.r. = 17:83). The two diastereomers were separated using preparative HPLC.

**TLC** (heptanes:EtOAc = 3.5:1):  $R_f$  = 0.67 (UV). **<sup>1</sup>H-NMR** (300 MHz, CDCl<sub>3</sub>, 298.0 K, major diastereomer):  $\delta$  / ppm = 7.60 (d,  $J$  = 7.1 Hz, 2H), 7.47-7.41 (m, 1H), 7.36-7.31 (m, 2H), 7.24-7.15 (m, 5H), 4.66 (d,  $J$  = 8.1 Hz, 1H), 4.10-4.05 (m, 1H), 3.51-3.41 (m, 2H), 1.46 (s, 9H), 0.89 (d,  $J$  = 6.9 Hz, 3H). **<sup>1</sup>H-NMR** (300 MHz, CDCl<sub>3</sub>, 298.0 K, minor diastereomer):  $\delta$  / ppm = 7.64-7.61 (m, 2H), 7.44-7.38 (m, 1H), 7.35-7.30 (m, 2H), 7.25-7.23 (m, 3H), 7.19-7.15 (m, 2H), 4.66 (d,  $J$  = 7.9 Hz, 1H), 4.23-4.11 (m, 1H), 3.48 (d,  $J$  = 13.6 Hz, 1H), 3.39 (d,  $J$  = 13.6 Hz, 1H), 1.45 (s, 9H), 0.82 (d,  $J$  = 7.1 Hz, 3H). **HRMS** (ESI-QTOF, MeOH)  $m/z$ :  $[M+H]^+$  calculated for C<sub>23</sub>H<sub>27</sub>N<sub>2</sub>O<sub>4</sub>Se, 475.1131; found, 475.1126. **Preparative HPLC**: Grace Alltima Silica 10  $\mu$ m, 250 x 10 mm (*n*-hexane:EtOAc = 9:1, flow rate 5 mL/min,  $\lambda$  = 230 nm), retention times  $t_R$ (major) = 12.3 min,  $t_R$ (minor) = 14.4 min.

#### 4. Further Transformations of 4-Benzyl-2-phenyl-4-(phenylselenanyl)oxazol-5(4H)-one **3a**

##### Methyl 2-benzamido-2-methoxy-3-phenylpropanoate (**6**):

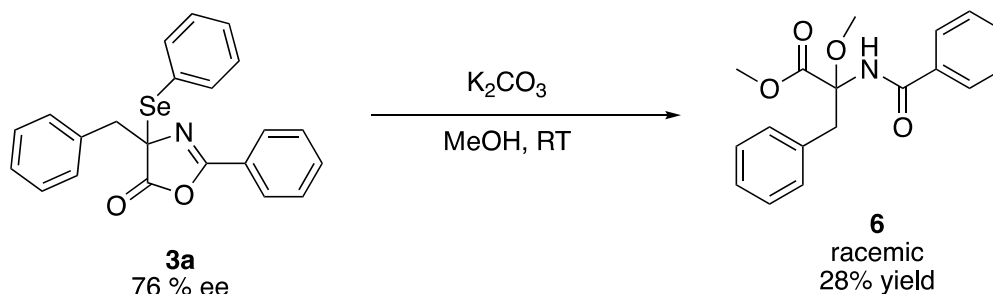

Compound **6** was prepared in analogy to a reported procedure<sup>4</sup> by addition of a solution of 4-benzyl-2-phenyl-4-(phenylselenanyl)oxazol-5(4H)-one (**3a**, 0.046 mmol, 18.6 mg, 1 equiv.) in 0.115 mL methanol to a suspension of  $\text{K}_2\text{CO}_3$  (0.046 mmol, 6.4 mg, 1 equiv.) in 0.115 mL methanol (in total 0.2 M concerning the substrate **3a**). The resulting mixture was stirred at room temperature under an argon atmosphere for 21 h. After extractive work up using DCM and sat. NaCl solution (aq.) the organic phases were dried over  $\text{Na}_2\text{SO}_4$  and the solvent was evaporated to obtain 10.5 mg of crude product **6** (28 % yield, e.r. = 52.5:47.5). **TLC** (heptanes:EtOAc = 4:1):  $R_f$  = 0.24 (UV).  **$^1\text{H-NMR}$**  (300 MHz,  $\text{CDCl}_3$ , 298.0 K):  $\delta$  / ppm = 7.74-7.71 (m, 2H), 7.56-7.50 (m, 1H), 7.46-7.41 (m, 2H), 7.27-7.24 (m, 2H), 7.17-7.10 (m, 3H), 4.06 (d,  $J$  = 13.4 Hz, 1H), 3.88 (s, 3H), 3.33 (d,  $J$  = 13.2 Hz, 1H), 3.31 (s, 3H).  **$^{13}\text{C-NMR}$**  (75 MHz,  $\text{CDCl}_3$ , 298.0 K):  $\delta$  / ppm = 170.8, 166.9, 134.5, 134.3, 132.2, 130.3, 128.9, 128.6, 127.5, 127.2, 89.2, 53.3, 52.3, 41.2. **HRMS** (ESI-QTOF, MeOH)  $m/z$ :  $[\text{M}+\text{Na}]^+$  calculated for  $\text{C}_{18}\text{H}_{19}\text{NO}_4\text{Na}$ , 336.1206; found, 336.1207. **HPLC**: Chiralpak AD-H ( $n$ -hexane: $i$ -PrOH = 20:1, flow rate 0.9 mL/min, 10 °C,  $\lambda$  = 220 nm), retention times  $t_R(\text{major})$  = 41.7 min,  $t_R(\text{minor})$  = 43.6 min.

<sup>4</sup> J. Yang, W. Sun, Z. He, C. Yu, G. Bao, Y. Li, Y. Liu, L. Hong and R. Wang, *Org. Lett.* 2018, **20**, 22, 7080-7084

## 5. Synthesis of $\alpha$ -Selenated $\alpha$ -Aryl-Isoxazolidin-5-ones **4**

### 5.1 General Racemic Procedure

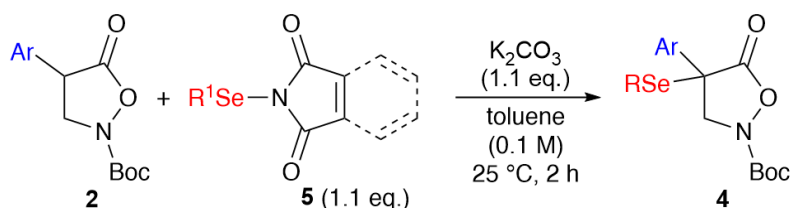

A flame-dried Schlenk-tube equipped with a stirring bar under argon atmosphere was charged with  $\alpha$ -Aryl-Isoxazolidin-5-one **2** (0.1 mmol, 1 equiv),  $\text{K}_2\text{CO}_3$  (15.2 mg, 1.1 equiv) and dry toluene (1 mL, 0.1 M with respect to **2**). Selenation reagent **5** (1.1-1.2 equiv) was added and the reaction flask was covered with aluminum foil. The reaction mixture was stirred for 2 h, whereupon it was concentrated under reduced pressure and directly subjected to column chromatography with gradient elution (silica gel, heptanes/EtOAc = 1/0 to 10/1) to obtain alpha-selenation products **4**.

### 5.2 General Enantioselective Procedure

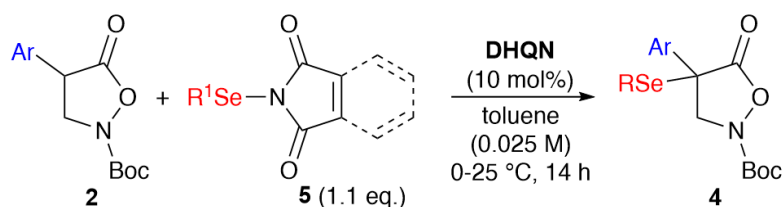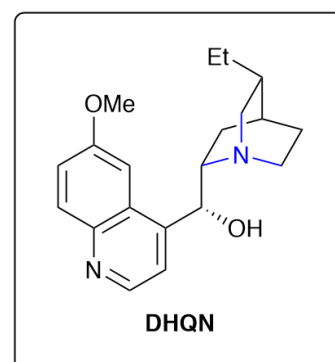

A flame-dried Schlenk-tube equipped with a stirring bar under argon atmosphere was charged with  $\alpha$ -Aryl-Isoxazolidin-5-one **2** (1 equiv), **DHQN** (10 mol%) and dry toluene (0.025 M with respect to **2**). The mixture was stirred until all solids dissolved to give a clear, colorless solution which was cooled in an ice bath for 10 min. Selenation reagent **5** (1.1-1.2 equiv) was added at once and the reaction flask was covered with aluminum foil. The reaction mixture was gradually warmed to room temperature and stirred for 14 h, whereupon it was concentrated under reduced pressure and directly subjected to column chromatography with gradient elution (silica gel, heptanes/EtOAc = 1/0 to 10/1) to obtain alpha-selenation products **4** in the given yields and enantiopurities.

## 6. Characterization Data of $\alpha$ -Selenated $\alpha$ -Aryl-Isoxazolidin-5-ones 4

### *tert*-Butyl 5-oxo-4-phenyl-4-(phenylselenanyl)isoxazolidine-2-carboxylate (**4a**):

Compound (+)-**4a** was prepared from **2a** (199 mg, 756  $\mu$ mol) and *N*-(phenylseleno)succinimide **9** (207 mg, 1.1 equiv) according to the general procedure described in **5.2** and was obtained as a colorless oil, which solidifies upon storage in a refrigerator. (227 mg, 543  $\mu$ mol, 72% yield, e.r. = 83:17). **TLC** (heptanes:EtOAc = 10:1):  $R_f$  = 0.24 (UV).  $[\alpha]_D^{23}$  = +90.2 (*c* 1.01, CHCl<sub>3</sub>). **<sup>1</sup>H-NMR** (300 MHz, CDCl<sub>3</sub>, 298.0 K):  $\delta$  / ppm = 7.41-7.34 (m, 3H), 7.30-7.18 (m, 7H), 4.75 (d, *J* = 12.7 Hz, 1H), 4.34 (d, *J* = 12.7 Hz, 1H), 1.56 (s, 9H). **<sup>13</sup>C-NMR** (75 MHz, CDCl<sub>3</sub>, 298.0 K):  $\delta$  / ppm = 172.1, 156.6, 138.3, 135.7, 130.6, 129.3, 128.8, 128.6, 127.5, 126.3, 84.7, 59.5, 49.3, 28.4. **HRMS** (ESI-QTOF, MeOH) *m/z*: [M+NH<sub>4</sub>]<sup>+</sup> calculated for C<sub>20</sub>H<sub>25</sub>N<sub>2</sub>O<sub>4</sub>Se<sup>+</sup>, 437.0974; found, 437.0973. **HPLC**: Chiralpak AD-H (*n*-hexane:*i*-PrOH = 20:1, flow rate 1.0 mL/min, 20 °C,  $\lambda$  = 254 nm), retention times  $t_R$ (minor) = 9.7 min,  $t_R$ (major) = 11.0 min.

### *tert*-Butyl 4-(naphthalen-2-yl)-5-oxo-4-(phenylselenanyl)isoxazolidine-2-carboxylate (**4b**):

Compound (+)-**4b** was prepared from **2b** (31.8 mg, 101  $\mu$ mol) and *N*-(phenylseleno)succinimide **9** (28 mg, 1.1 equiv) according to the general procedure described in **5.2** and was obtained as a colorless oil (31.2 mg, 67  $\mu$ mol, 66% yield, e.r. = 82:18). **TLC** (heptanes:EtOAc = 10:1):  $R_f$  = 0.23 (UV).  $[\alpha]_D^{23}$  = +84.6 (*c* 1.02, CHCl<sub>3</sub>). **<sup>1</sup>H-NMR** (300 MHz, CDCl<sub>3</sub>, 298.0 K):  $\delta$  / ppm = 7.85-7.78 (m, 2H), 7.68-7.60 (m, 3H), 7.53-7.43 (m, 2H), 7.37-7.30 (m, 1H), 7.22-7.10 (m, 4H), 4.85 (d, *J* = 12.7 Hz, 1H), 4.43 (d, *J* = 12.7 Hz, 1H), 1.57 (s, 9H). **<sup>13</sup>C-NMR** (75 MHz, CDCl<sub>3</sub>, 298.0 K):  $\delta$  / ppm = 172.0, 156.7, 138.3, 132.9, 132.6, 130.6, 129.3, 128.9, 128.7, 127.8, 127.2, 126.9, 126.7, 126.4, 124.9, 84.8, 59.5, 49.7, 28.4. **HRMS** (ESI-QTOF, MeOH) *m/z*: [M+NH<sub>4</sub>]<sup>+</sup> calculated for C<sub>24</sub>H<sub>27</sub>N<sub>2</sub>O<sub>4</sub>Se<sup>+</sup>, 487.1131; found, 487.1129. **HPLC**: Chiralpak AD-H (*n*-hexane:*i*-PrOH = 20:1, flow rate 1.0 mL/min, 20 °C,  $\lambda$  = 254 nm), retention times  $t_R$ (minor) = 12.5 min,  $t_R$ (major) = 16.7 min.

***tert*-Butyl 5-oxo-4-(phenylselanyl)-4-(thiophen-3-yl)isoxazolidine-2-carboxylate (4c):**

Compound (+)-**4c** was prepared from **2c** (26.8 mg, 100  $\mu$ mol) and *N*-(phenylseleno)succinimide **9** (28 mg, 1.1 equiv) according to the general procedure described in **5.2** and was obtained as a yellowish oil (21.6 mg, 51  $\mu$ mol, 51% yield, e.r. = 76:24). **TLC** (heptanes:EtOAc = 10:1):  $R_f$  = 0.30 (UV).  $[\alpha]_D^{23}$  = +54.7 ( $c$  0.98, CHCl<sub>3</sub>). **<sup>1</sup>H-NMR** (300 MHz, CDCl<sub>3</sub>, 298.0 K):  $\delta$  / ppm = 7.43-7.36 (m, 1H), 7.33 (dd,  $J$  = 5.1, 3.0 Hz, 1H), 7.28-7.21 (m, 4H), 7.17 (dd,  $J$  = 5.1, 1.4 Hz, 1H), 7.05 (dd,  $J$  = 3.0, 1.4 Hz, 1H), 4.74 (d,  $J$  = 12.6 Hz, 1H), 4.27 (d,  $J$  = 12.6 Hz, 1H), 1.58 (s, 9H). **<sup>13</sup>C-NMR** (75 MHz, CDCl<sub>3</sub>, 298.0 K):  $\delta$  / ppm = 172.1, 156.7, 138.3, 135.2, 130.6, 129.3, 126.8, 126.4, 124.2, 84.8, 59.6, 46.7, 28.5. **HRMS** (ESI-QTOF, MeOH)  $m/z$ :  $[M+NH_4]^+$  calculated for C<sub>18</sub>H<sub>23</sub>N<sub>2</sub>O<sub>4</sub>SSe<sup>+</sup>, 443.0538; found, 443.0538. **HPLC**: Chiralpak AD-H (*n*-hexane:*i*-PrOH = 20:1, flow rate 1.0 mL/min, 20 °C,  $\lambda$  = 254 nm), retention times  $t_R$ (minor) = 14.1 min,  $t_R$ (major) = 15.7 min.

***tert*-Butyl 4-(4-chlorophenyl)-5-oxo-4-(phenylselanyl)isoxazolidine-2-carboxylate (4d):**

Compound (+)-**4d** was prepared from **2d** (30.6 mg, 103  $\mu$ mol) and *N*-(phenylseleno)succinimide **9** (28 mg, 1.1 equiv) according to the general procedure described in **5.2** and was obtained as a colorless oil (34.8 mg, 77  $\mu$ mol, 75% yield, e.r. = 80:20). **TLC** (heptanes:EtOAc = 10:1):  $R_f$  = 0.24 (UV).  $[\alpha]_D^{24}$  = +93.3 ( $c$  1.01, CHCl<sub>3</sub>). **<sup>1</sup>H-NMR** (300 MHz, CDCl<sub>3</sub>, 298.0 K):  $\delta$  / ppm = 7.45-7.36 (m, 1H), 7.32-7.21 (m, 8H), 4.77 (d,  $J$  = 12.7 Hz, 1H), 4.27 (d,  $J$  = 12.7 Hz, 1H), 1.58 (s, 9H). **<sup>13</sup>C-NMR** (75 MHz, CDCl<sub>3</sub>, 298.0 K):  $\delta$  / ppm = 171.8, 156.6, 138.3, 134.7, 134.4, 130.9, 129.5, 128.9, 128.8, 126.0, 84.9, 59.2, 48.4, 28.4. **HRMS** (ESI-QTOF, MeOH)  $m/z$ :  $[M+NH_4]^+$  calculated for C<sub>20</sub>H<sub>24</sub>ClN<sub>2</sub>O<sub>4</sub>Se<sup>+</sup>, 471.0584; found, 471.0582. **HPLC**: Chiralpak AD-H (*n*-hexane:*i*-PrOH = 20:1, flow rate 1.0 mL/min, 20 °C,  $\lambda$  = 254 nm), retention times  $t_R$ (minor) = 12.0 min,  $t_R$ (major) = 16.1 min.

***tert*-Butyl 4-(4-bromophenyl)-5-oxo-4-(phenylselanyl)isoxazolidine-2-carboxylate (**4e**):**

Compound (+)-**4e** was prepared from **2e** (34.6 mg, 101  $\mu$ mol) and *N*-(phenylseleno)succinimide **9** (28 mg, 1.1 equiv) according to the general procedure described in **5.2** and was obtained as a colorless oil (38.1 mg, 77  $\mu$ mol, 76% yield, e.r. = 83:17). **TLC** (heptanes:EtOAc = 10:1):  $R_f$  = 0.27 (UV).  $[\alpha]_D^{24}$  = +93.3 ( $c$  1.00, CHCl<sub>3</sub>). **<sup>1</sup>H-NMR** (300 MHz, CDCl<sub>3</sub>, 298.0 K):  $\delta$  / ppm = 7.44-7.36 (m, 3H), 7.28-7.20 (m, 6H), 4.76 (d,  $J$  = 12.7 Hz, 1H), 4.26 (d,  $J$  = 12.7 Hz, 1H), 1.58 (s, 9H). **<sup>13</sup>C-NMR** (75 MHz, CDCl<sub>3</sub>, 298.0 K):  $\delta$  / ppm = 171.7, 156.5, 138.3, 134.9, 131.9, 130.9, 129.5, 129.0, 126.0, 122.9, 84.9, 59.2, 48.5, 28.4. **HRMS** (ESI-QTOF, MeOH)  $m/z$ : [M+NH<sub>4</sub>]<sup>+</sup> calculated for C<sub>20</sub>H<sub>24</sub>BrN<sub>2</sub>O<sub>4</sub>Se<sup>+</sup>, 515.0079; found, 515.0079. **HPLC**: Chiralpak AD-H (*n*-hexane:*i*-PrOH = 20:1, flow rate 1.0 mL/min, 20 °C,  $\lambda$  = 254 nm), retention times  $t_R$ (minor) = 12.6 min,  $t_R$ (major) = 17.6 min.

***tert*-Butyl 4-(4-fluorophenyl)-5-oxo-4-(phenylselanyl)isoxazolidine-2-carboxylate (**4f**):**

Compound (+)-**4f** was prepared from **2f** (28.4 mg, 101  $\mu$ mol) and *N*-(phenylseleno)succinimide **9** (28 mg, 1.1 equiv) according to the general procedure described in **5.2** and was obtained as a colorless oil (29.8 mg, 68  $\mu$ mol, 68% yield, e.r. = 81:19). **TLC** (heptanes:EtOAc = 10:1):  $R_f$  = 0.24 (UV).  $[\alpha]_D^{23}$  = +78.4 ( $c$  0.99, CHCl<sub>3</sub>). **<sup>1</sup>H-NMR** (300 MHz, CDCl<sub>3</sub>, 298.0 K):  $\delta$  / ppm = 7.43-7.31 (m, 3H), 7.27-7.23 (m, 4H), 6.99-6.91 (m, 2H), 4.77 (d,  $J$  = 12.7 Hz, 1H), 4.29 (d,  $J$  = 12.7 Hz, 1H), 1.58 (s, 9H). **<sup>13</sup>C-NMR** (75 MHz, CDCl<sub>3</sub>, 298.0 K):  $\delta$  / ppm = 172.0, 162.6 (d,  $^1J_{CF}$  = 249.0 Hz), 156.6, 138.3, 131.7 (d,  $^3J_{CF}$  = 3.4 Hz), 130.8, 129.4, 129.4 (d,  $^3J_{CF}$  = 8.0 Hz), 126.1, 115.7 (d,  $^2J_{CF}$  = 21.6 Hz), 84.9, 59.5, 48.5, 28.5. **<sup>19</sup>F-NMR** (282 MHz, CDCl<sub>3</sub>, 298.0 K):  $\delta$  / ppm = -113.1. **HRMS** (ESI-QTOF, MeOH)  $m/z$ : [M+NH<sub>4</sub>]<sup>+</sup> calculated for C<sub>20</sub>H<sub>24</sub>FN<sub>2</sub>O<sub>4</sub>Se<sup>+</sup>, 455.0880; found, 455.0881. **HPLC**: Chiralpak AD-H (*n*-hexane:*i*-PrOH = 20:1, flow rate 1.0 mL/min, 20 °C,  $\lambda$  = 254 nm), retention times  $t_R$ (minor) = 12.1 min,  $t_R$ (major) = 14.2 min.

***tert*-Butyl 4-(3,4-dichlorophenyl)-5-oxo-4-(phenylselenanyl)isoxazolidine-2-carboxylate (4g):**

Compound (+)-**4g** was prepared from **2g** (33.0 mg, 99  $\mu$ mol) and *N*-(phenylseleno)succinimide

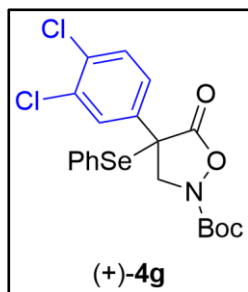

**9** (28 mg, 1.1 equiv) according to the general procedure described in **5.2** and was obtained as a colorless oil (34.7 mg, 71  $\mu$ mol, 72% yield, e.r. = 75:25). **TLC** (heptanes:EtOAc = 10:1):  $R_f$  = 0.30 (UV).  $[\alpha]_D^{24}$  = +77.2 ( $c$  0.96,  $\text{CHCl}_3$ ).  **$^1\text{H-NMR}$**  (300 MHz,  $\text{CDCl}_3$ , 298.0 K):  $\delta$  / ppm = 7.46-7.40 (m, 1H), 7.37 (d,  $J$  = 2.3 Hz, 1H), 7.33 (d,  $J$  = 8.5 Hz, 1H), 7.31-7.24 (m, 4H), 7.18 (dd,  $J$  = 8.5, 2.3 Hz, 1H), 4.77 (d,  $J$  = 12.7 Hz, 1H), 4.23 (d,  $J$  = 12.7 Hz, 1H), 1.59 (s, 9H).  **$^{13}\text{C-NMR}$**  (75 MHz,  $\text{CDCl}_3$ , 298.0 K):  $\delta$  / ppm = 171.4, 156.5, 138.4, 136.0, 133.0, 132.9, 131.2, 130.6, 129.6, 129.4, 126.6, 125.8, 85.1, 59.0, 47.6, 28.5 **HRMS** (ESI-QTOF, MeOH)  $m/z$ :  $[\text{M}+\text{NH}_4]^+$  calculated for  $\text{C}_{20}\text{H}_{23}\text{Cl}_2\text{N}_2\text{O}_4\text{Se}^+$ , 505.0195; found, 505.0195. **HPLC**: Chiralpak AD-H (*n*-hexane:*i*-PrOH = 20:1, flow rate 1.0 mL/min, 20  $^\circ\text{C}$ ,  $\lambda$  = 254 nm), retention times  $t_R$ (minor) = 10.2 min,  $t_R$ (major) = 13.1 min.

***tert*-Butyl 5-oxo-4-(phenylselenanyl)-4-(*p*-tolyl)isoxazolidine-2-carboxylate (4i):**

Compound (+)-**4i** was prepared from **2i** (28.4 mg, 102  $\mu$ mol) and *N*-(phenylseleno)succinimide

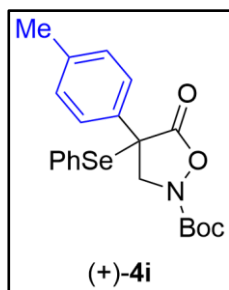

**9** (28 mg, 1.1 equiv) according to the general procedure described in **5.2** and was obtained as a reddish oil (18.3 mg, 42  $\mu$ mol, 41% yield, e.r. = 74:26). **TLC** (heptanes:EtOAc = 10:1):  $R_f$  = 0.27 (UV).  $[\alpha]_D^{23}$  = +44.6 ( $c$  0.99,  $\text{CHCl}_3$ ).  **$^1\text{H-NMR}$**  (500 MHz,  $\text{CDCl}_3$ , 298.0 K):  $\delta$  / ppm = 7.40-7.36 (m, 1H), 7.30-7.21 (m, 6H), 7.08 (d,  $J$  = 8.1 Hz, 2H), 4.71 (d,  $J$  = 12.6 Hz, 1H), 4.32 (d,  $J$  = 12.6 Hz, 1H), 2.32 (s, 3H), 1.55 (s, 9H).  **$^{13}\text{C-NMR}$**  (126 MHz,  $\text{CDCl}_3$ , 298.0 K):  $\delta$  / ppm = 172.2, 156.6, 138.6, 138.3, 132.6, 130.6, 129.5, 129.3, 127.3, 126.4, 84.6, 59.6, 49.5, 28.4, 21.5. **HRMS** (ESI-QTOF, MeOH)  $m/z$ :  $[\text{M}+\text{NH}_4]^+$  calculated for  $\text{C}_{21}\text{H}_{27}\text{N}_2\text{O}_4\text{Se}^+$ , 451.1131; found, 451.1128. **HPLC**: Chiralpak AD-H (*n*-hexane:*i*-PrOH = 20:1, flow rate 1.0 mL/min, 20  $^\circ\text{C}$ ,  $\lambda$  = 254 nm), retention times  $t_R$ (minor) = 9.2 min,  $t_R$ (major) = 12.6 min.

***tert*-Butyl 5-oxo-4-phenyl-4-(*o*-tolylselenanyl)isoxazolidine-2-carboxylate (4j):**

Compound (+)-**4j** was prepared from **2a** (26.5 mg, 101  $\mu$ mol) and *N*-(*o*-tolylseleno)phthalimide

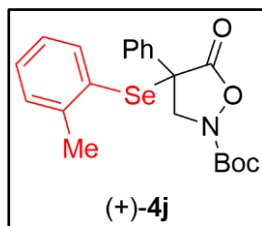

(38 mg, 1.2 equiv) according to the general procedure described in **5.2**

and was obtained as a colorless oil (37.6 mg, 87  $\mu$ mol, 76% yield, e.r. = 76:24). **TLC** (heptanes:EtOAc = 10:1):  $R_f$  = 0.32 (UV).  $[\alpha]_D^{24}$  = +79.5

( $c$  0.99,  $\text{CHCl}_3$ ).  **$^1\text{H-NMR}$**  (500 MHz,  $\text{CDCl}_3$ , 298.0 K):  $\delta$  / ppm = 7.36-7.33 (m, 2H), 7.30-7.23 (m, 5H), 7.19 (d,  $J$  = 7.4 Hz, 1H), 7.05-7.01

(m, 1H), 4.87 (d,  $J$  = 12.7 Hz, 1H), 4.32 (d,  $J$  = 12.7 Hz, 1H), 2.07 (s, 3H), 1.58 (s, 9H).

**$^{13}\text{C-NMR}$**  (126 MHz,  $\text{CDCl}_3$ , 298.0 K):  $\delta$  / ppm = 171.6, 156.7, 144.9, 140.0, 135.8, 131.2, 130.5, 128.8, 128.6, 127.3, 127.2, 126.7, 84.7, 59.8, 48.3, 28.4, 23.0. **HRMS** (ESI-QTOF,

MeOH)  $m/z$ :  $[\text{M}+\text{NH}_4]^+$  calculated for  $\text{C}_{21}\text{H}_{27}\text{N}_2\text{O}_4\text{Se}^+$ , 451.1131; found, 451.1125. **HPLC**:

Chiralpak AD-H (*n*-hexane:*i*-PrOH = 20:1, flow rate 1.0 mL/min, 10  $^\circ\text{C}$ ,  $\lambda$  = 240 nm), retention times  $t_R(\text{minor})$  = 9.1 min,  $t_R(\text{major})$  = 11.8 min.

***tert*-Butyl 5-oxo-4-phenyl-4-(*p*-tolylselenanyl)isoxazolidine-2-carboxylate (4k):**

Compound (+)-**4k** was prepared from **2a** (26.4 mg, 100  $\mu$ mol) and

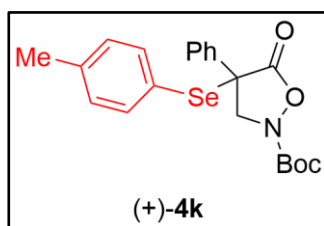

*N*-(*p*-tolylseleno)phthalimide (38 mg, 1.2 equiv) according to the general procedure described in **5.2** and was obtained as a colorless

oil (8.3 mg, 19  $\mu$ mol, 19% yield, e.r. = 72:28). **TLC** (heptanes:EtOAc = 10:1):  $R_f$  = 0.32 (UV).  $[\alpha]_D^{24}$  = +44.6 ( $c$  0.83,

$\text{CHCl}_3$ ).  **$^1\text{H-NMR}$**  (300 MHz,  $\text{CDCl}_3$ , 298.0 K):  $\delta$  / ppm = 7.41-7.34

(m, 2H), 7.30-7.25 (m, 3H), 7.14 (d,  $J$  = 7.9 Hz, 2H), 7.03 (d,  $J$  = 7.9 Hz, 2H), 4.73 (d,  $J$  =

12.7 Hz, 1H), 4.32 (d,  $J$  = 12.7 Hz, 1H), 2.33 (s, 3H), 1.56 (s, 9H).  **$^{13}\text{C-NMR}$**  (75 MHz,  $\text{CDCl}_3$ ,

298.0 K):  $\delta$  / ppm = 172.1, 156.7, 141.1, 138.2, 135.9, 130.2, 128.8, 128.5, 127.4, 122.9, 84.6,

59.4, 49.3, 28.4, 21.7. **HRMS** (ESI-QTOF, MeOH)  $m/z$ :  $[\text{M}+\text{NH}_4]^+$  calculated for

$\text{C}_{21}\text{H}_{27}\text{N}_2\text{O}_4\text{Se}^+$ , 451.1131; found, 451.1129. **HPLC**: Chiralpak AD-H

(*n*-hexane:*i*-PrOH = 20:1, flow rate 1.0 mL/min, 10  $^\circ\text{C}$ ,  $\lambda$  = 240 nm), retention times

***tert*-Butyl 4-(benzylselanyl)-5-oxo-4-phenylisoxazolidine-2-carboxylate (**4l**):**

Compound (+)-**4l** was prepared from **2a** (26.6 mg, 101  $\mu$ mol) and *N*-(benzylseleno)phthalimide

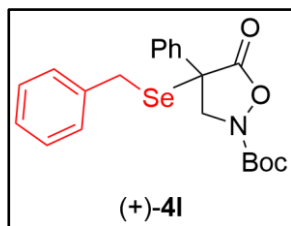

(38 mg, 1.2 equiv) according to the general procedure described in **5.2**

and was obtained as a colorless oil (9.7 mg, 22  $\mu$ mol, 22% yield, e.r. = 61:39). **TLC** (heptanes:EtOAc = 10:1):  $R_f$  = 0.32 (UV).  $[\alpha]_D^{23}$  = +17.3

(*c* 0.97, CHCl<sub>3</sub>). **<sup>1</sup>H-NMR** (500 MHz, CDCl<sub>3</sub>, 298.0 K):  $\delta$  / ppm =

7.70-7.67 (m, 2H), 7.42-7.38 (m, 2H), 7.36-7.32 (m, 1H), 7.22-7.15 (m,

3H), 7.11-7.08 (m, 2H), 4.65 (d,  $J$  = 12.7 Hz, 1H), 4.18 (d,  $J$  = 12.7 Hz, 1H), 4.04 (d,  $J$  =

10.8 Hz, 1H), 3.69 (d,  $J$  = 10.8 Hz, 1H), 1.51 (s, 9H). **<sup>13</sup>C-NMR** (126 MHz, CDCl<sub>3</sub>, 298.0 K):

$\delta$  / ppm = 172.8, 156.5, 136.2, 135.7, 129.6, 129.3, 128.9, 127.8, 127.6, 84.8, 61.5, 47.2, 30.5,

28.4. **HRMS** (ESI-QTOF, MeOH)  $m/z$ :  $[M+NH_4]^+$  calculated for C<sub>21</sub>H<sub>27</sub>N<sub>2</sub>O<sub>4</sub>Se<sup>+</sup>, 451.1131;

found, 451.1133. **HPLC**: Chiralpak OD-H (*n*-hexane:*i*-PrOH = 20:1, flow rate 1.0 mL/min,

10 °C,  $\lambda$  = 220 nm), retention times  $t_R$ (minor) = 11.9 min,  $t_R$ (major) = 14.1 min.

## 7. Further Transformations of *N*-Boc 4,4-phenyl(phenylselenanyl)isoxazolidin-5-one 4a

### *tert*-Butyl (3-((4-chlorobenzyl)amino)-3-oxo-2-phenyl-2-(phenylselenanyl)propyl)(hydroxy)carbamate (9a):

Compound (+)-**9a** was prepared in analogy to a reported procedure<sup>5</sup> by treatment of

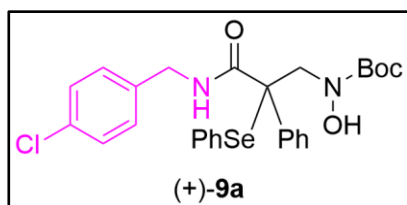

enantioenriched selenation product (+)-**4a** (38.4 mg, 92  $\mu$ mol, e.r. = 83:17) with 4-chlorobenzylamine (60  $\mu$ L, 5 equiv) in *t*BuOH (2 mL, 0.05 M). The crude product was purified *via* flash column chromatography (silica gel, heptanes/EtOAc =

2/1) to obtain amide (+)-**9a** as a white solid (42.8 mg, 76  $\mu$ mol, 83% yield, e.r. = 83:17). **TLC** (heptanes:EtOAc = 2:1):  $R_f$  = 0.44 (UV).  $[\alpha]_D^{23}$  = +33.2 (*c* 1.04, CHCl<sub>3</sub>). **<sup>1</sup>H-NMR** (300 MHz, CDCl<sub>3</sub>, 298.0 K):  $\delta$  / ppm = 8.12 (s, 1H), 7.40-7.15 (m, 15H), 6.83 (bt, *J* = 5.7 Hz, 1H), 4.57 (d, *J* = 15.2 Hz, 1H), 4.39 (d, *J* = 6.0 Hz, 2H), 4.07 (d, *J* = 15.2 Hz, 1H), 1.27 (s, 9H). **<sup>13</sup>C-NMR** (75 MHz, CDCl<sub>3</sub>, 298.0 K):  $\delta$  / ppm = 173.9, 155.3, 138.6, 137.5, 136.2, 133.9, 130.0, 129.5, 129.2, 128.8, 128.7, 128.4, 126.8, 81.6, 61.9, 59.1, 44.3, 28.4. **HRMS** (ESI-QTOF, MeOH) *m/z*: [M+Na]<sup>+</sup> calculated for C<sub>27</sub>H<sub>29</sub>ClN<sub>2</sub>NaO<sub>4</sub>Se<sup>+</sup>, 583.0873; found, 583.0875. **HPLC**: Chiralpak OD-H (*n*-hexane:*i*-PrOH = 2:1, flow rate 0.5 mL/min, 20 °C,  $\lambda$  = 254 nm), retention times  $t_R$ (minor) = 13.8 min,  $t_R$ (major) = 27.4 min.

### *tert*-Butyl hydroxy(3-((4-methoxybenzyl)amino)-3-oxo-2-phenyl-2-(phenylselenanyl)propyl)carbamate (9b):

Analogously prepared to **9a**, using 4-methoxybenzylamine (60  $\mu$ L, 5 equiv). Amide (+)-**9b** was

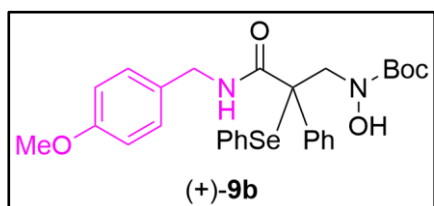

obtained as an off-white solid (42.8 mg, 77  $\mu$ mol, 84% yield, e.r. = 83:17). **TLC** (heptanes:EtOAc = 2:1):  $R_f$  = 0.37 (UV).  $[\alpha]_D^{23}$  = +29.4 (*c* 1.07, CHCl<sub>3</sub>). **<sup>1</sup>H-NMR** (500 MHz, CDCl<sub>3</sub>, 298.0 K):  $\delta$  / ppm = 8.40 (s, 1H),

7.42-7.39 (m, 2H), 7.38-7.33 (m, 3H), 7.29-7.24 (m, 4H), 7.23-7.16 (m, 4H), 6.88-6.84 (m, 2H), 6.79 (bs, 1H), 4.59 (d, *J* = 15.2 Hz, 1H), 4.38 (dd, *J* = 5.6, 2.4 Hz, 2H), 4.02 (d, *J* = 15.2 Hz, 1H), 3.81 (s, 3H), 1.26 (s, 9H). **<sup>13</sup>C-NMR** (126 MHz, CDCl<sub>3</sub>, 298.0 K):  $\delta$  / ppm = 173.9, 159.6, 155.0, 138.6, 137.5, 130.0, 129.5, 128.7, 128.3, 126.8, 114.5, 81.4, 62.0, 59.4, 55.7, 44.5, 28.4. **HRMS** (ESI-QTOF, MeOH) *m/z*: [M+Na]<sup>+</sup> calculated for C<sub>28</sub>H<sub>32</sub>N<sub>2</sub>NaO<sub>5</sub>Se<sup>+</sup>, 579.1369; found,

<sup>5</sup> P. Zebrowski, I. Eder, A. Eitzinger, S. C. Mallojjala and M. Waser, *ACS Org. Inorg. Au* 10.1021/acsorginorgau.1c00025.

579.1364. **HPLC**: Chiralpak OD-H (*n*-hexane:*i*-PrOH = 2:1, flow rate 0.5 mL/min, 20 °C,  $\lambda$  = 254 nm), retention times  $t_R$ (minor) = 19.1 min,  $t_R$ (major) = 31.3 min.

**Methyl 3-((*tert*-butoxycarbonyl)(hydroxy)amino)-2-phenyl-2-(phenylselenanyl)propanoate (10):**

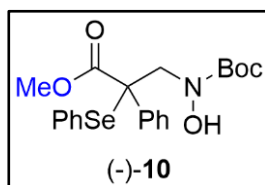

A reaction vial was charged with (+)-**4a** (42.4 mg, 101  $\mu$ mol, e.r. = 83:17), MeOH (1 mL, 0.1 M) and Amberlyst A21 (100 mg). The heterogenous mixture was stirred vigorously for 24 h at room temperature, whereupon it was filtered over cotton and concentrated under reduced pressure. The crude product was purified by preparative TLC (silica gel, heptanes/EtOAc = 2/1) to obtain (-)-**10** as a colorless oil (21.0 mg, 47  $\mu$ mol, 46% yield, e.r. = 83:17). **TLC** (heptanes:EtOAc = 2:1):  $R_f$  = 0.29 (UV).  $[\alpha]_D^{24}$  = -21.1 (*c* 0.43, CHCl<sub>3</sub>). **<sup>1</sup>H-NMR** (300 MHz, CDCl<sub>3</sub>, 298.0 K):  $\delta$  / ppm = 7.35-7.29 (m, 3H), 7.25-7.14 (m, 7H), 6.41 (s, 1H), 4.43 (d, *J* = 14.8 Hz, 1H), 4.25 (d, *J* = 14.8 Hz, 1H), 3.70 (s, 3H), 1.38 (s, 9H). **<sup>13</sup>C-NMR** (176 MHz, CDCl<sub>3</sub>, 298.0 K):  $\delta$  / ppm = 173.6, 156.0, 138.3, 129.8, 129.0, 128.4, 128.3, 127.9, 127.1, 82.3, 60.3, 57.0, 53.3, 28.4. **HRMS** (ESI-QTOF, MeOH) *m/z*: [M+Na]<sup>+</sup> calculated for C<sub>21</sub>H<sub>25</sub>NNaO<sub>5</sub>Se<sup>+</sup>, 474.0790; found, 474.0795. **HPLC**: YMC Chiral ART Cellulose-SB (*n*-hexane:*i*-PrOH = 4:1, flow rate 0.5 mL/min, 20 °C,  $\lambda$  = 254 nm), retention times  $t_R$ (major) = 22.7 min,  $t_R$ (minor) = 26.2 min.

***tert*-Butyl 5-oxo-4-phenylisoxazole-2(5*H*)-carboxylate (11):**

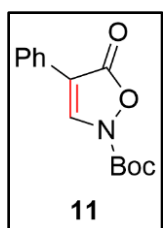

A flame-dried Schlenk tube was charged with **4a** (40.8 mg, 98  $\mu$ mol) and dry CH<sub>2</sub>Cl<sub>2</sub> (1 mL, 0.1 M). mCPBA (49.6 mg, 2.3 equiv,  $\leq 77\%$ ) was added and the mixture was stirred for 24 h at room temperature. The reaction was quenched by addition of sat. Na<sub>2</sub>S<sub>2</sub>O<sub>3</sub> solution (1 mL) and the organic phase was washed with sat. Na<sub>2</sub>S<sub>2</sub>O<sub>3</sub> (2x 1 mL) and sat. NaHCO<sub>3</sub> (3x 1 mL) solution, dried over anhydrous Na<sub>2</sub>SO<sub>4</sub>, filtered and concentrated under reduced pressure. **11** was obtained as a off-white solid (21.2 mg, 81  $\mu$ mol, 83% yield). **TLC** (heptanes:EtOAc = 5:1):  $R_f$  = 0.34 (UV). **<sup>1</sup>H-NMR** (300 MHz, CDCl<sub>3</sub>, 298.0 K):  $\delta$  / ppm = 8.51 (s, 1H), 7.80-7.75 (m, 2H), 7.45-7.30 (m, 3H), 1.63 (s, 9H). **<sup>13</sup>C-NMR** (75 MHz, CDCl<sub>3</sub>, 298.0 K):  $\delta$  / ppm = 166.6, 144.9, 138.9, 129.2, 128.7, 128.0, 126.1, 107.5, 87.5, 28.4. **HRMS** (ESI-QTOF, MeOH) *m/z*: [M+Na]<sup>+</sup> calculated for C<sub>14</sub>H<sub>15</sub>NNaO<sub>4</sub><sup>+</sup>, 284.0893; found, 284.0893.

## 8. Single-Crystal Analysis

Single crystals suitable for single crystal X-ray diffraction were obtained by re-crystallisation from diethyl ether. Single-crystal structure analysis was carried out at room temperature on a Bruker D8 Quest ECO diffractometer with graphite-monochromated MoK $\alpha$  radiation ( $\lambda = 0.71073$  Å). The structures were solved by direct methods (SHELXS-97<sup>6</sup>) and refined by full-matrix least-squares on  $F^2$  (SHELXL-2014/7<sup>7</sup>). The H atoms were calculated geometrically, and a riding model was applied in the refinement process. Crystallographic details for (*rac*)-**4a** can be found in Table 1. CCDC 2121570 contain the supplementary crystallographic data. This information can be obtained free of charge via <https://www.ccdc.cam.ac.uk/structures/>

**Table 1:** X-ray diffraction crystal data, data collection and structure refinement for the compound (*rac*)-**4a**.

| Compound                                   | ( <i>rac</i> )- <b>4a</b>                          |
|--------------------------------------------|----------------------------------------------------|
| Empirical formula                          | C <sub>20</sub> H <sub>21</sub> NO <sub>4</sub> Se |
| Formula weight (g·mol <sup>-1</sup> )      | 418.34                                             |
| Crystal system                             | triclinic                                          |
| Space group                                | $P\bar{1}$                                         |
| Temp (K)                                   | 293                                                |
| <i>a</i> (Å)                               | 9.198(5)                                           |
| <i>b</i> (Å)                               | 10.355(7)                                          |
| <i>c</i> (Å)                               | 12.174(7)                                          |
| $\alpha$ (°)                               | 69.365(16)                                         |
| $\beta$ (°)                                | 76.44(2)                                           |
| $\gamma$ (°)                               | 64.56(2)                                           |
| <i>V</i> (Å <sup>3</sup> )                 | 975.2(10)                                          |
| <i>Z</i>                                   | 2                                                  |
| $\rho_{\text{calc}}$ (g·cm <sup>-3</sup> ) | 1.425                                              |
| Reflns collected                           | 60514                                              |
| Indep. reflns                              | 3429                                               |
| Obs. reflns [ $I > 2\sigma(I)$ ]           | 3176                                               |
| Param. refin./restr.                       | 238 / 0                                            |
| Absorption correction                      | multi-scan                                         |
| <i>R</i> <sub>1</sub>                      | 0.027                                              |

<sup>6</sup> Sheldrick, GM (1997) SHELXS-97, Program for the Solution of Crystal Structures, Göttingen, Germany. See also: Sheldrick, GM (1990) Acta Crystallogr A 46:467.

<sup>7</sup> Sheldrick, GM (2015) Acta Crystallogr A 71:3.

| Compound | ( <i>rac</i> )-4a |
|----------|-------------------|
| $wR_2$   | 0.075             |
| CCDC     | 2121570           |

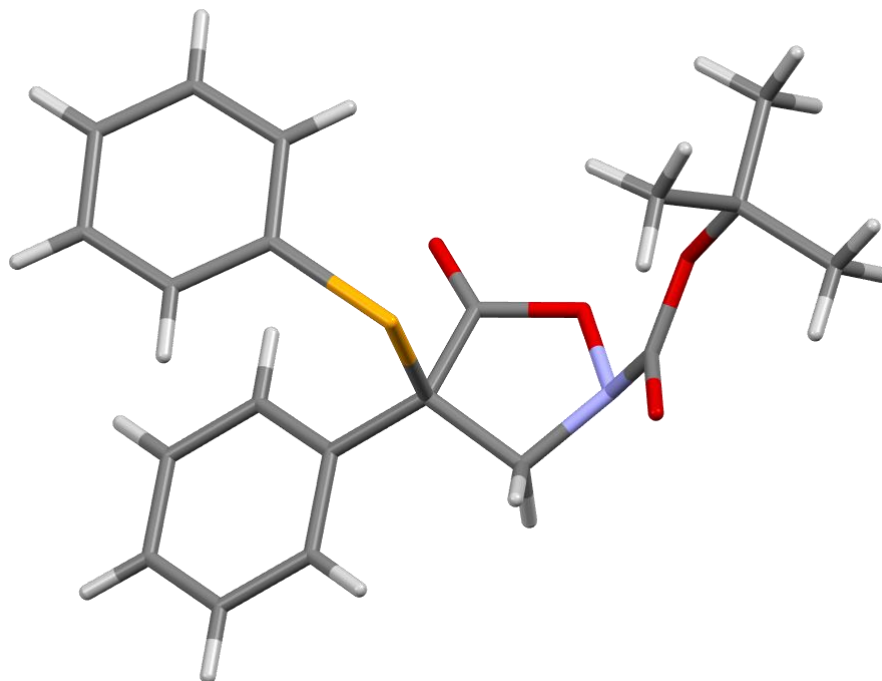

**Figure 1:** Single crystal structure of (*rac*)-4a.

## 9. NMR Spectra of Selenation Products

### NMR spectra of compound **3a**

$^1\text{H}$ -NMR (300 MHz,  $\text{CDCl}_3$ , 298 K)

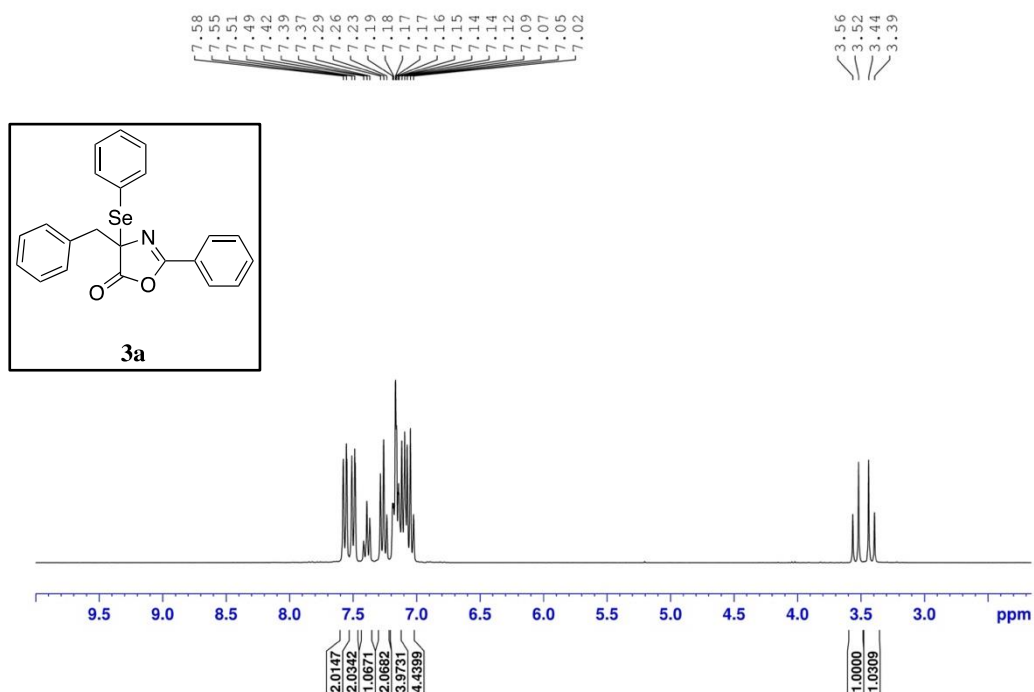

$^{13}\text{C}$ -NMR (75 MHz,  $\text{CDCl}_3$ , 298 K)

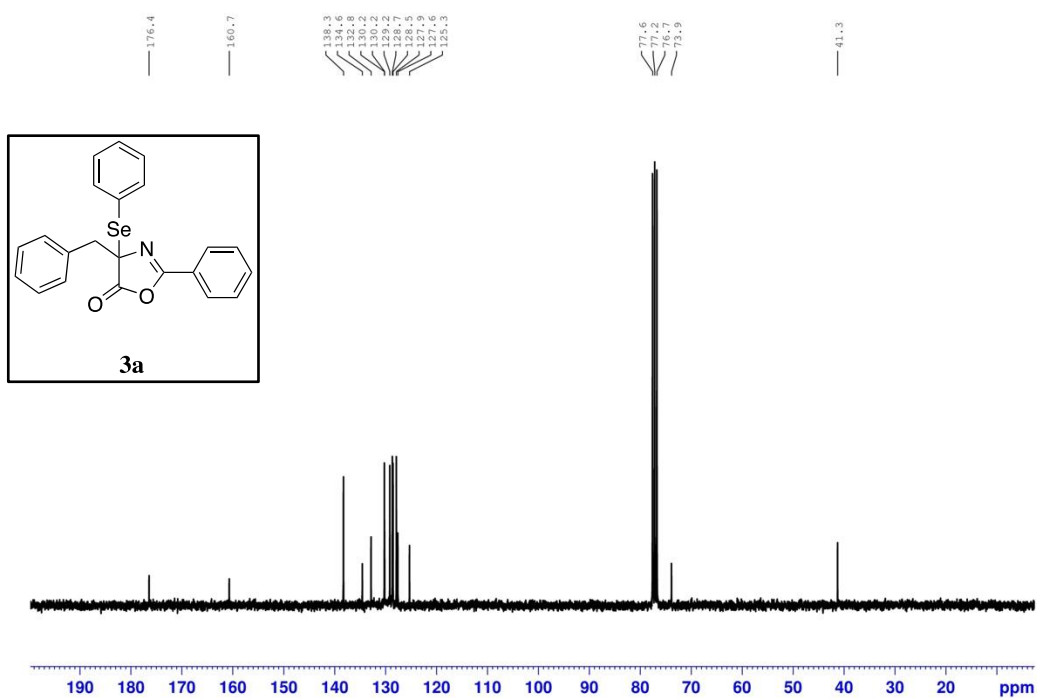

**NMR spectra of compound 3c** **$^1\text{H}$ -NMR** (700 MHz,  $\text{CDCl}_3$ , 298 K)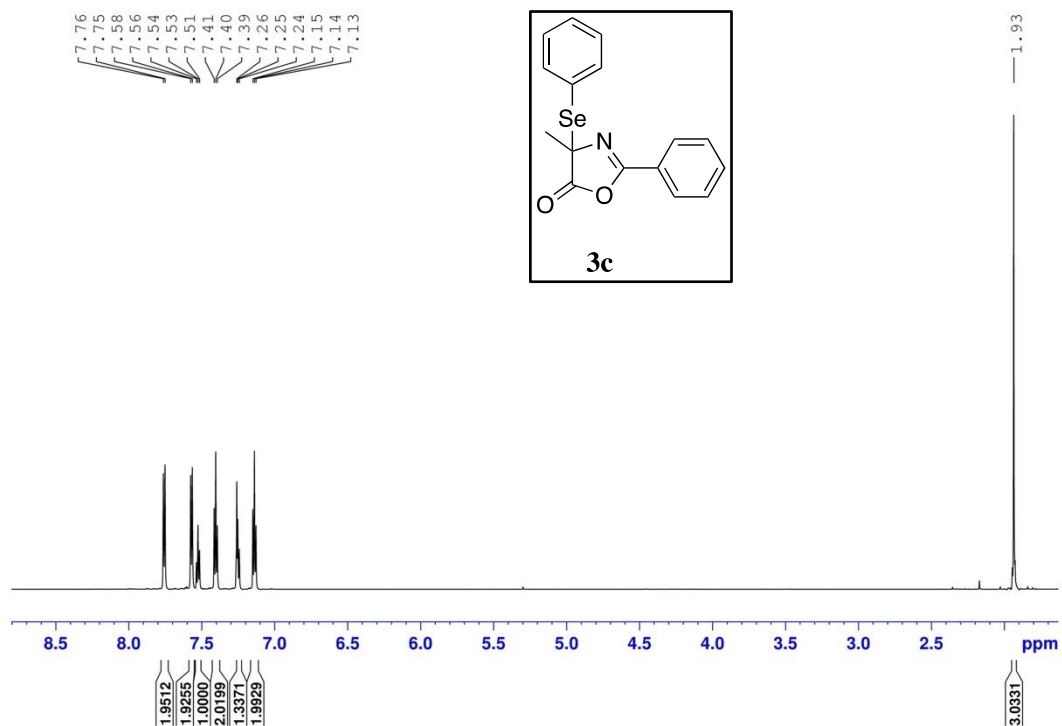 **$^{13}\text{C}$ -NMR** (176 MHz,  $\text{CDCl}_3$ , 298 K)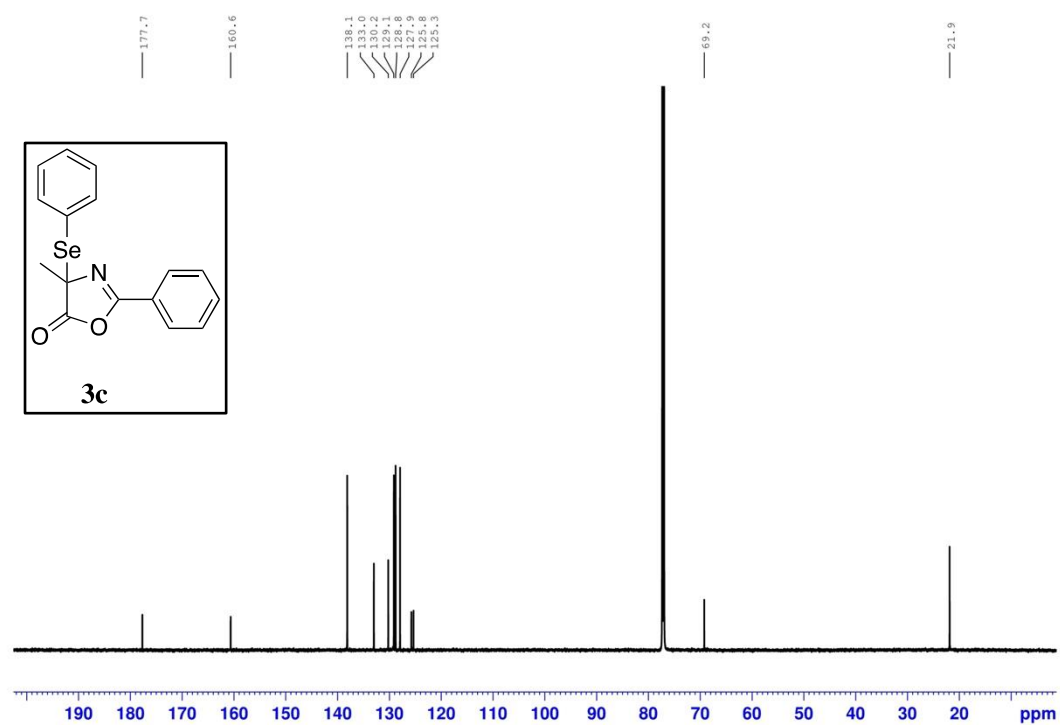

**NMR spectra of compound 3d** **$^1\text{H}$ -NMR** (500 MHz,  $\text{CDCl}_3$ , 298 K)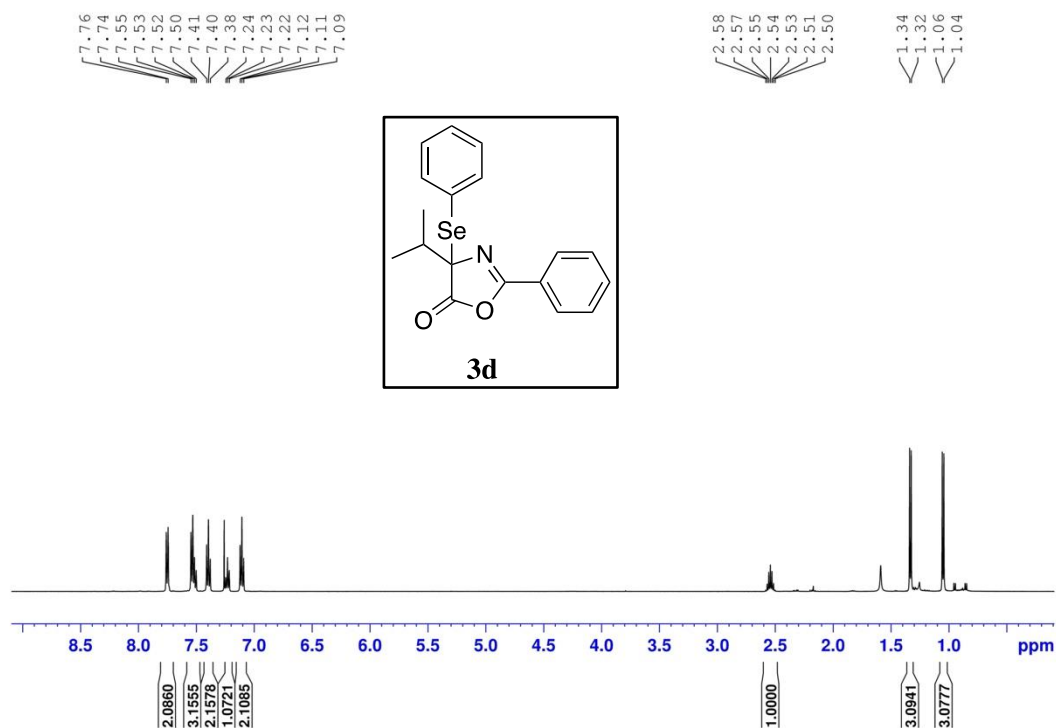 **$^{13}\text{C}$ -NMR** (126 MHz,  $\text{CDCl}_3$ , 298 K)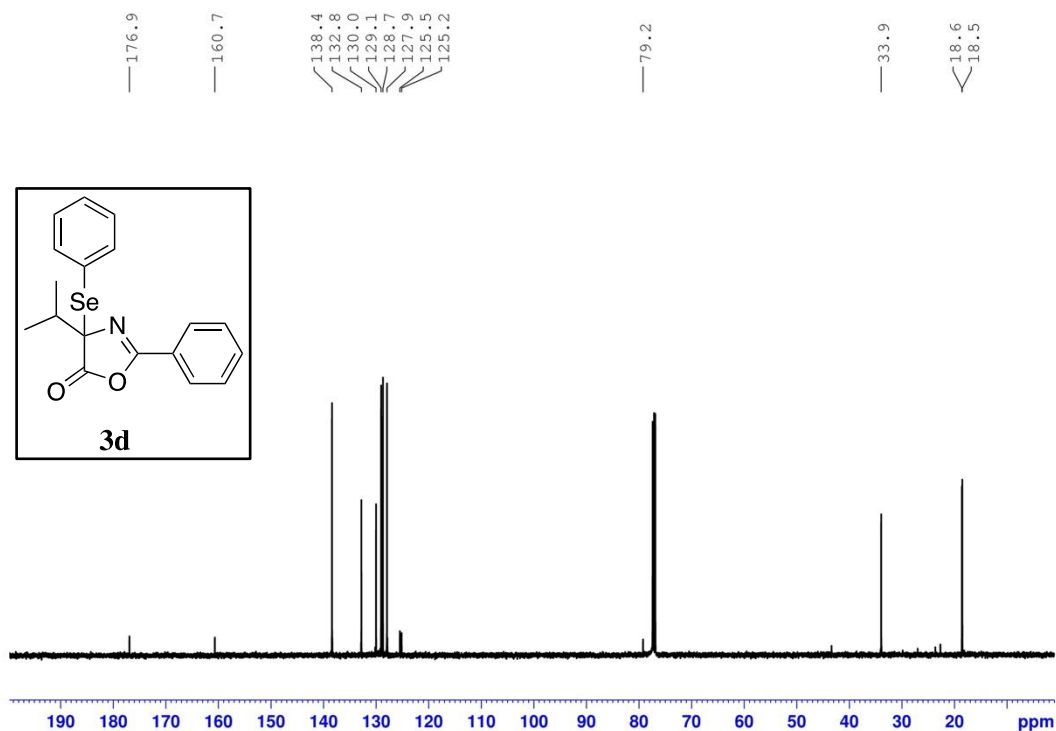

**NMR spectra of compound 3e** **$^1\text{H}$ -NMR** (500 MHz,  $\text{CDCl}_3$ , 298 K)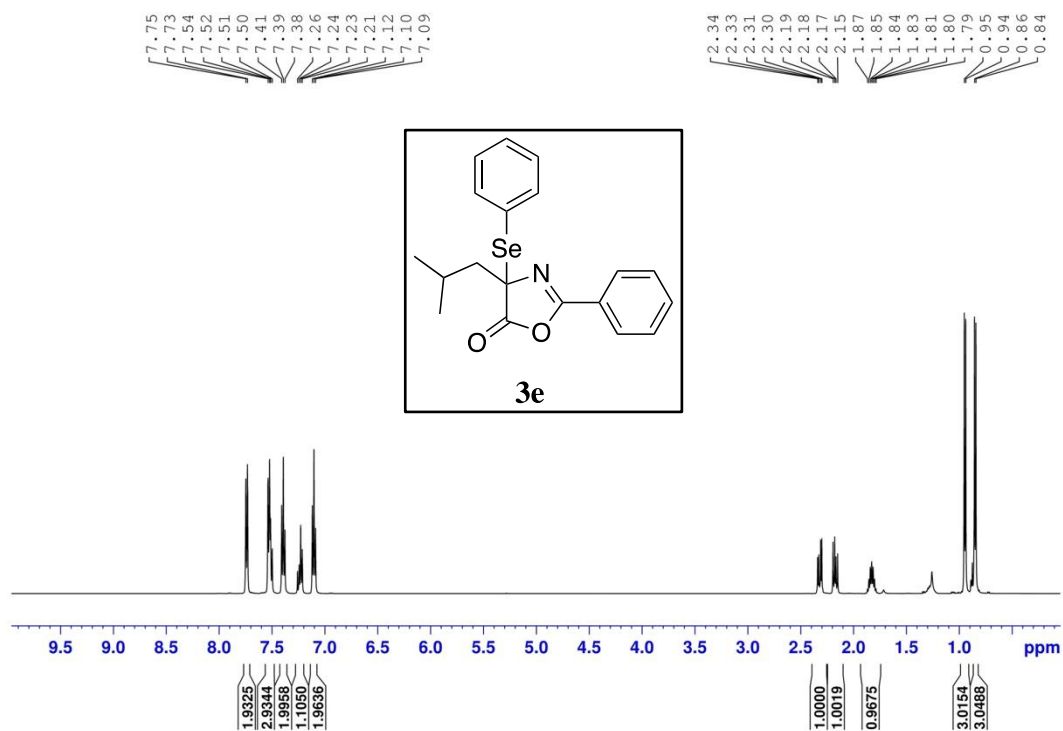 **$^{13}\text{C}$ -NMR** (126 MHz,  $\text{CDCl}_3$ , 298 K)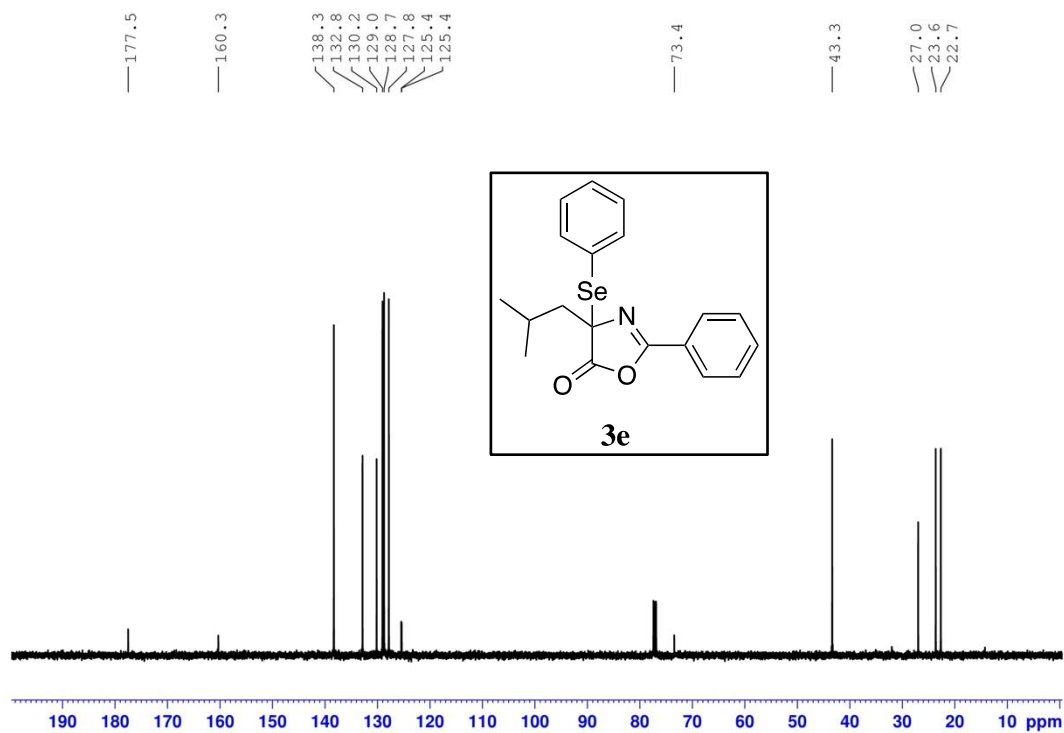

**NMR spectra of compound 3f** **$^1\text{H}$ -NMR** (300 MHz,  $\text{CDCl}_3$ , 298 K)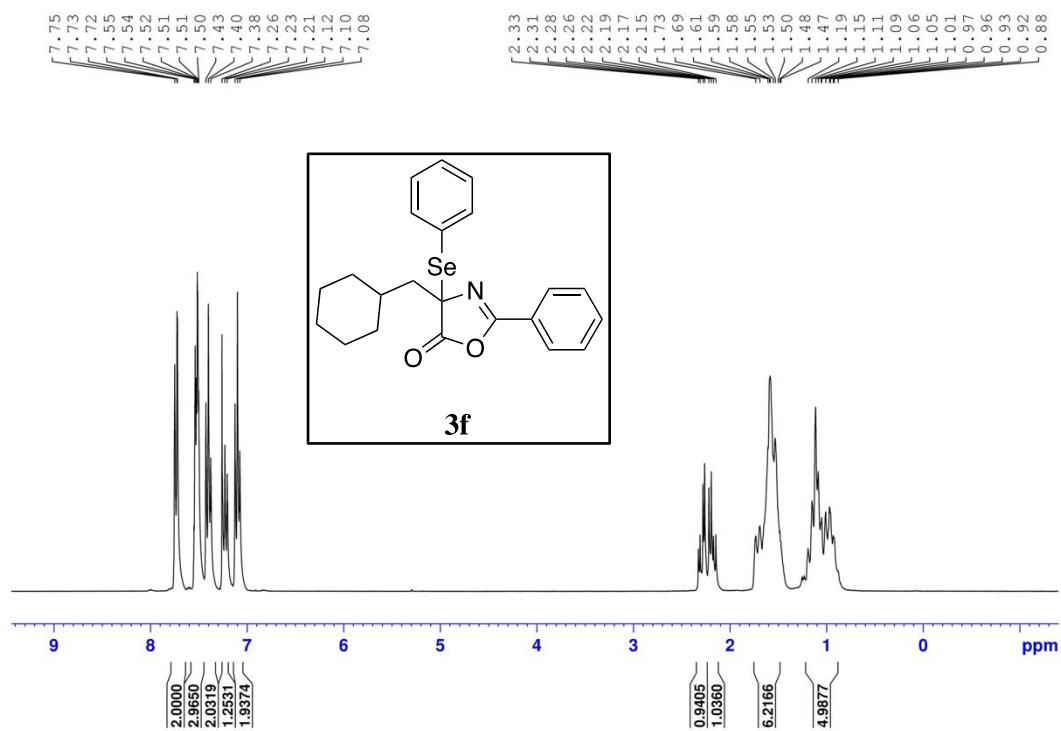 **$^{13}\text{C}$ -NMR** (75 MHz,  $\text{CDCl}_3$ , 298 K)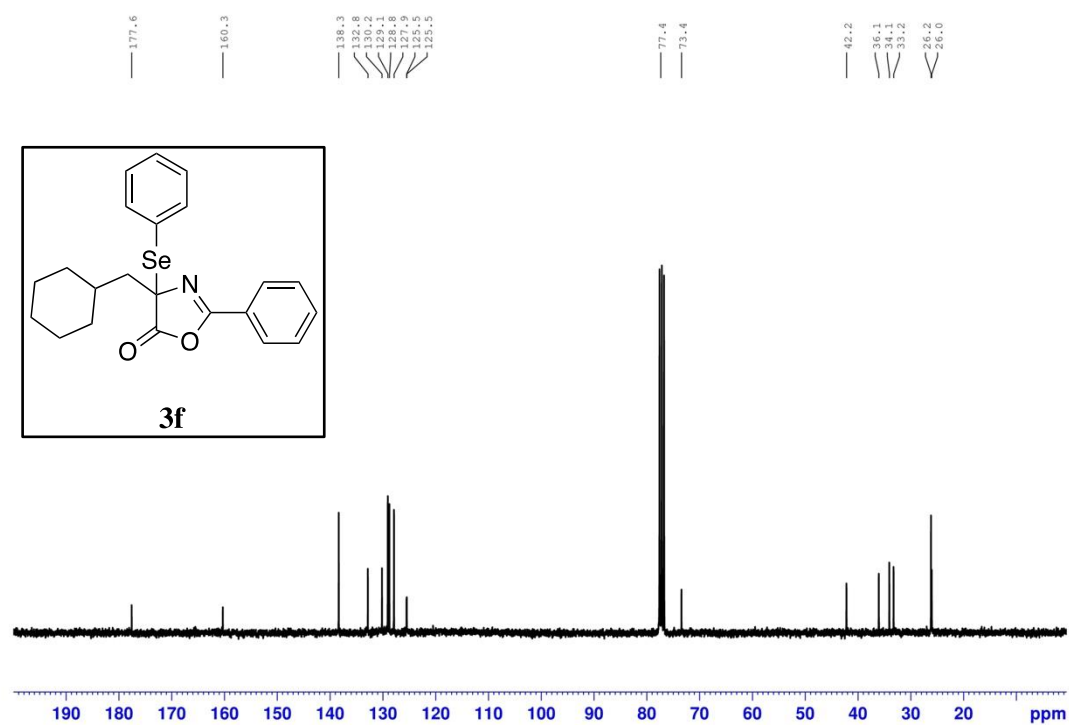

**NMR spectra of compound **3g**** **$^1\text{H}$ -NMR** (300 MHz,  $\text{CDCl}_3$ , 298 K)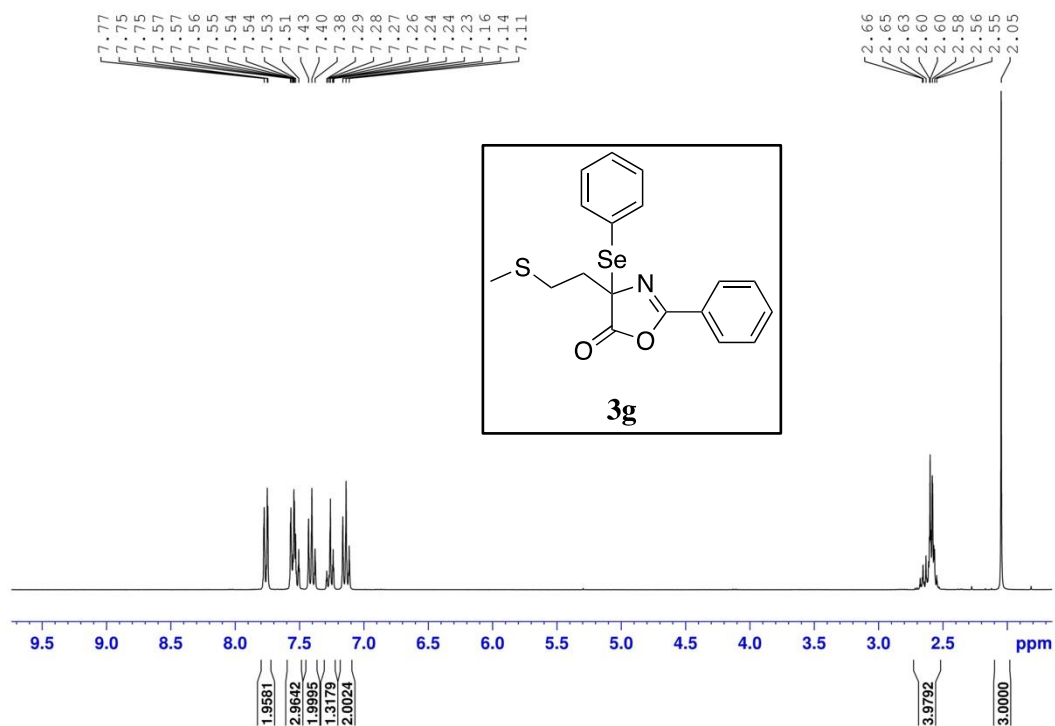 **$^{13}\text{C}$ -NMR** (75 MHz,  $\text{CDCl}_3$ , 298 K)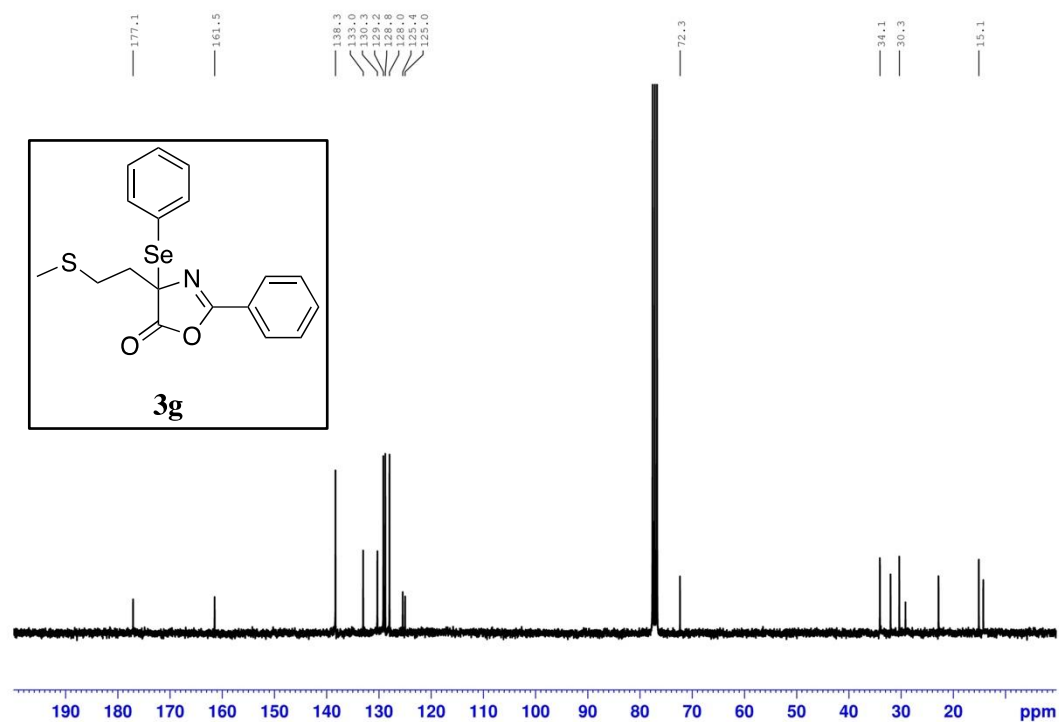

**NMR spectra of compound 3h** **$^1\text{H}$ -NMR** (300 MHz,  $\text{CDCl}_3$ , 298 K)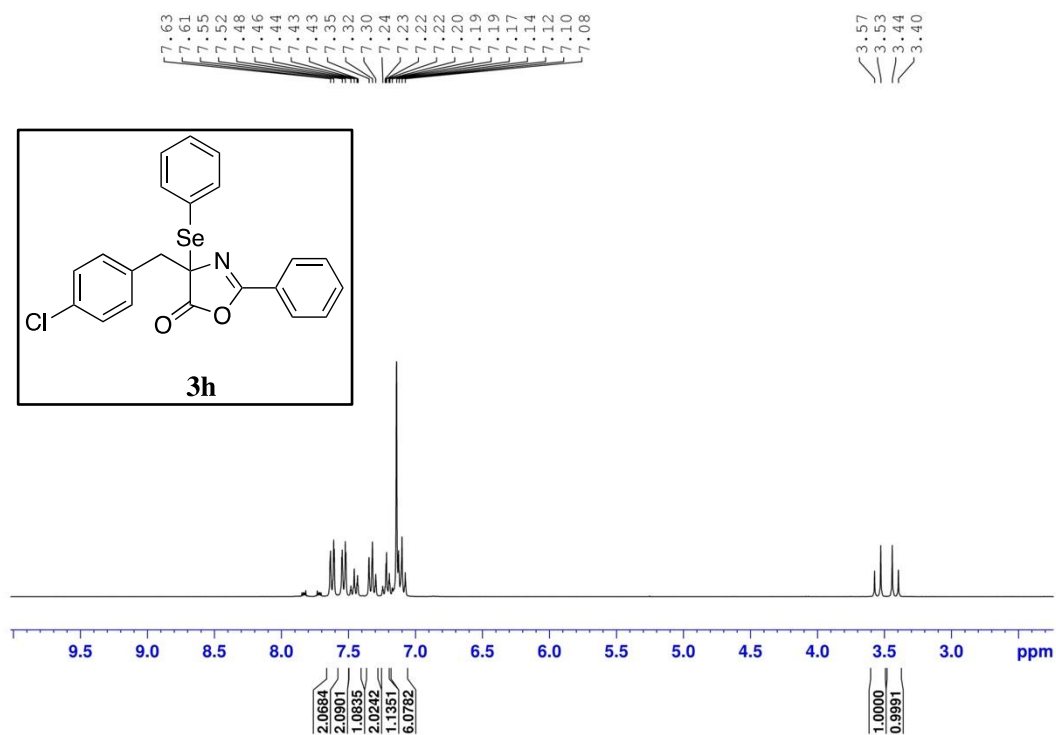 **$^{13}\text{C}$ -NMR** (75 MHz,  $\text{CDCl}_3$ , 298 K)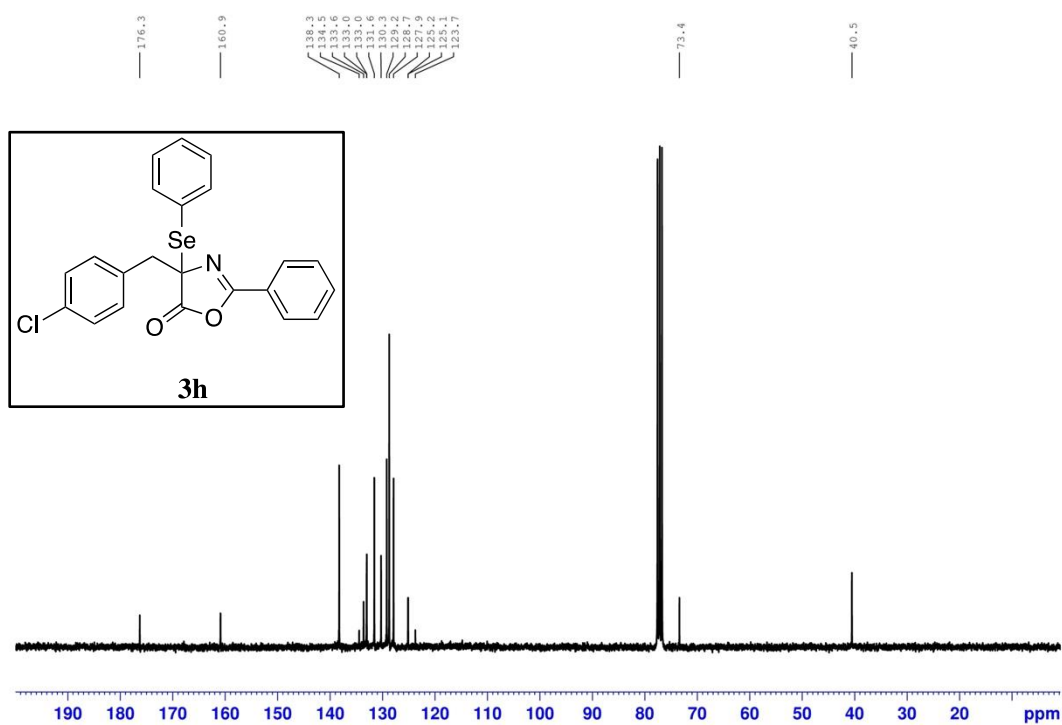

**NMR spectra of compound 3i** **$^1\text{H}$ -NMR** (300 MHz,  $\text{CDCl}_3$ , 298 K)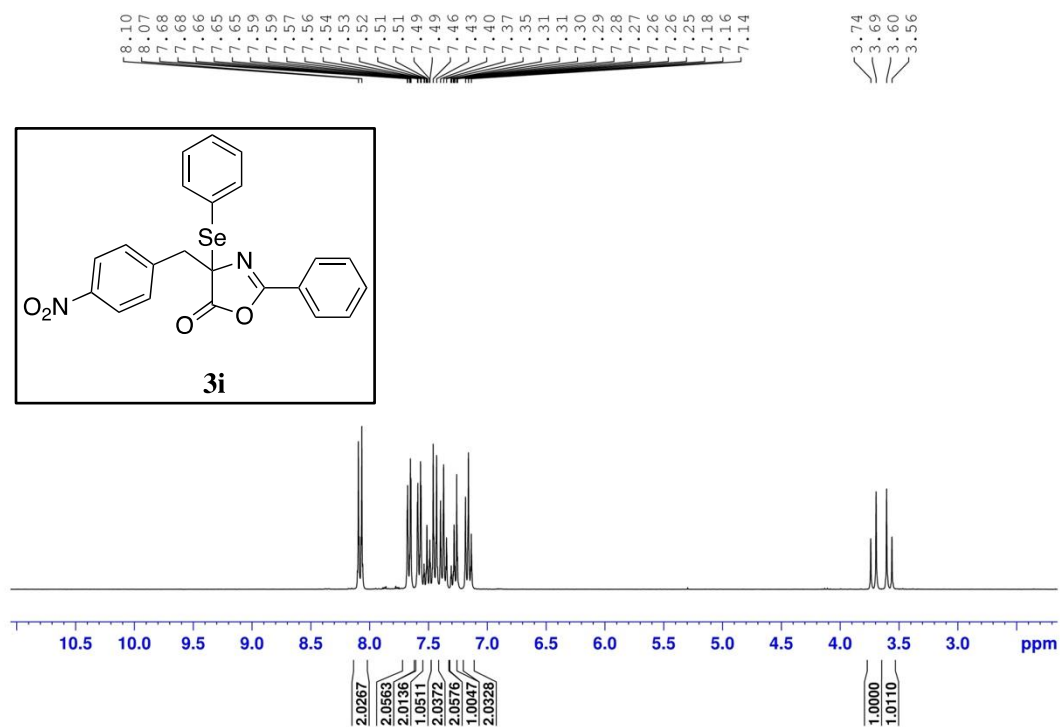 **$^{13}\text{C}$ -NMR** (75 MHz,  $\text{CDCl}_3$ , 298 K)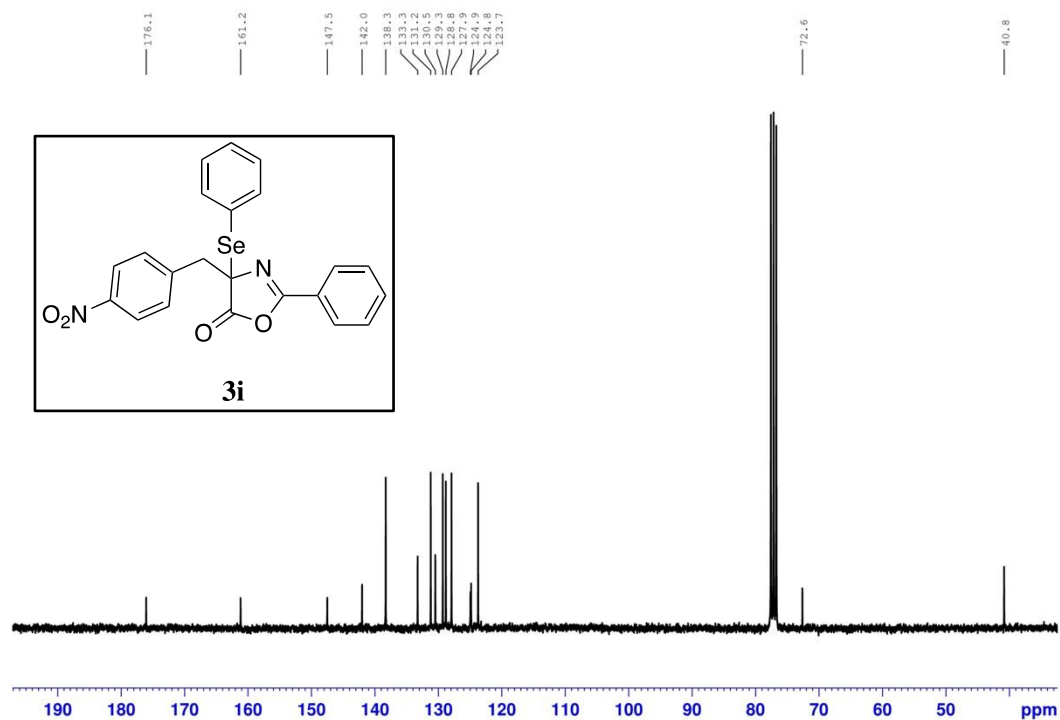



**$^{19}\text{F}$ -NMR** (471 MHz,  $\text{CDCl}_3$ , 298 K)

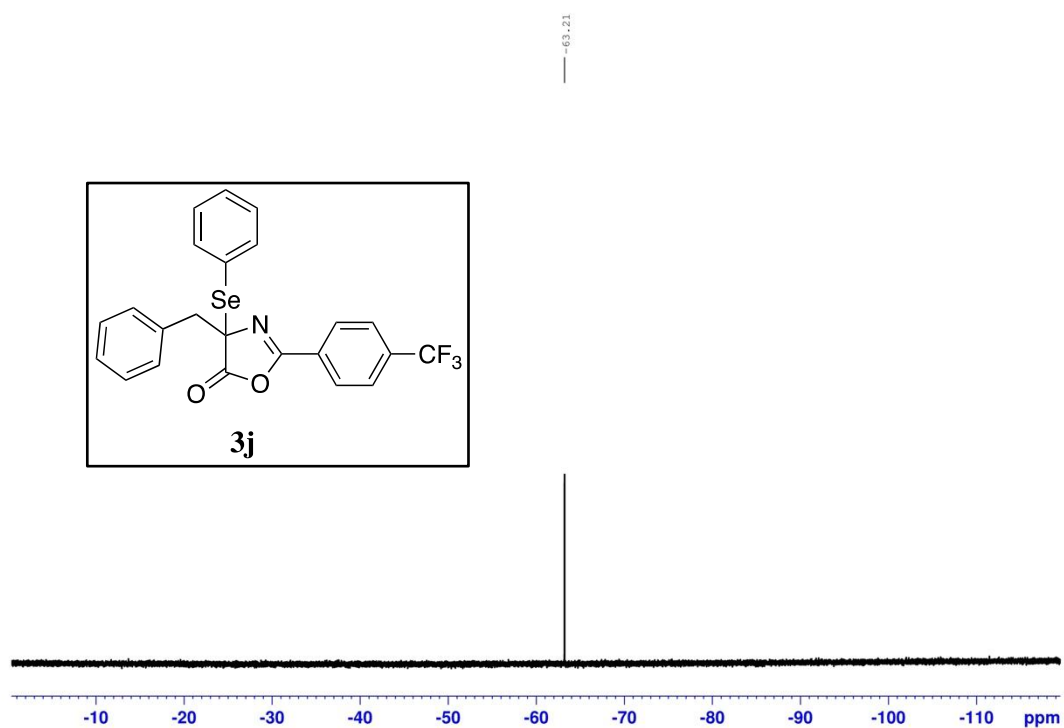

**NMR spectra of compound 3k** **$^1\text{H}$ -NMR** (300 MHz,  $\text{CDCl}_3$ , 298 K)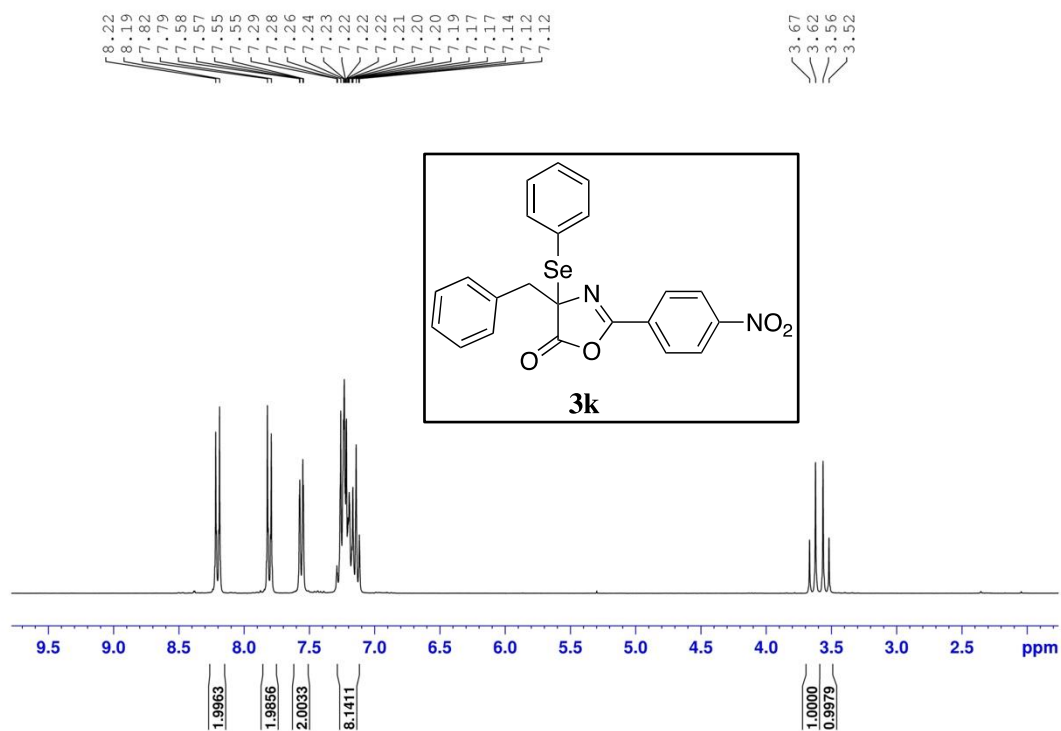 **$^{13}\text{C}$ -NMR** (75 MHz,  $\text{CDCl}_3$ , 298 K)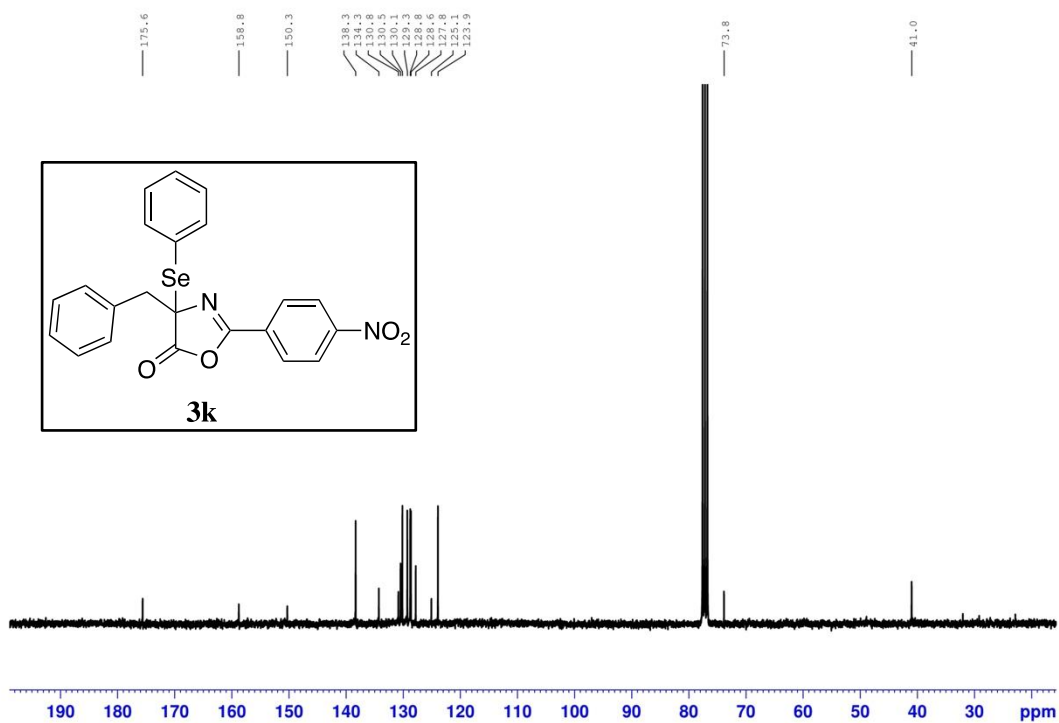

**NMR spectra of compound 3I** **$^1\text{H}$ -NMR** (300 MHz,  $\text{CDCl}_3$ , 298 K)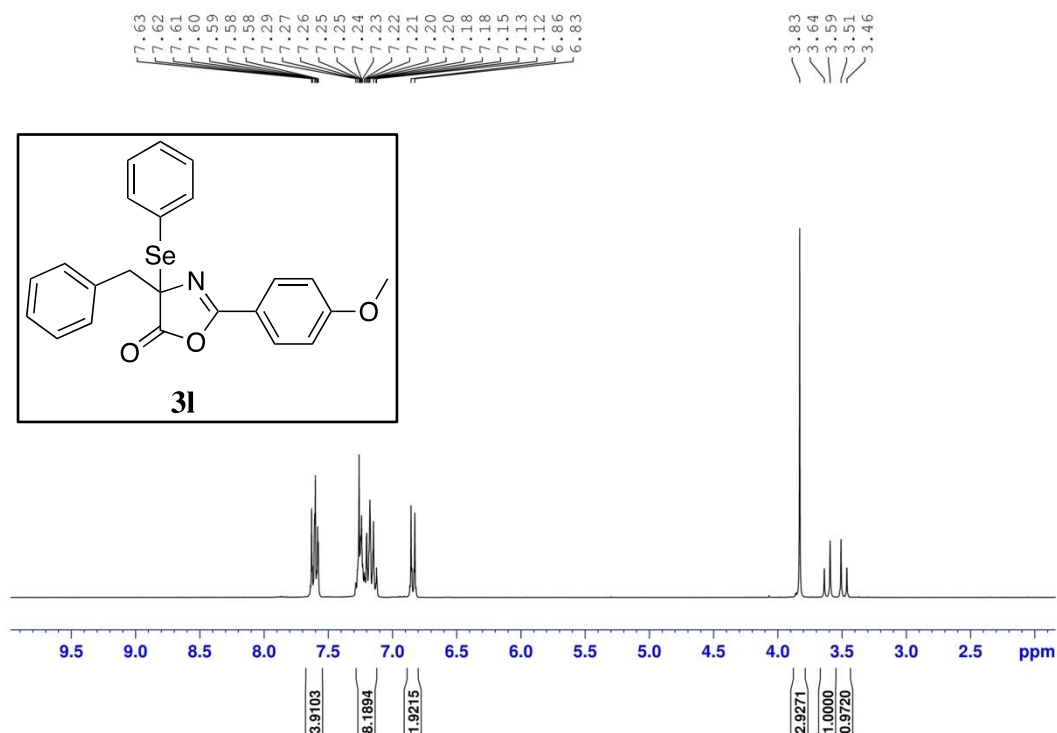 **$^{13}\text{C}$ -NMR** (75 MHz,  $\text{CDCl}_3$ , 298 K)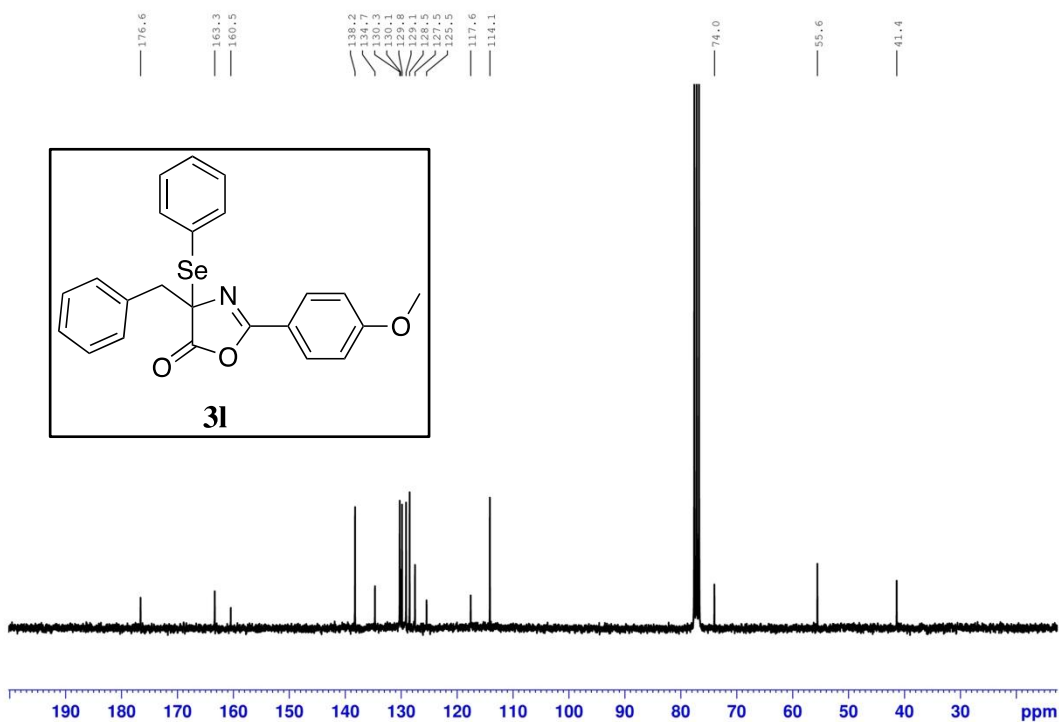

**NMR spectra of compound 3m** **$^1\text{H}$ -NMR** (300 MHz,  $\text{CDCl}_3$ , 298 K)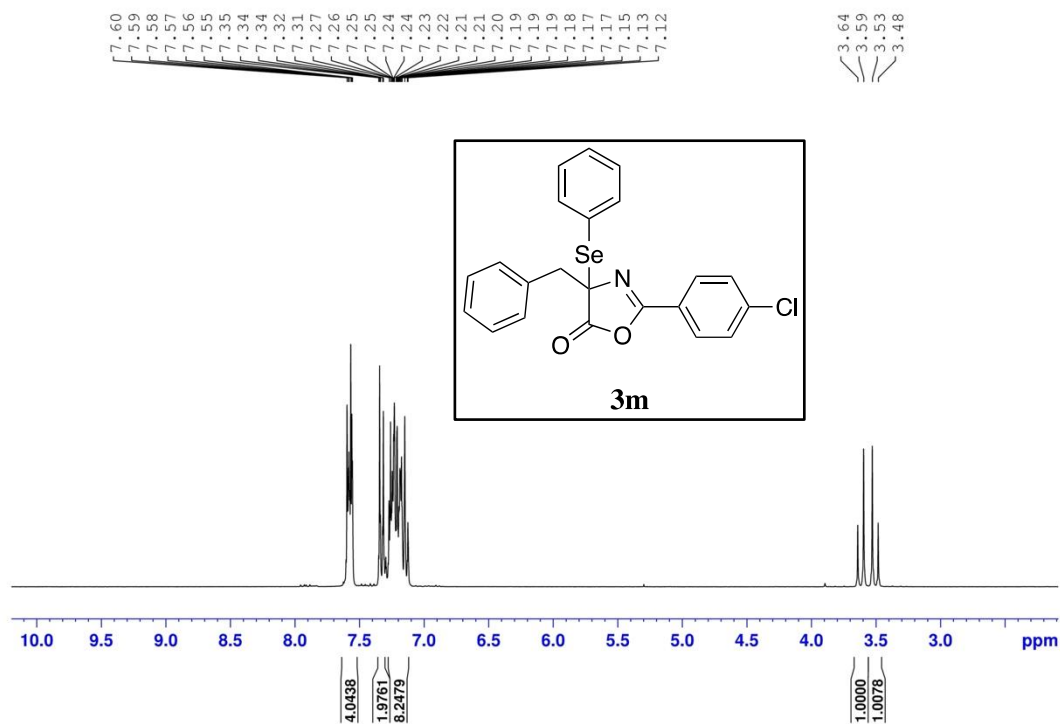 **$^{13}\text{C}$ -NMR** (75 MHz,  $\text{CDCl}_3$ , 298 K)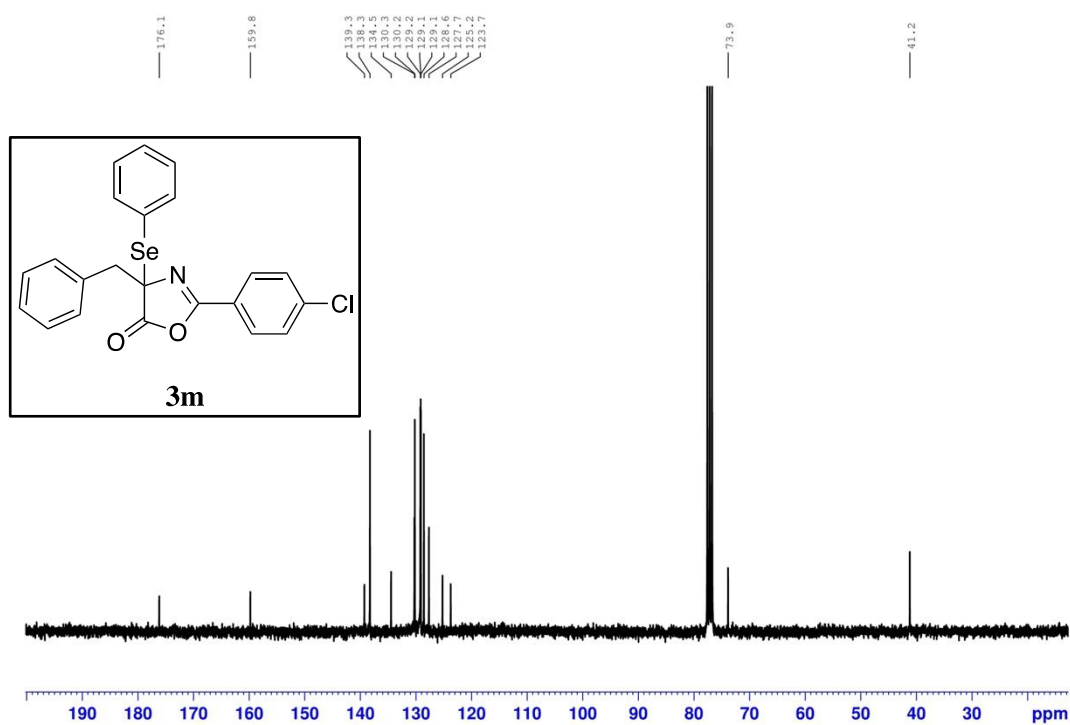

**NMR spectra of compound 3n** **$^1\text{H}$ -NMR** (300 MHz,  $\text{CDCl}_3$ , 298 K)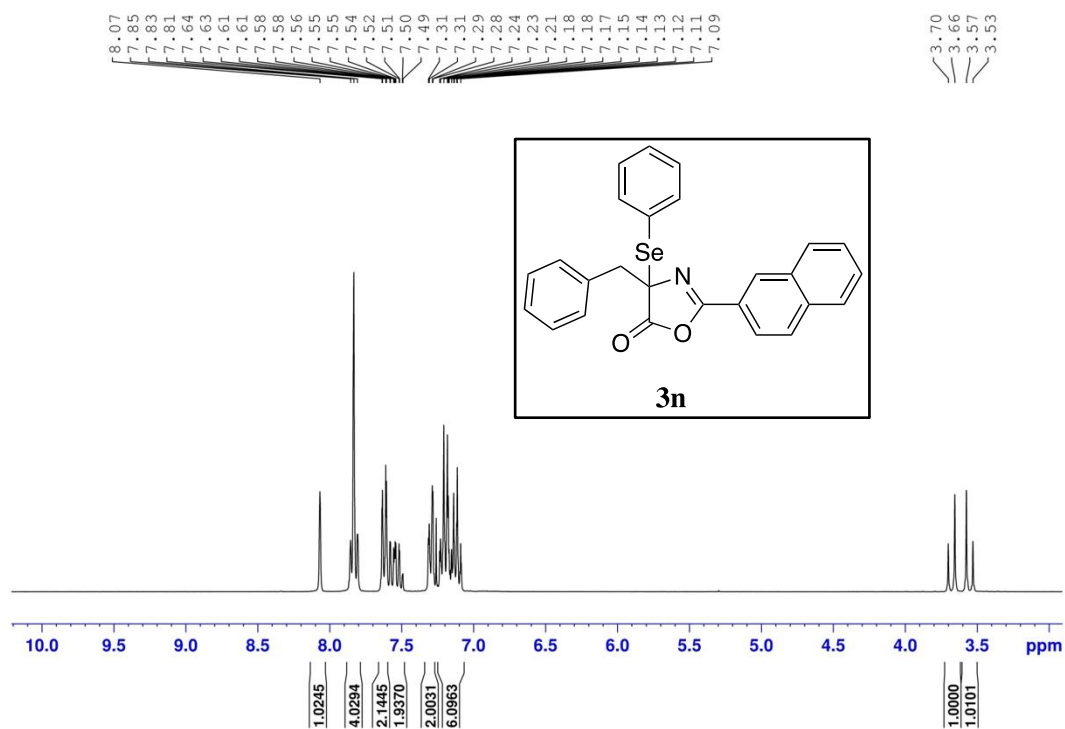 **$^{13}\text{C}$ -NMR** (75 MHz,  $\text{CDCl}_3$ , 298 K)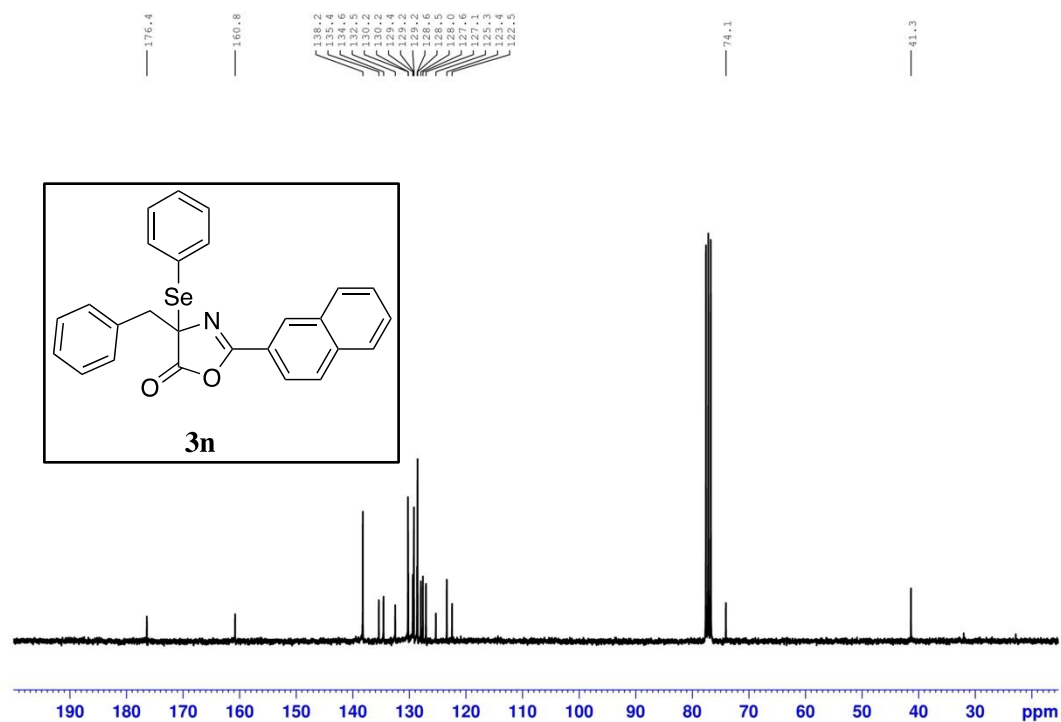

**NMR spectra of compound 3o** **$^1\text{H}$ -NMR** (500 MHz,  $\text{CDCl}_3$ , 298 K)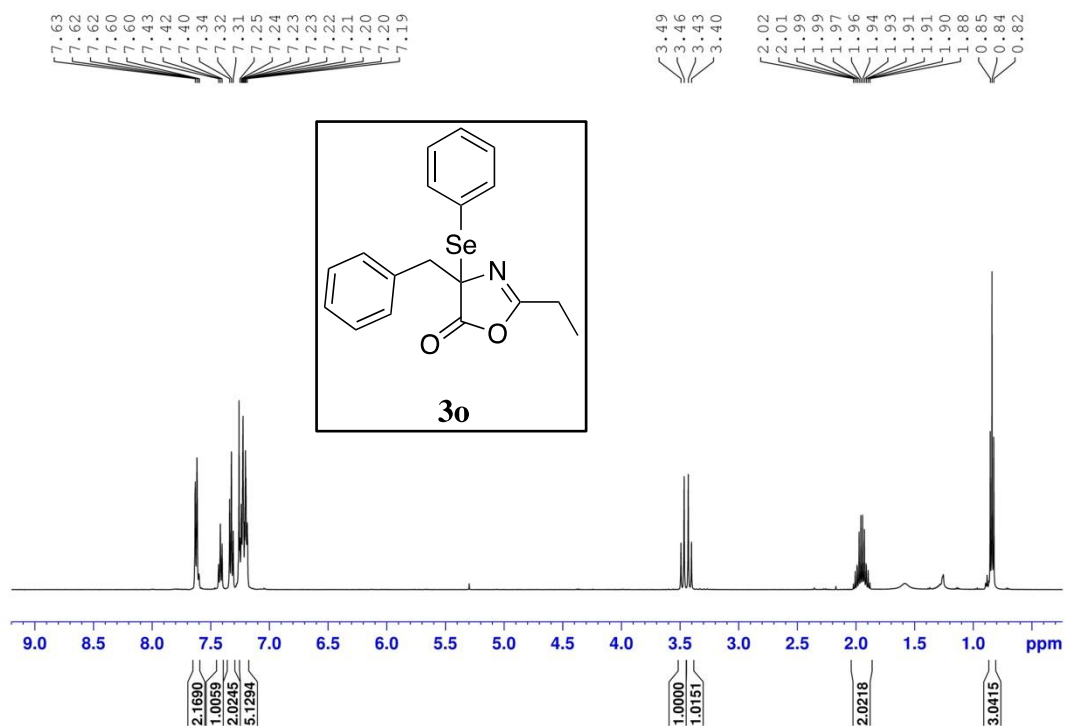 **$^{13}\text{C}$ -NMR** (126 MHz,  $\text{CDCl}_3$ , 298 K)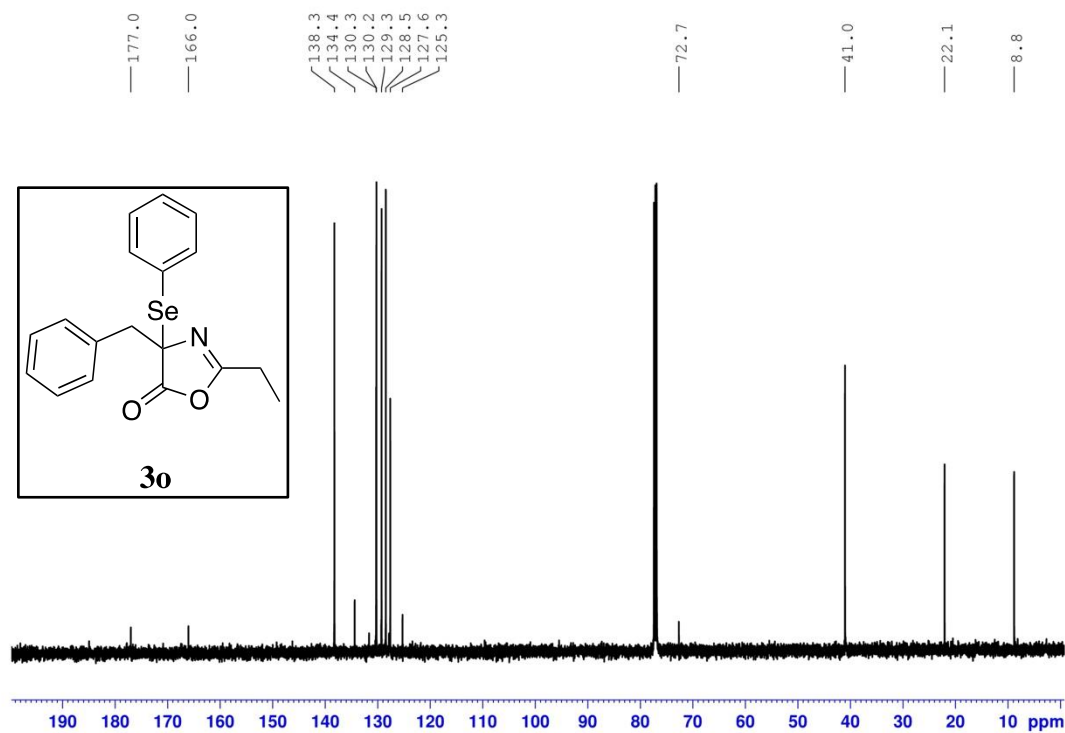

**NMR spectra of compound 3p** **$^1\text{H}$ -NMR (500 MHz,  $\text{CDCl}_3$ , 298 K)**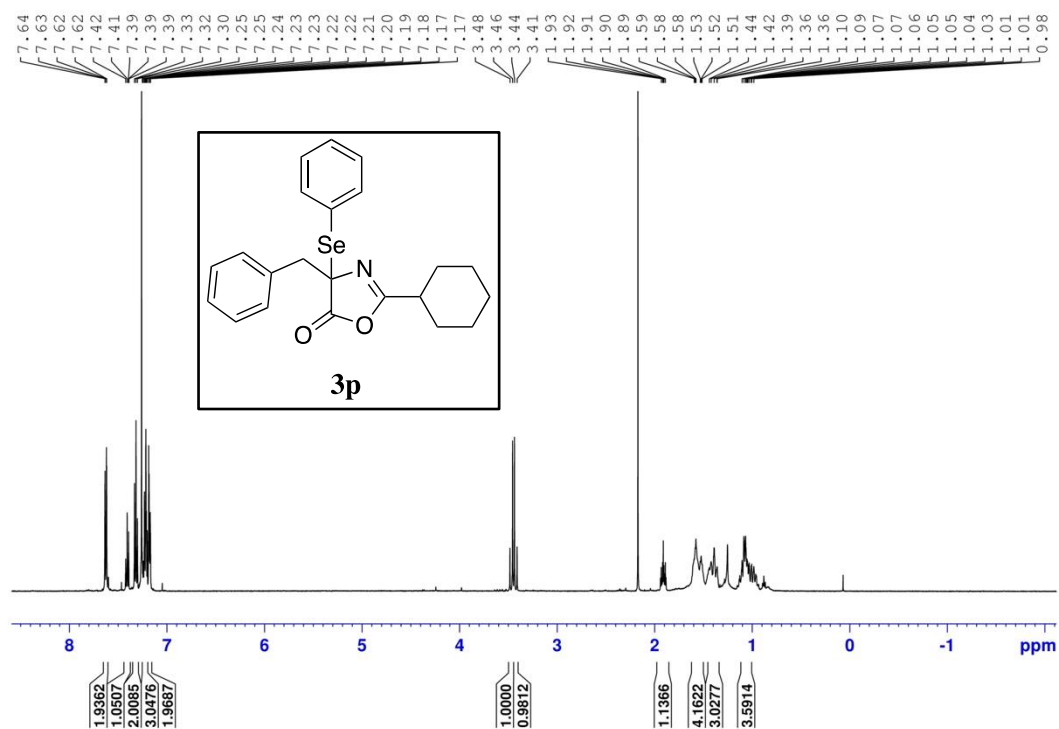

**NMR spectra of compound 3q** **$^1\text{H}$ -NMR** (300 MHz,  $\text{CDCl}_3$ , 298 K)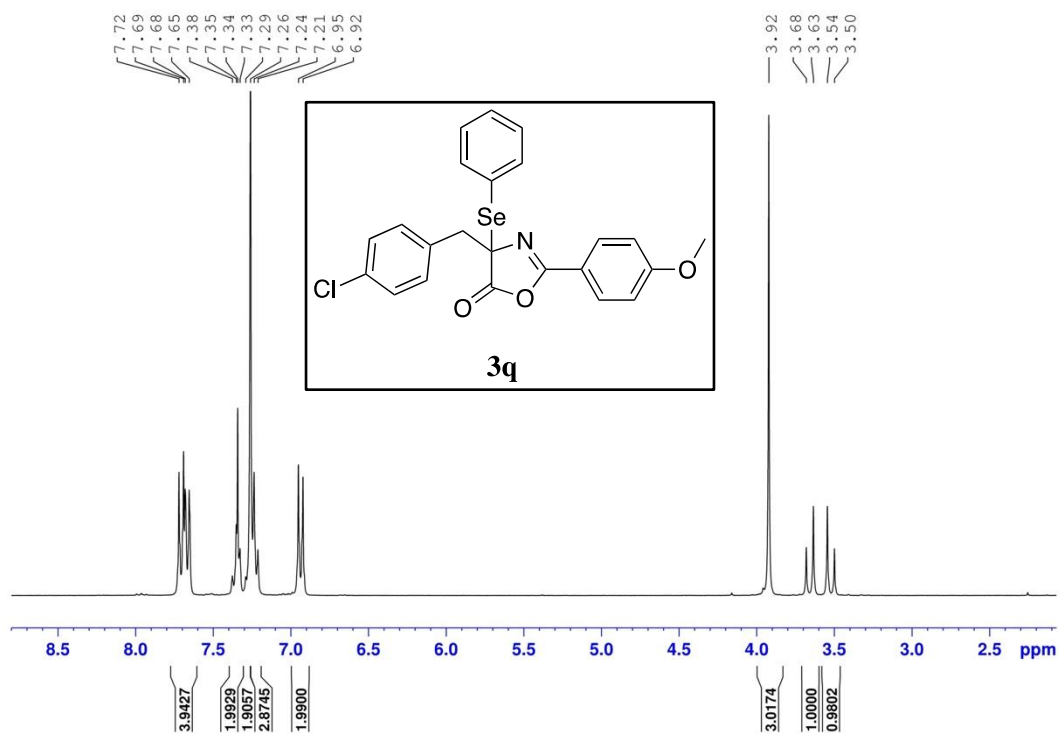 **$^{13}\text{C}$ -NMR** (75 MHz,  $\text{CDCl}_3$ , 298 K)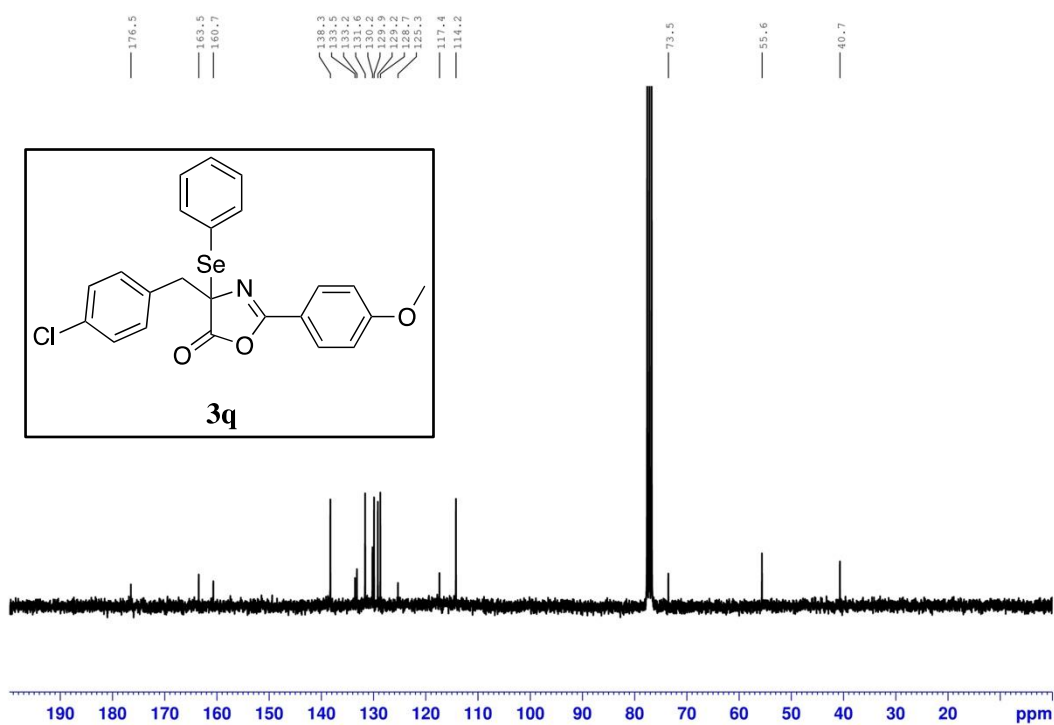

**NMR spectra of compound 3r** **$^1\text{H}$ -NMR** (300 MHz,  $\text{CDCl}_3$ , 298 K)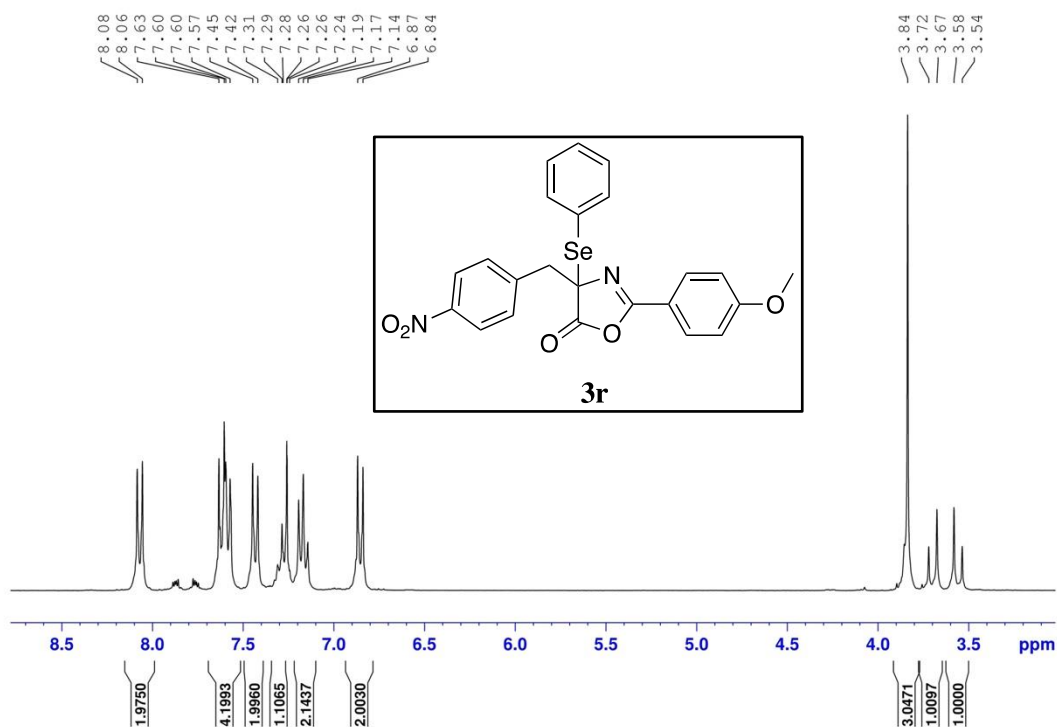 **$^{13}\text{C}$ -NMR** (75 MHz,  $\text{CDCl}_3$ , 298 K)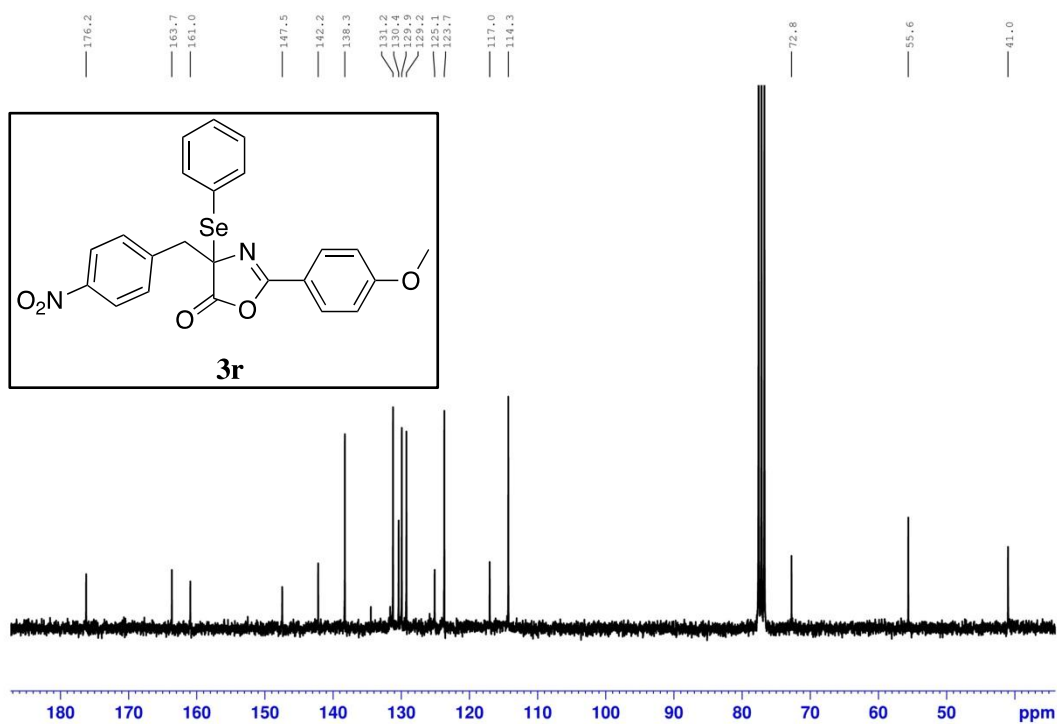

**NMR spectra of compound 3s** **$^1\text{H}$ -NMR (300 MHz,  $\text{CDCl}_3$ , 298 K)**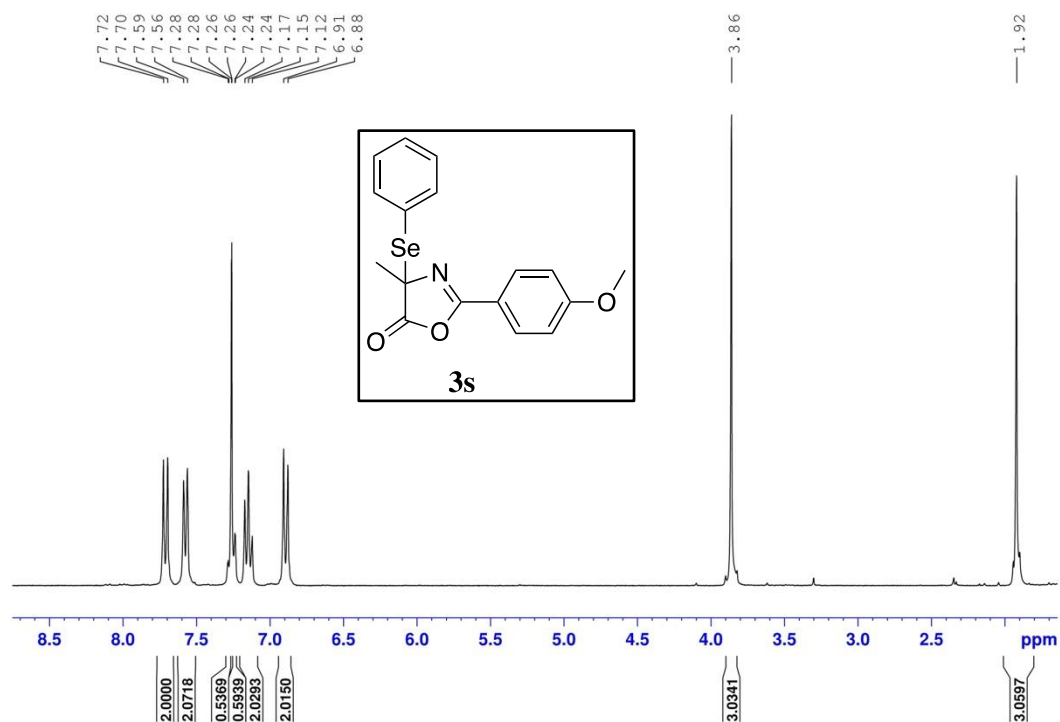

**NMR spectra of compound 3t** **$^1\text{H}$ -NMR** (300 MHz,  $\text{CDCl}_3$ , 298 K)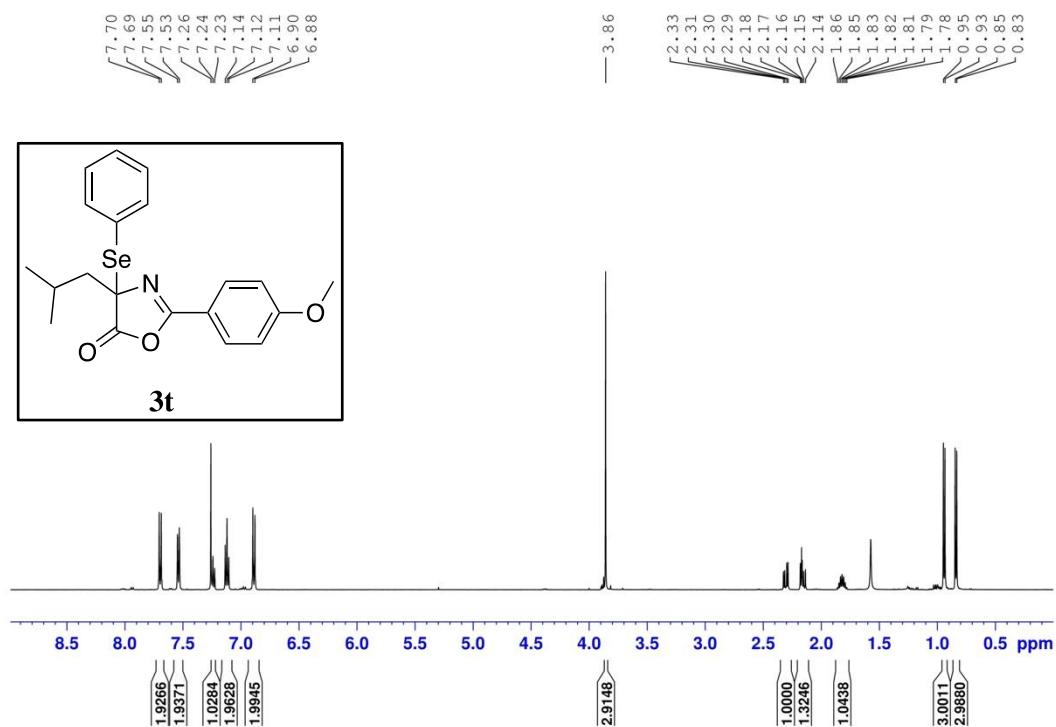 **$^{13}\text{C}$ -NMR** (126 MHz,  $\text{CDCl}_3$ , 298 K)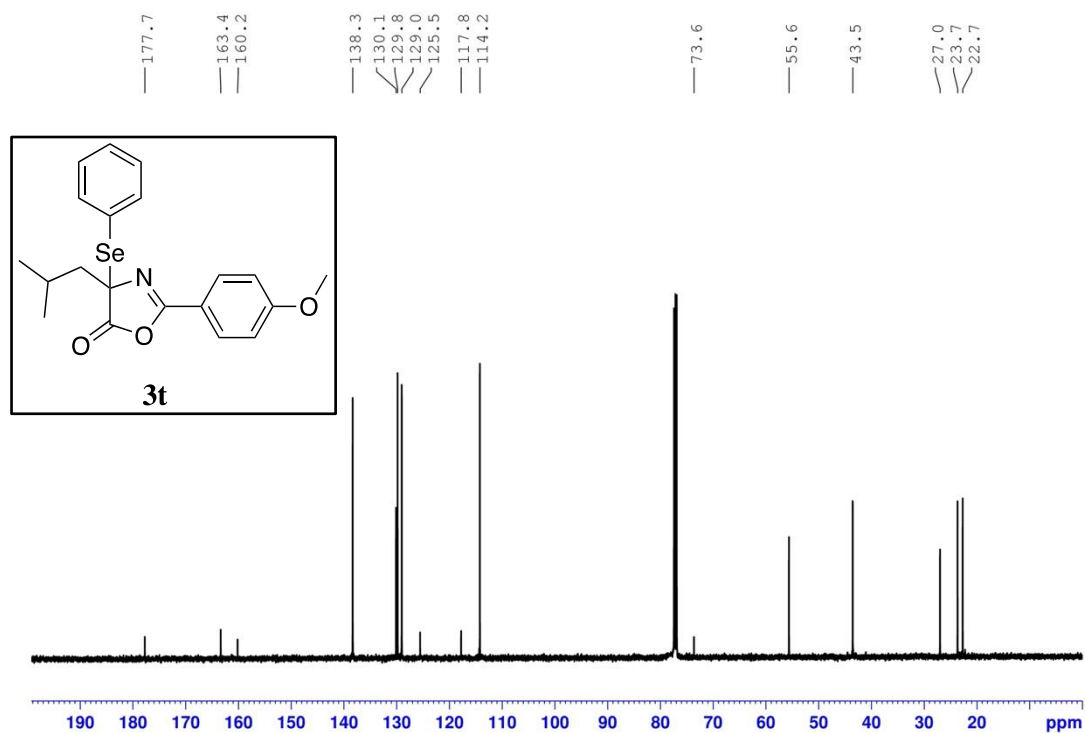

**NMR spectra of compound 3u** **$^1\text{H}$ -NMR (300 MHz,  $\text{CDCl}_3$ , 298 K)**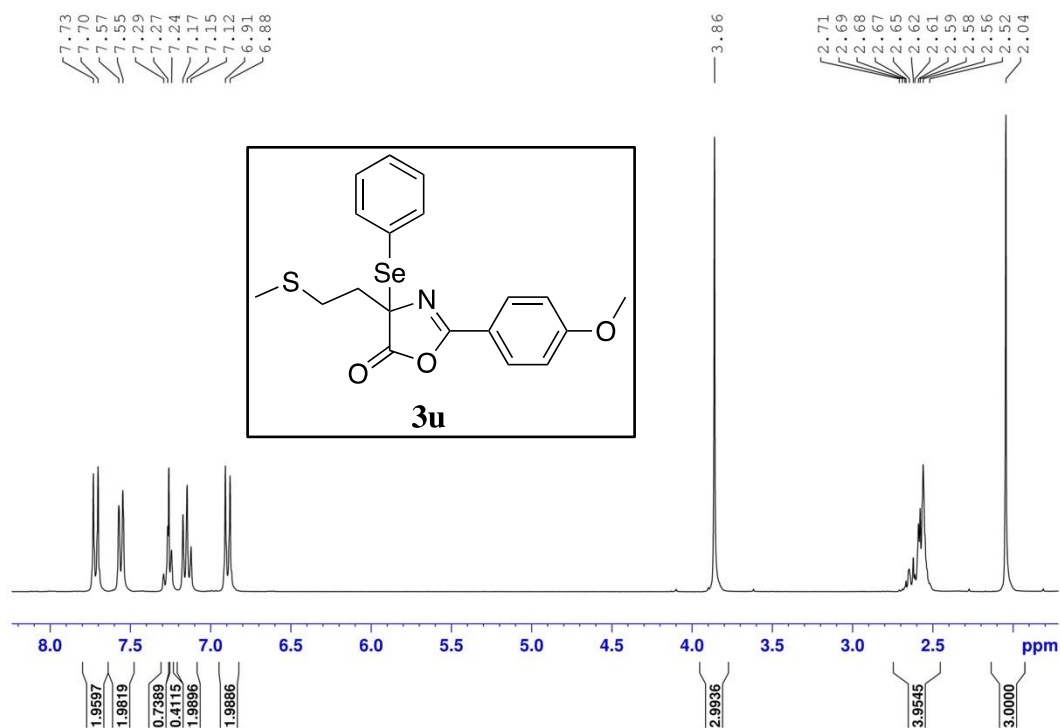 **$^{13}\text{C}$ -NMR (75 MHz,  $\text{CDCl}_3$ , 298 K)**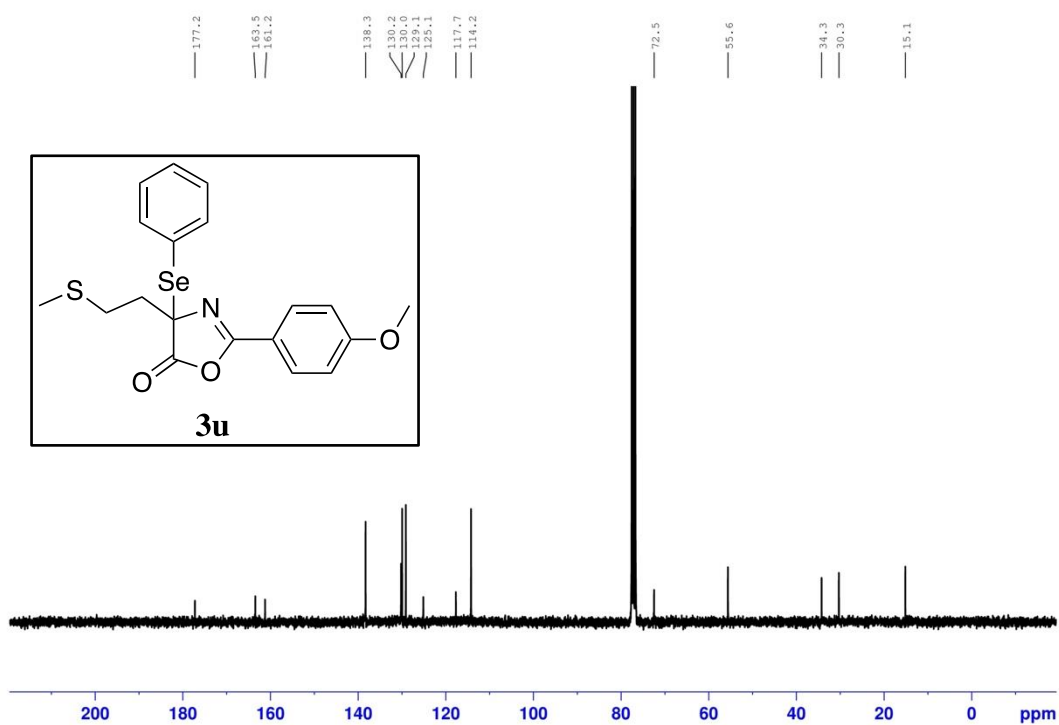

**NMR spectra of compound 3v** **$^1\text{H}$ -NMR** (300 MHz,  $\text{CDCl}_3$ , 298 K)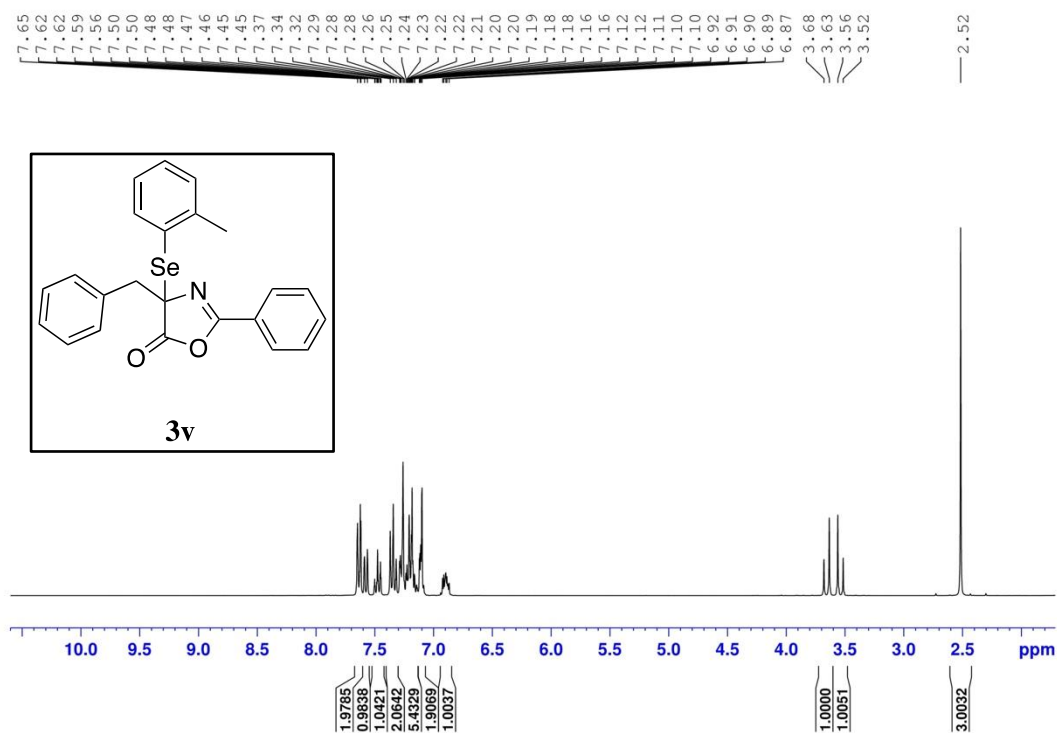 **$^{13}\text{C}$ -NMR** (75 MHz,  $\text{CDCl}_3$ , 298 K)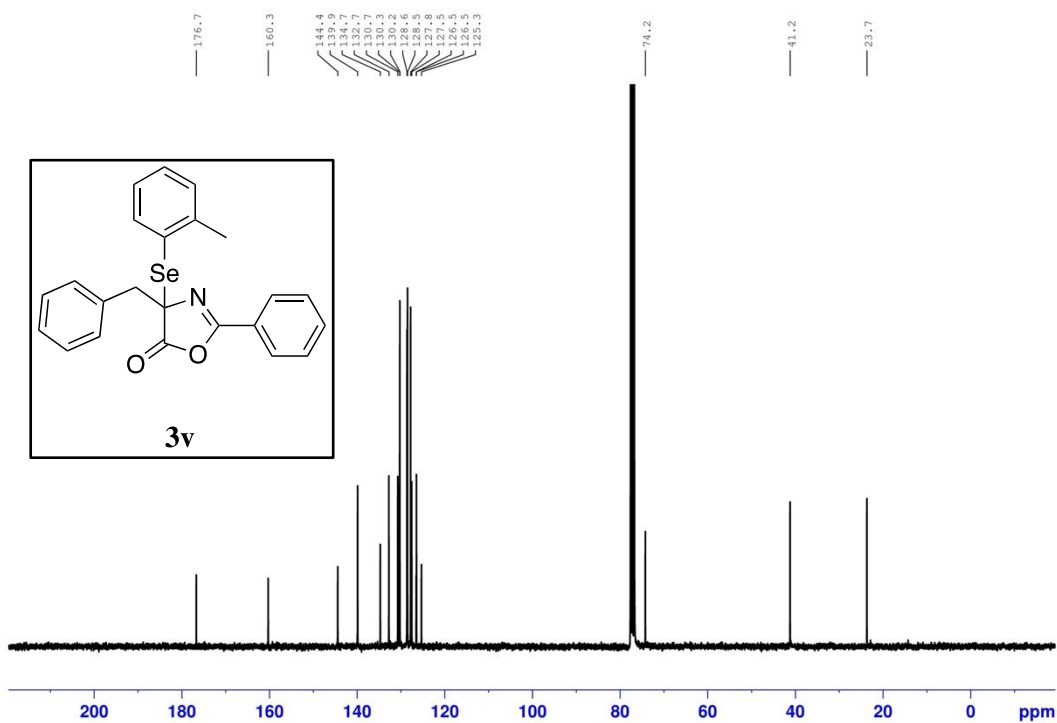

**NMR spectra of compound 3w** **$^1\text{H}$ -NMR (300 MHz,  $\text{CDCl}_3$ , 298 K)**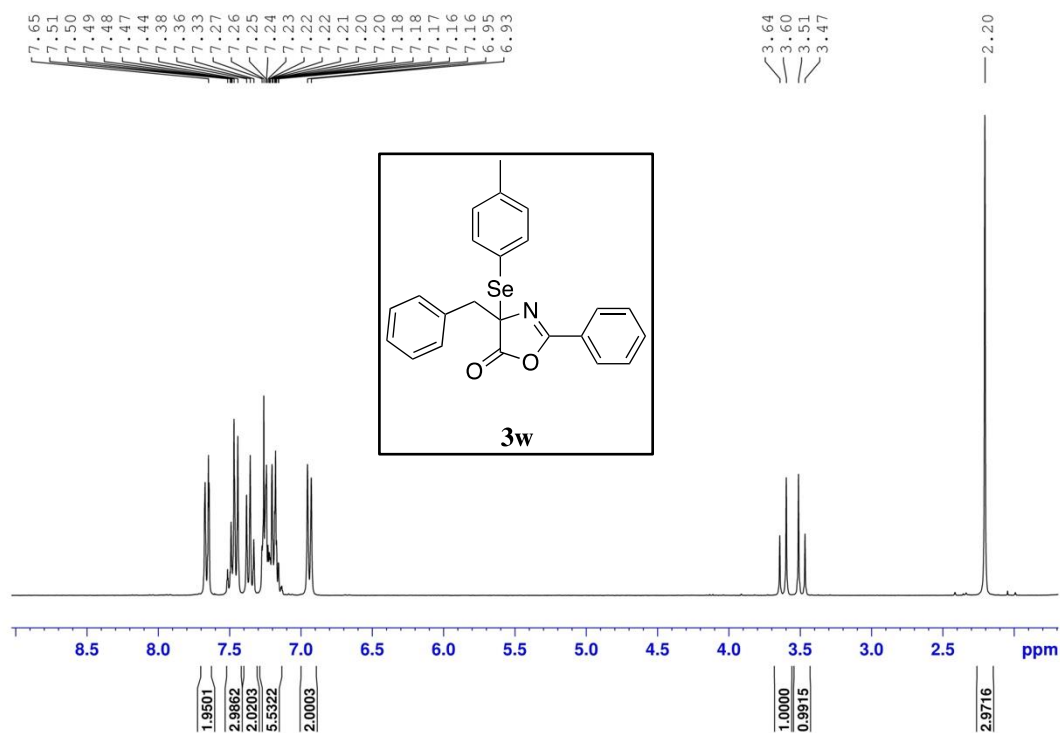 **$^{13}\text{C}$ -NMR (75 MHz,  $\text{CDCl}_3$ , 298 K)**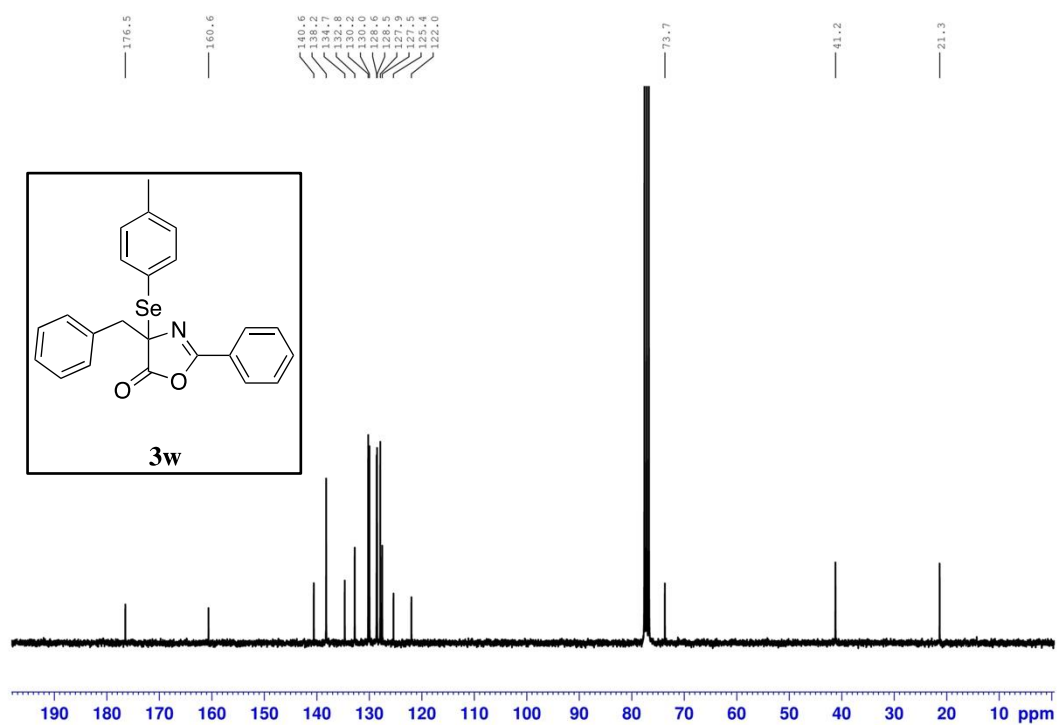

**NMR spectra of compound **3x**** **$^1\text{H}$ -NMR (300 MHz,  $\text{CDCl}_3$ , 298 K)**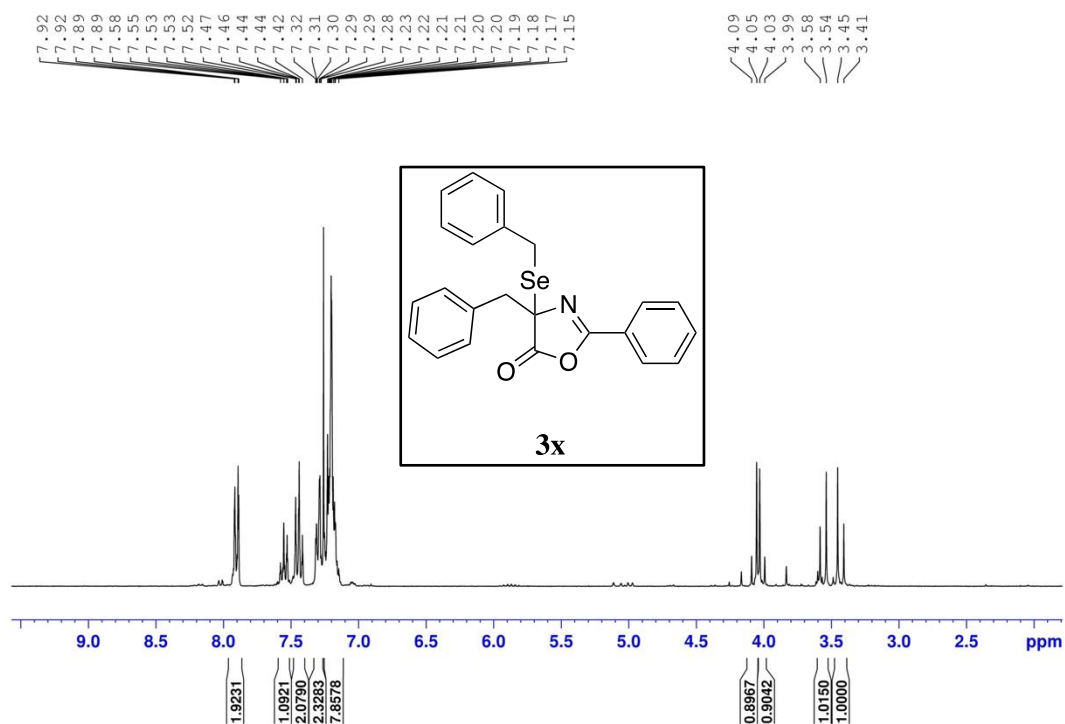 **$^{13}\text{C}$ -NMR (75 MHz,  $\text{CDCl}_3$ , 298 K)**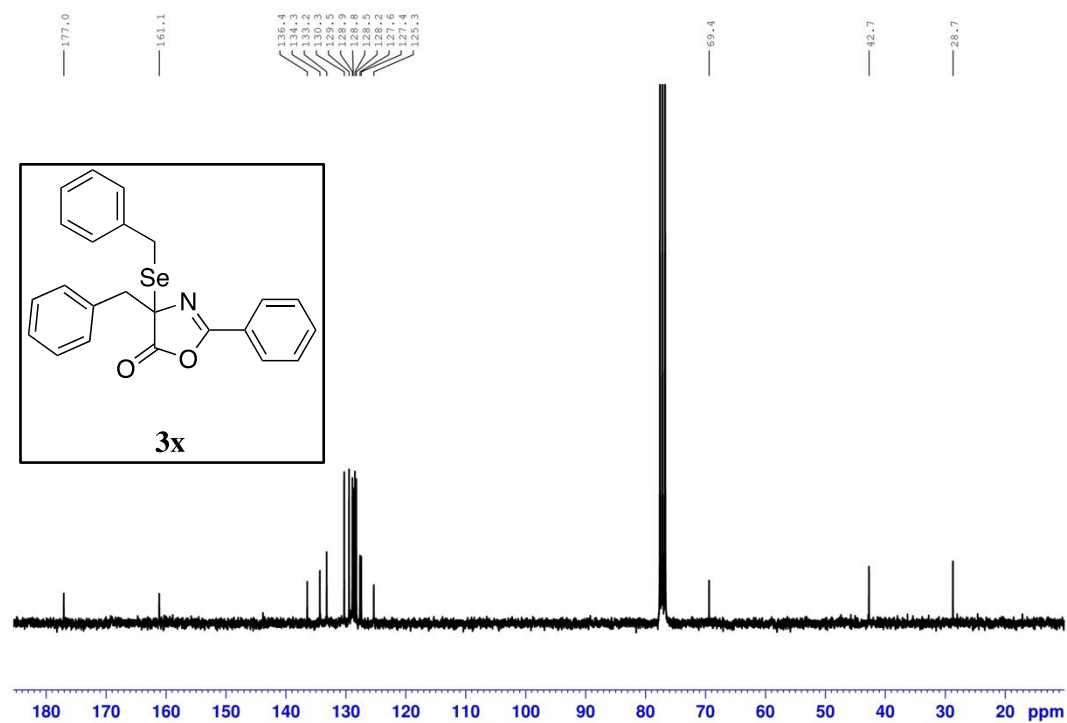

### NMR spectra of compound 4a

<sup>1</sup>H-NMR (300 MHz, CDCl<sub>3</sub>, 298 K)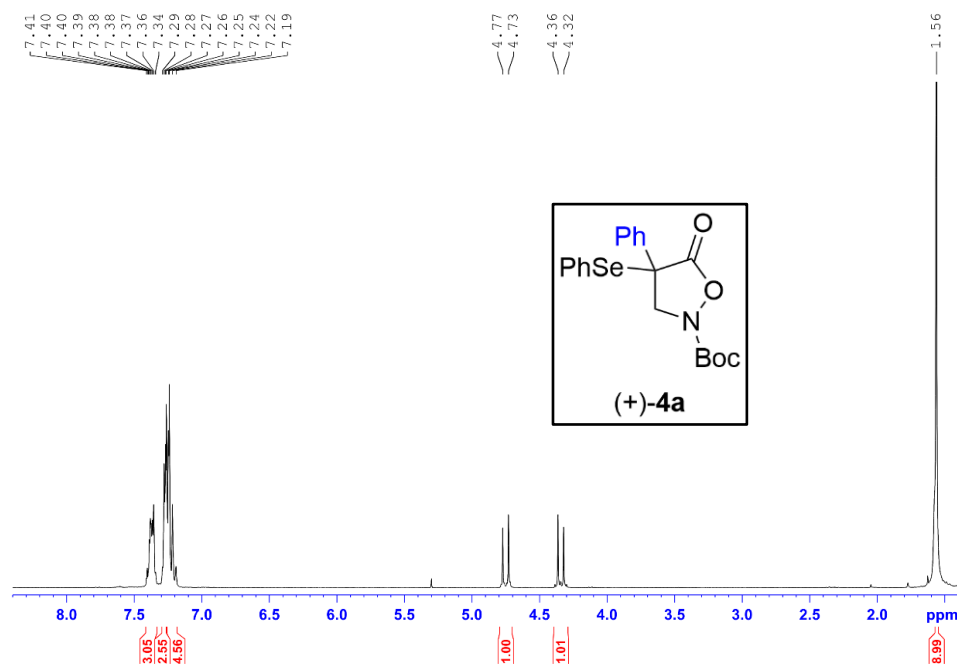<sup>13</sup>C-NMR (75 MHz, CDCl<sub>3</sub>, 298 K)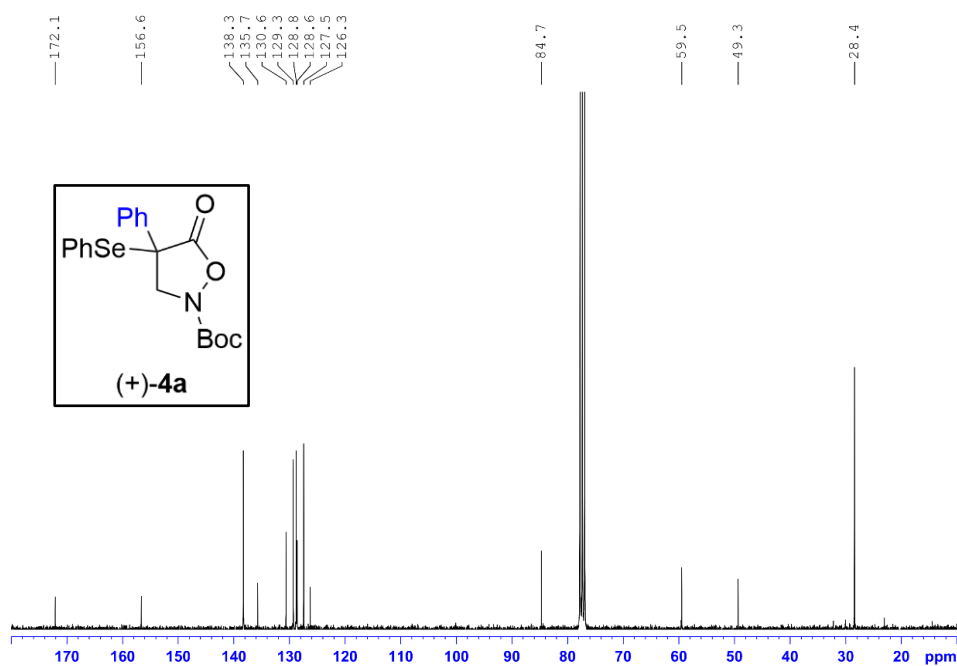

**NMR spectra of compound 4b** **$^1\text{H}$ -NMR** (300 MHz,  $\text{CDCl}_3$ , 298 K)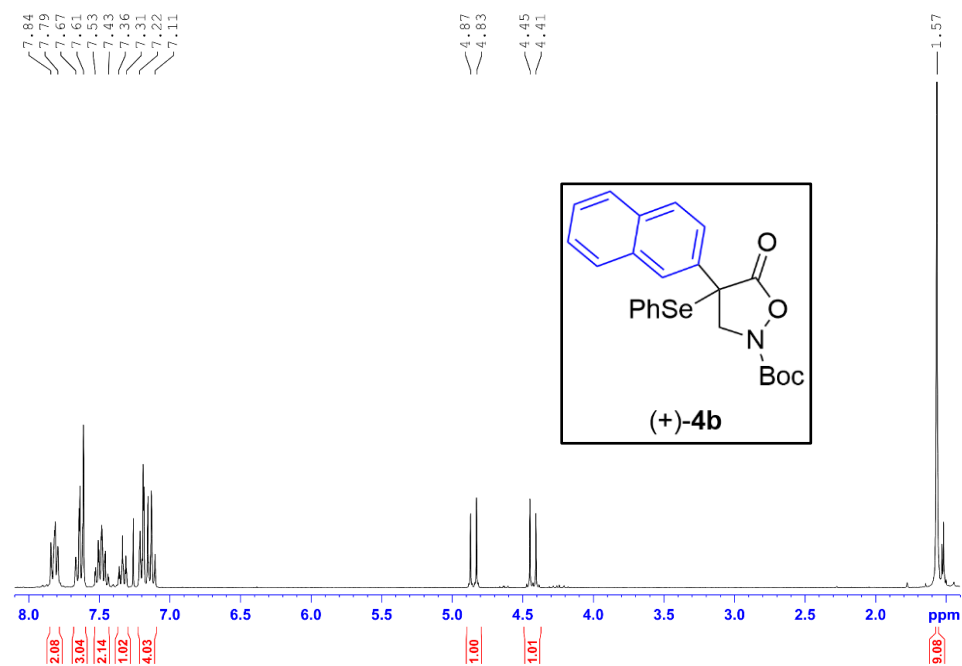 **$^{13}\text{C}$ -NMR** (75 MHz,  $\text{CDCl}_3$ , 298 K)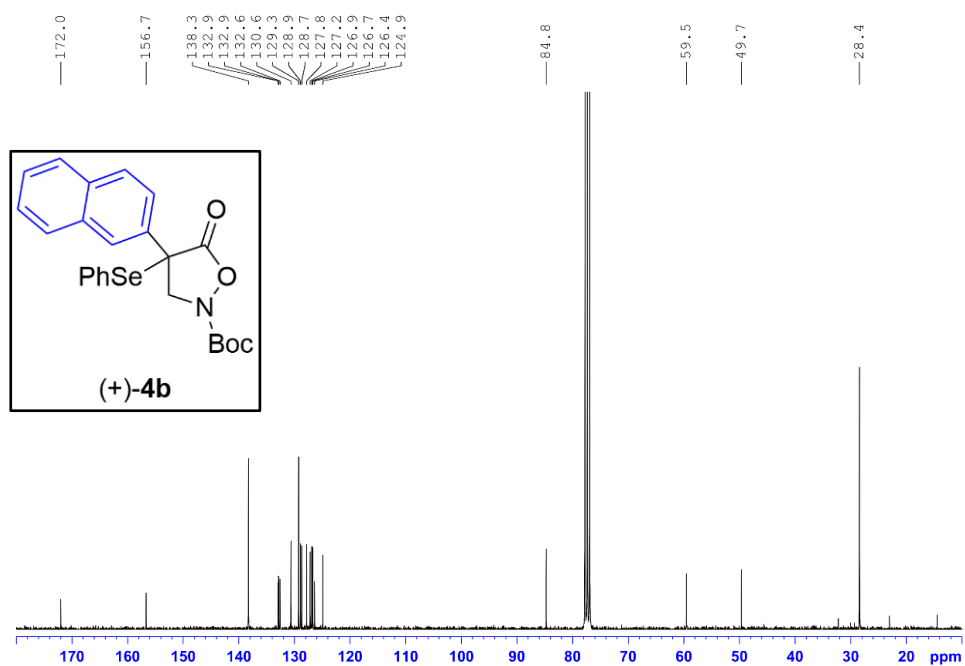

**NMR spectra of compound 4c** **$^1\text{H}$ -NMR** (300 MHz,  $\text{CDCl}_3$ , 298 K)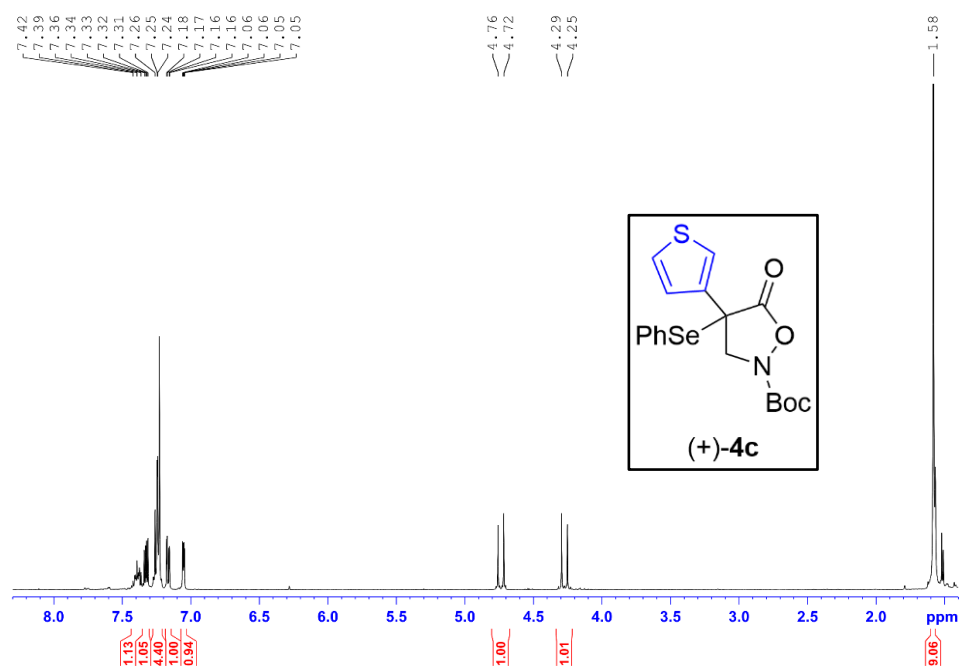 **$^{13}\text{C}$ -NMR** (75 MHz,  $\text{CDCl}_3$ , 298 K)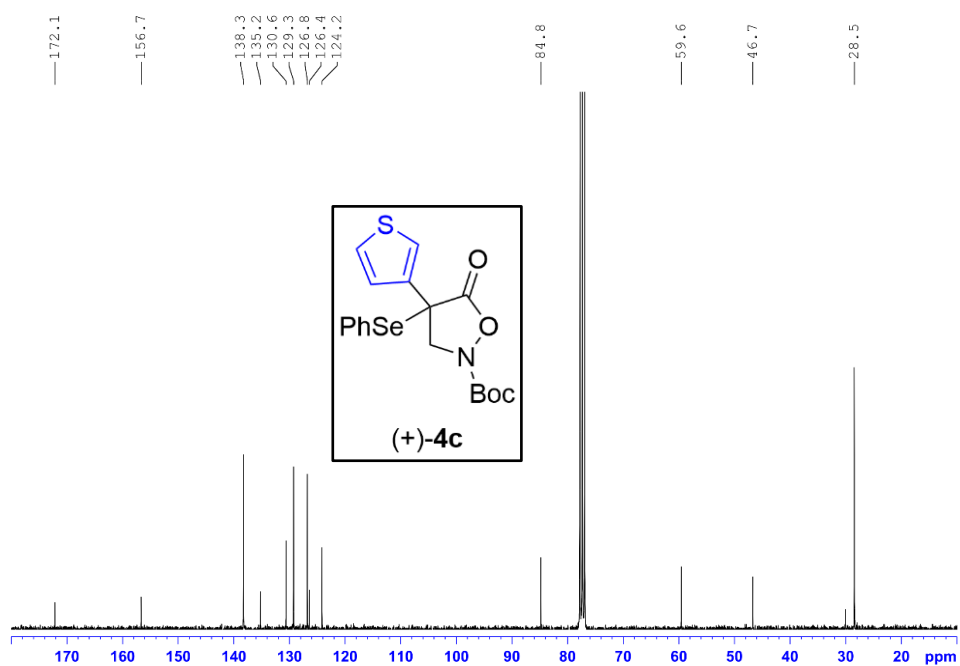

**NMR spectra of compound 4d** **$^1\text{H}$ -NMR** (300 MHz,  $\text{CDCl}_3$ , 298 K)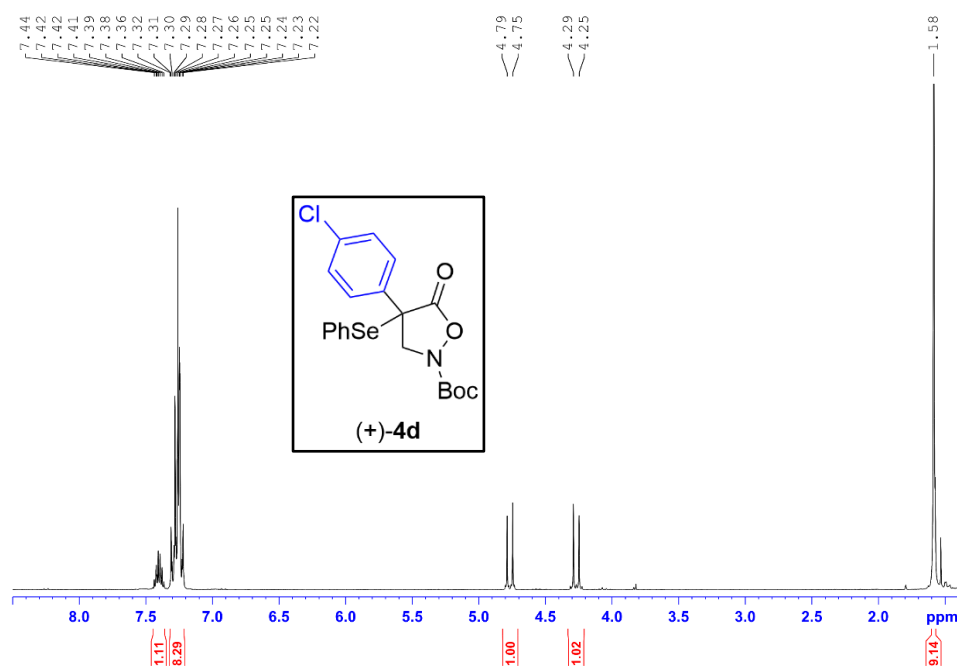 **$^{13}\text{C}$ -NMR** (75 MHz,  $\text{CDCl}_3$ , 298 K)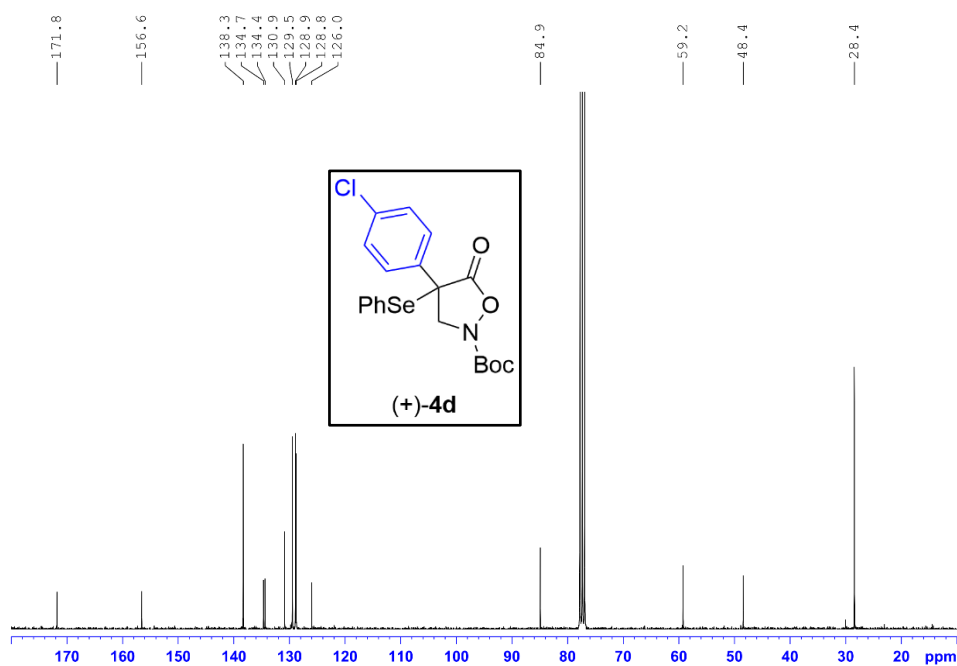

**NMR spectra of compound 4e** **$^1\text{H}$ -NMR** (300 MHz,  $\text{CDCl}_3$ , 298 K)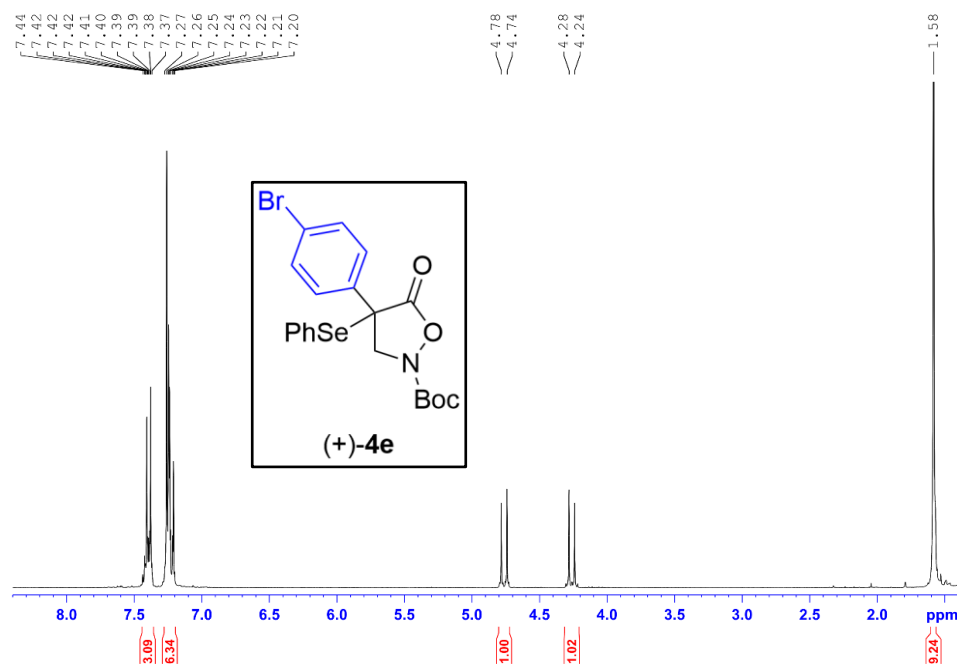 **$^{13}\text{C}$ -NMR** (75 MHz,  $\text{CDCl}_3$ , 298 K)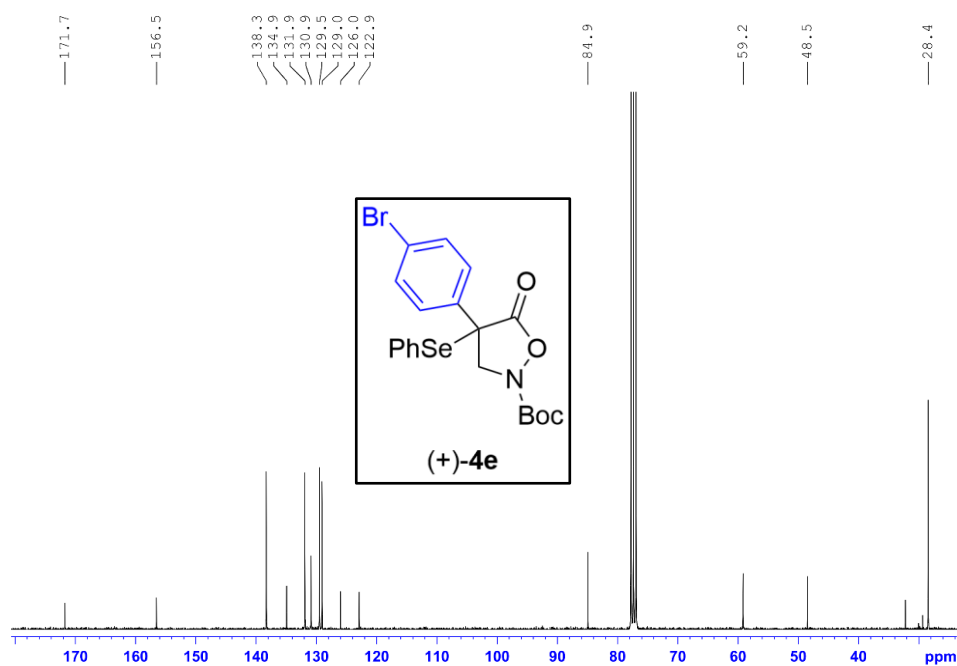

### NMR spectra of compound 4f

<sup>1</sup>H-NMR (300 MHz, CDCl<sub>3</sub>, 298 K)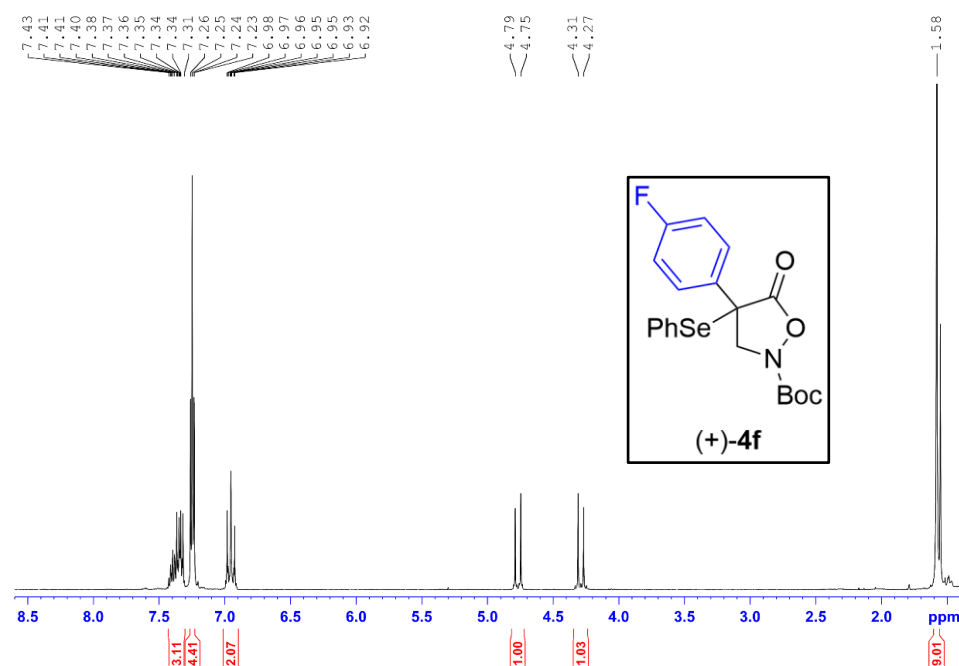<sup>13</sup>C-NMR (75 MHz, CDCl<sub>3</sub>, 298 K)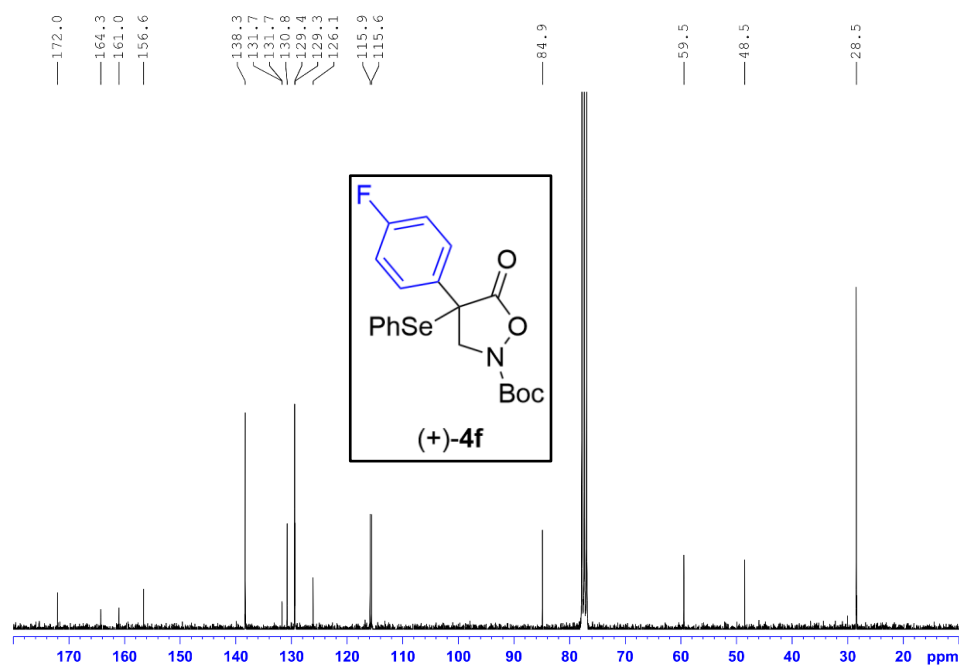

<sup>19</sup>F-NMR (282 MHz, CDCl<sub>3</sub>, 298 K)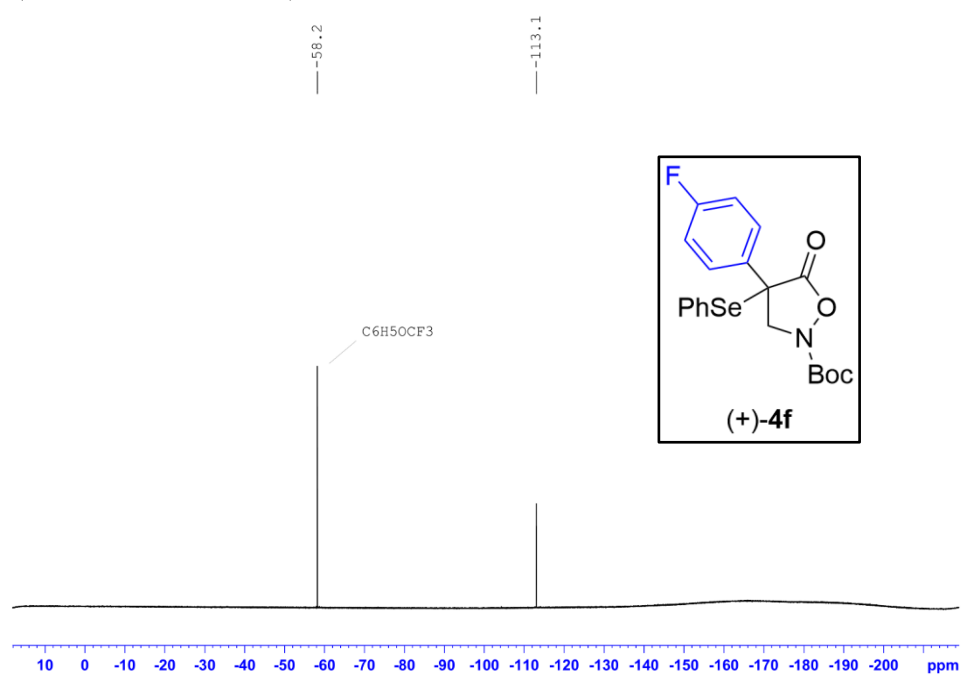

**NMR spectra of compound **4g**** **$^1\text{H}$ -NMR** (300 MHz,  $\text{CDCl}_3$ , 298 K)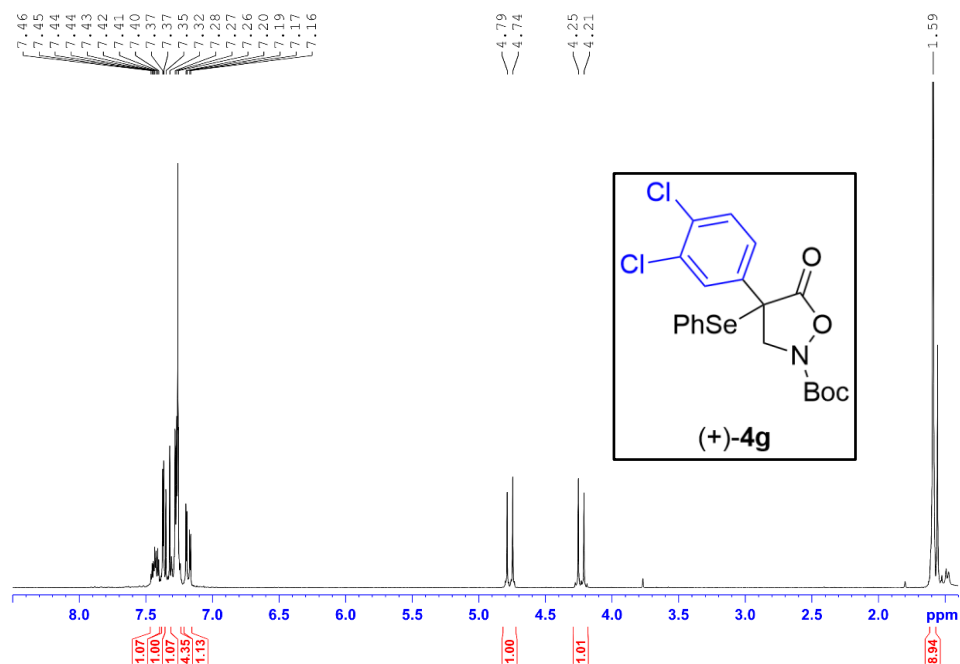 **$^{13}\text{C}$ -NMR** (75 MHz,  $\text{CDCl}_3$ , 298 K)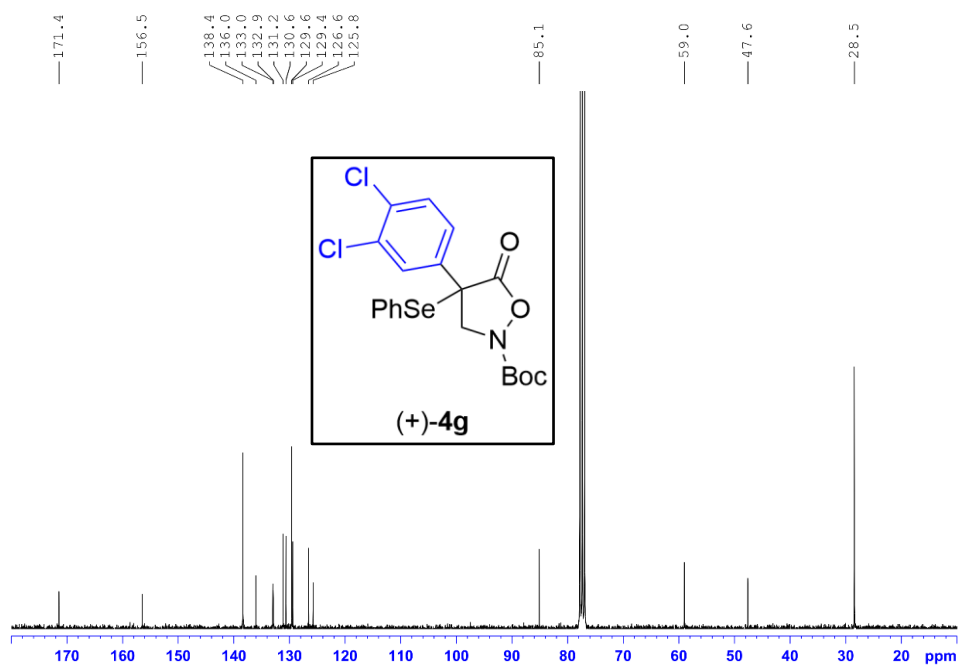

**NMR spectra of compound **4i**** **$^1\text{H}$ -NMR** (500 MHz,  $\text{CDCl}_3$ , 298 K)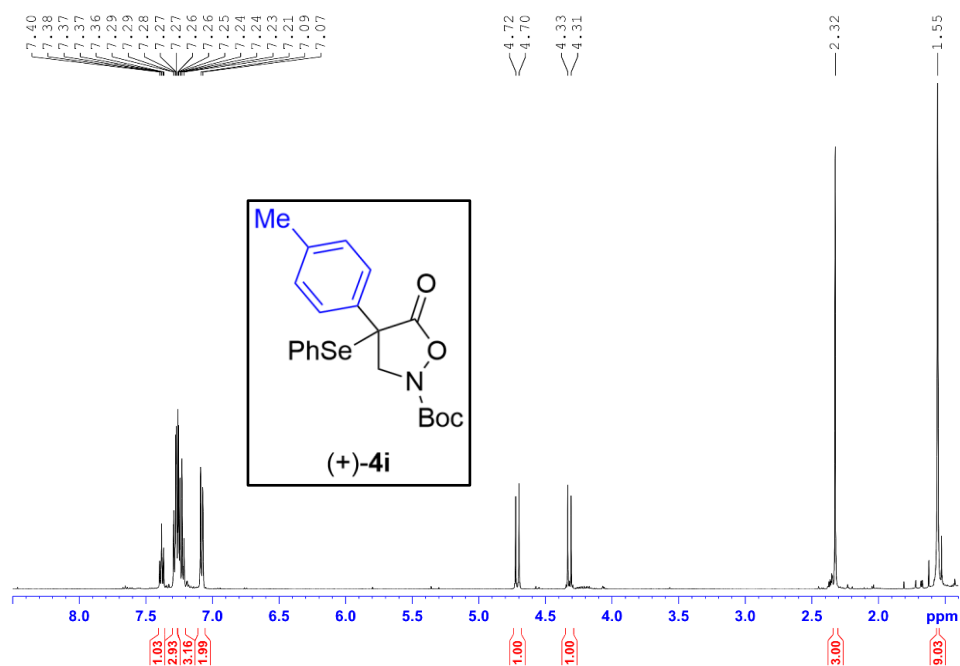 **$^{13}\text{C}$ -NMR** (126 MHz,  $\text{CDCl}_3$ , 298 K)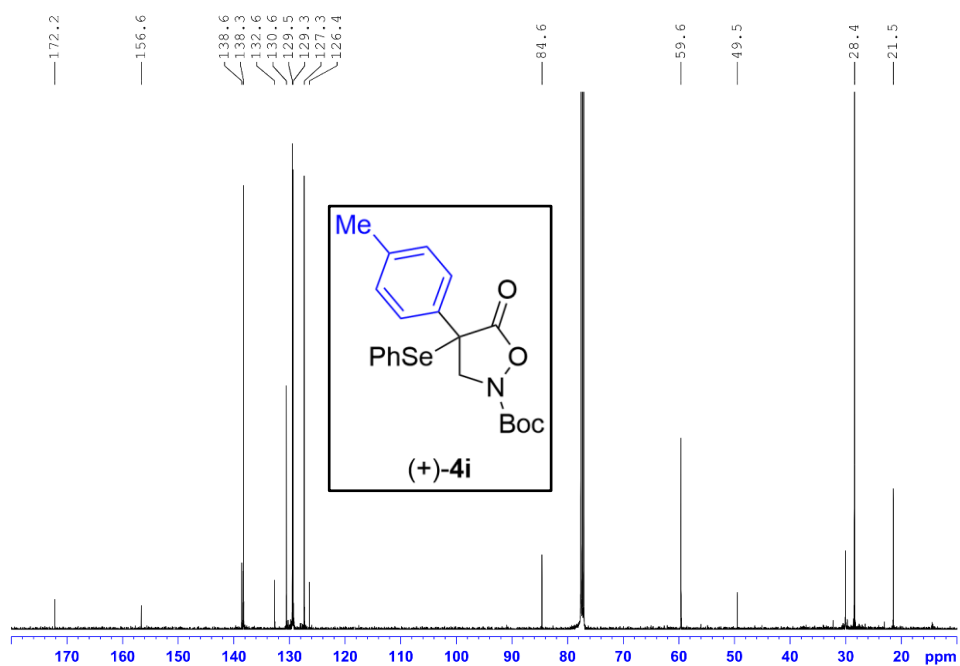



**NMR spectra of compound 4k** **$^1\text{H}$ -NMR** (300 MHz,  $\text{CDCl}_3$ , 298 K)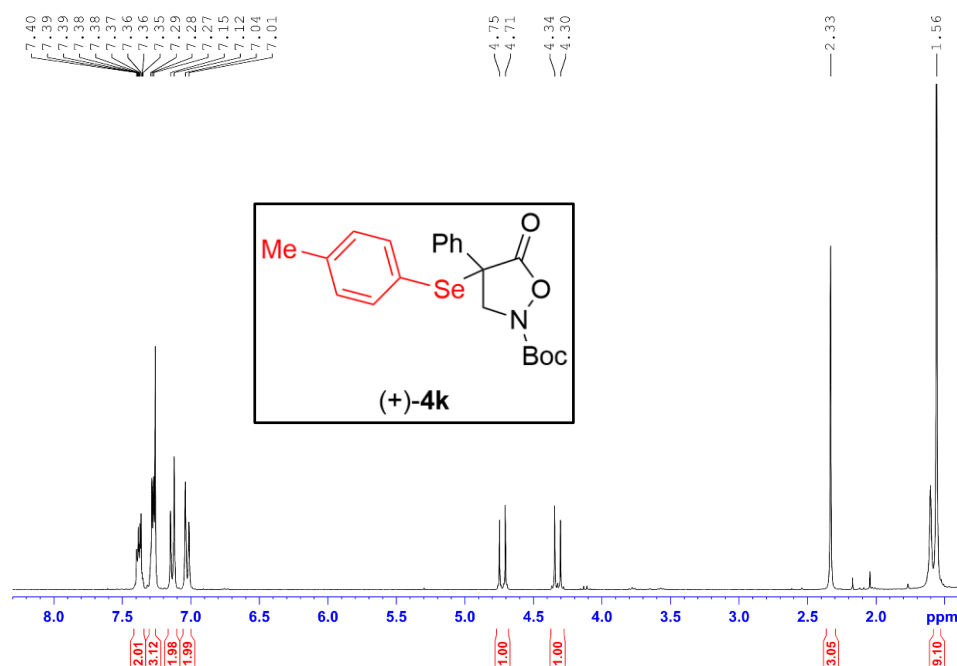 **$^{13}\text{C}$ -NMR** (75 MHz,  $\text{CDCl}_3$ , 298 K)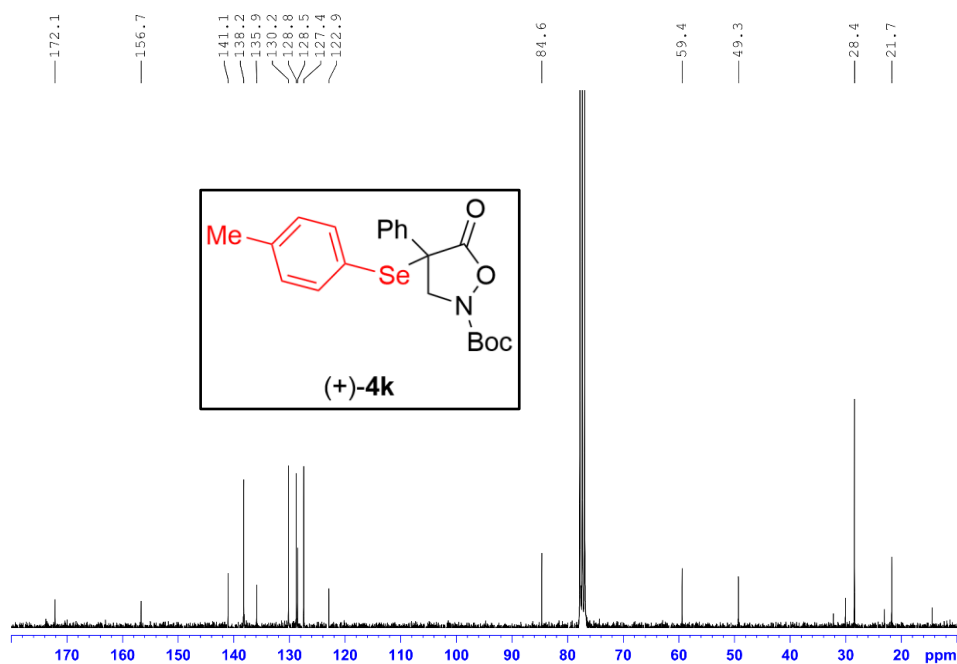

<sup>1</sup>H-NMR (500 MHz, CDCl<sub>3</sub>, 298 K)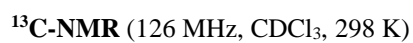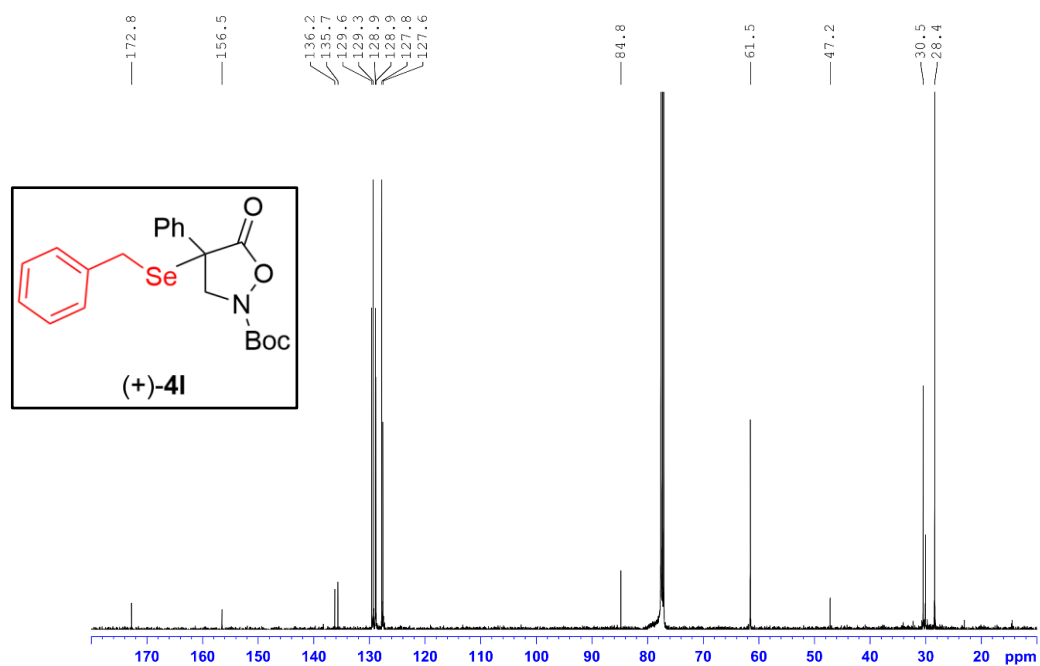

**NMR spectra of compound 6** **$^1\text{H}$ -NMR** (300 MHz,  $\text{CDCl}_3$ , 298 K)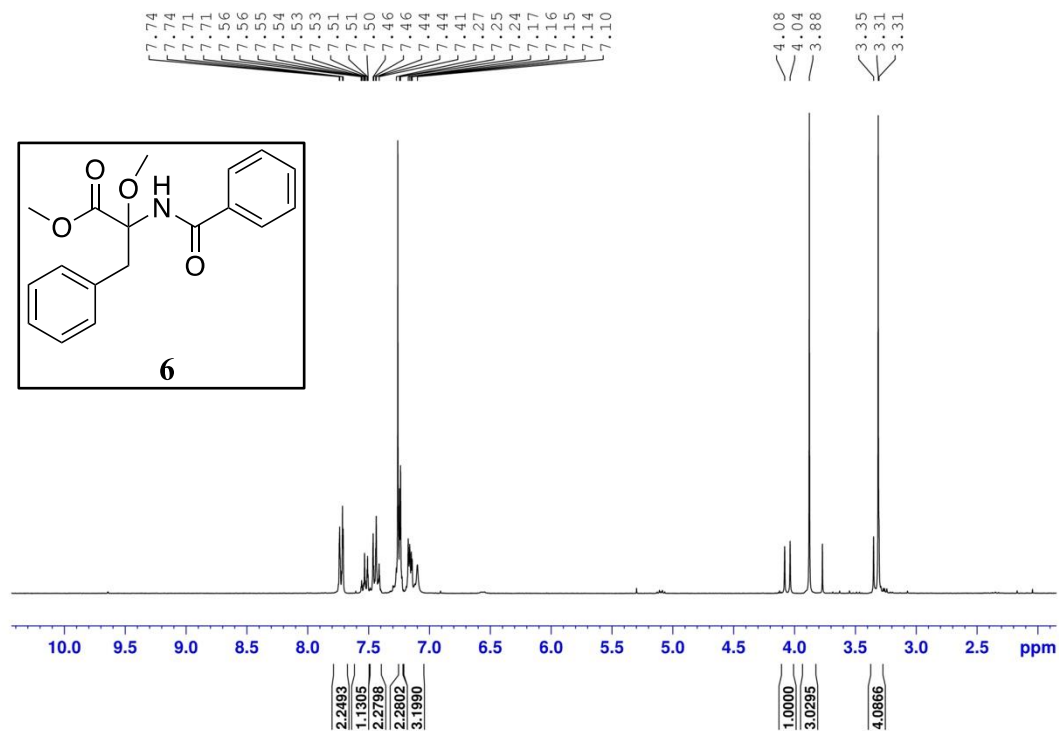 **$^{13}\text{C}$ -NMR** (75 MHz,  $\text{CDCl}_3$ , 298 K)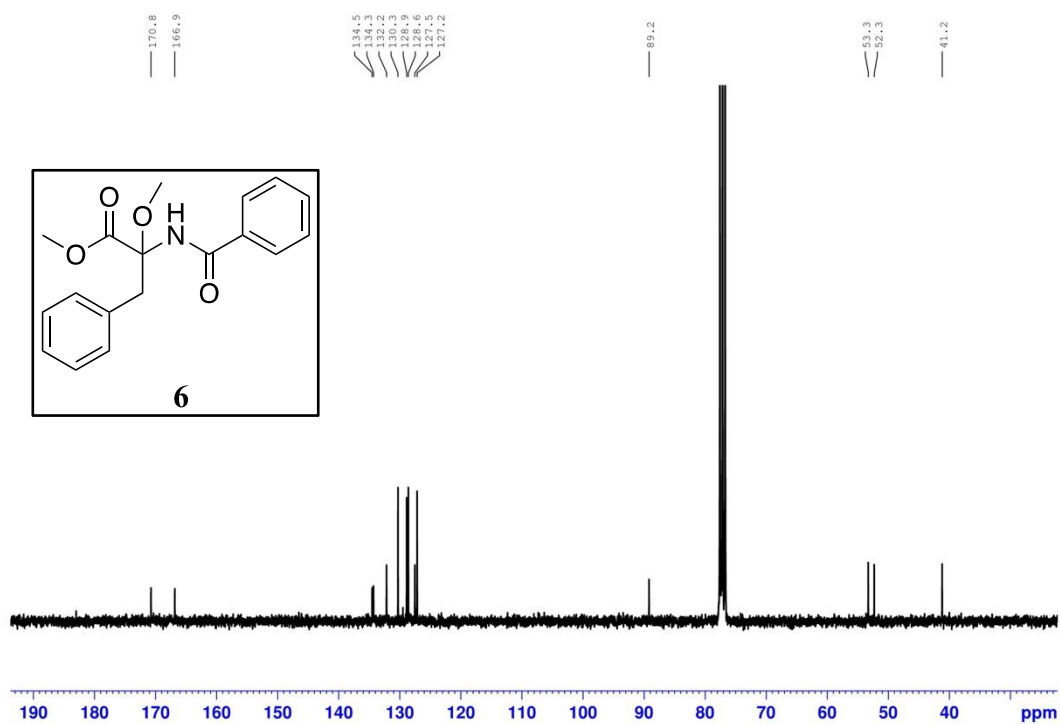

**NMR spectra of compound 8** **$^1\text{H}$ -NMR (300 MHz,  $\text{CDCl}_3$ , 298 K)**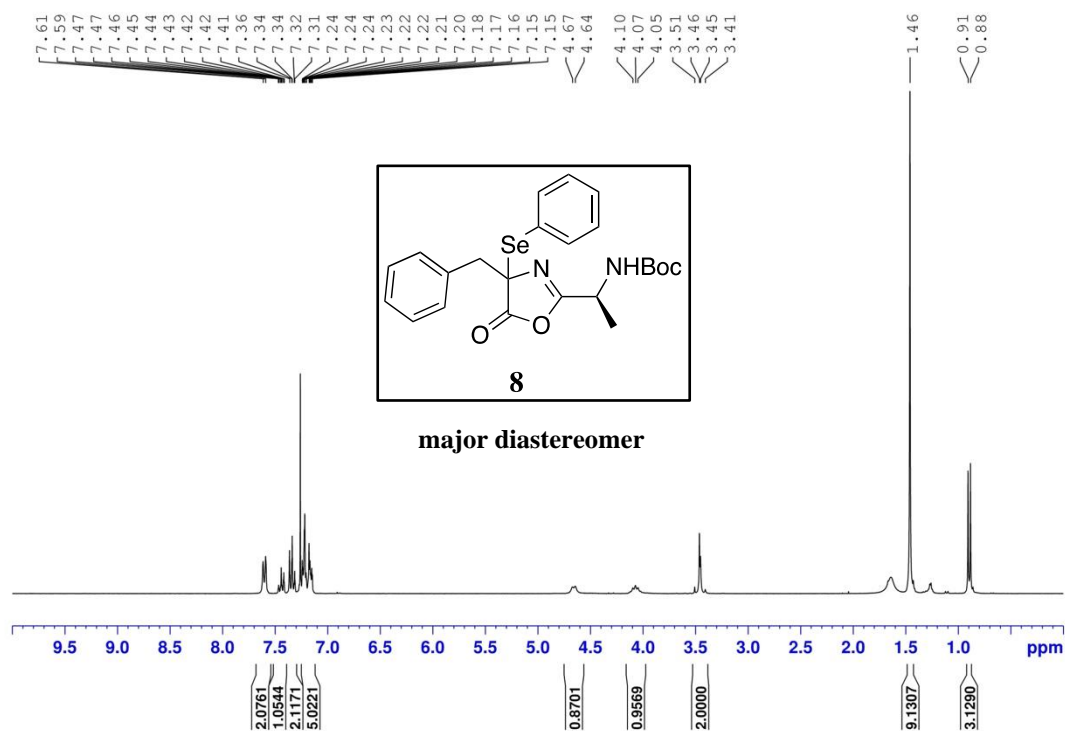 **$^1\text{H}$ -NMR (300 MHz,  $\text{CDCl}_3$ , 298 K)**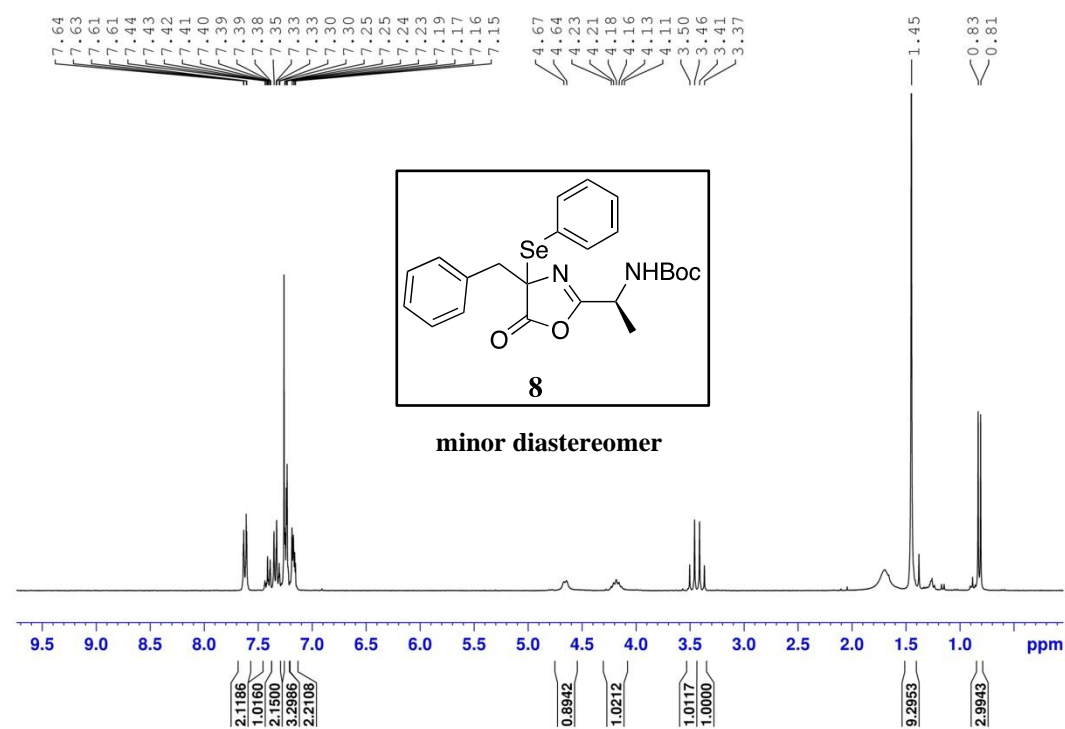

**NMR spectra of compound 9a** **$^1\text{H}$ -NMR** (300 MHz,  $\text{CDCl}_3$ , 298 K)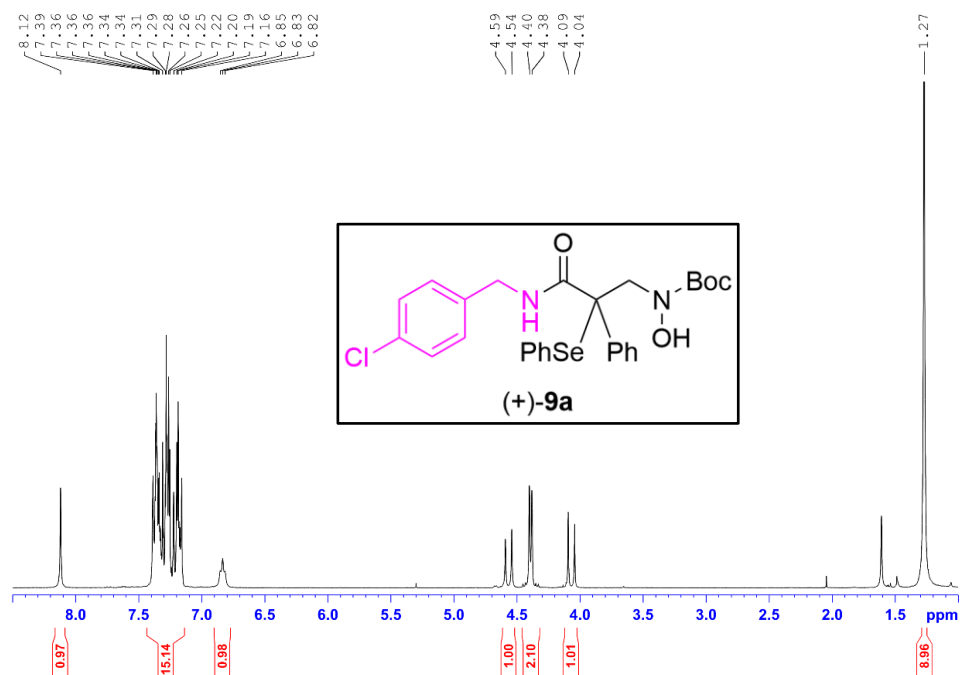 **$^{13}\text{C}$ -NMR** (75 MHz,  $\text{CDCl}_3$ , 298 K)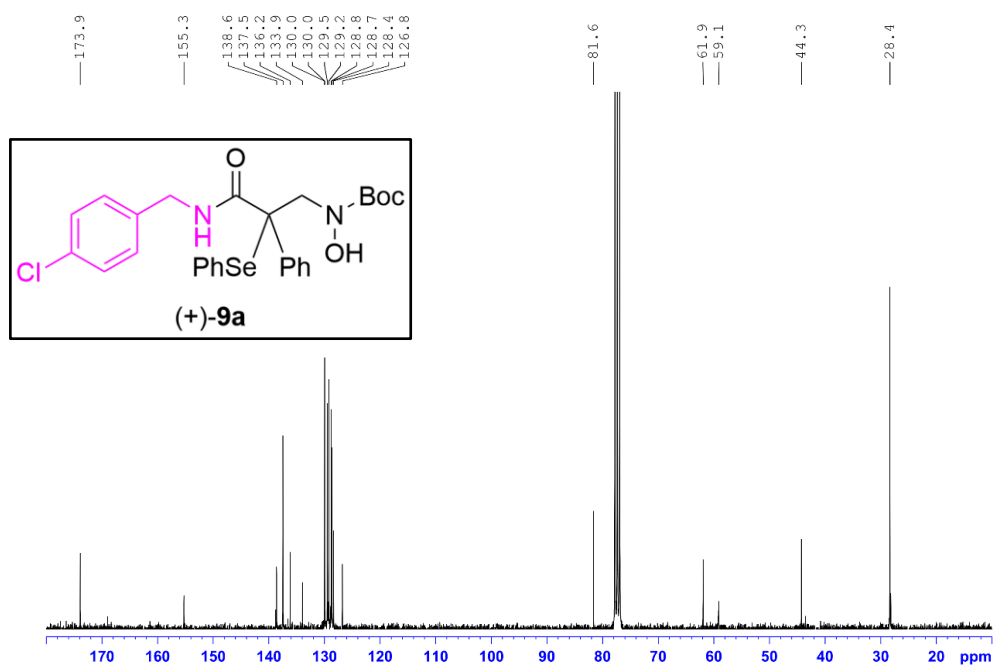

**NMR spectra of compound 9b** **$^1\text{H}$ -NMR** (500 MHz,  $\text{CDCl}_3$ , 298 K)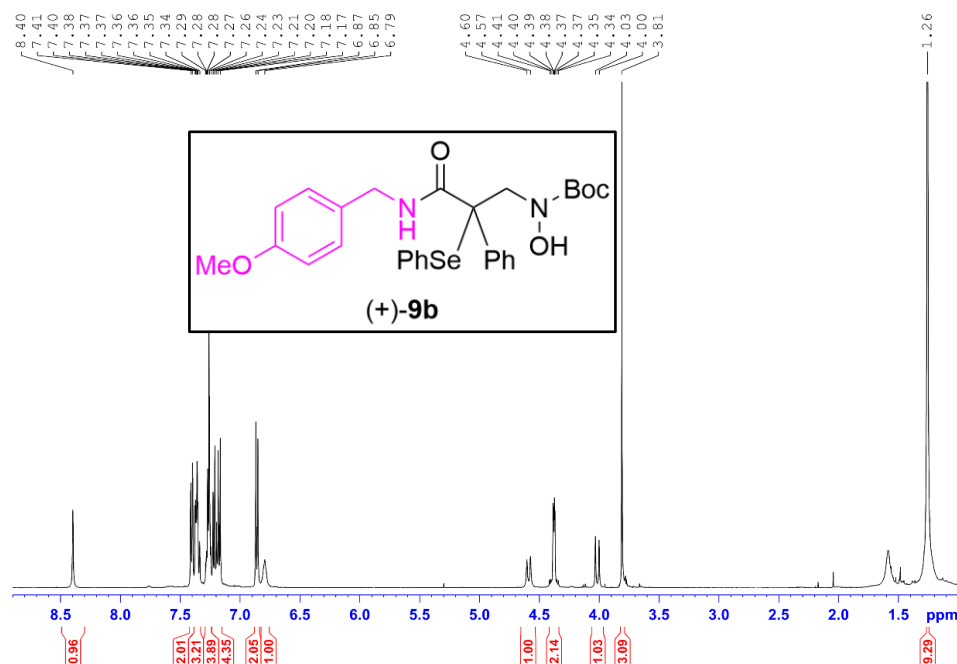 **$^{13}\text{C}$ -NMR** (126 MHz,  $\text{CDCl}_3$ , 298 K)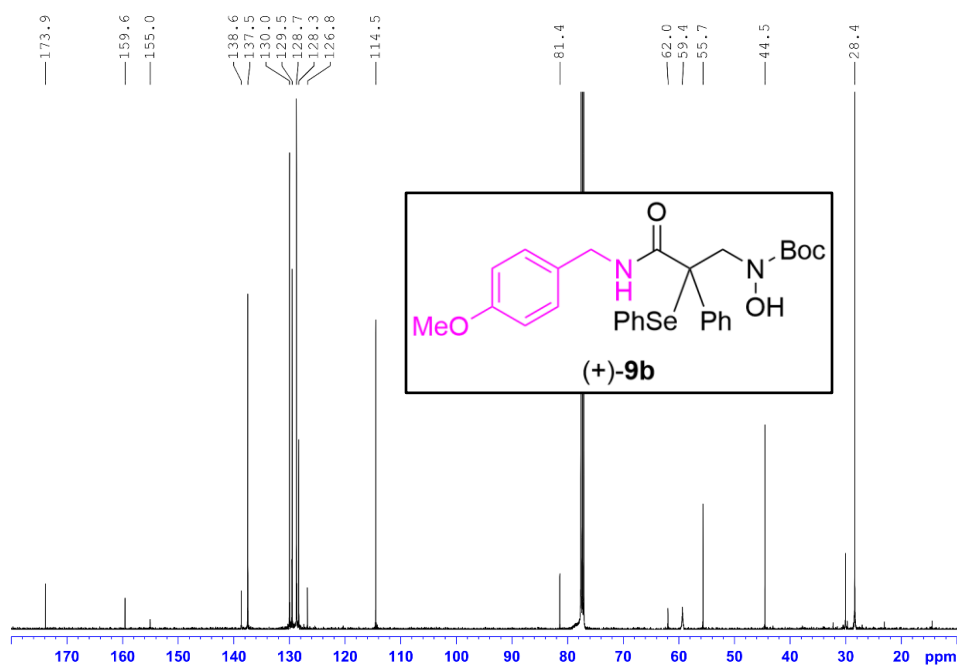

**NMR spectra of compound 10** **$^1\text{H}$ -NMR** (300 MHz,  $\text{CDCl}_3$ , 298 K)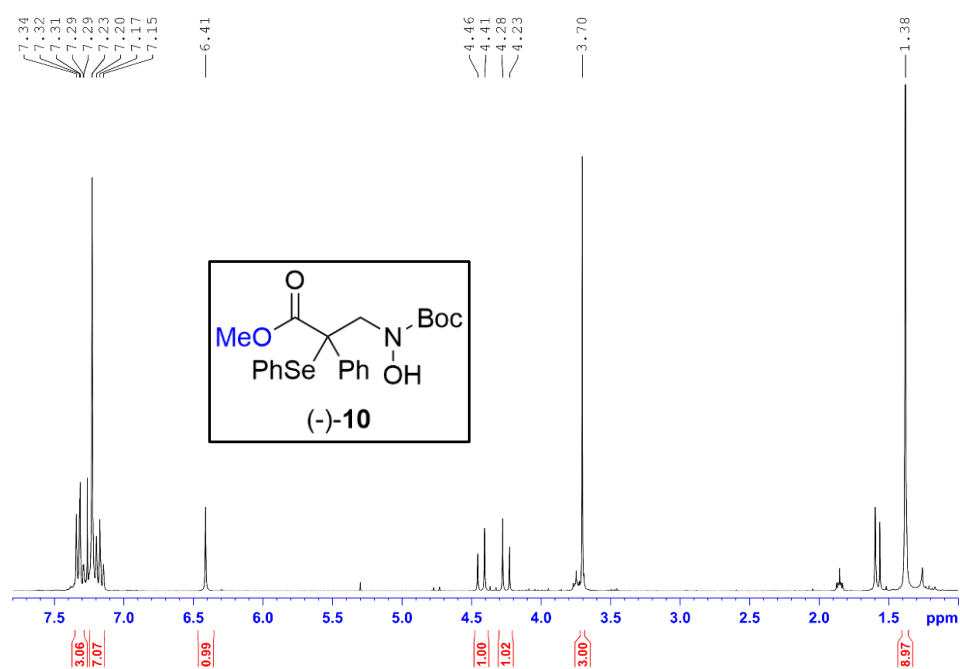 **$^{13}\text{C}$ -NMR** (176 MHz,  $\text{CDCl}_3$ , 298 K)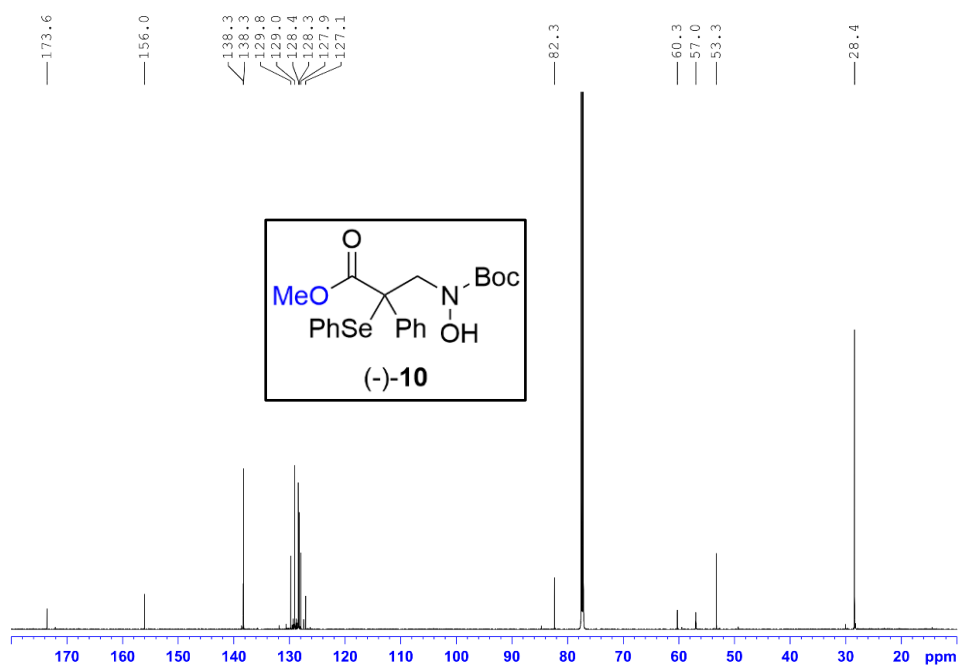

**NMR spectra of compound 11** **$^1\text{H}$ -NMR (300 MHz,  $\text{CDCl}_3$ , 298 K)**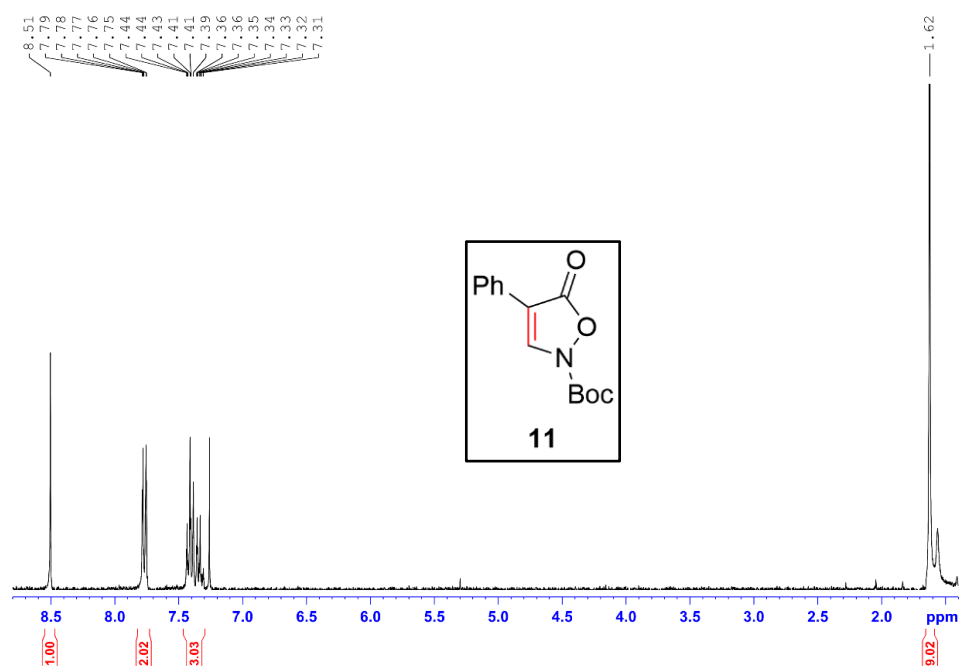 **$^{13}\text{C}$ -NMR (75 MHz,  $\text{CDCl}_3$ , 298 K)**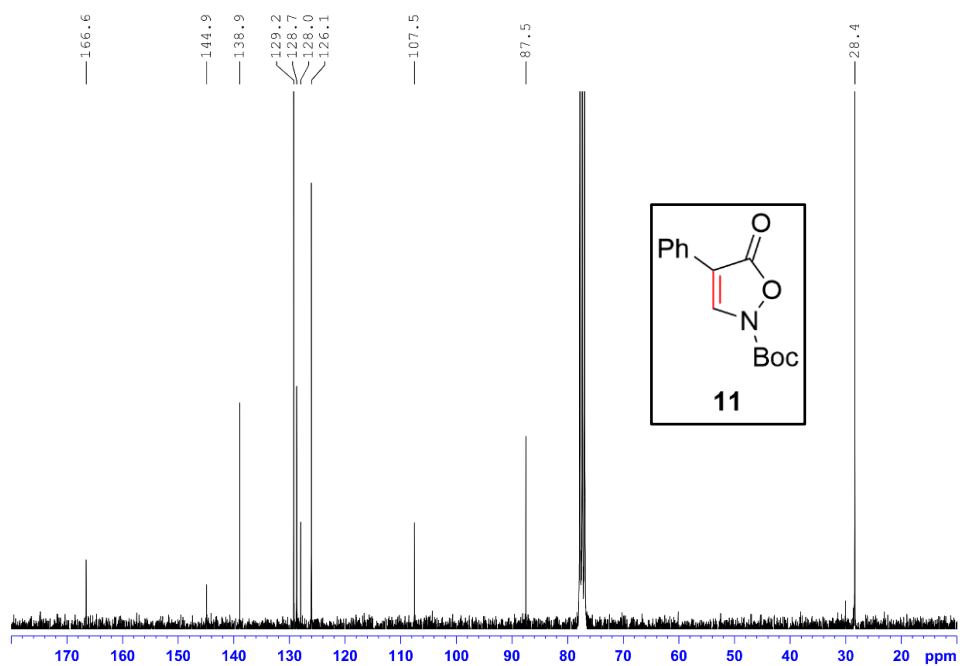

## 10. HPLC Traces of Racemic and Enantioenriched Selenation Products

HPLC traces of **3a** (Chiralpak AD-H, *n*-hexane:*i*-PrOH = 20:1, flow rate 0.3 mL/min, 10 °C,  $\lambda$  = 220 nm)

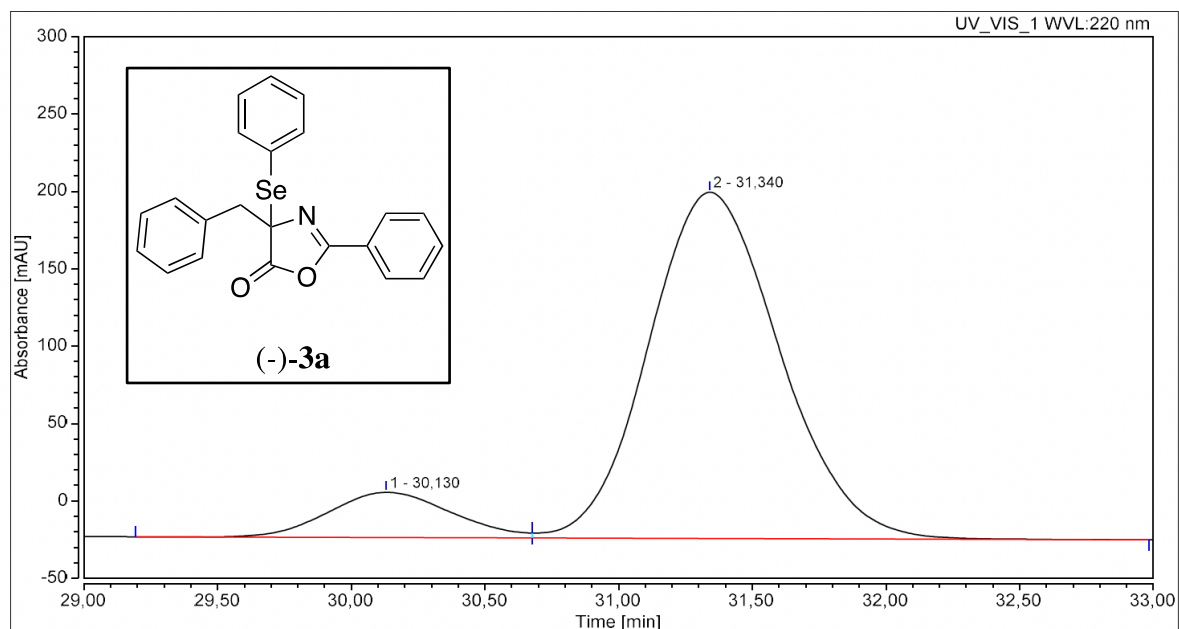

| Integration Results |           |                    |              |            |                 |                   |             |
|---------------------|-----------|--------------------|--------------|------------|-----------------|-------------------|-------------|
| No.                 | Peak Name | Retention Time min | Area mAU*min | Height mAU | Relative Area % | Relative Height % | Amount n.a. |
| 1                   |           | 30,130             | 15,593       | 29,159     | 10,92           | 11,53             | n.a.        |
| 2                   |           | 31,340             | 127,209      | 223,740    | 89,08           | 88,47             | n.a.        |
| Total:              |           |                    | 142,802      | 252,898    | 100,00          | 100,00            |             |

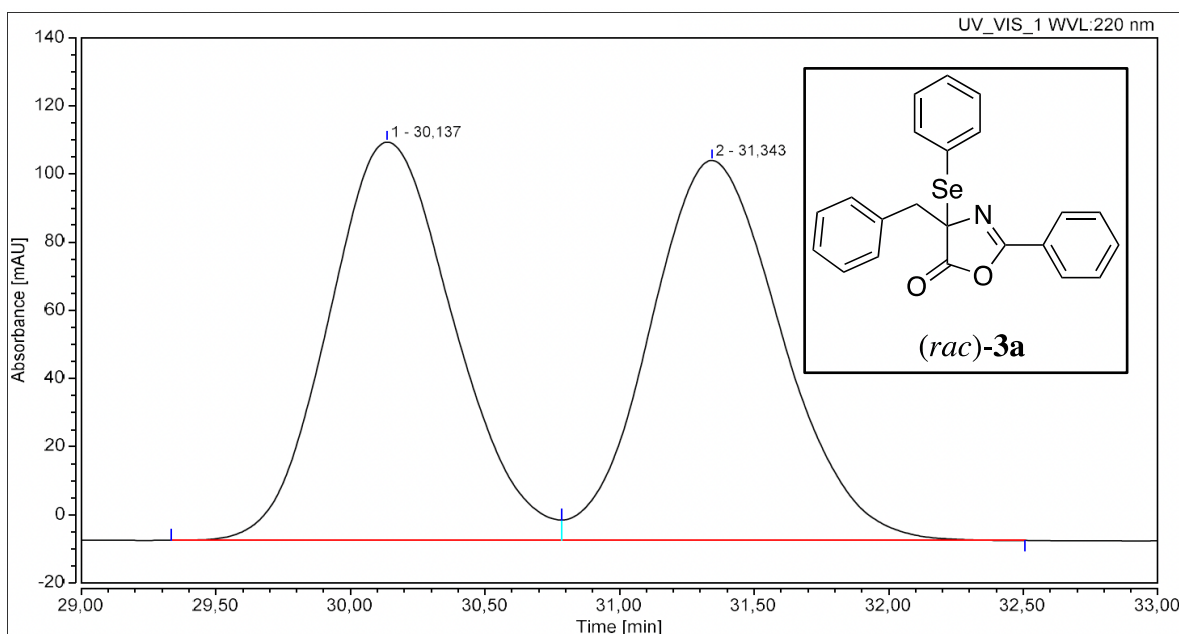

| Integration Results |           |                    |              |            |                 |                   |             |
|---------------------|-----------|--------------------|--------------|------------|-----------------|-------------------|-------------|
| No.                 | Peak Name | Retention Time min | Area mAU*min | Height mAU | Relative Area % | Relative Height % | Amount n.a. |
| 1                   |           | 30,137             | 62,977       | 116,797    | 49,95           | 51,17             | n.a.        |
| 2                   |           | 31,343             | 63,115       | 111,475    | 50,05           | 48,83             | n.a.        |
| Total:              |           |                    | 126,093      | 228,272    | 100,00          | 100,00            |             |

**HPLC traces of **3c**** (Chiralpak AD-H, *n*-hexane:*i*-PrOH = 20:1, flow rate 0.3 mL/min, 10 °C,  $\lambda$  = 220 nm)

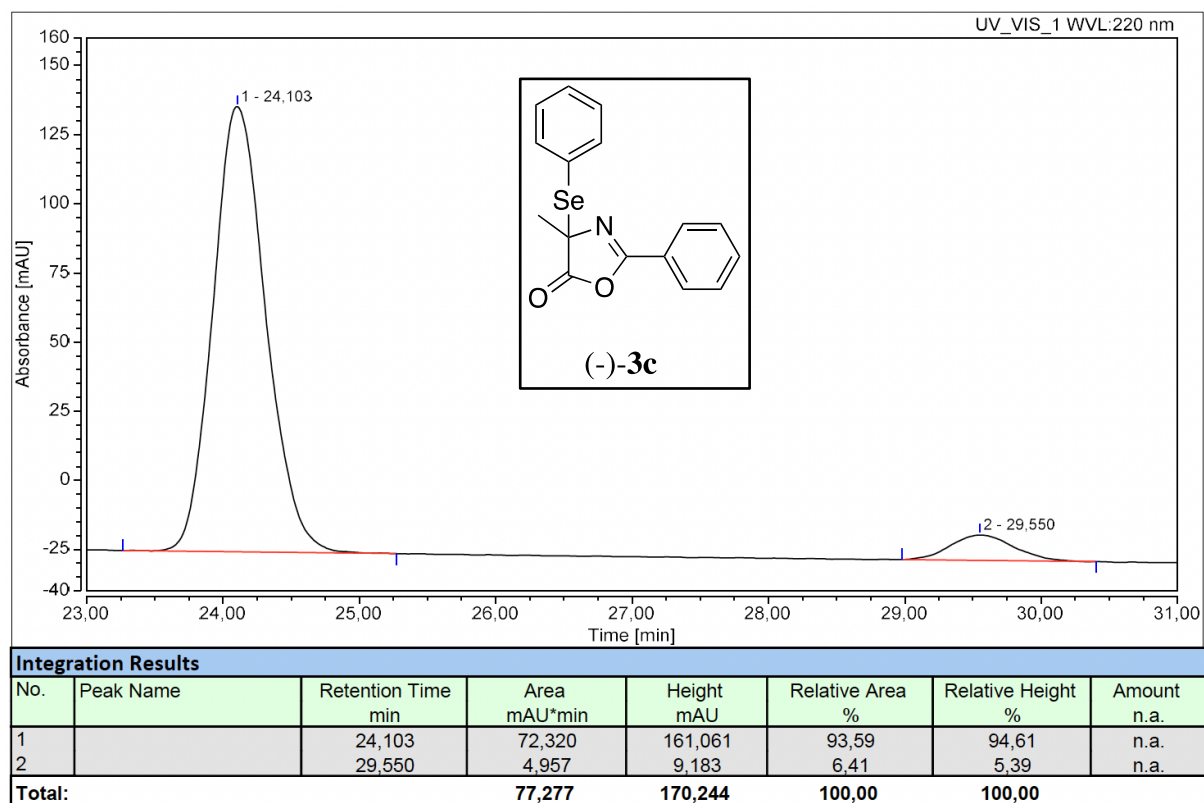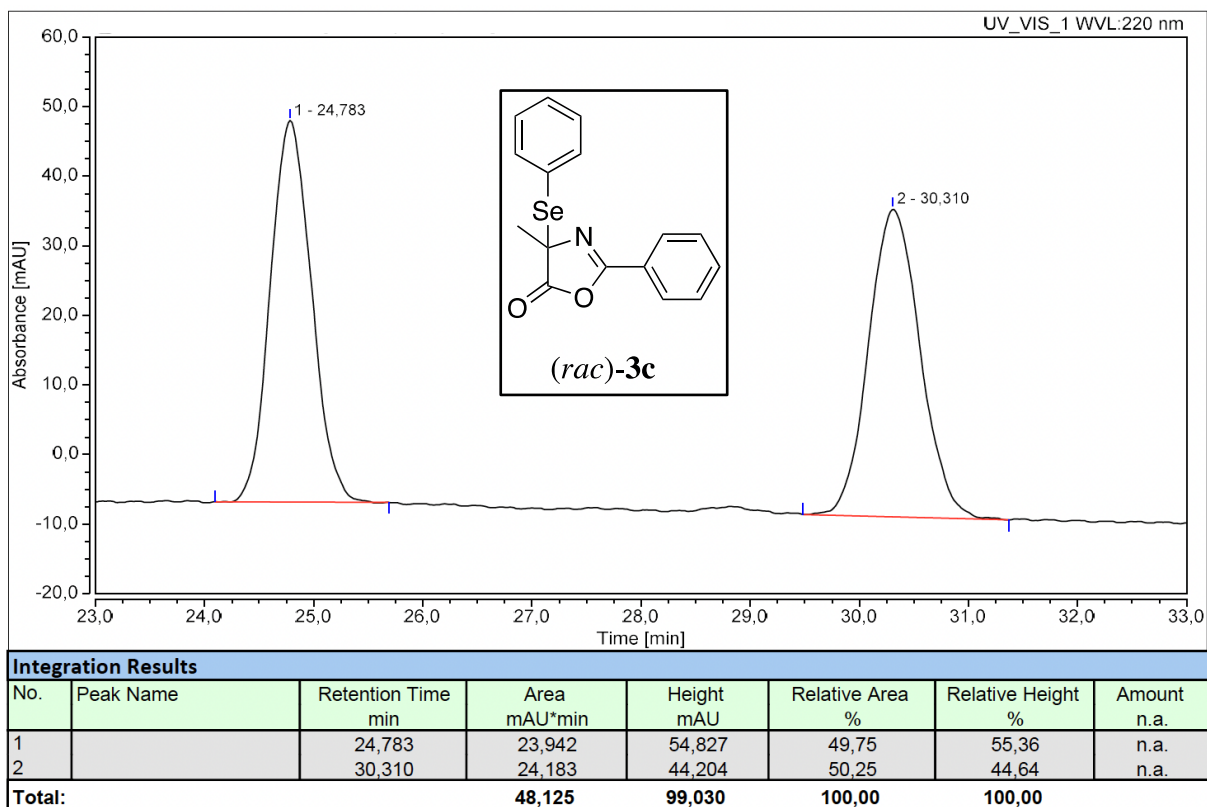

**HPLC traces of **3d**** (Chiralpak AD-H, *n*-hexane:*i*-PrOH = 20:1, flow rate 0.3 mL/min, 10 °C,  $\lambda$  = 220 nm)

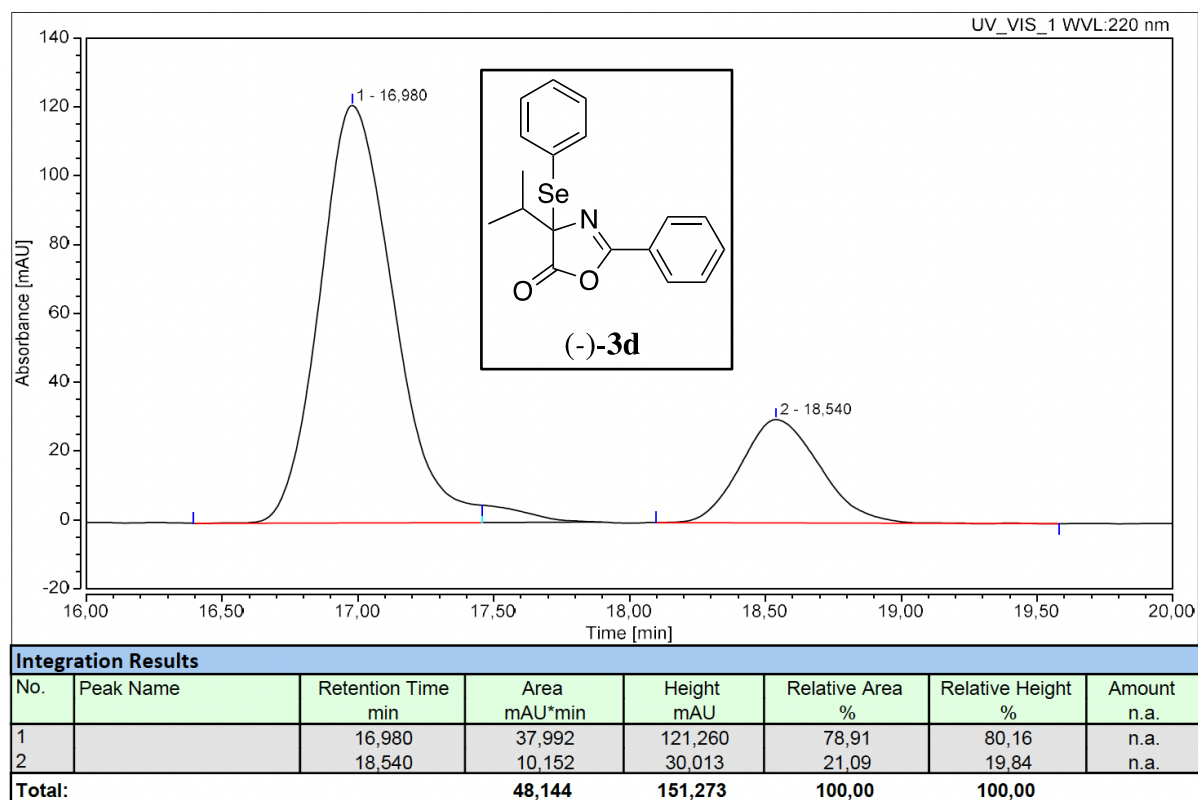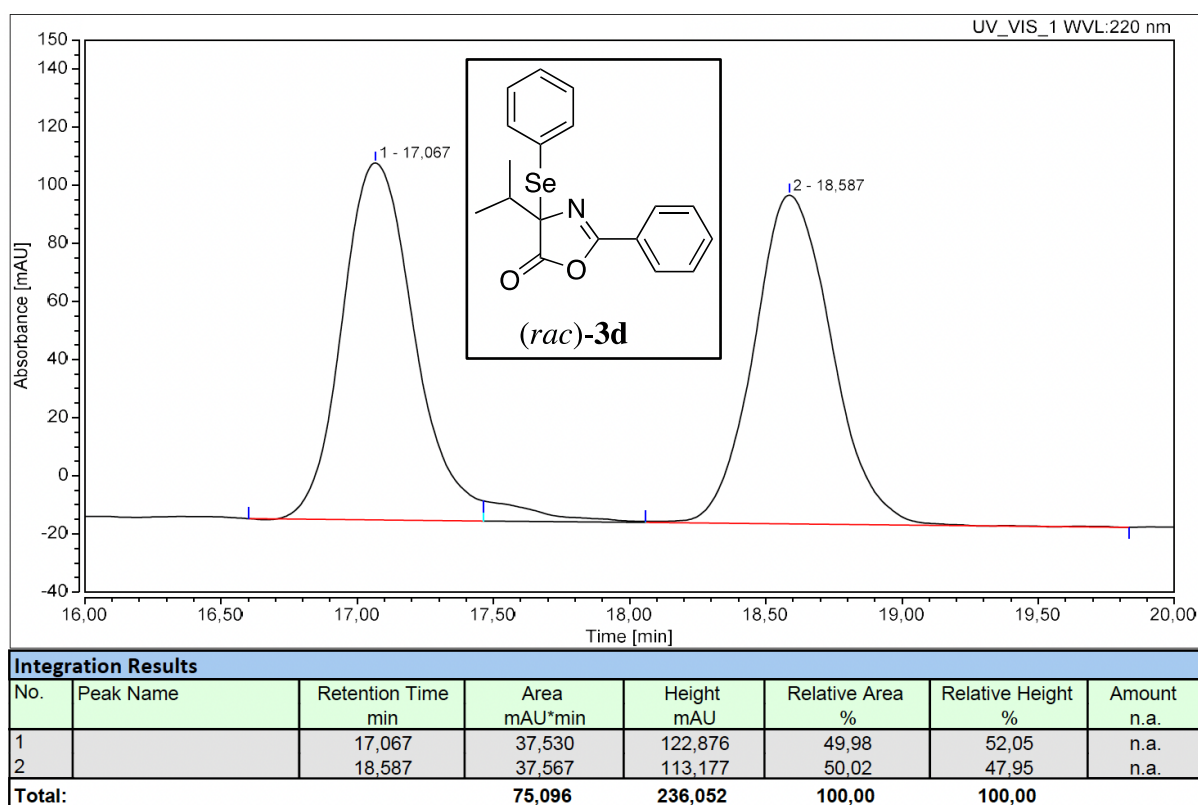

**HPLC traces of **3e**** (YMC Chiral Art Cellulose SB, *n*-hexane:*i*-PrOH = 80:1, flow rate 0.2 mL/min, 10 °C,  $\lambda$  = 220 nm)

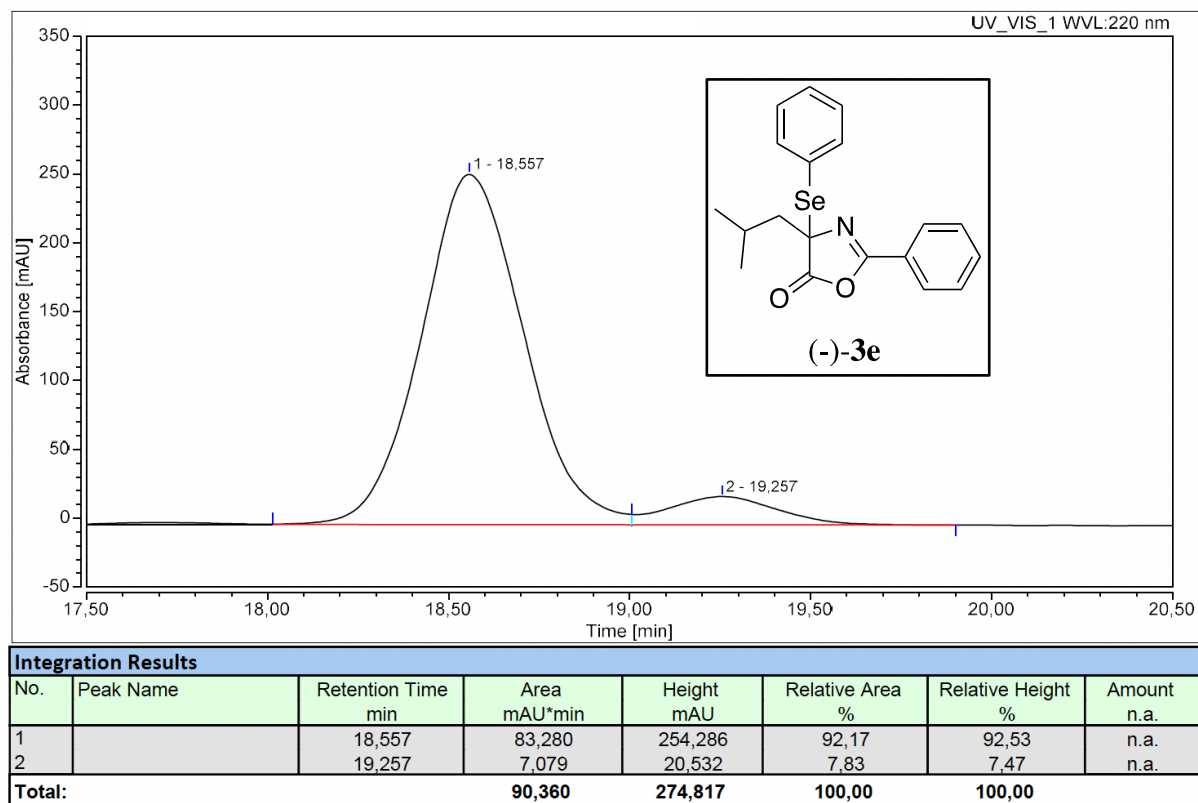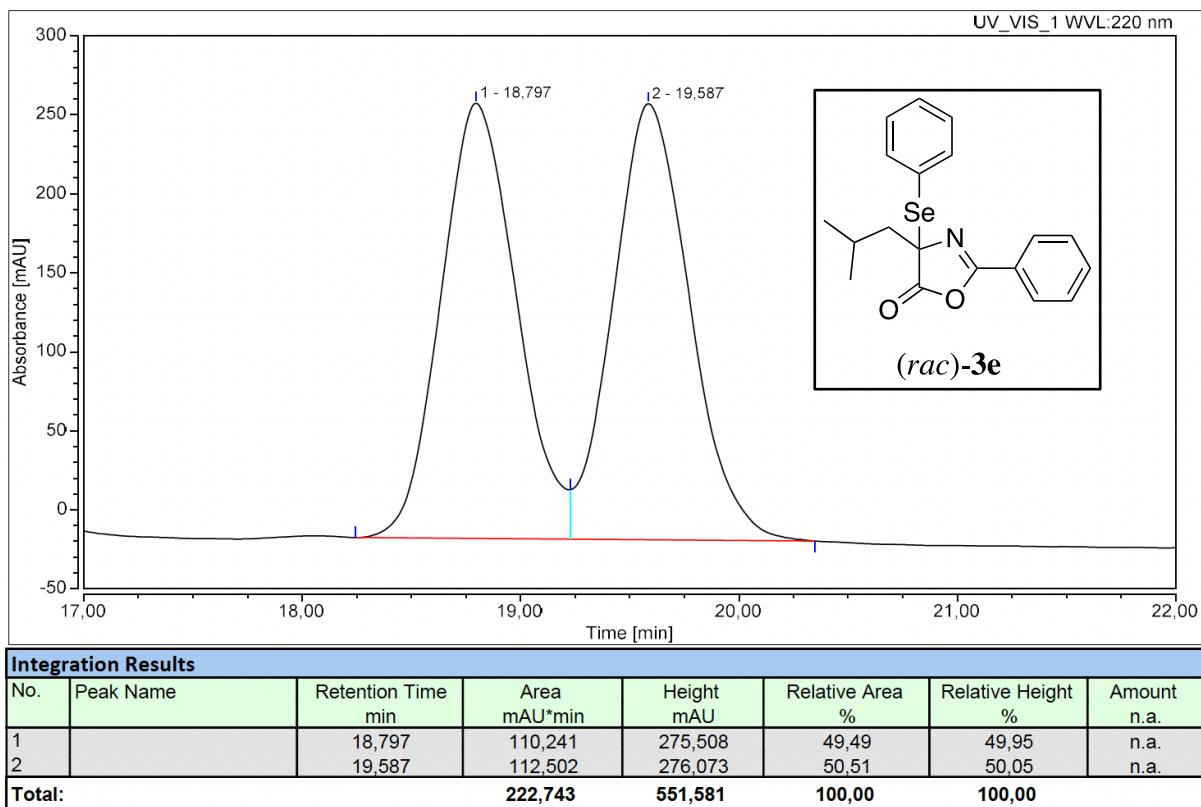

**HPLC traces of **3f**** (Chiralpak AD-H, *n*-hexane:*i*-PrOH = 20:1, flow rate 0.7 mL/min, 10 °C,  $\lambda$  = 220 nm)

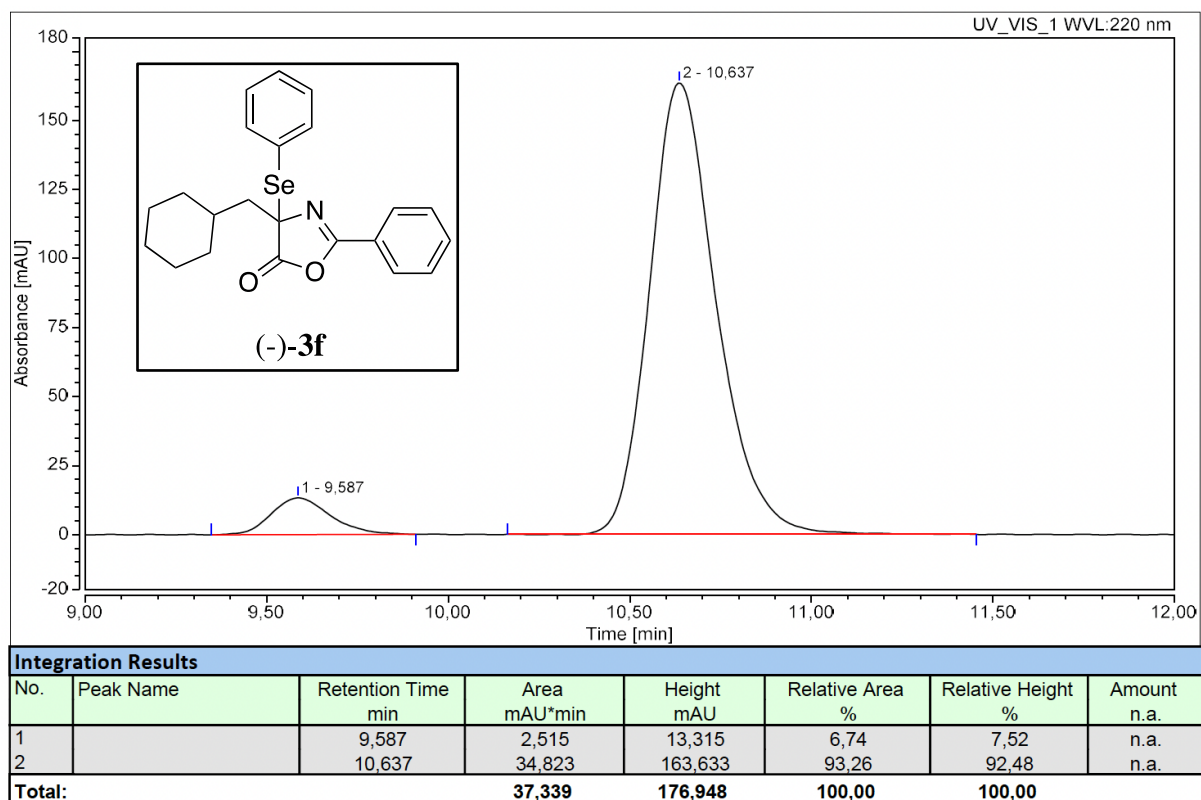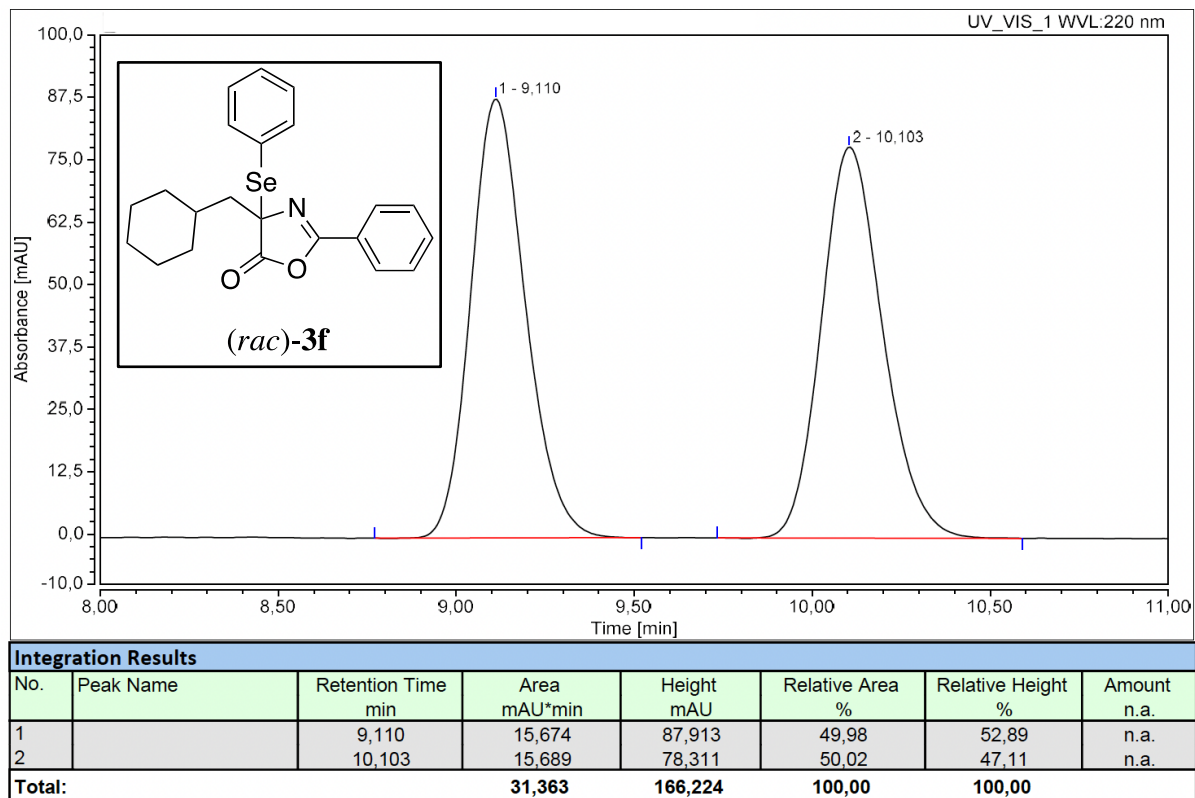

**HPLC traces of **3g**** (Chiralpak AD-H, *n*-hexane:*i*-PrOH = 20:1, flow rate 0.3 mL/min, 10 °C,  $\lambda$  = 220 nm)

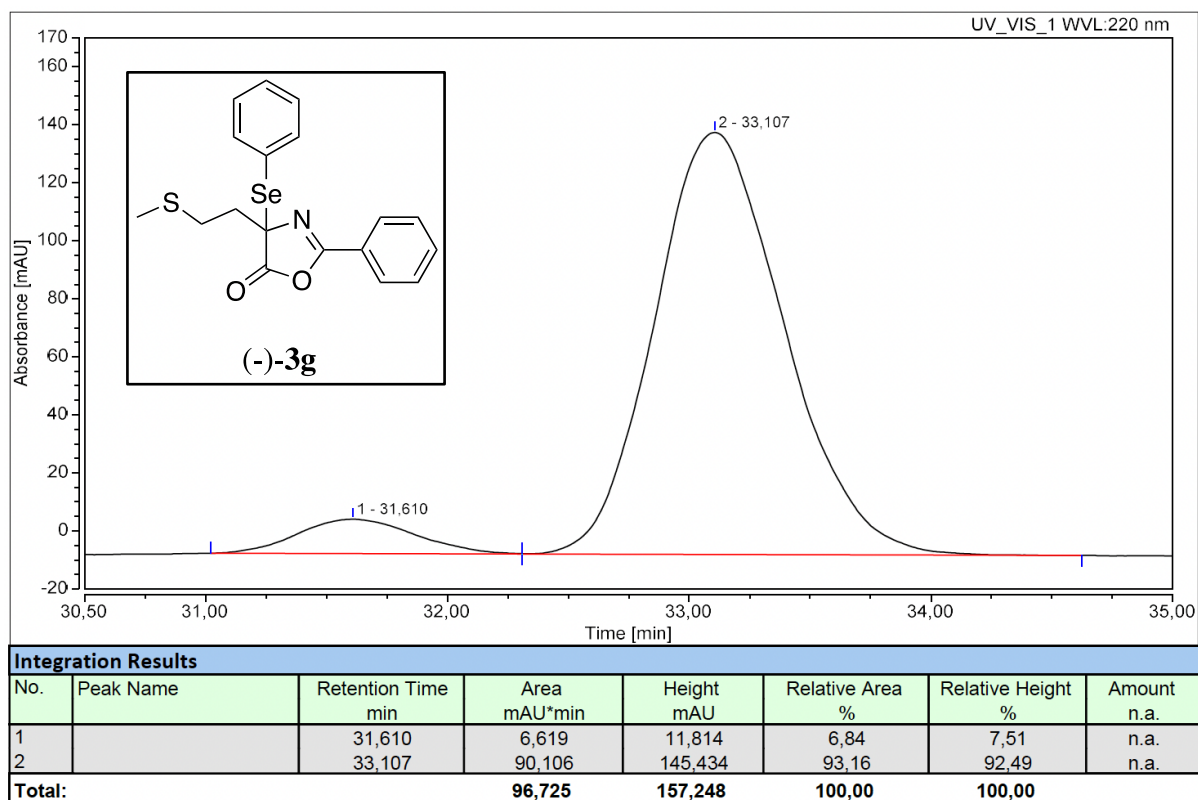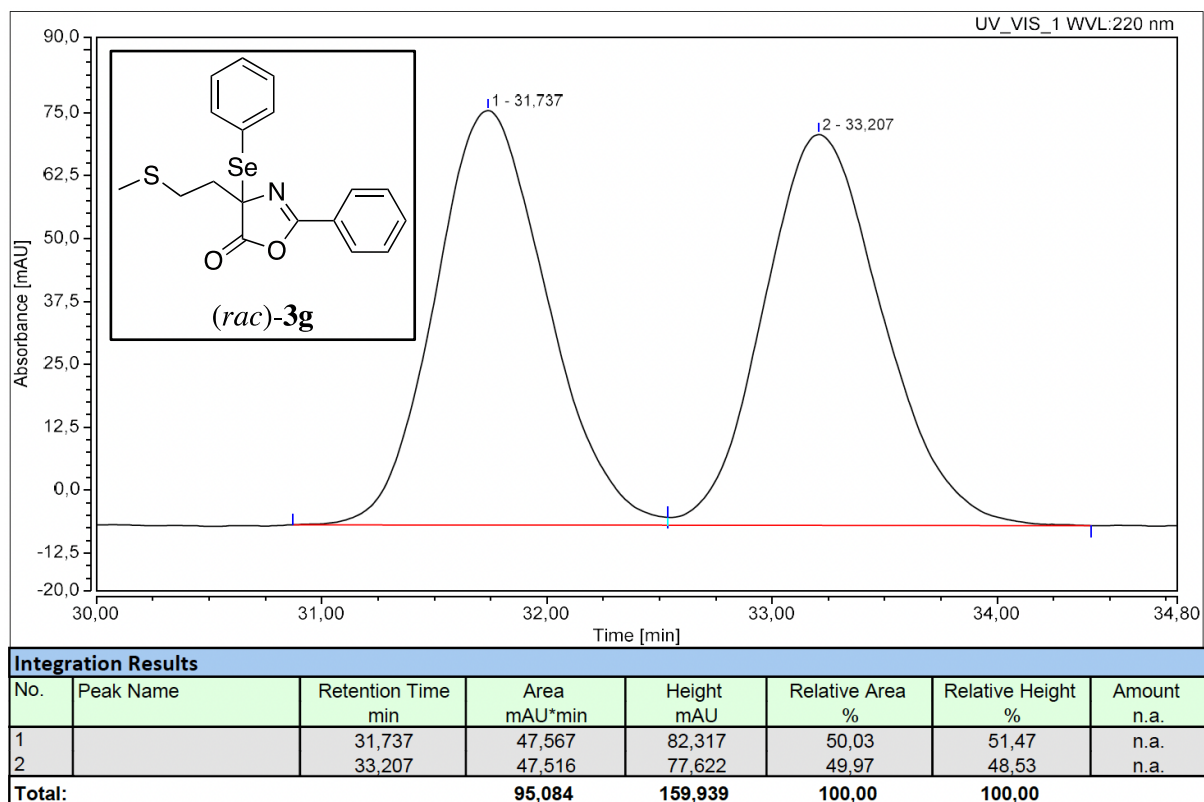

**HPLC traces of **3h**** (Chiralpak AD-H, *n*-hexane:*i*-PrOH = 20:1, flow rate 0.3 mL/min, 10 °C,  $\lambda$  = 220 nm)

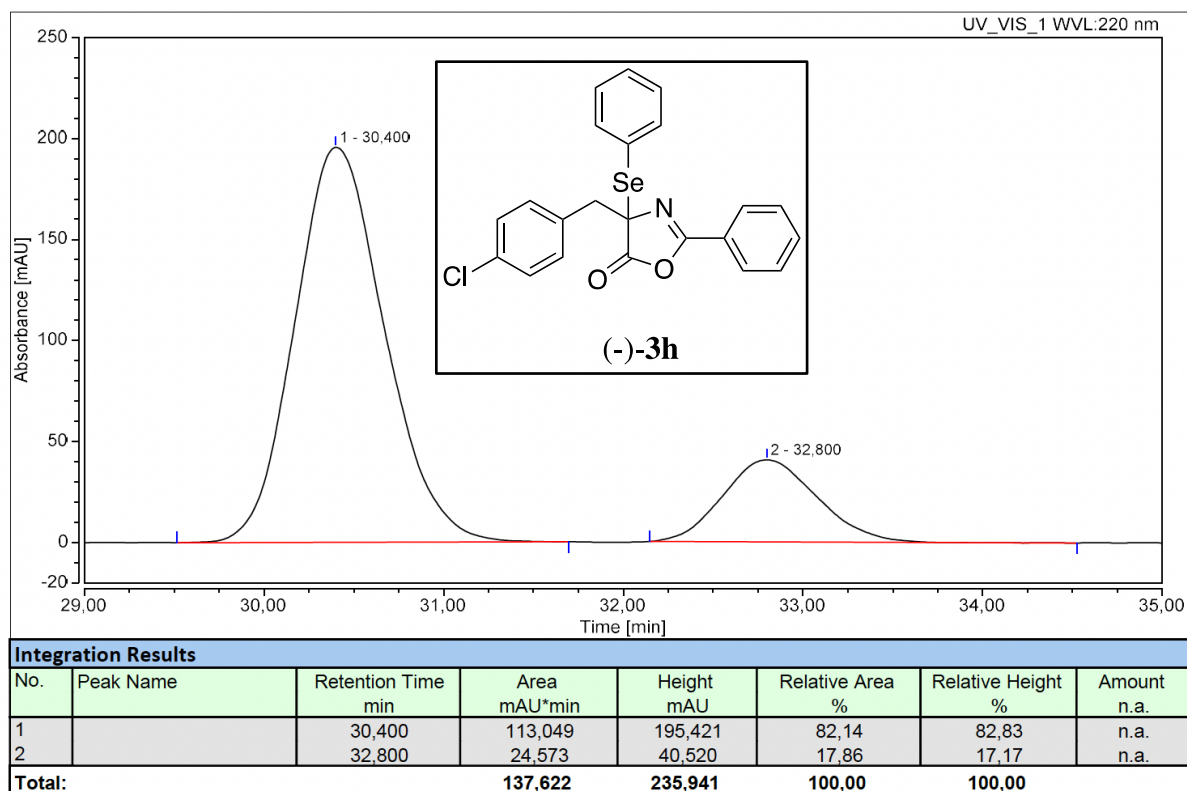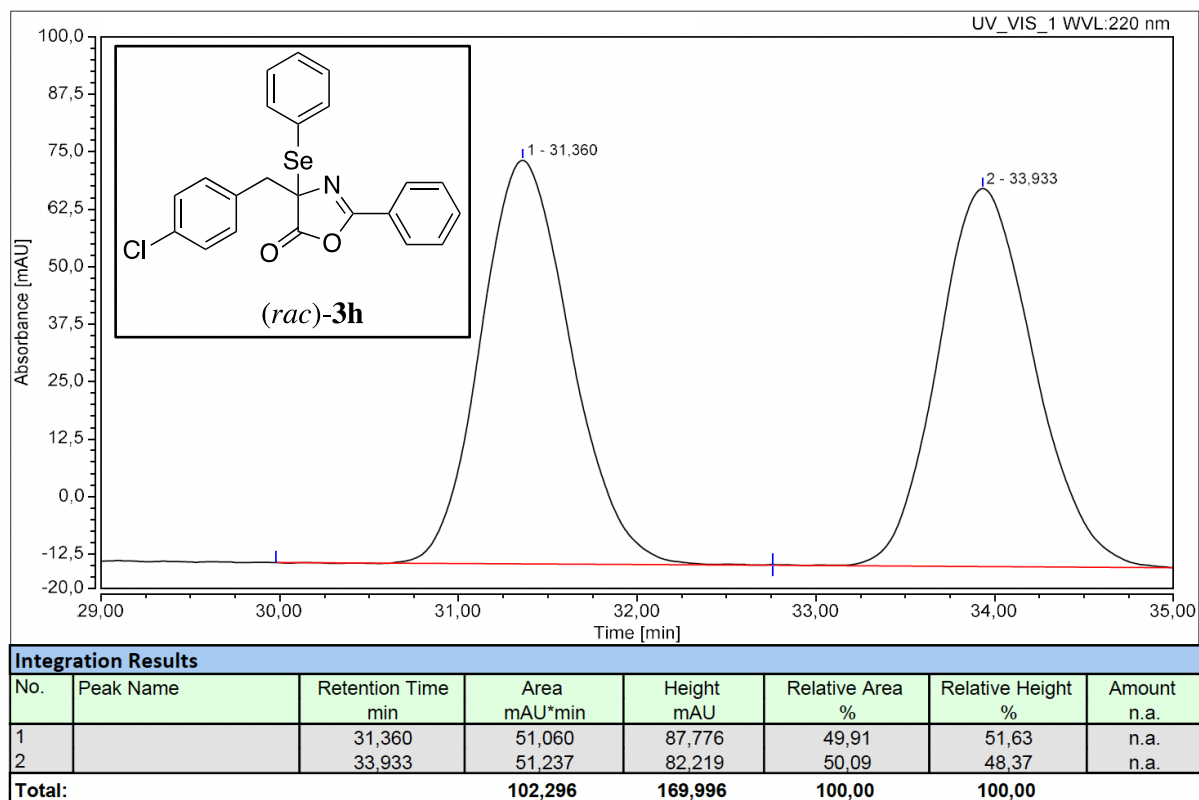

**HPLC traces of **3i**** (Chiralpak AD-H, *n*-hexane:*i*-PrOH = 20:1, flow rate 0.7 mL/min, 10 °C,  $\lambda$  = 220 nm)

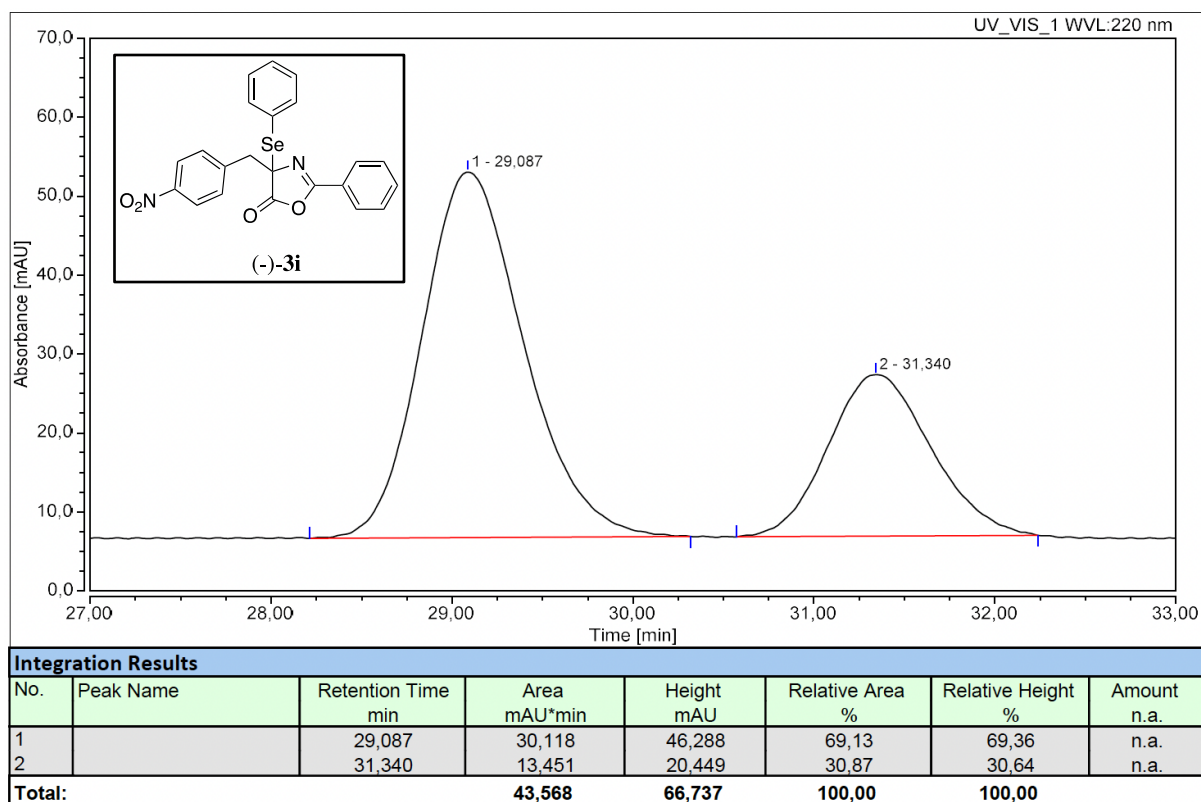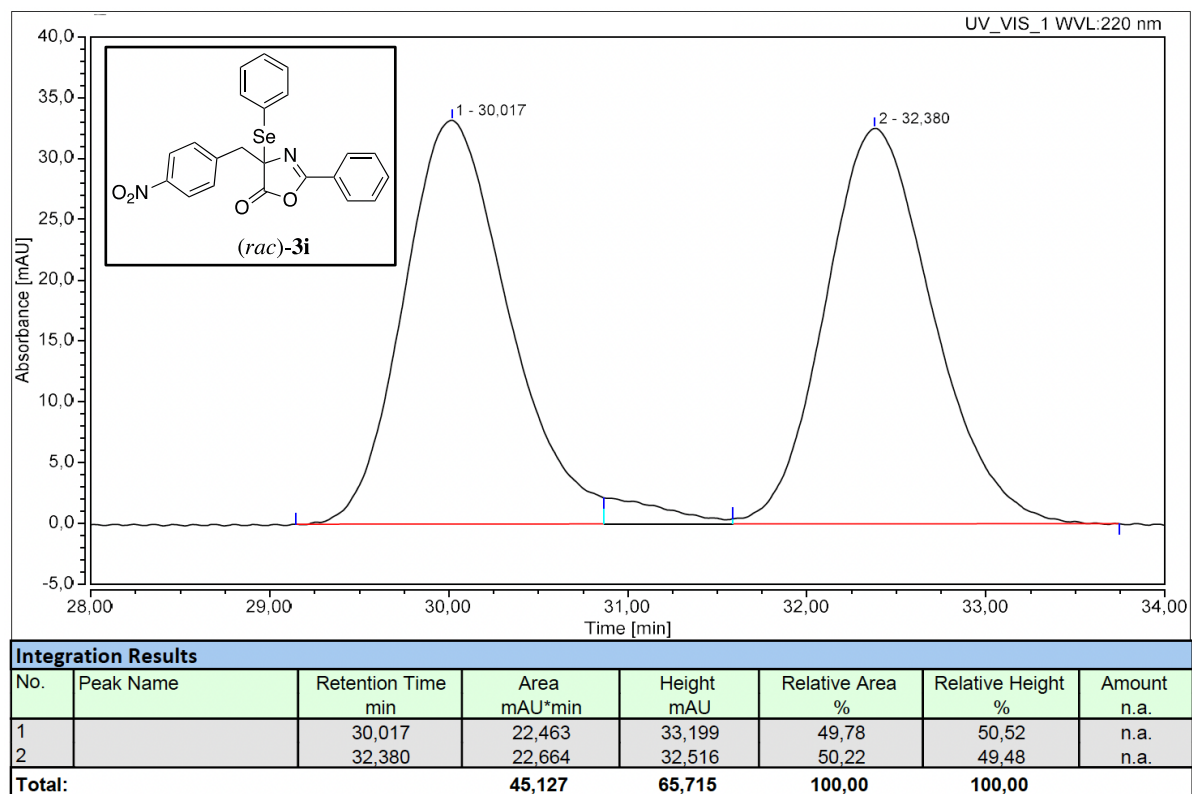

**HPLC traces of **3j**** (Chiralpak AD-H, *n*-hexane:*i*-PrOH = 20:1, flow rate 0.3 mL/min, 10 °C,  $\lambda$  = 220 nm)

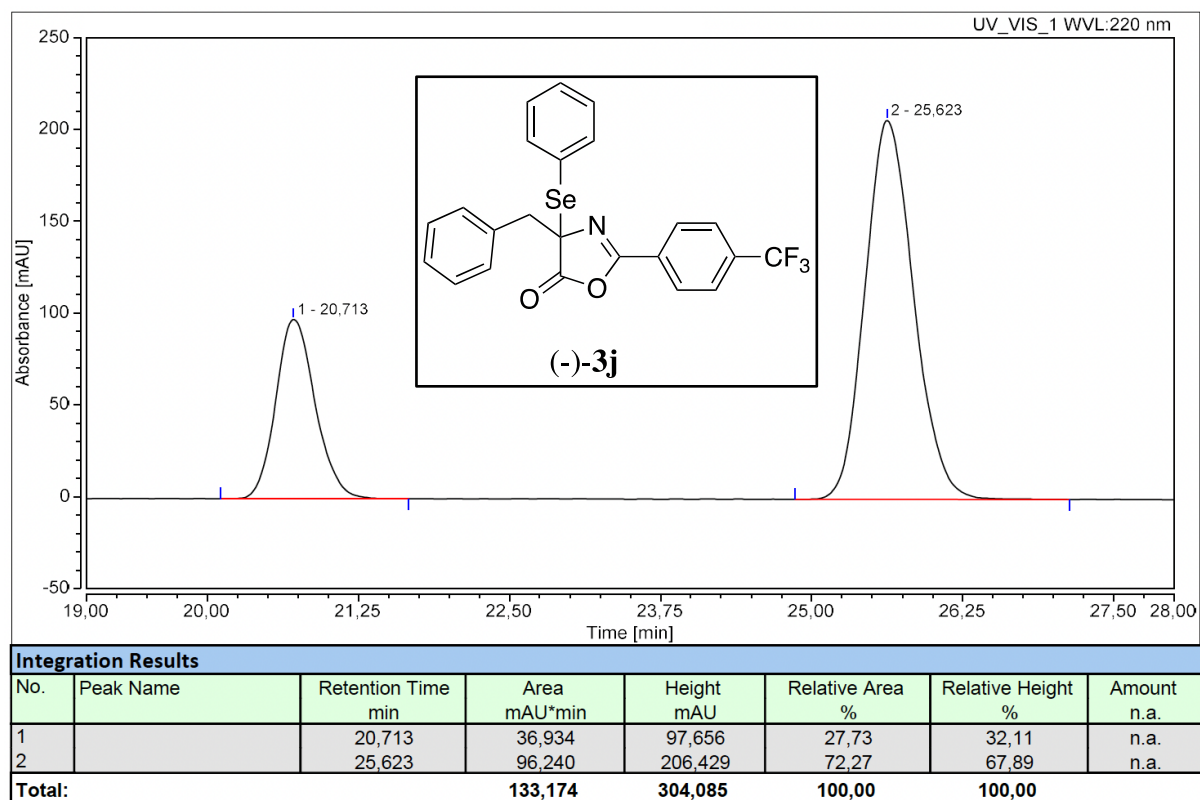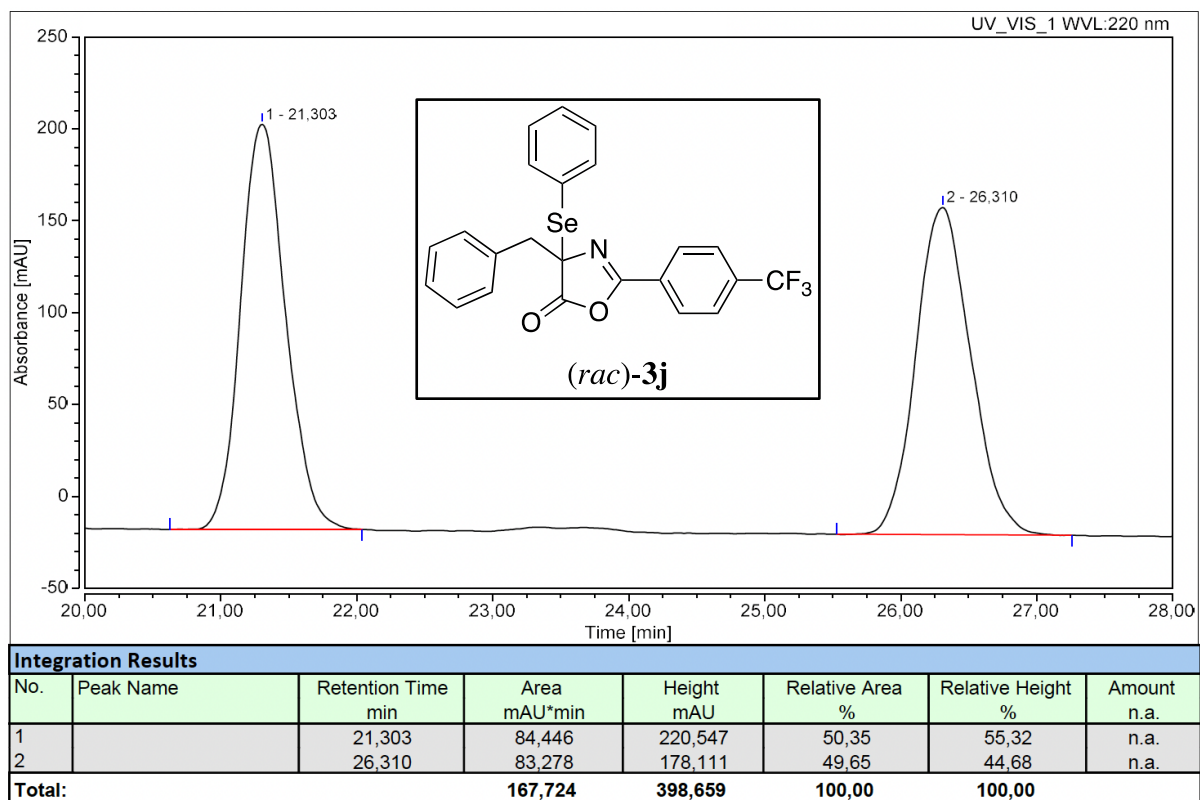

**HPLC traces of **3k**** (Chiralpak AD-H, *n*-hexane:*i*-PrOH = 20:1, flow rate 0.7 mL/min, 10 °C,  $\lambda$  = 220 nm)

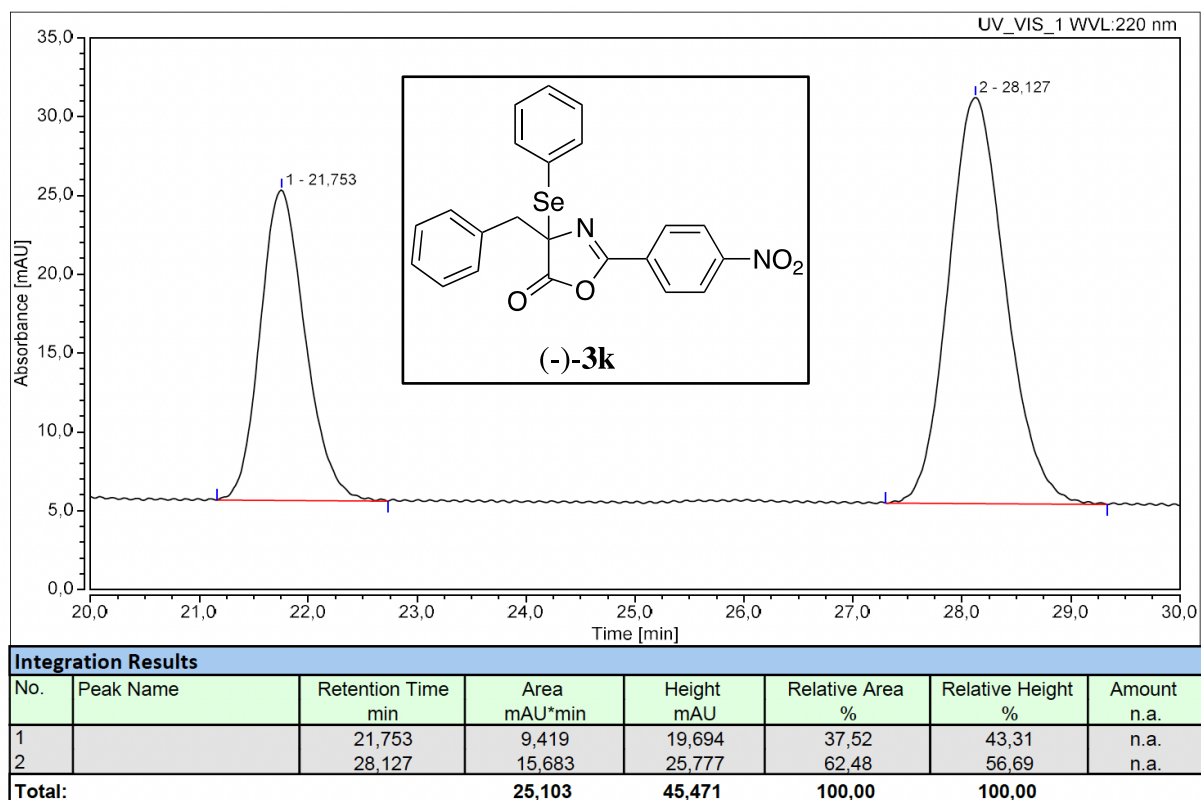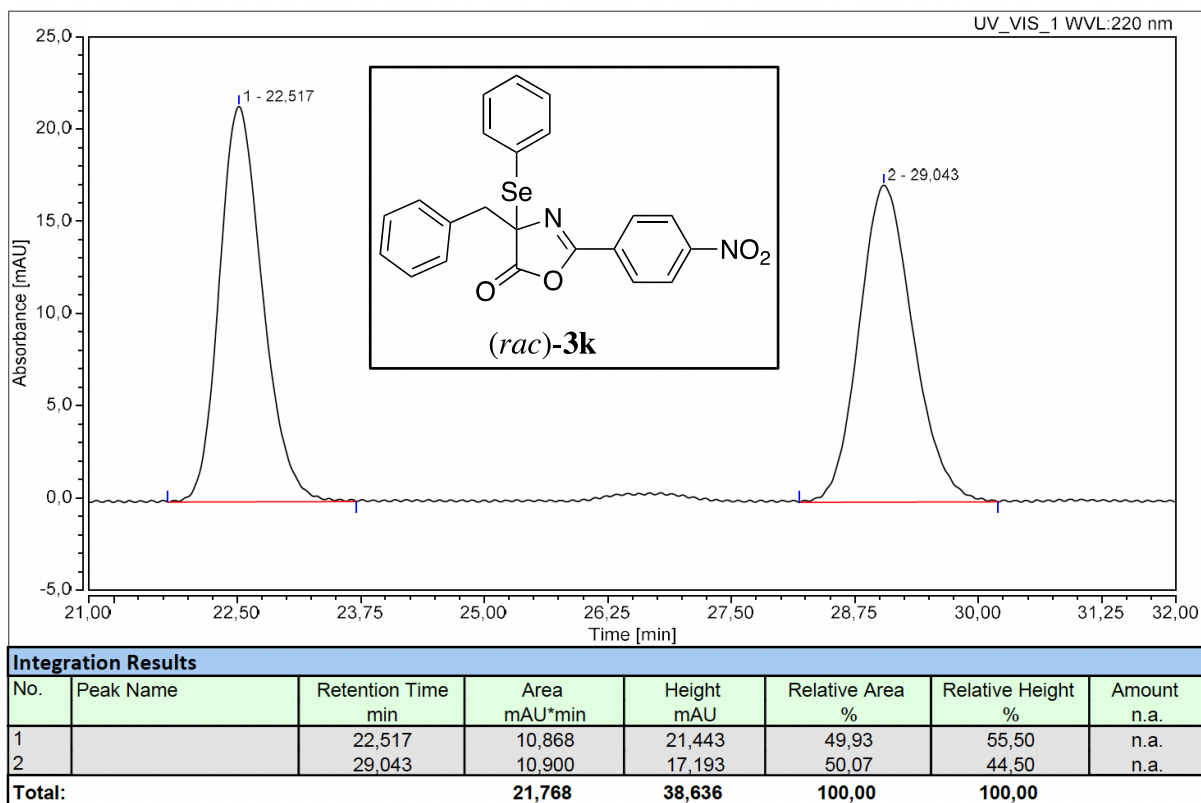

**HPLC traces of **3I**** (Chiralpak AD-H, *n*-hexane:*i*-PrOH = 20:1, flow rate 0.7 mL/min, 10 °C,  $\lambda$  = 270 nm)

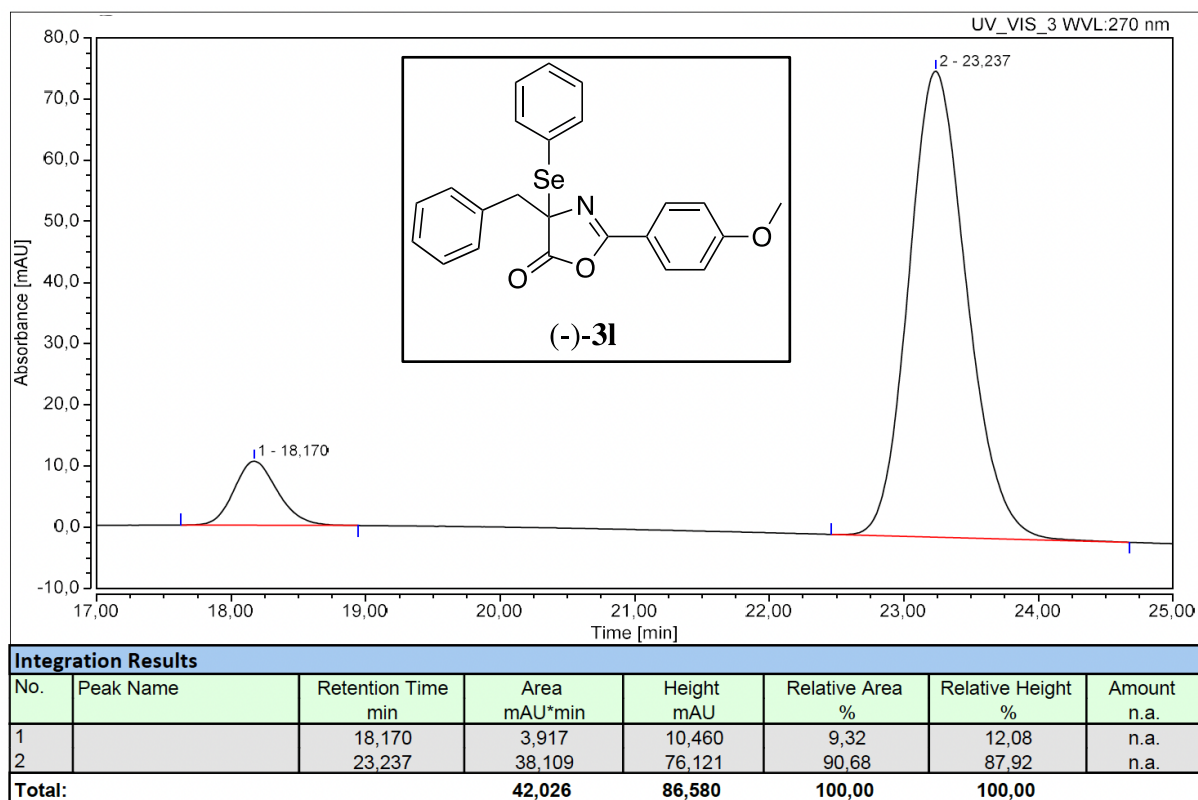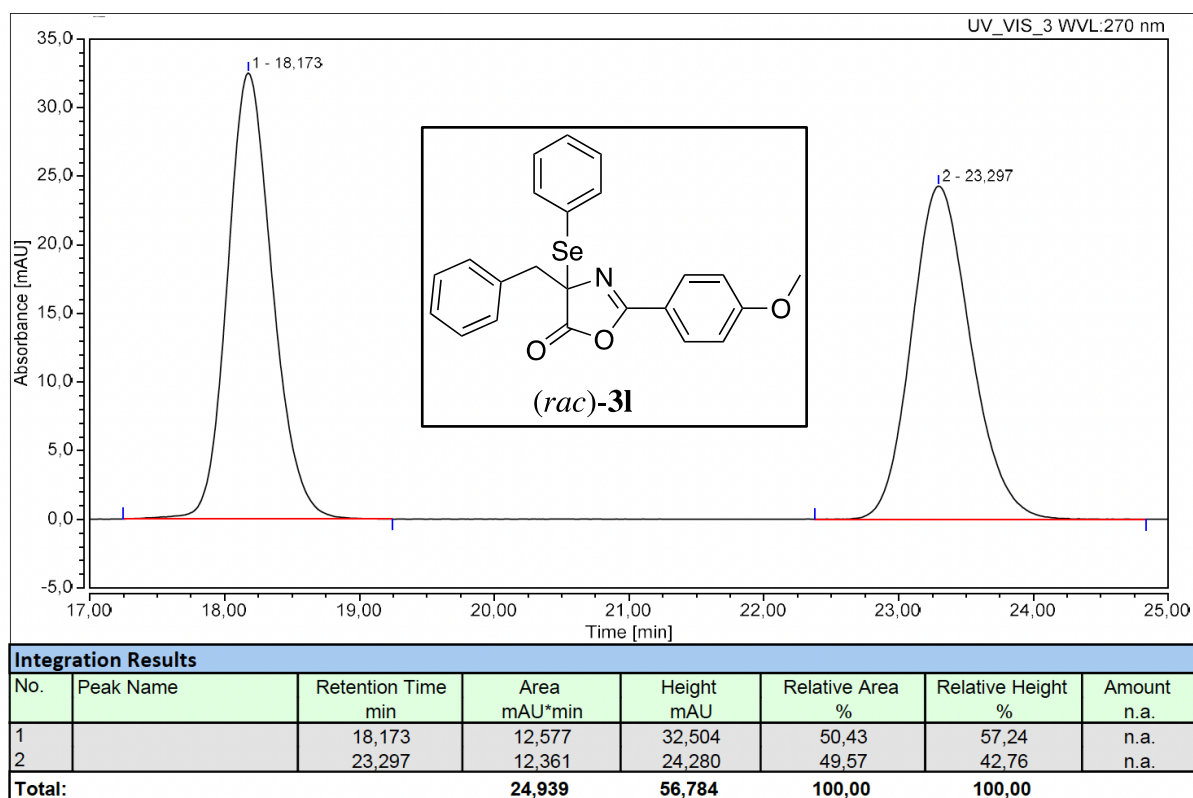

**HPLC traces of **3m**** (Chiralpak AD-H, *n*-hexane:*i*-PrOH = 20:1, flow rate 0.3 mL/min, 10 °C,  $\lambda$  = 220 nm)

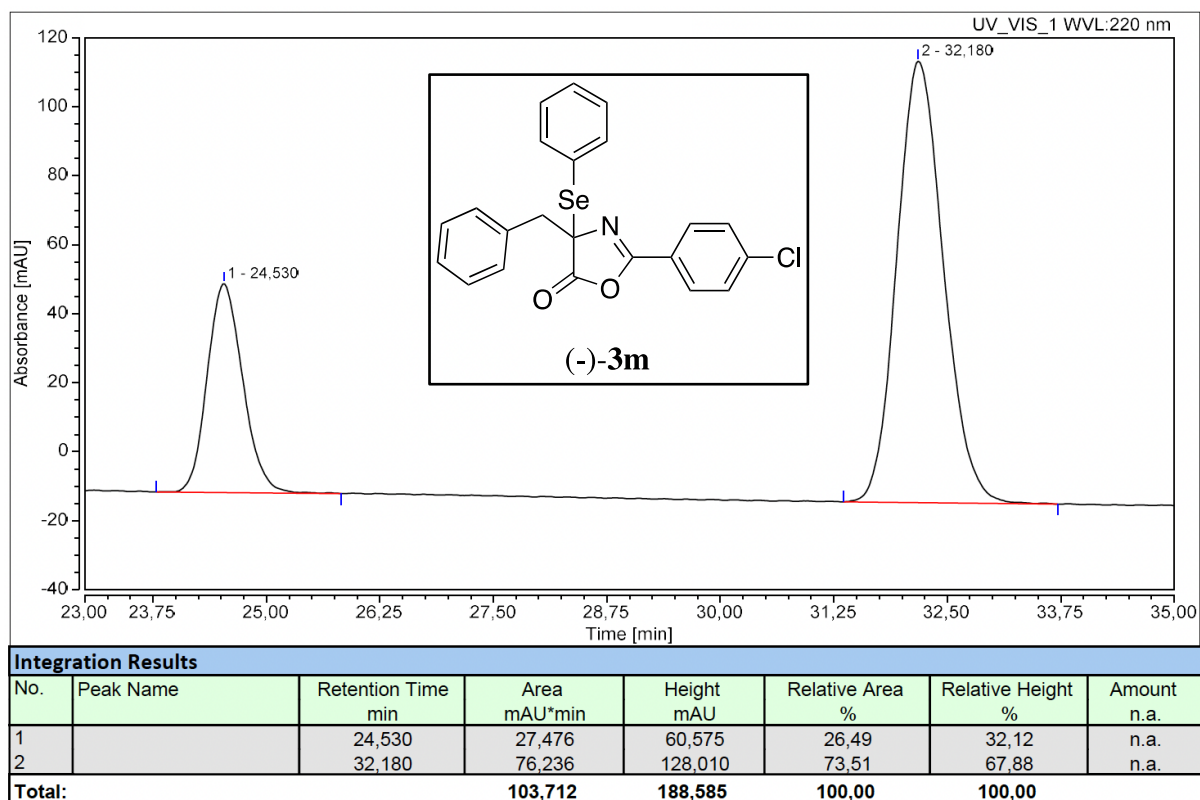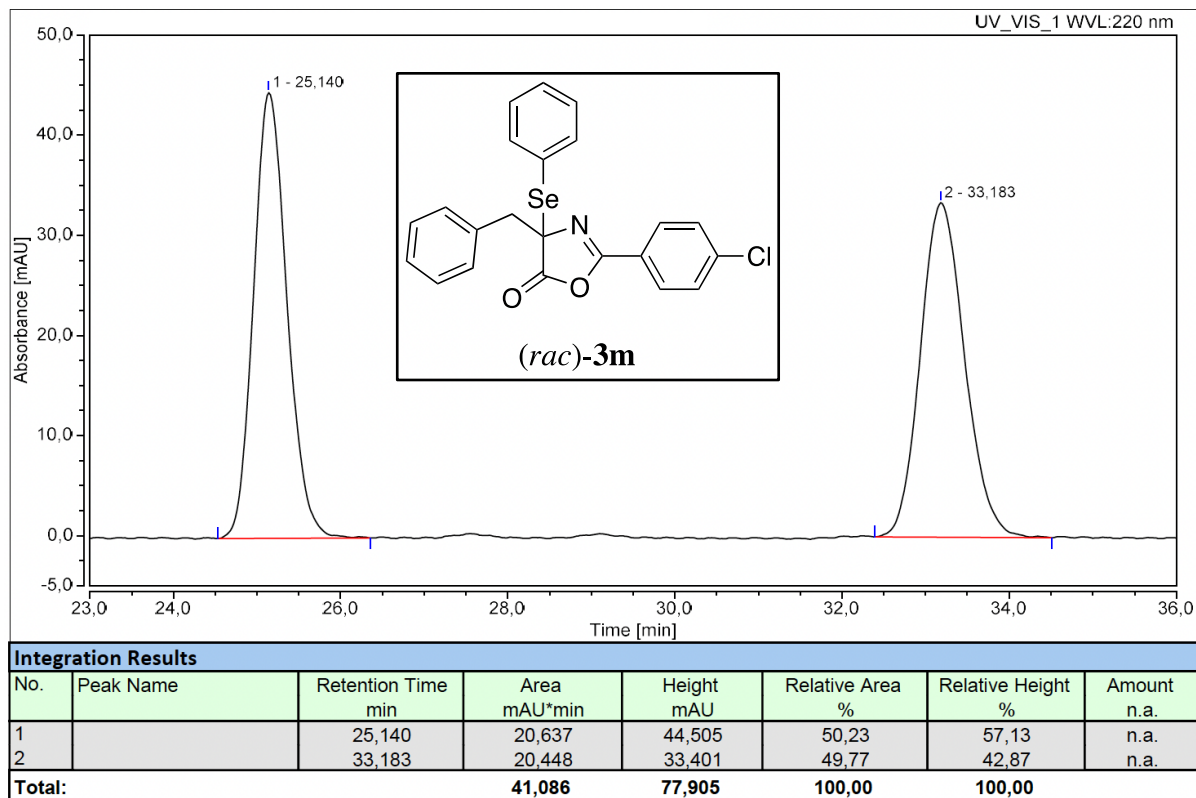

**HPLC traces of **3n**** (Chiralpak AD-H, *n*-hexane:*i*-PrOH = 20:1, flow rate 0.7 mL/min, 10 °C,  $\lambda$  = 220 nm)

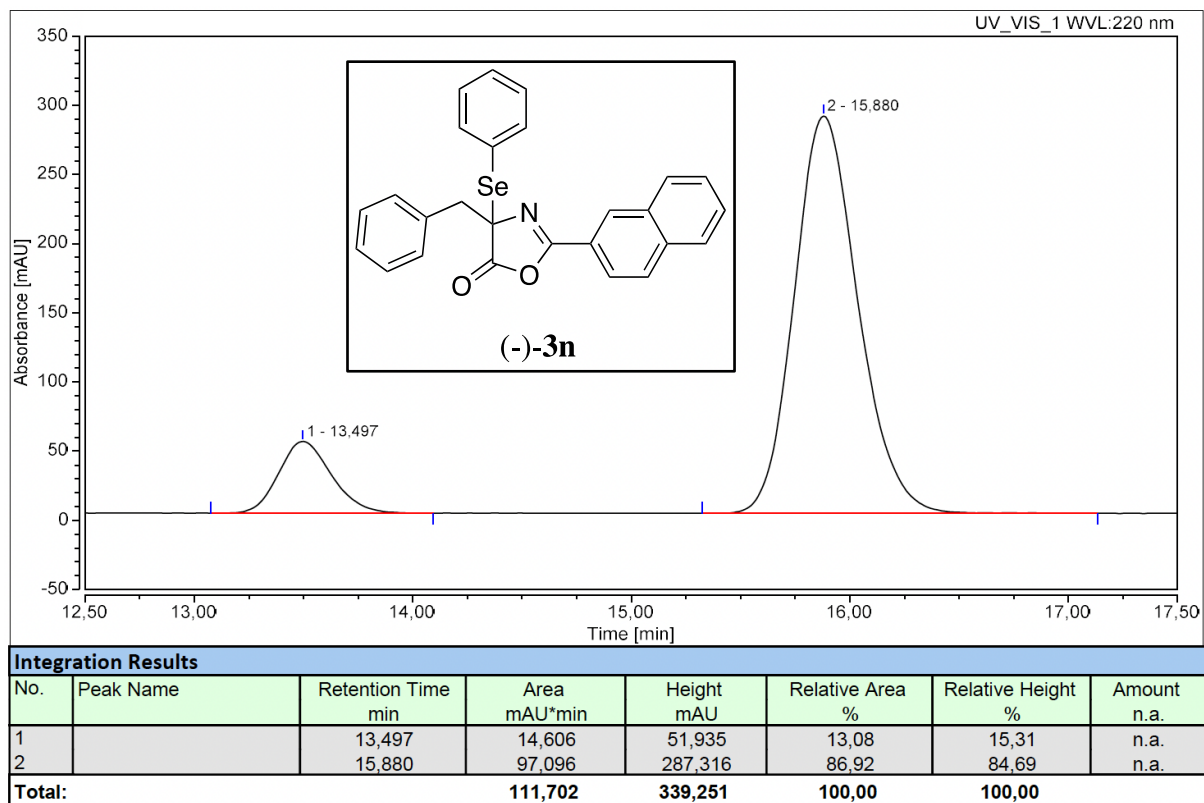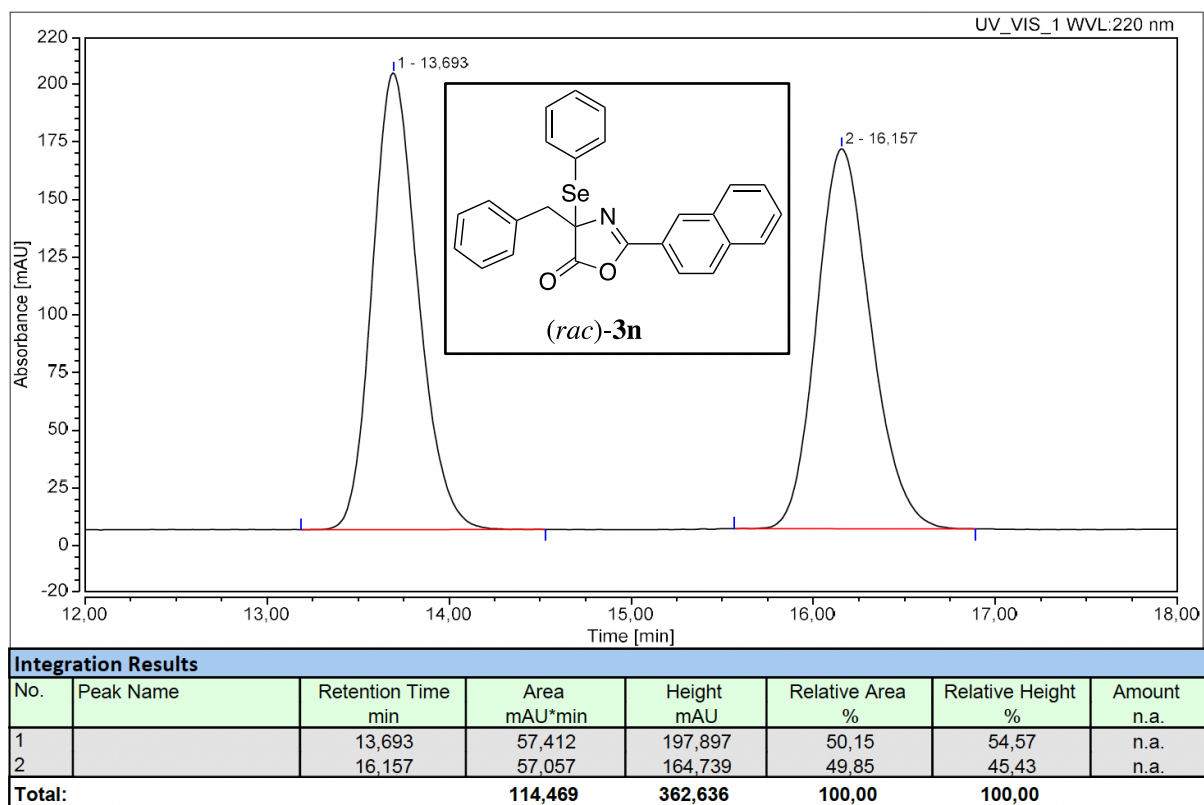

**HPLC traces of **3o**** (Chiralpak AD-H, *n*-hexane:*i*-PrOH = 20:1, flow rate 0.3 mL/min, 10 °C,  $\lambda$  = 220 nm)

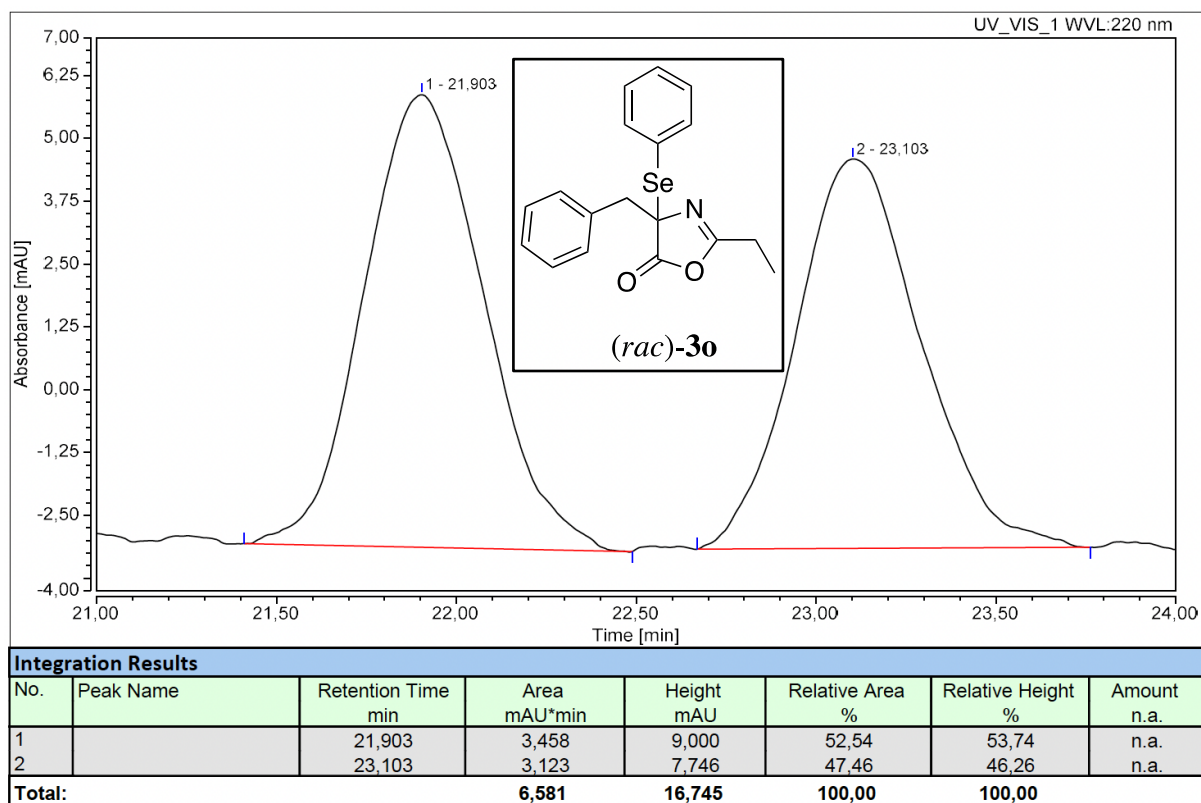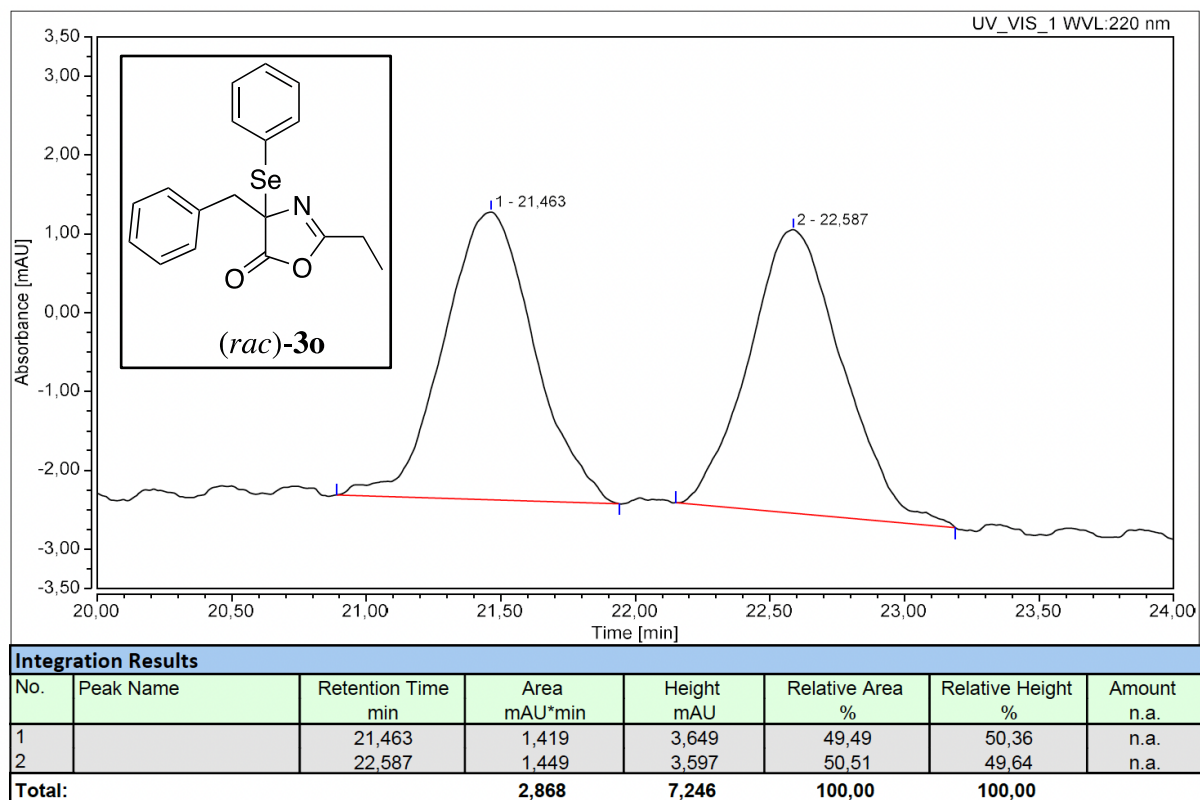

**HPLC traces of **3p**** (Chiralpak AD-H, *n*-hexane:*i*-PrOH = 20:1, flow rate 0.3 mL/min, 10 °C,  $\lambda$  = 220 nm)

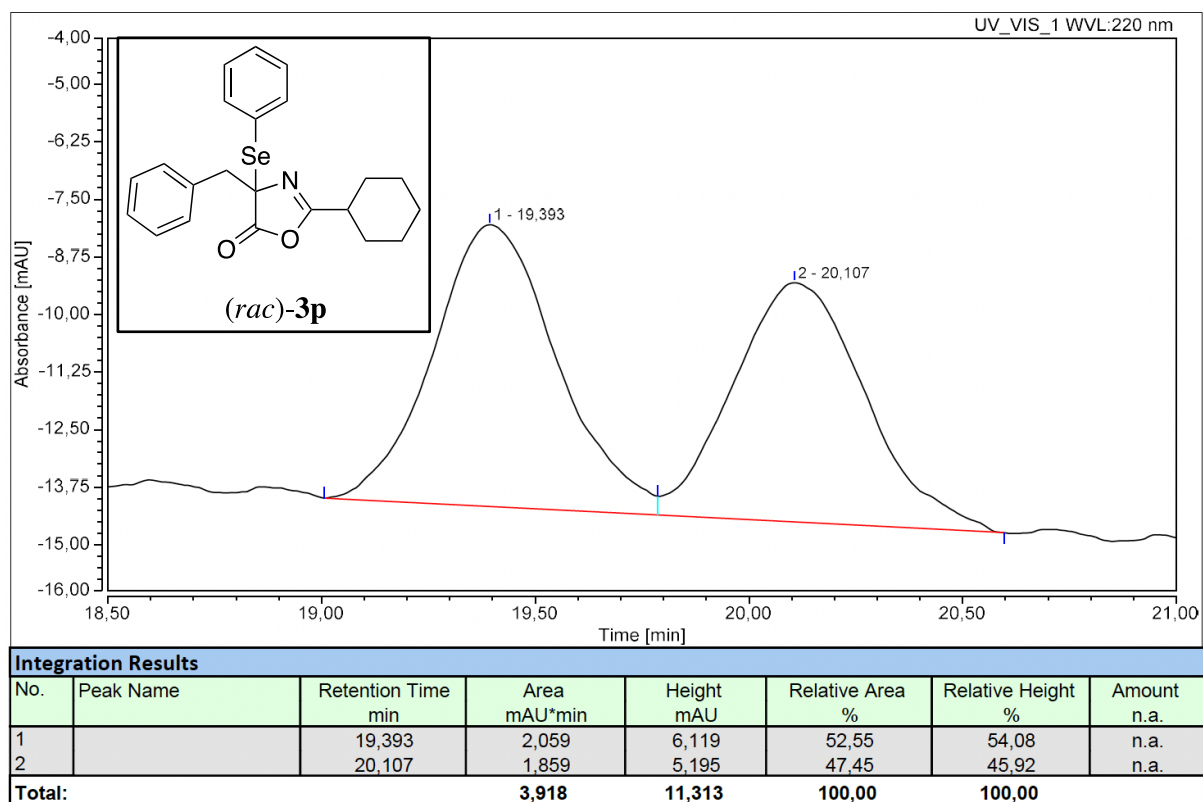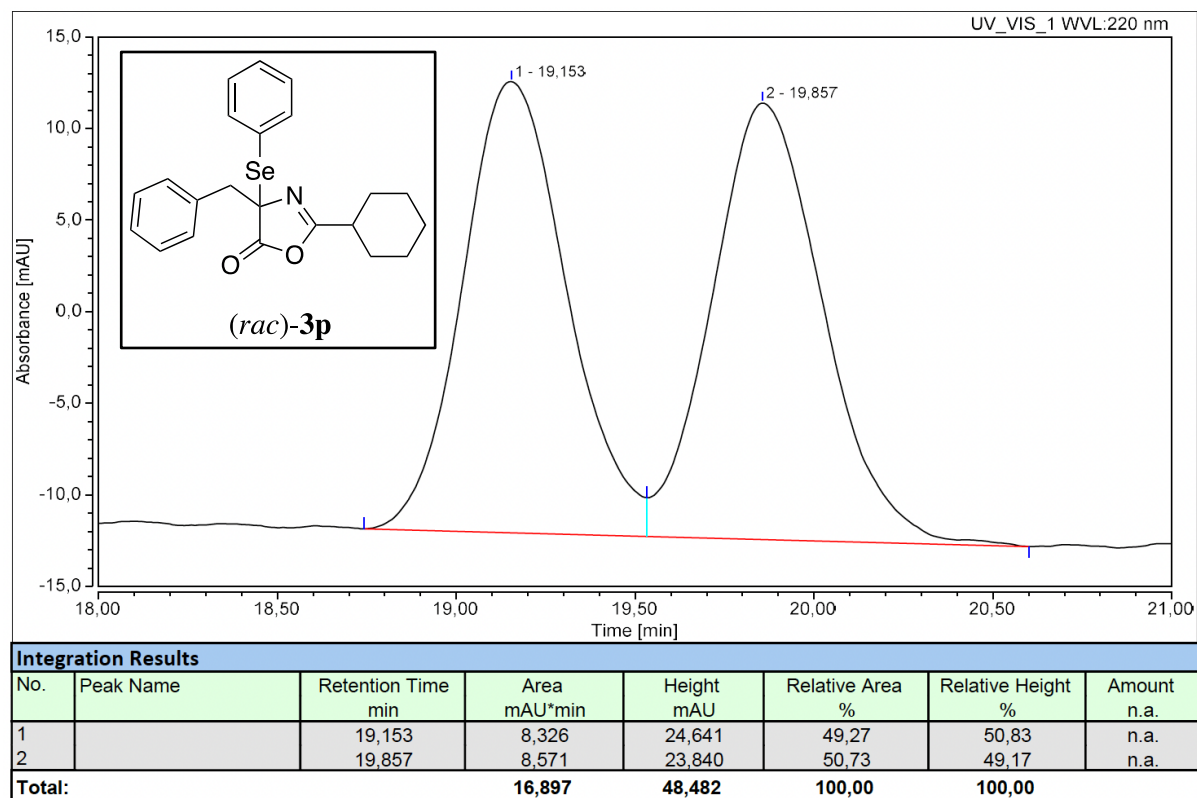

**HPLC traces of **3q**** (Chiralpak AD-H, *n*-hexane:*i*-PrOH = 20:1, flow rate 0.7 mL/min, 10 °C,  $\lambda$  = 220 nm)

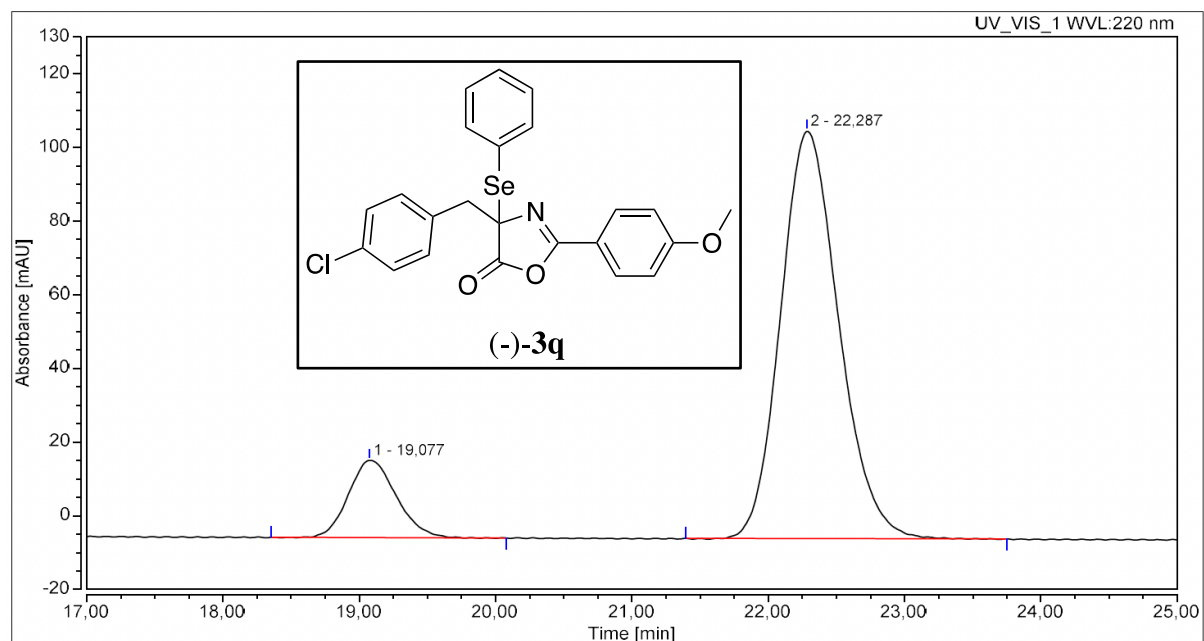

| Integration Results |           |                       |                 |               |                    |                      |                |
|---------------------|-----------|-----------------------|-----------------|---------------|--------------------|----------------------|----------------|
| No.                 | Peak Name | Retention Time<br>min | Area<br>mAU*min | Height<br>mAU | Relative Area<br>% | Relative Height<br>% | Amount<br>n.a. |
| 1                   |           | 19,077                | 8,522           | 20,974        | 13,50              | 15,94                | n.a.           |
| 2                   |           | 22,287                | 54,584          | 110,590       | 86,50              | 84,06                | n.a.           |
| Total:              |           |                       | 63,106          | 131,565       | 100,00             | 100,00               |                |

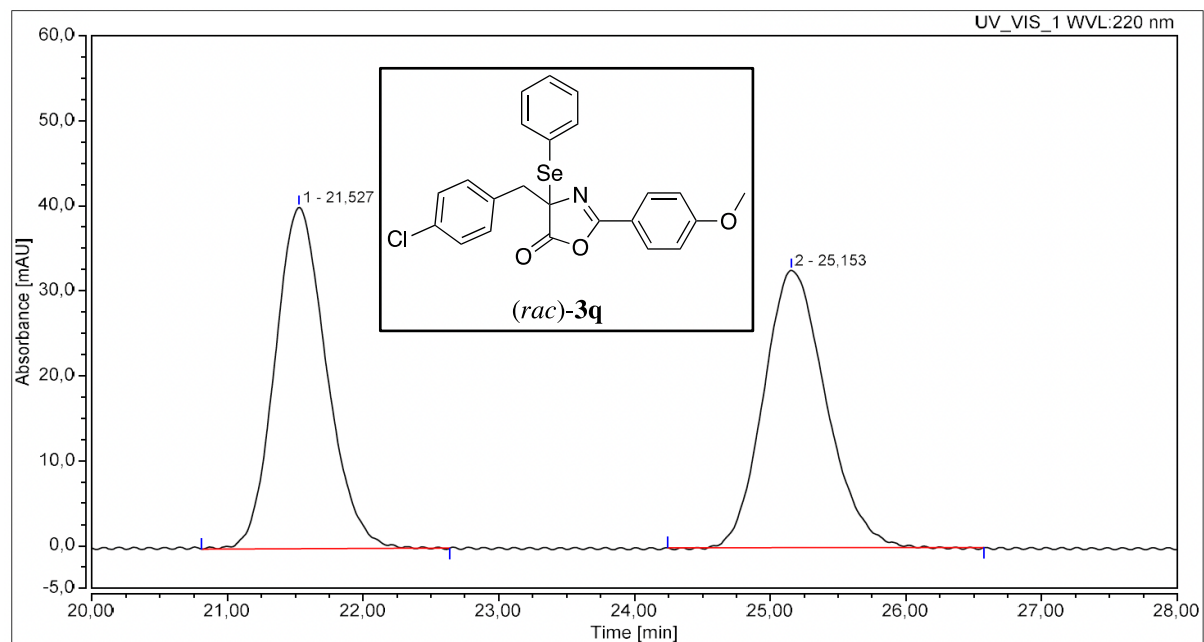

| Integration Results |           |                       |                 |               |                    |                      |                |
|---------------------|-----------|-----------------------|-----------------|---------------|--------------------|----------------------|----------------|
| No.                 | Peak Name | Retention Time<br>min | Area<br>mAU*min | Height<br>mAU | Relative Area<br>% | Relative Height<br>% | Amount<br>n.a. |
| 1                   |           | 21,527                | 17,653          | 40,156        | 50,48              | 55,17                | n.a.           |
| 2                   |           | 25,153                | 17,318          | 32,632        | 49,52              | 44,83                | n.a.           |
| Total:              |           |                       | 34,971          | 72,787        | 100,00             | 100,00               |                |

**HPLC traces of **3r**** (Chiralpak AD-H, *n*-hexane:*i*-PrOH = 20:1, flow rate 1.2 mL/min, 10 °C,  $\lambda$  = 220 nm)

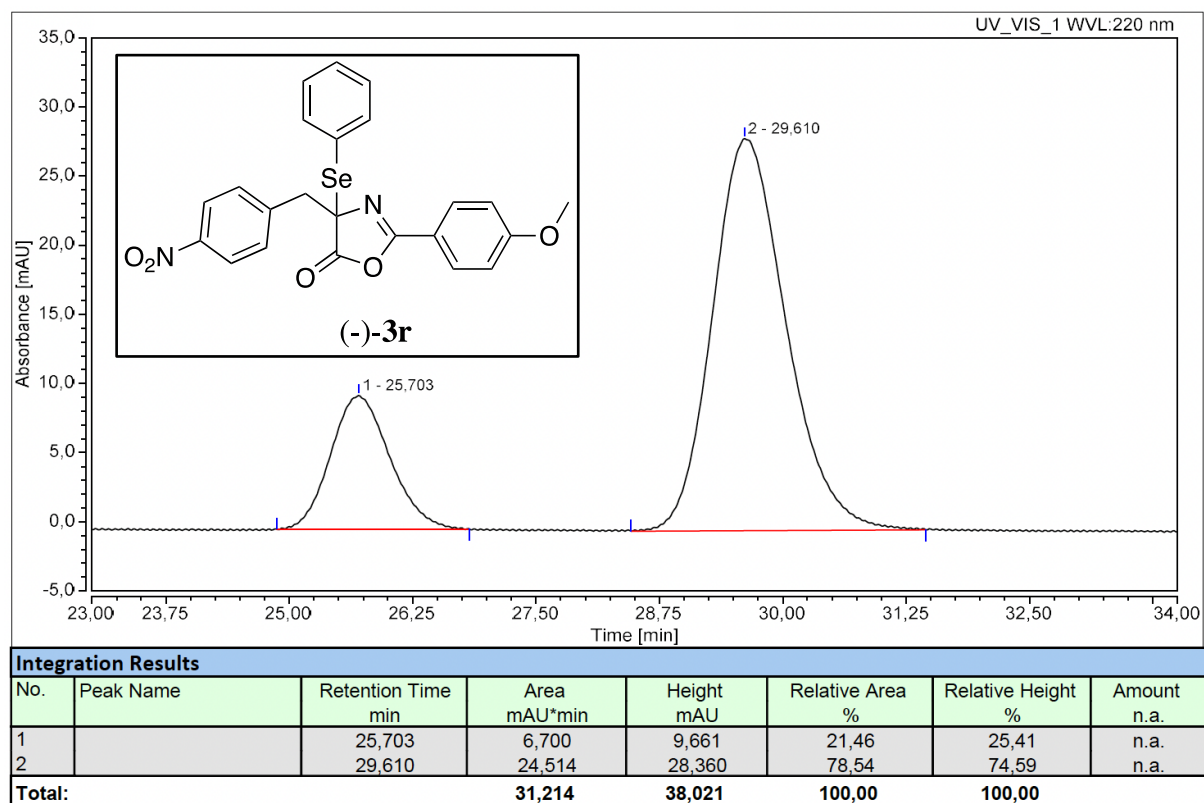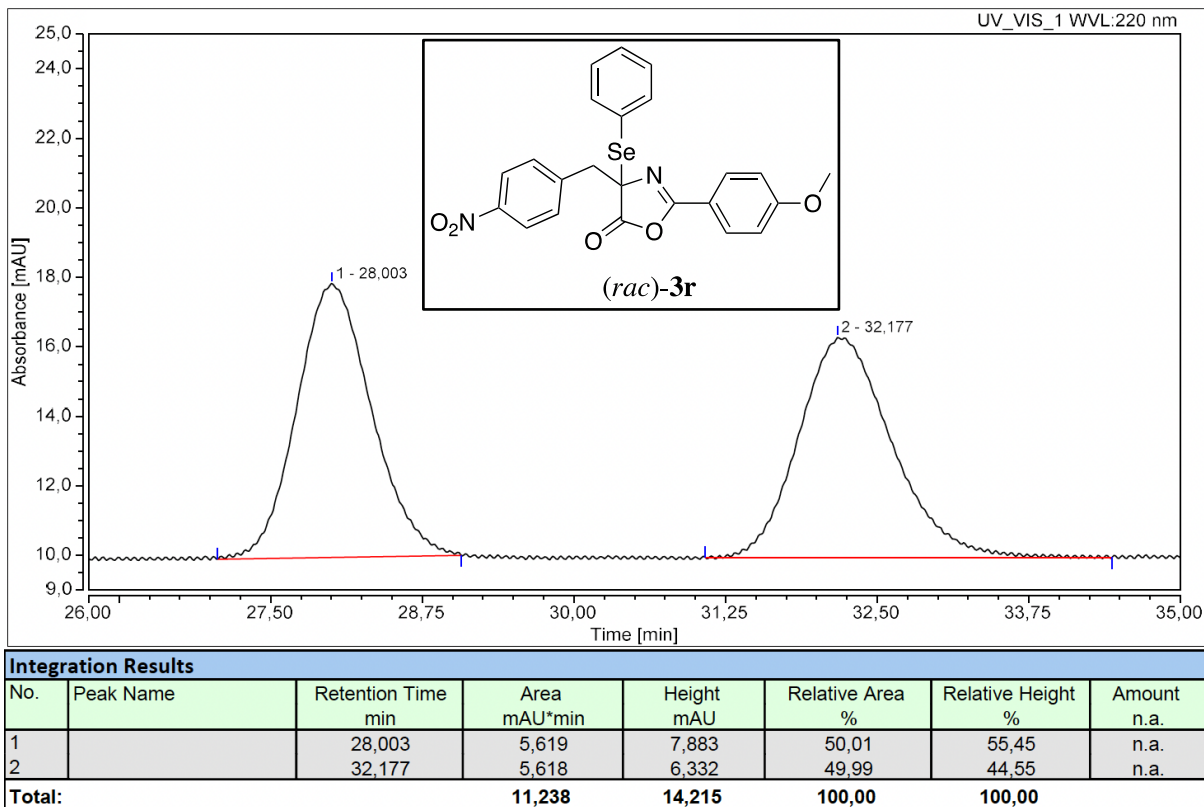

**HPLC traces of **3s**** (Chiralpak AD-H, *n*-hexane:*i*-PrOH = 20:1, flow rate 0.7 mL/min, 10 °C,  $\lambda$  = 220 nm)

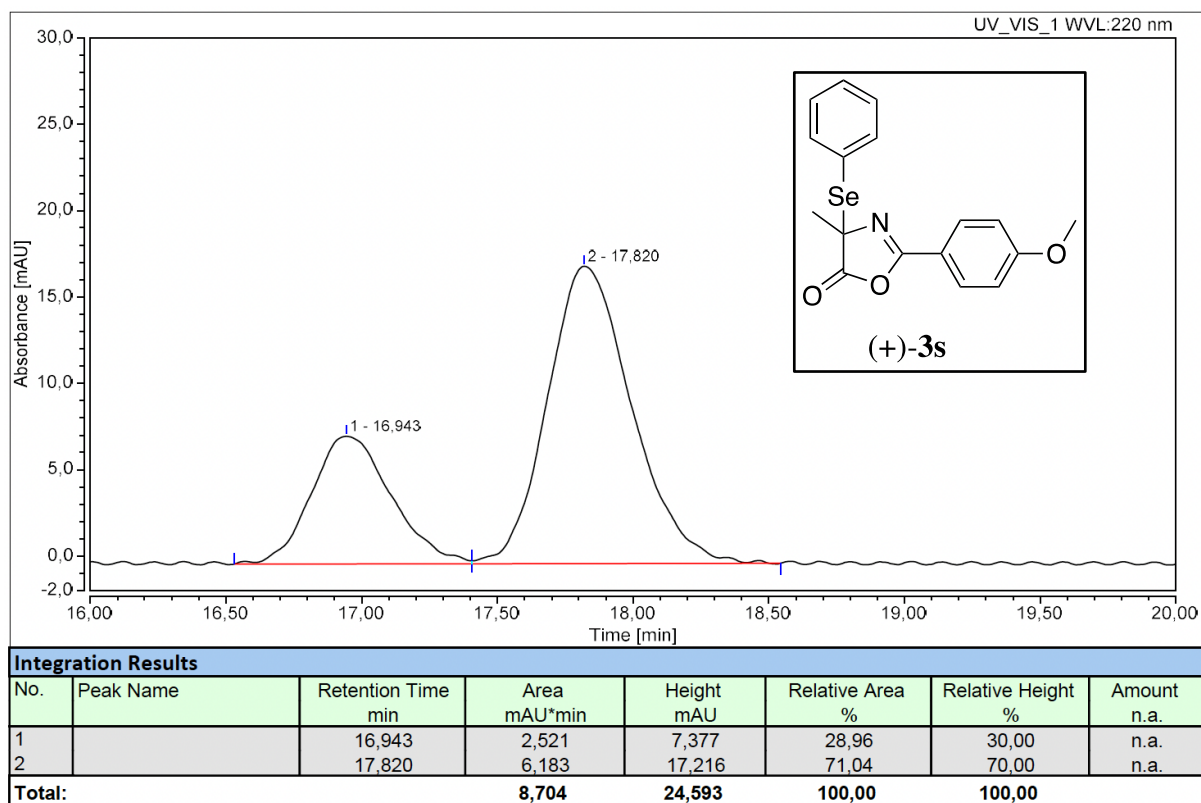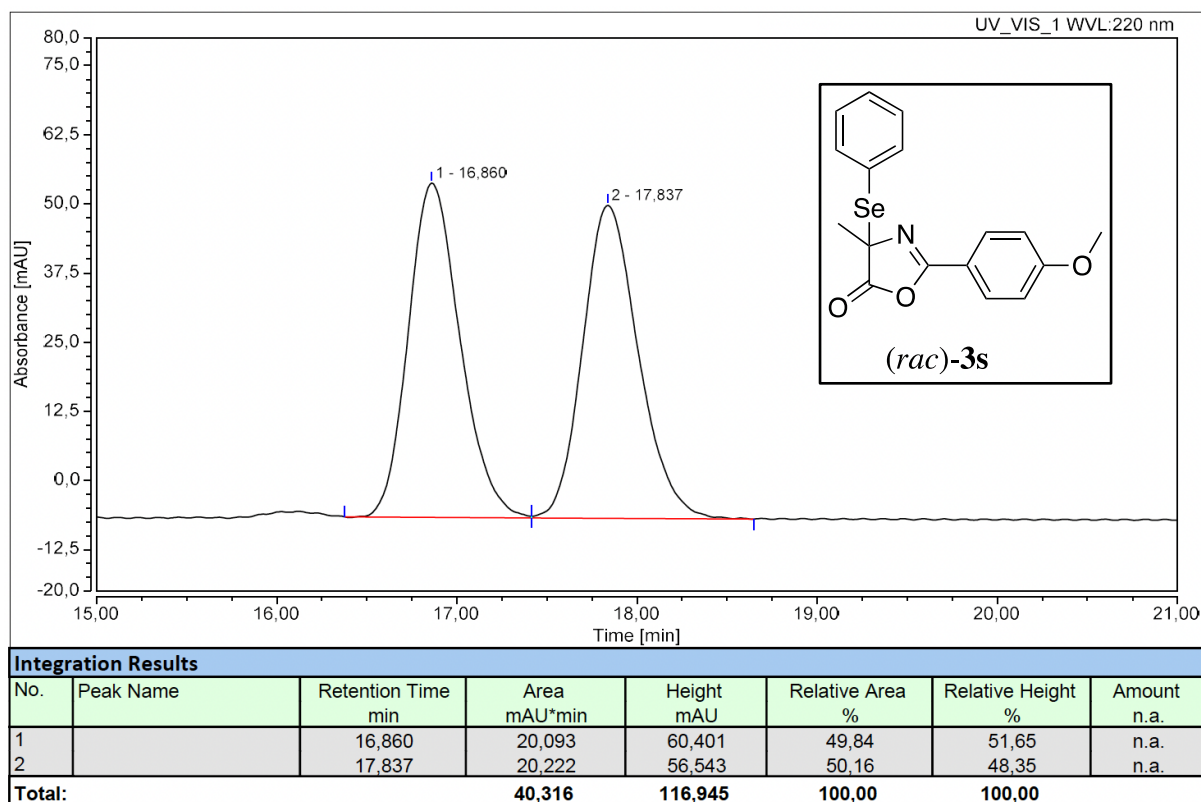

**HPLC traces of **3t**** (Chiralpak AD-H, *n*-hexane:*i*-PrOH = 20:1, flow rate 0.7 mL/min, 10 °C,  $\lambda$  = 220 nm)

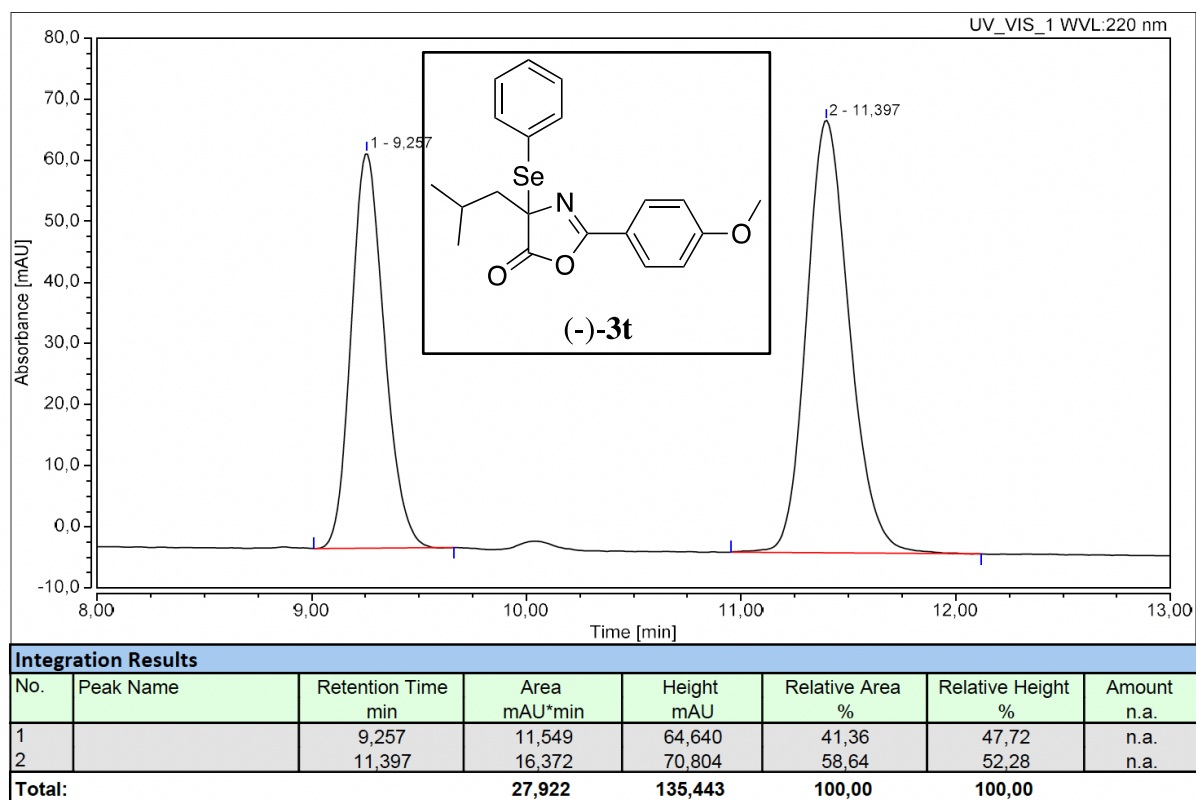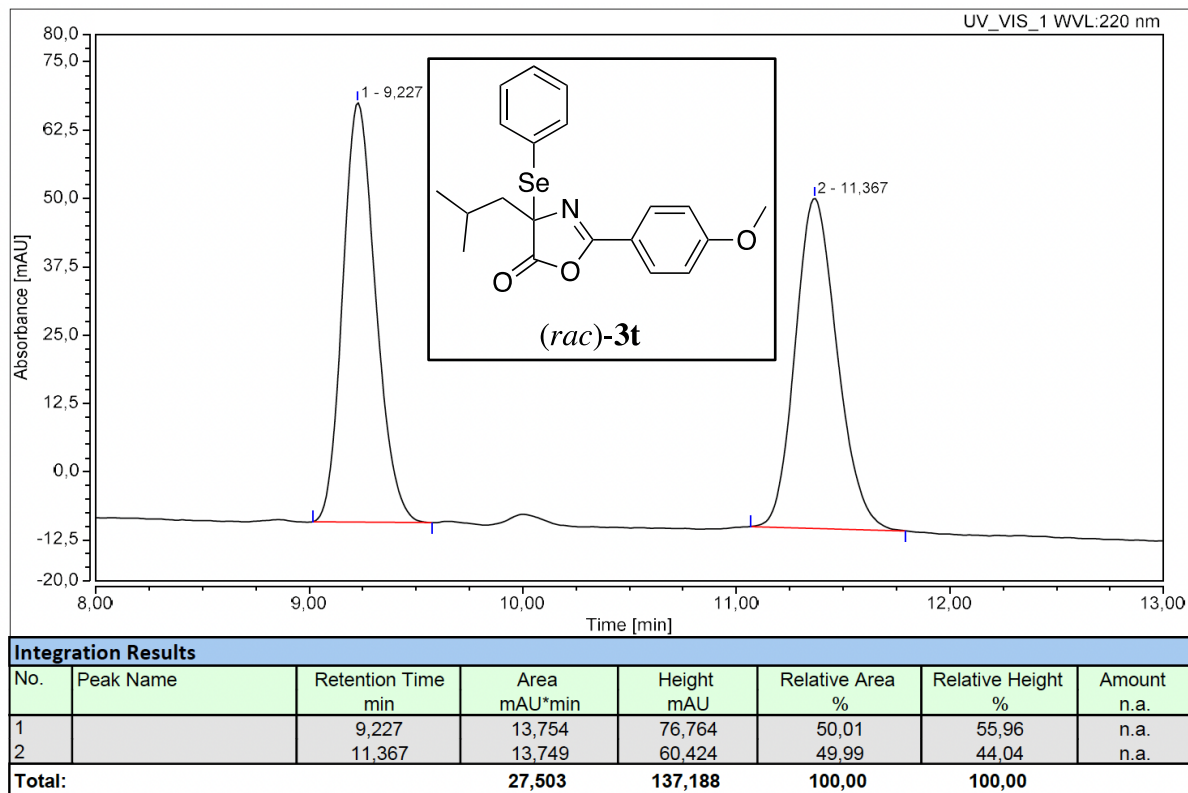

**HPLC traces of **3u**** (Chiralpak AD-H, *n*-hexane:*i*-PrOH = 20:1, flow rate 0.7 mL/min, 10 °C,  $\lambda$  = 220 nm)

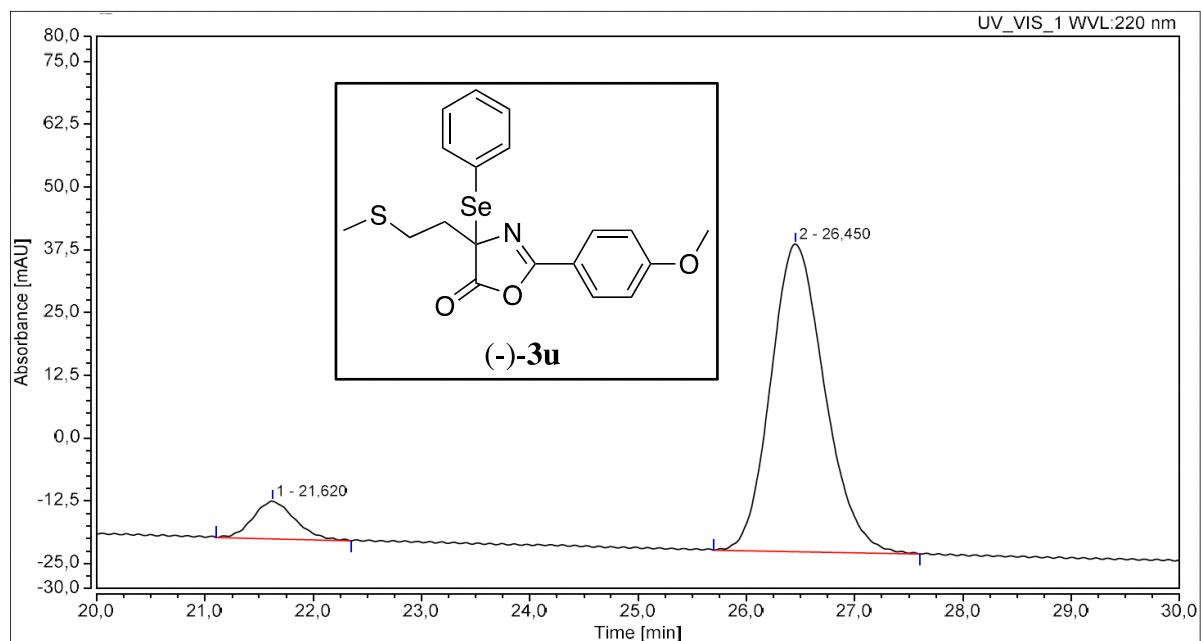

| Integration Results |           |                       |                 |               |                    |                      |                |
|---------------------|-----------|-----------------------|-----------------|---------------|--------------------|----------------------|----------------|
| No.                 | Peak Name | Retention Time<br>min | Area<br>mAU*min | Height<br>mAU | Relative Area<br>% | Relative Height<br>% | Amount<br>n.a. |
| 1                   |           | 21,620                | 3,374           | 7,523         | 8,70               | 10,93                | n.a.           |
| 2                   |           | 26,450                | 35,418          | 61,311        | 91,30              | 89,07                | n.a.           |
| Total:              |           |                       | 38,792          | 68,834        | 100,00             | 100,00               |                |

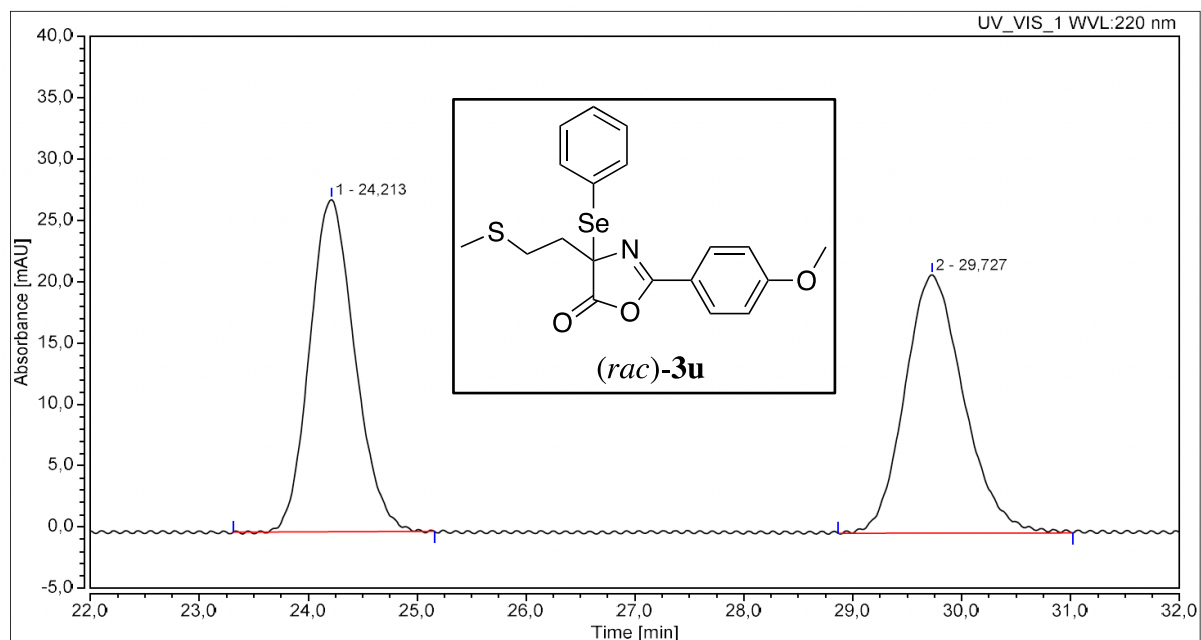

| Integration Results |           |                       |                 |               |                    |                      |                |
|---------------------|-----------|-----------------------|-----------------|---------------|--------------------|----------------------|----------------|
| No.                 | Peak Name | Retention Time<br>min | Area<br>mAU*min | Height<br>mAU | Relative Area<br>% | Relative Height<br>% | Amount<br>n.a. |
| 1                   |           | 24,213                | 13,040          | 27,096        | 49,74              | 56,27                | n.a.           |
| 2                   |           | 29,727                | 13,175          | 21,057        | 50,26              | 43,73                | n.a.           |
| Total:              |           |                       | 26,214          | 48,153        | 100,00             | 100,00               |                |

**HPLC traces of **3v**** (YMC Chiral Art Cellulose SB, *n*-hexane:*i*-PrOH = 20:1, flow rate 0.3 mL/min, 10 °C,  $\lambda$  = 270 nm)

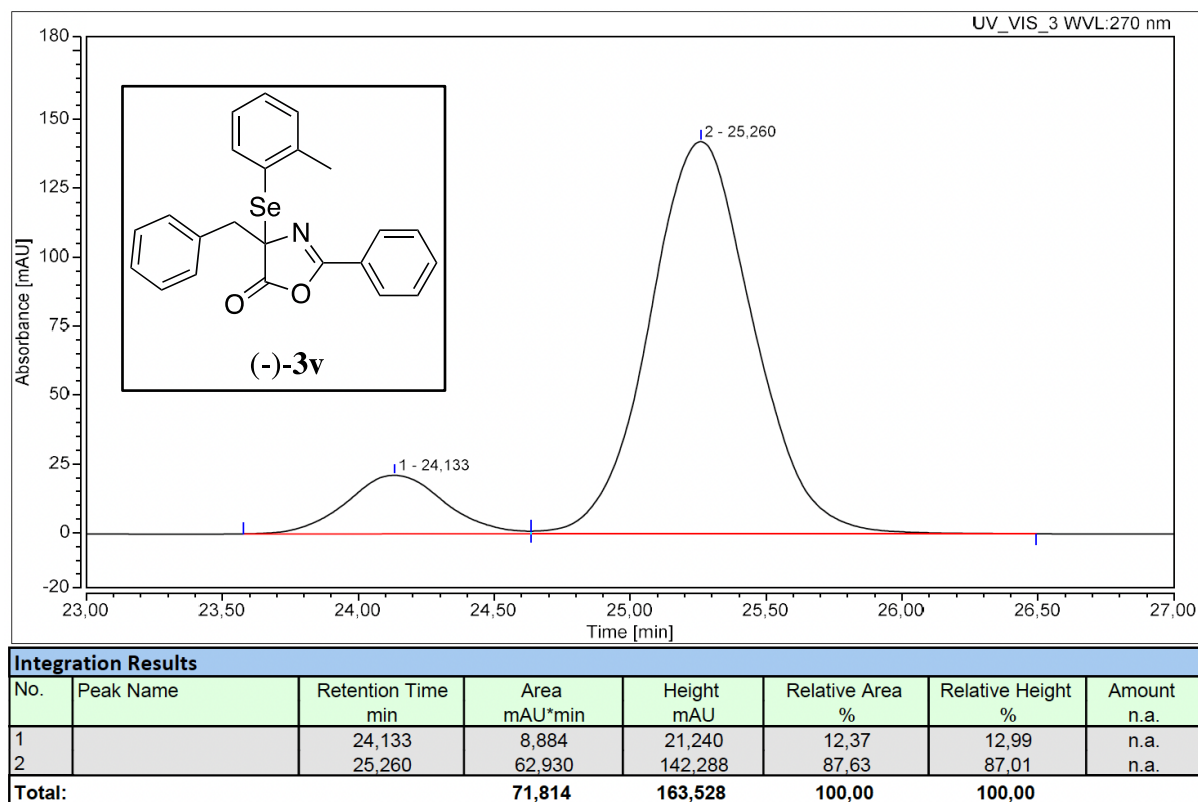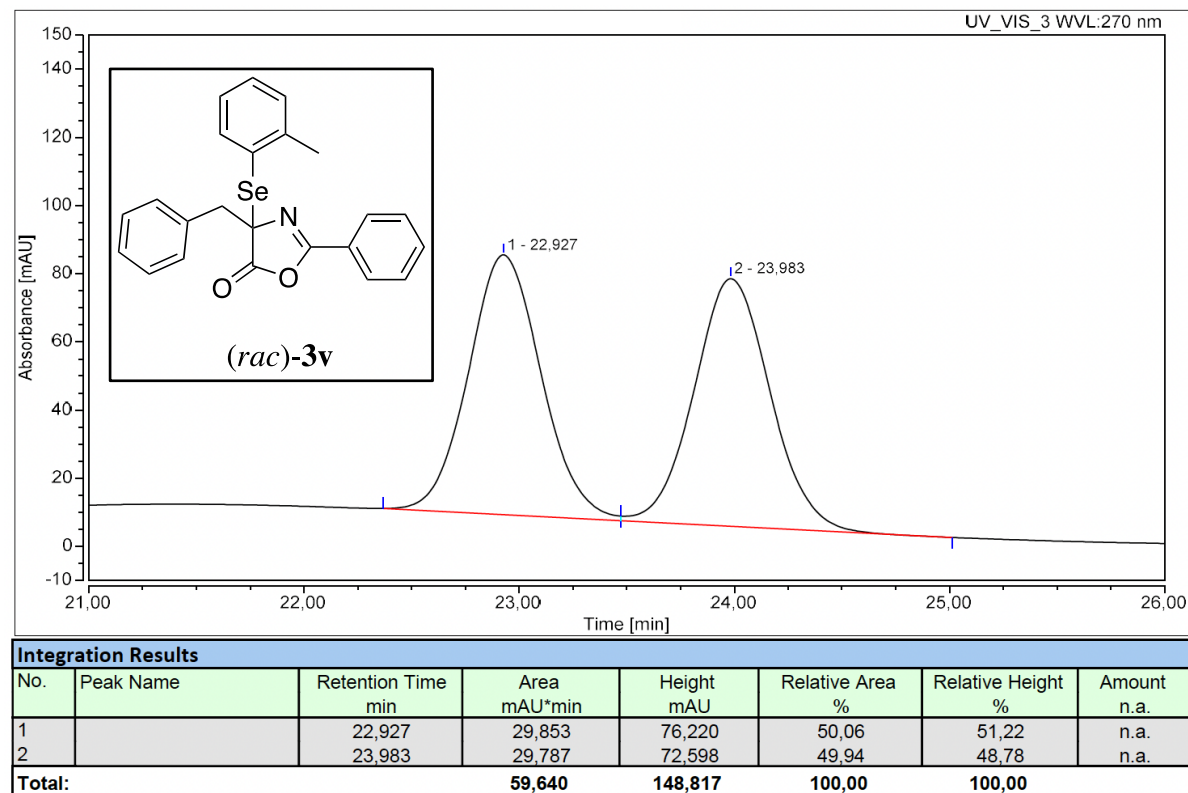

**HPLC traces of **3w**** (Chiralpak AD-H, *n*-hexane:*i*-PrOH = 20:1, flow rate 0.3 mL/min, 10 °C,  $\lambda$  = 220 nm)

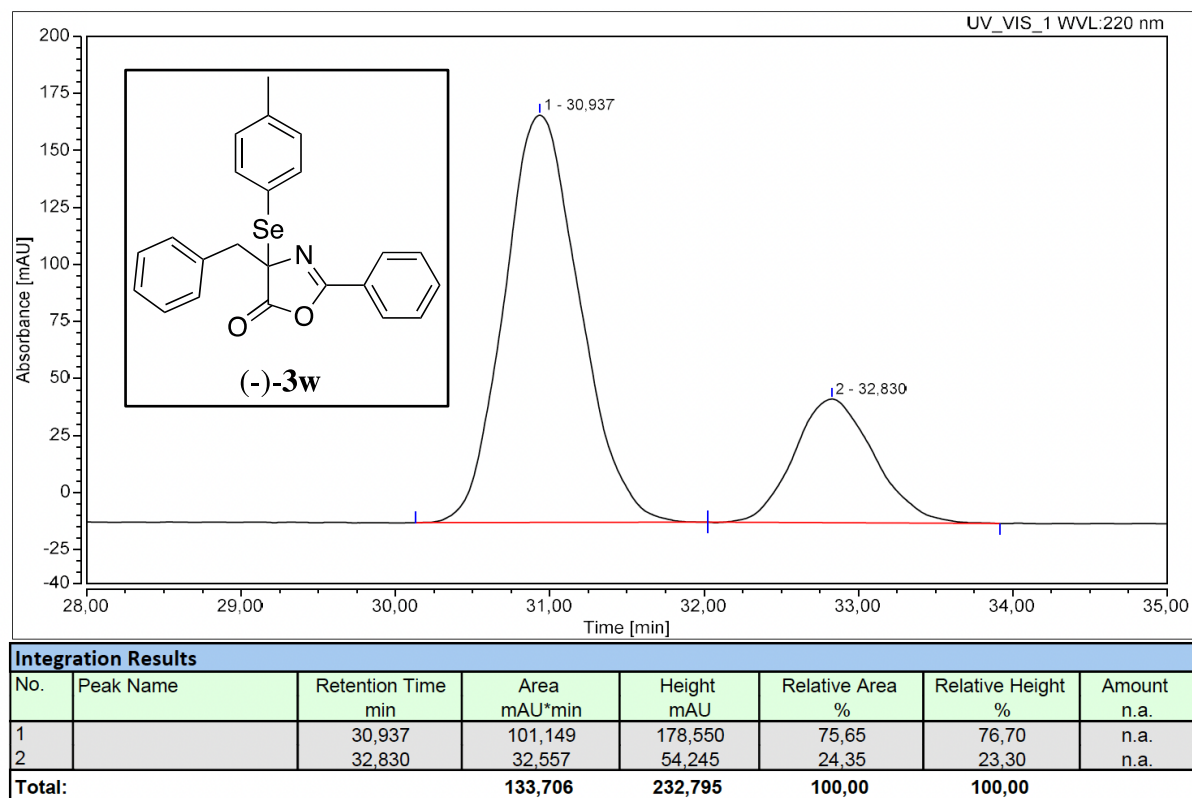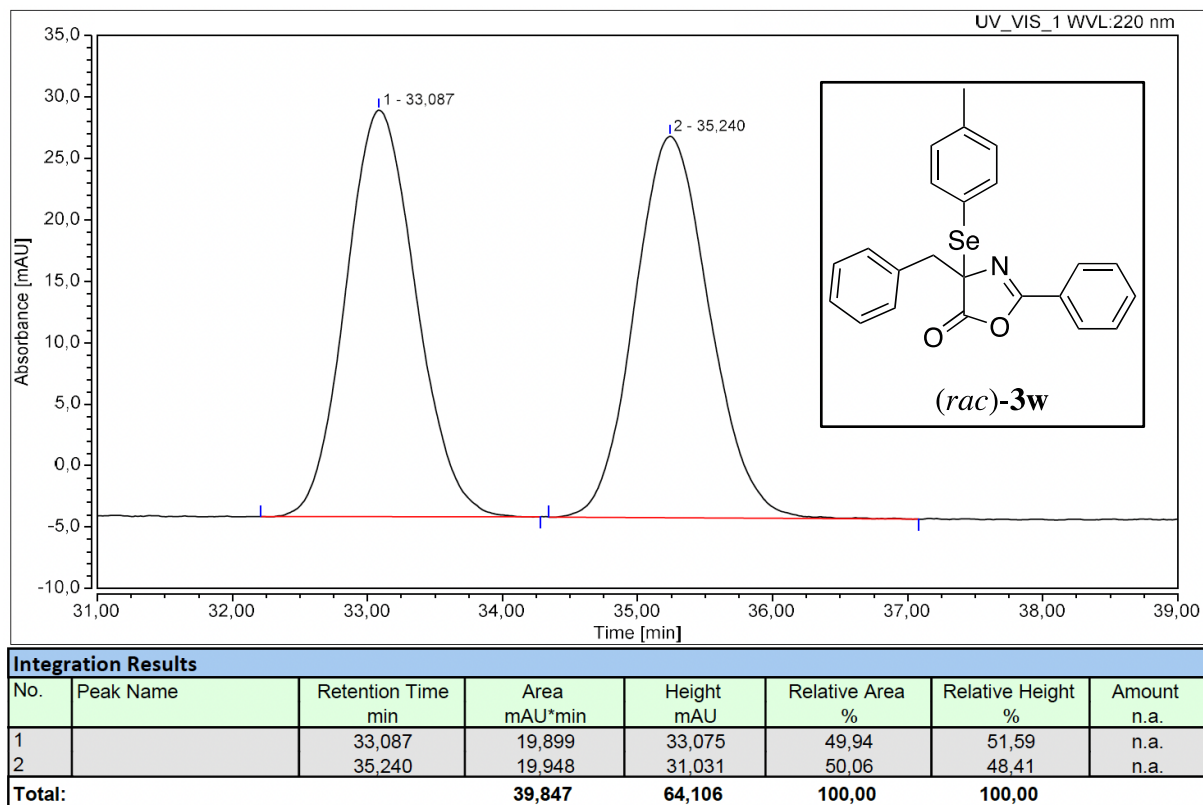

**HPLC traces of **3x**** (Chiralpak AD-H, *n*-hexane:*i*-PrOH = 20:1, flow rate 0.3 mL/min, 10 °C,  $\lambda$  = 220 nm)

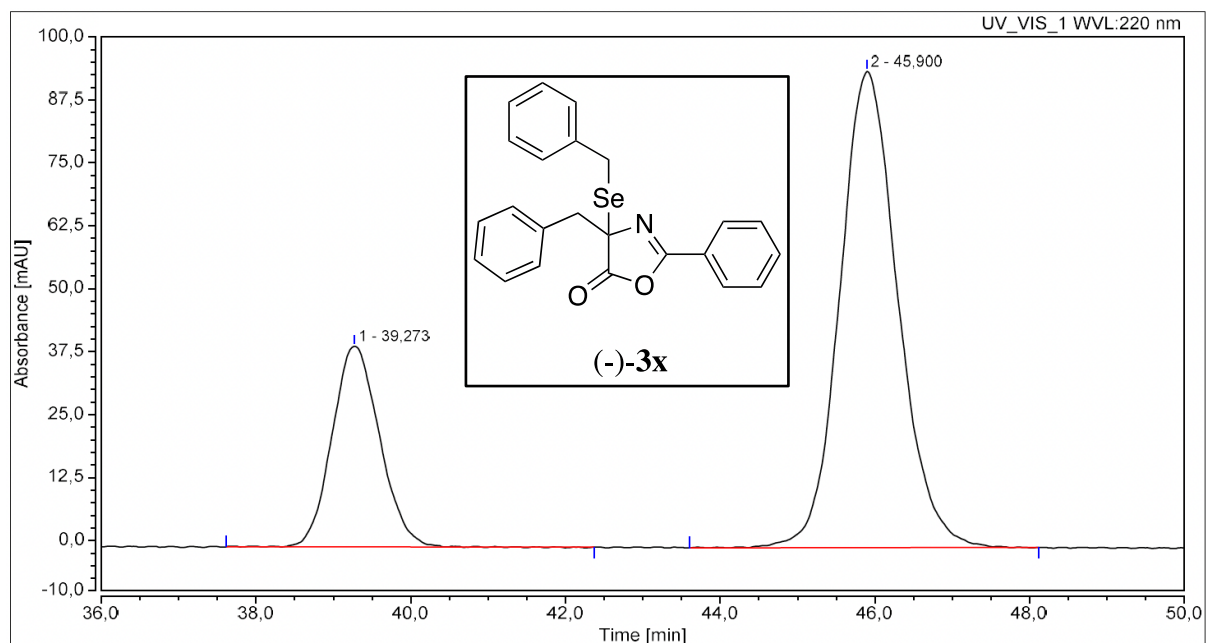

| Integration Results |           |                       |                 |               |                    |                      |                |
|---------------------|-----------|-----------------------|-----------------|---------------|--------------------|----------------------|----------------|
| No.                 | Peak Name | Retention Time<br>min | Area<br>mAU*min | Height<br>mAU | Relative Area<br>% | Relative Height<br>% | Amount<br>n.a. |
| 1                   |           | 39,273                | 28,368          | 39,823        | 25,71              | 29,63                | n.a.           |
| 2                   |           | 45,900                | 81,976          | 94,563        | 74,29              | 70,37                | n.a.           |
| Total:              |           |                       | 110,344         | 134,385       | 100,00             | 100,00               |                |

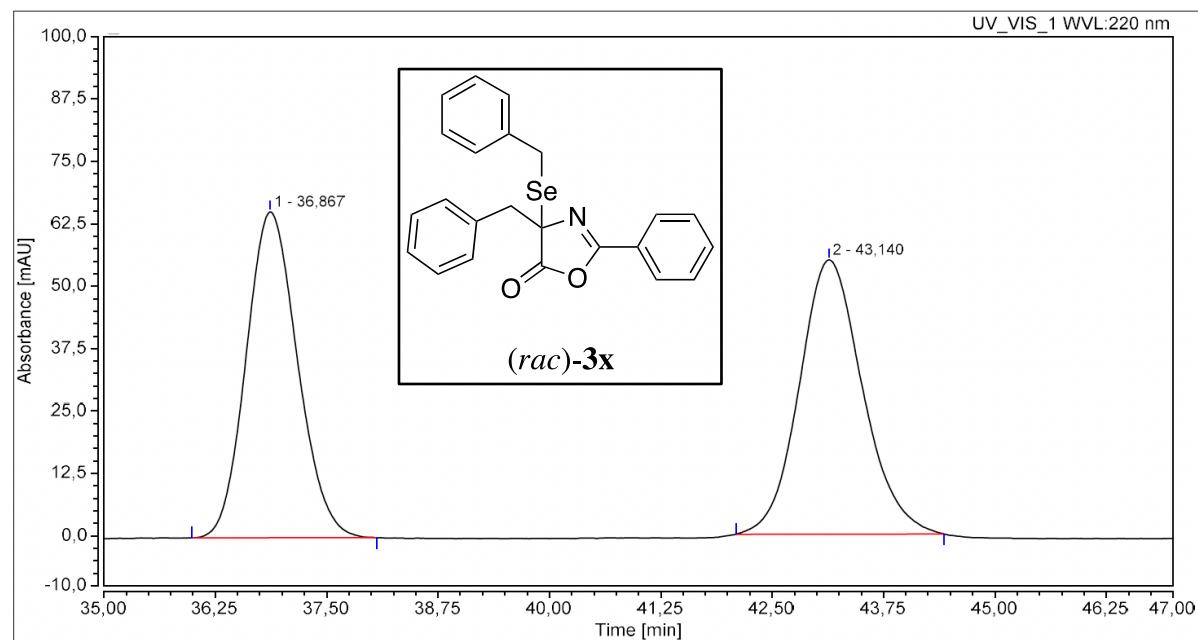

| Integration Results |           |                       |                 |               |                    |                      |                |
|---------------------|-----------|-----------------------|-----------------|---------------|--------------------|----------------------|----------------|
| No.                 | Peak Name | Retention Time<br>min | Area<br>mAU*min | Height<br>mAU | Relative Area<br>% | Relative Height<br>% | Amount<br>n.a. |
| 1                   |           | 36,867                | 43,568          | 65,307        | 49,14              | 54,31                | n.a.           |
| 2                   |           | 43,140                | 45,088          | 54,939        | 50,86              | 45,69                | n.a.           |
| Total:              |           |                       | 88,657          | 120,245       | 100,00             | 100,00               |                |

**HPLC traces of **4a**** (Chiralpak AD-H, *n*-hexane:*i*-PrOH = 20:1, flow rate 1.0 mL/min, 20 °C,  $\lambda$  = 254 nm)

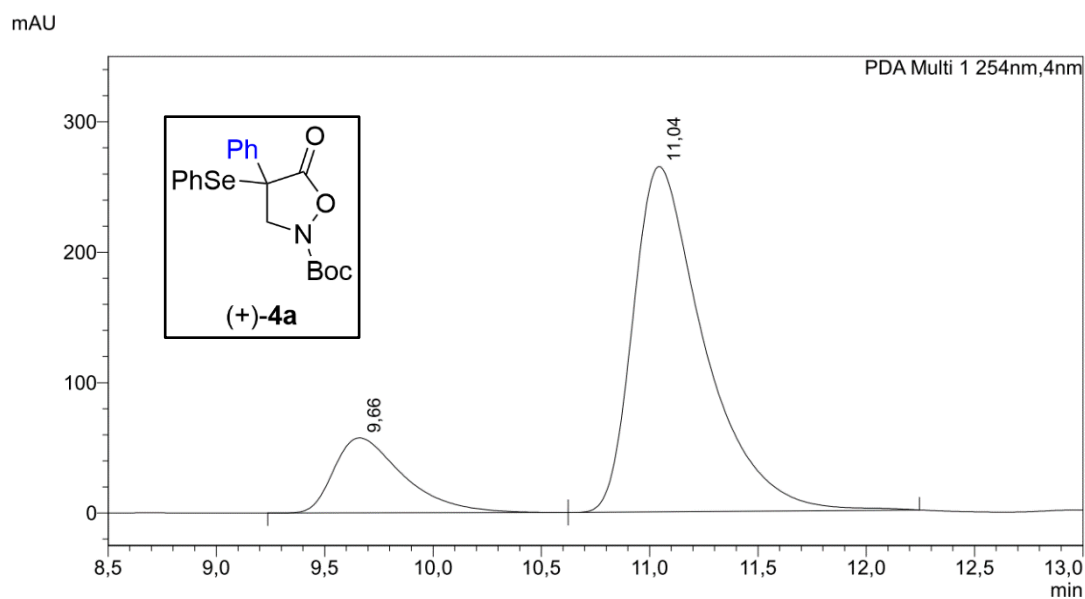

Peak Table

PDA Ch1 254nm

| Peak# | Ret. Time | Area    | Area%  |
|-------|-----------|---------|--------|
| 1     | 9,66      | 1282010 | 17,45  |
| 2     | 11,04     | 6065478 | 82,55  |
| Total |           | 7347487 | 100,00 |

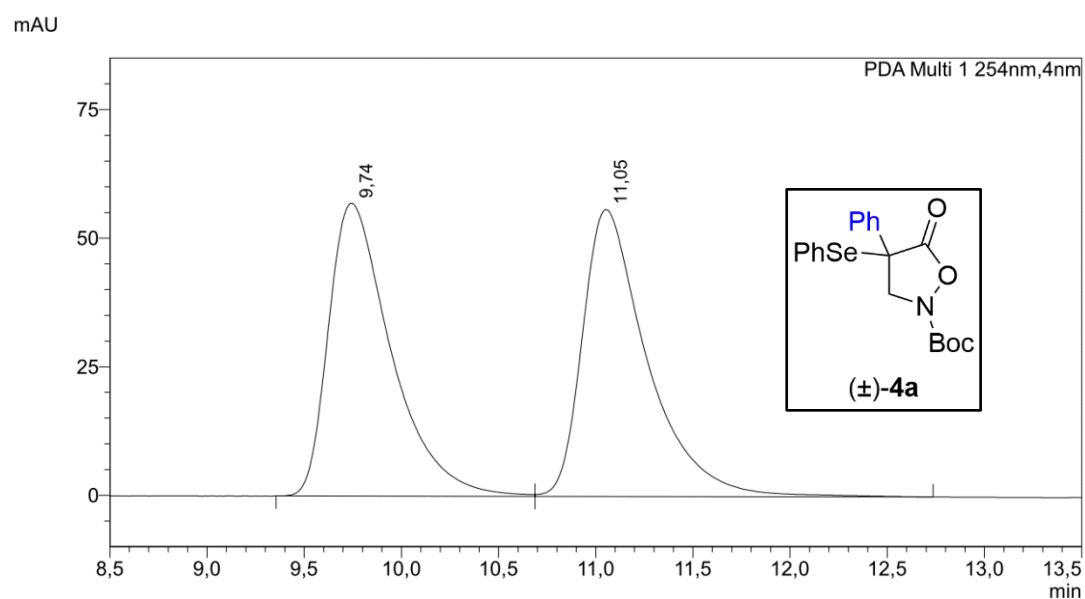

Peak Table

PDA Ch1 254nm

| Peak# | Ret. Time | Area    | Area%  |
|-------|-----------|---------|--------|
| 1     | 9,74      | 1277340 | 49,66  |
| 2     | 11,05     | 1294957 | 50,34  |
| Total |           | 2572297 | 100,00 |

**HPLC traces of **4b**** (Chiralpak AD-H, *n*-hexane:*i*-PrOH = 20:1, flow rate 1.0 mL/min, 20 °C,  $\lambda$  = 254 nm)

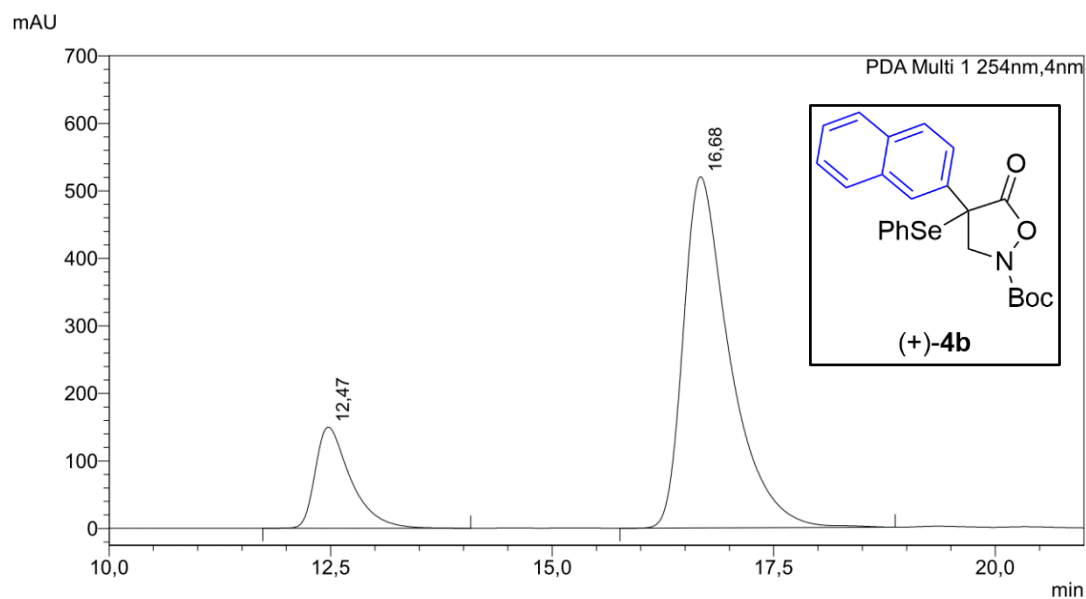

Peak Table

| PDA Ch1 254nm |           |          |        |
|---------------|-----------|----------|--------|
| Peak#         | Ret. Time | Area     | Area%  |
| 1             | 12,47     | 4169553  | 17,97  |
| 2             | 16,68     | 19033478 | 82,03  |
| Total         |           | 23203031 | 100,00 |

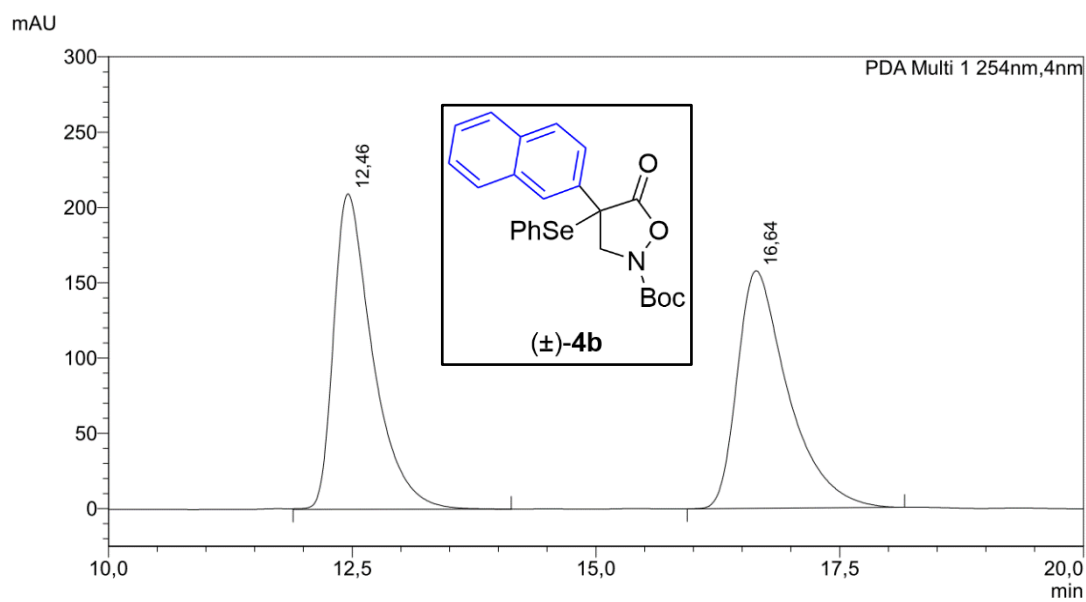

Peak Table

| PDA Ch1 254nm |           |          |        |
|---------------|-----------|----------|--------|
| Peak#         | Ret. Time | Area     | Area%  |
| 1             | 12,46     | 5822250  | 50,46  |
| 2             | 16,64     | 5715966  | 49,54  |
| Total         |           | 11538216 | 100,00 |

**HPLC traces of **4c**** (Chiralpak AD-H, *n*-hexane:*i*-PrOH = 20:1, flow rate 1.0 mL/min, 20 °C,  $\lambda$  = 254 nm)

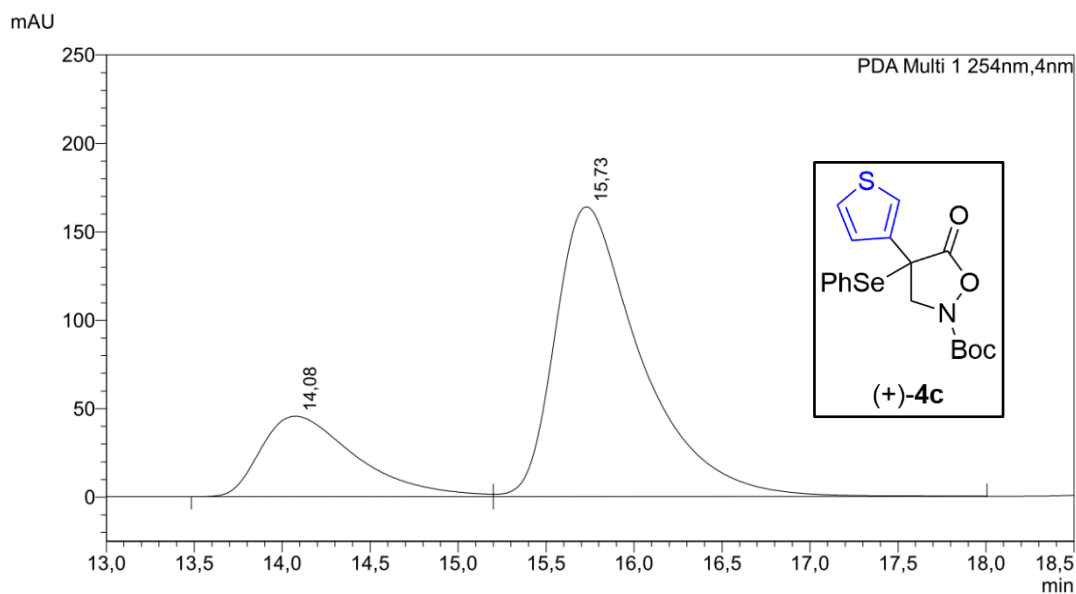

Peak Table

PDA Ch1 254nm

| Peak# | Ret. Time | Area    | Area%  |
|-------|-----------|---------|--------|
| 1     | 14,08     | 1708423 | 23,54  |
| 2     | 15,73     | 5549356 | 76,46  |
| Total |           | 7257779 | 100,00 |

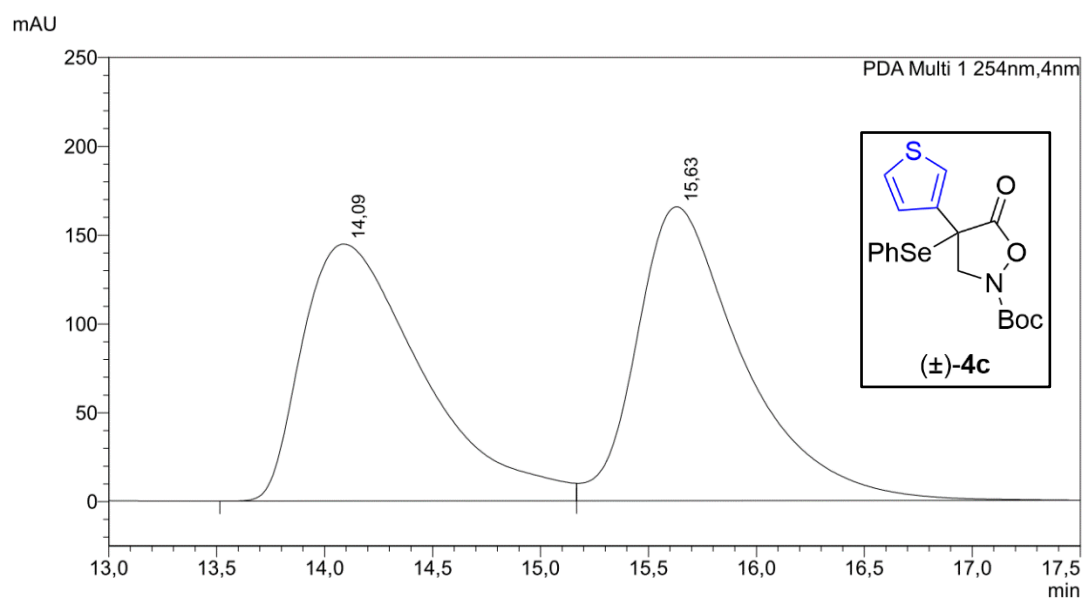

Peak Table

PDA Ch1 254nm

| Peak# | Ret. Time | Area     | Area%  |
|-------|-----------|----------|--------|
| 1     | 14,09     | 5615054  | 49,71  |
| 2     | 15,63     | 5680643  | 50,29  |
| Total |           | 11295697 | 100,00 |

**HPLC traces of **4d**** (Chiralpak AD-H, *n*-hexane:*i*-PrOH = 20:1, flow rate 1.0 mL/min, 20 °C,  $\lambda$  = 254 nm)

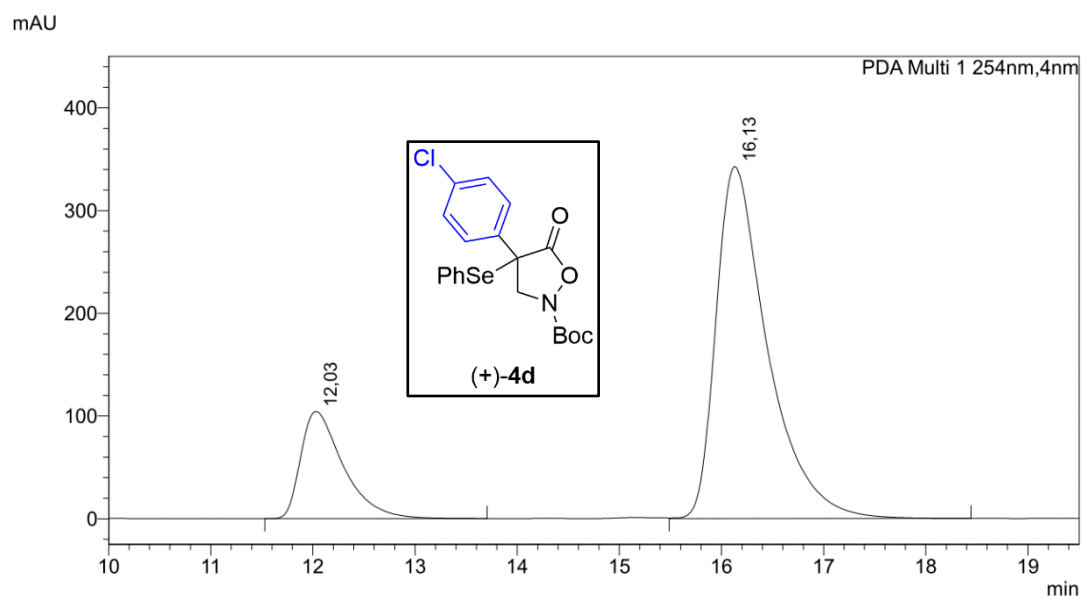

Peak Table

PDA Ch1 254nm

| Peak# | Ret. Time | Area     | Area%  |
|-------|-----------|----------|--------|
| 1     | 12,03     | 3020050  | 20,07  |
| 2     | 16,13     | 12029062 | 79,93  |
| Total |           | 15049112 | 100,00 |

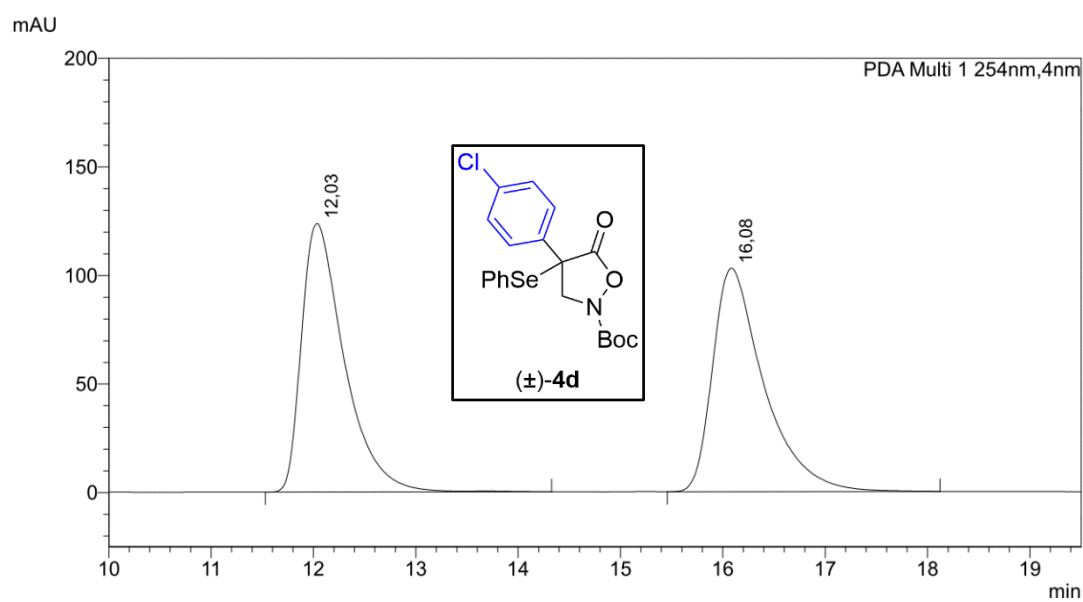

Peak Table

PDA Ch1 254nm

| Peak# | Ret. Time | Area    | Area%  |
|-------|-----------|---------|--------|
| 1     | 12,03     | 3589177 | 50,06  |
| 2     | 16,08     | 3580893 | 49,94  |
| Total |           | 7170070 | 100,00 |

**HPLC traces of **4e**** (Chiralpak AD-H, *n*-hexane:*i*-PrOH = 20:1, flow rate 1.0 mL/min, 20 °C,  $\lambda$  = 254 nm)

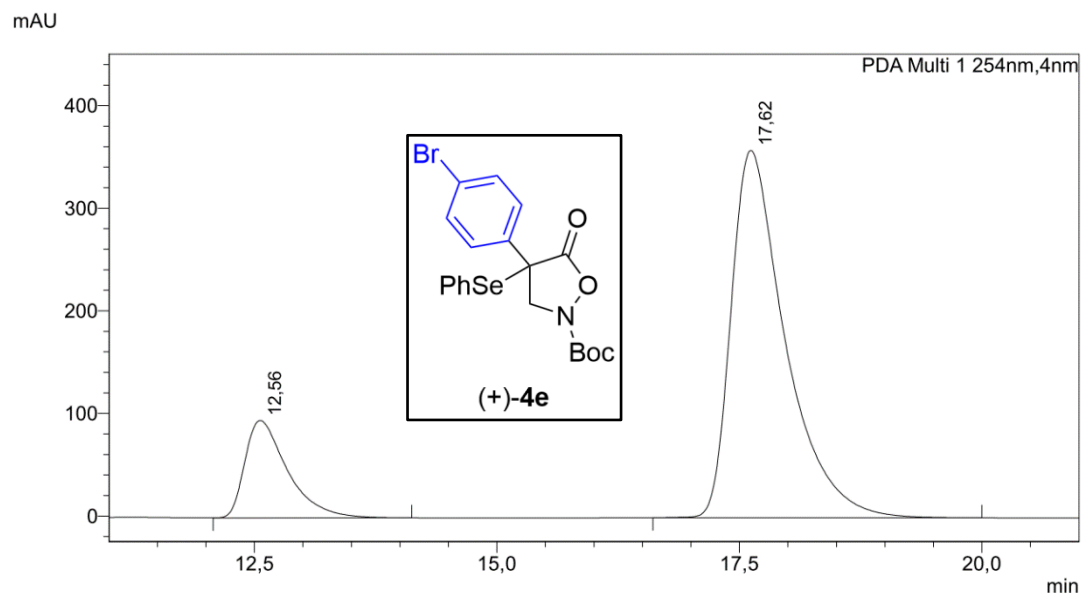

Peak Table

PDA Ch1 254nm

| Peak# | Ret. Time | Area     | Area%  |
|-------|-----------|----------|--------|
| 1     | 12,56     | 2901606  | 17,29  |
| 2     | 17,62     | 13884221 | 82,71  |
| Total |           | 16785827 | 100,00 |

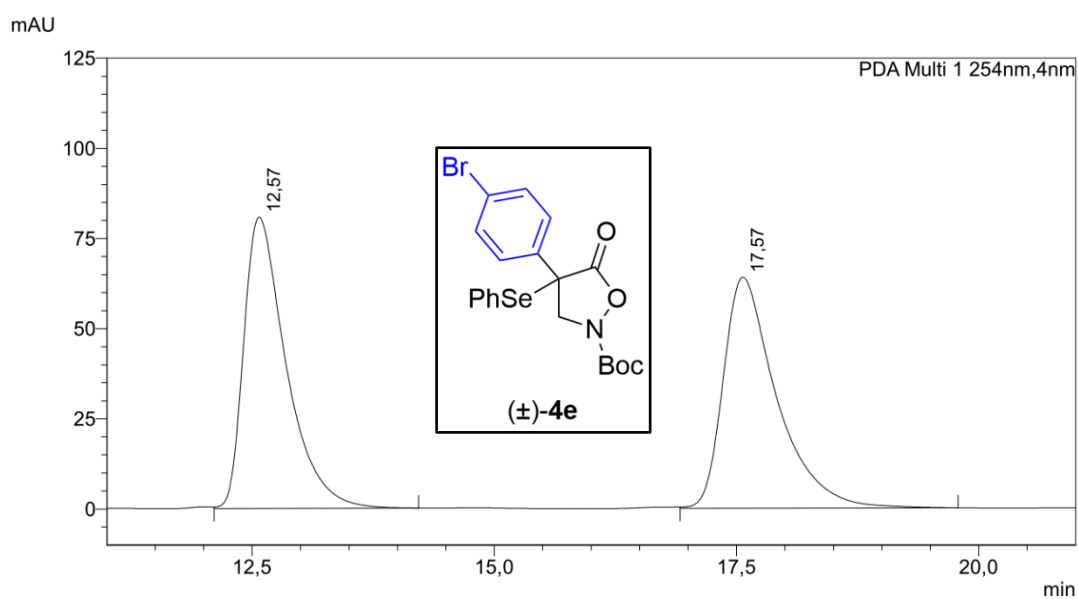

Peak Table

PDA Ch1 254nm

| Peak# | Ret. Time | Area    | Area%  |
|-------|-----------|---------|--------|
| 1     | 12,57     | 2453924 | 49,97  |
| 2     | 17,57     | 2457074 | 50,03  |
| Total |           | 4910998 | 100,00 |

**HPLC traces of **4f**** (Chiralpak AD-H, *n*-hexane:*i*-PrOH = 20:1, flow rate 1.0 mL/min, 20 °C,  $\lambda$  = 254 nm)

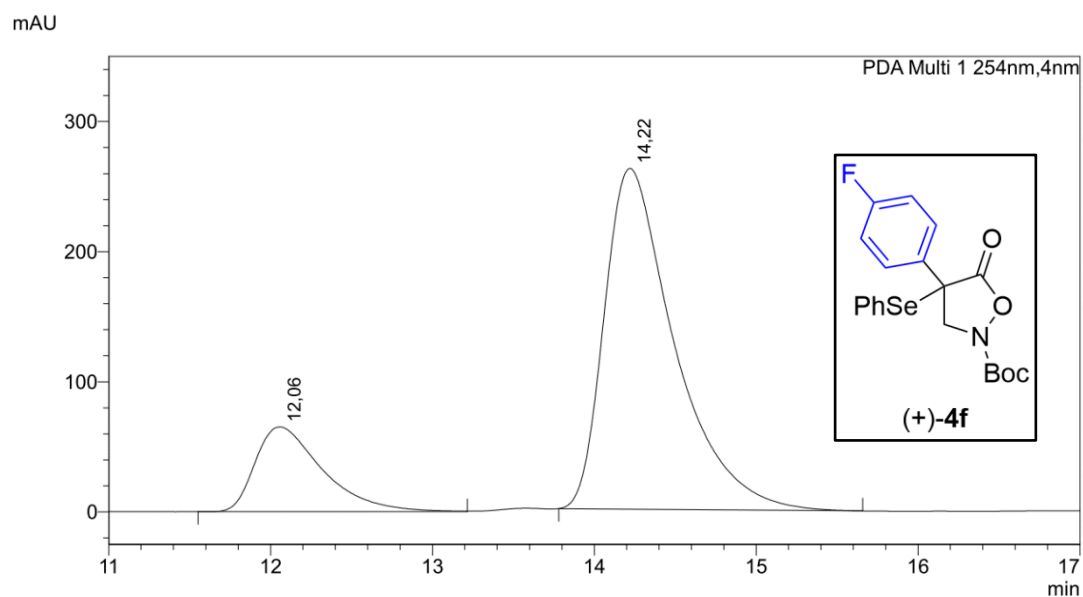

Peak Table

PDA Ch1 254nm

| Peak# | Ret. Time | Area    | Area%  |
|-------|-----------|---------|--------|
| 1     | 12,06     | 1879654 | 19,26  |
| 2     | 14,22     | 7878156 | 80,74  |
| Total |           | 9757810 | 100,00 |

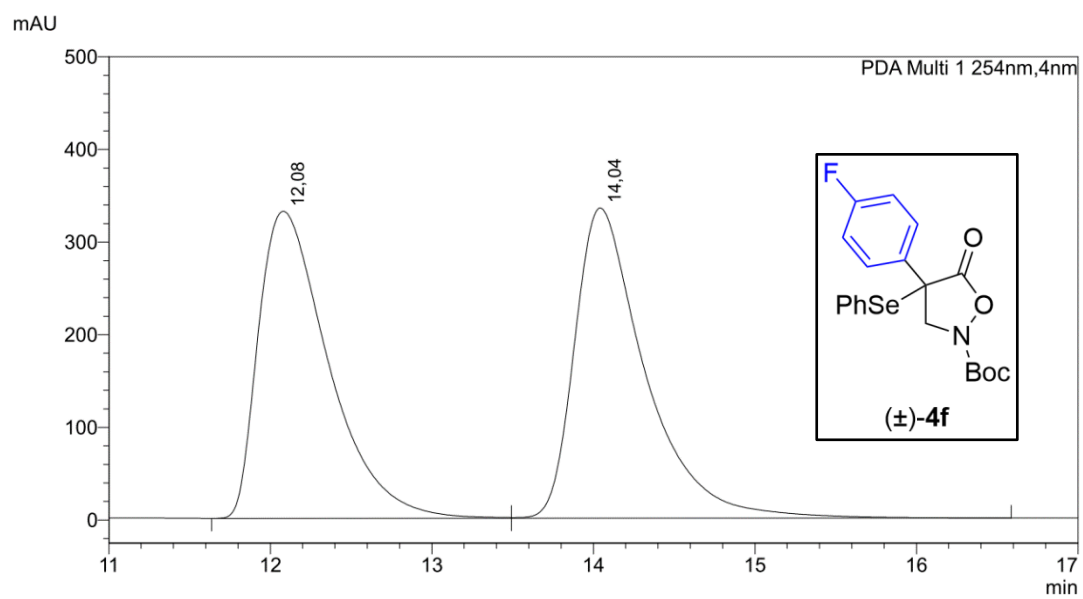

Peak Table

PDA Ch1 254nm

| Peak# | Ret. Time | Area     | Area%  |
|-------|-----------|----------|--------|
| 1     | 12,08     | 10007146 | 49,53  |
| 2     | 14,04     | 10198474 | 50,47  |
| Total |           | 20205620 | 100,00 |

**HPLC traces of **4g**** (Chiralpak AD-H, *n*-hexane:*i*-PrOH = 20:1, flow rate 1.0 mL/min, 20 °C,  $\lambda$  = 254 nm)

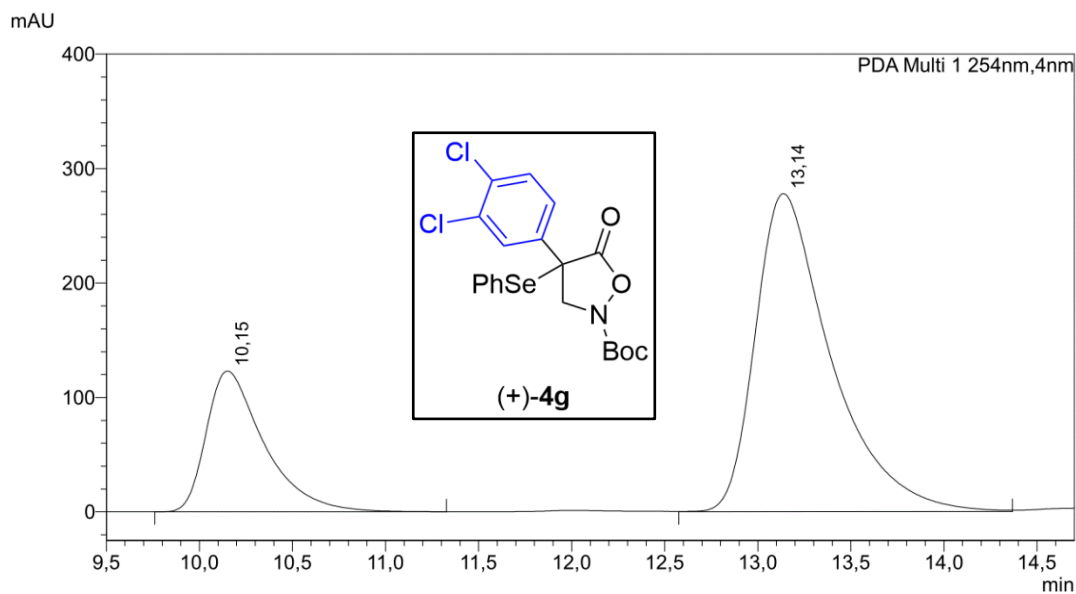

Peak Table

PDA Ch1 254nm

| Peak# | Ret. Time | Area     | Area%  |
|-------|-----------|----------|--------|
| 1     | 10,15     | 2654198  | 25,22  |
| 2     | 13,14     | 7869025  | 74,78  |
| Total |           | 10523223 | 100,00 |

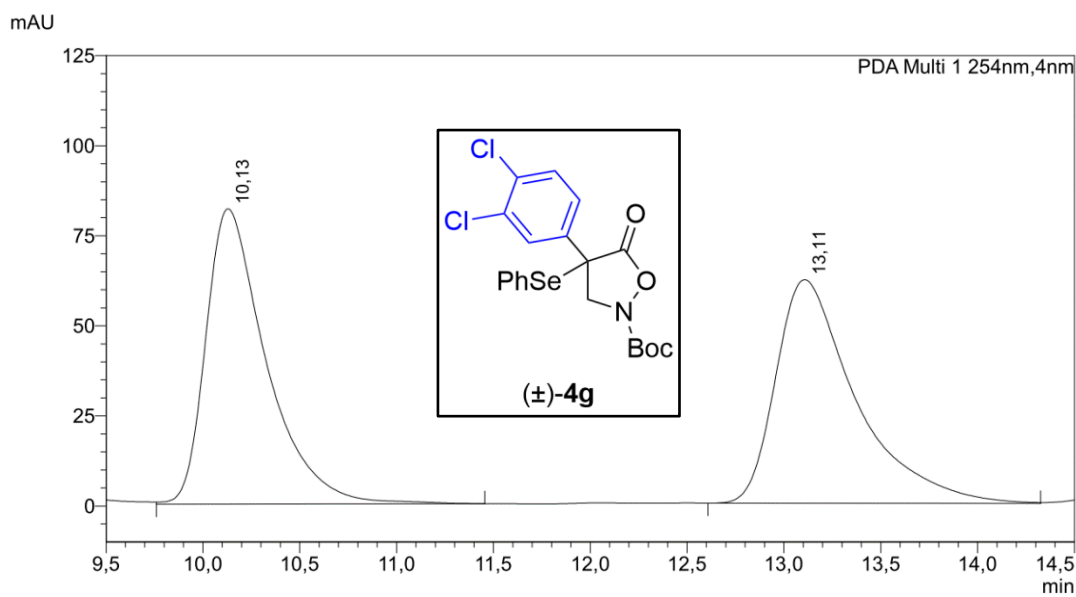

Peak Table

PDA Ch1 254nm

| Peak# | Ret. Time | Area    | Area%  |
|-------|-----------|---------|--------|
| 1     | 10,13     | 1775586 | 49,89  |
| 2     | 13,11     | 1783726 | 50,11  |
| Total |           | 3559312 | 100,00 |

**HPLC traces of **4i**** (Chiralpak AD-H, *n*-hexane:*i*-PrOH = 20:1, flow rate 1.0 mL/min, 20 °C,  $\lambda$  = 254 nm)

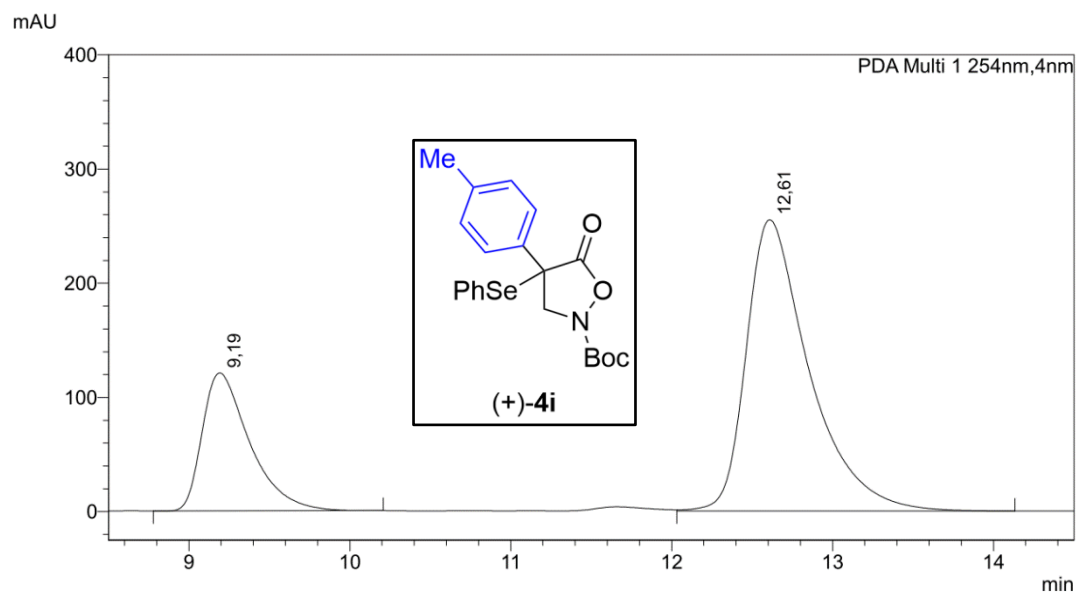

Peak Table

PDA Ch1 254nm

| Peak# | Ret. Time | Area    | Area%  |
|-------|-----------|---------|--------|
| 1     | 9,19      | 2471161 | 26,27  |
| 2     | 12,61     | 6934762 | 73,73  |
| Total |           | 9405924 | 100,00 |

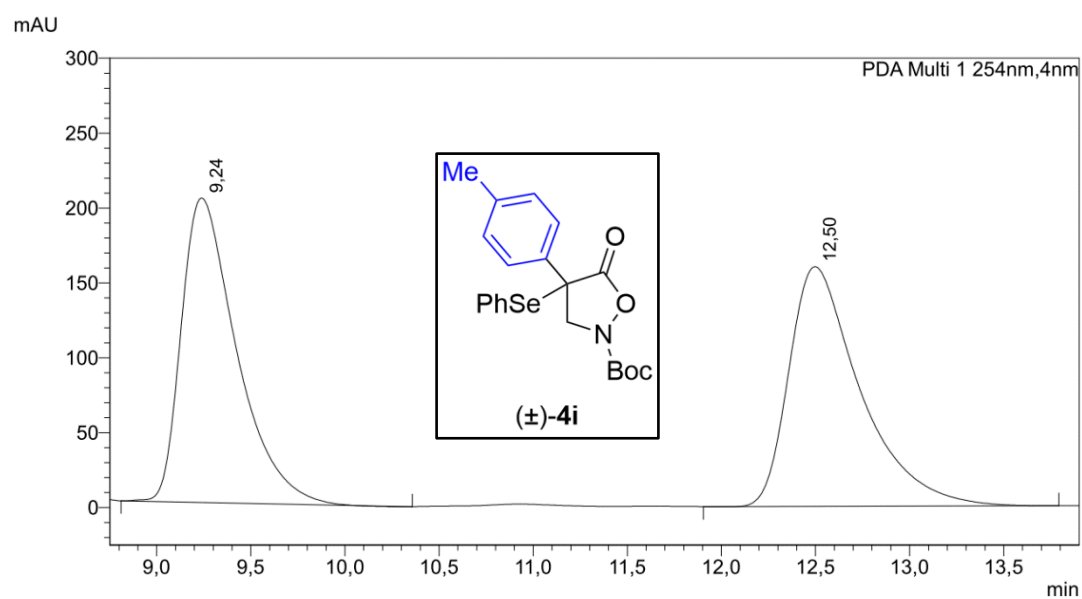

Peak Table

PDA Ch1 254nm

| Peak# | Ret. Time | Area    | Area%  |
|-------|-----------|---------|--------|
| 1     | 9,24      | 4142184 | 49,61  |
| 2     | 12,50     | 4207357 | 50,39  |
| Total |           | 8349541 | 100,00 |

**HPLC traces of **4j**** (Chiralpak AD-H, *n*-hexane:*i*-PrOH = 20:1, flow rate 1.0 mL/min, 10 °C,  $\lambda$  = 240 nm)

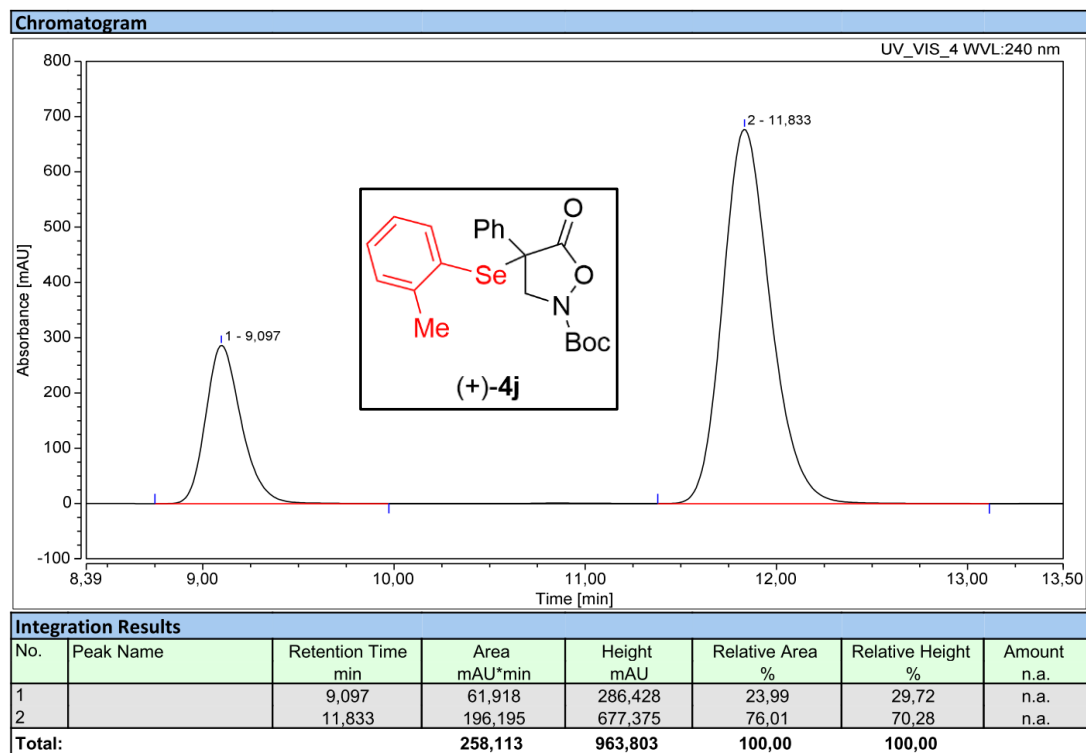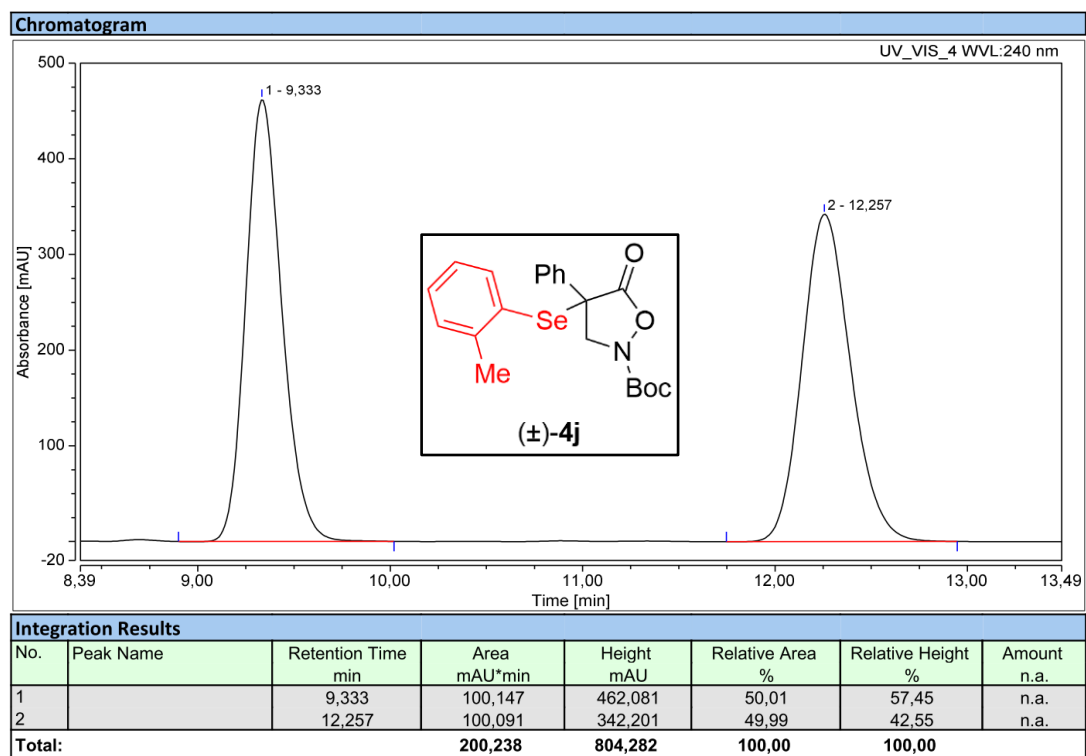

**HPLC traces of **4k**** (Chiralpak AD-H, *n*-hexane:*i*-PrOH = 20:1, flow rate 1.0 mL/min, 10 °C,  $\lambda$  = 240 nm)

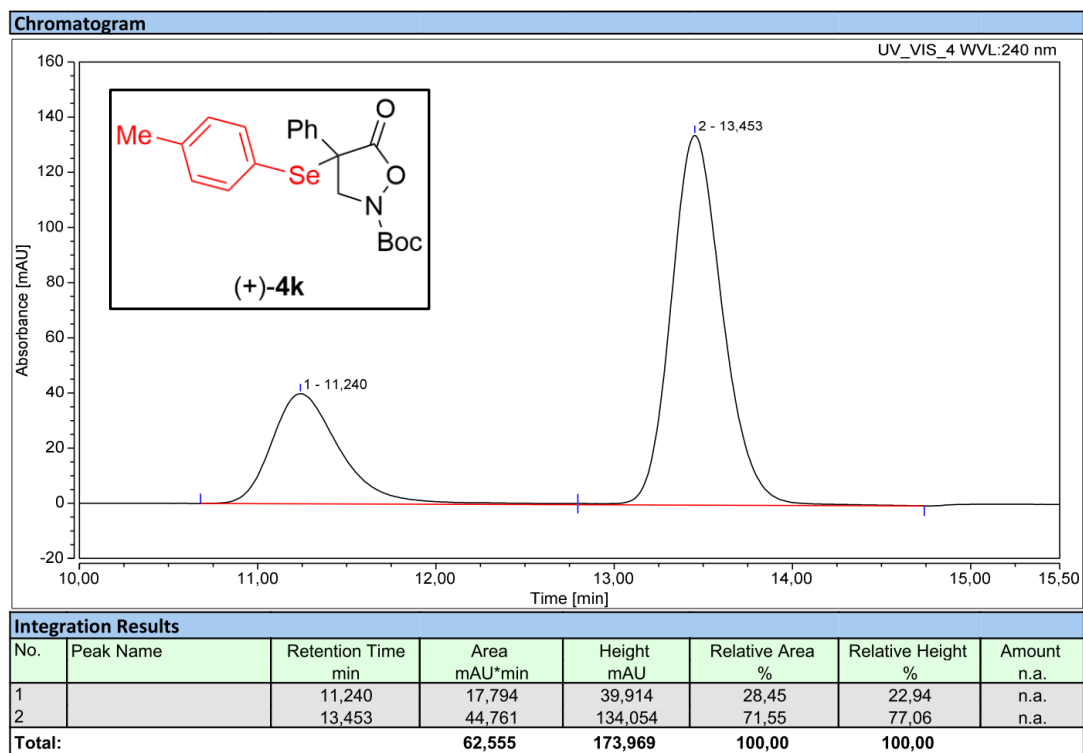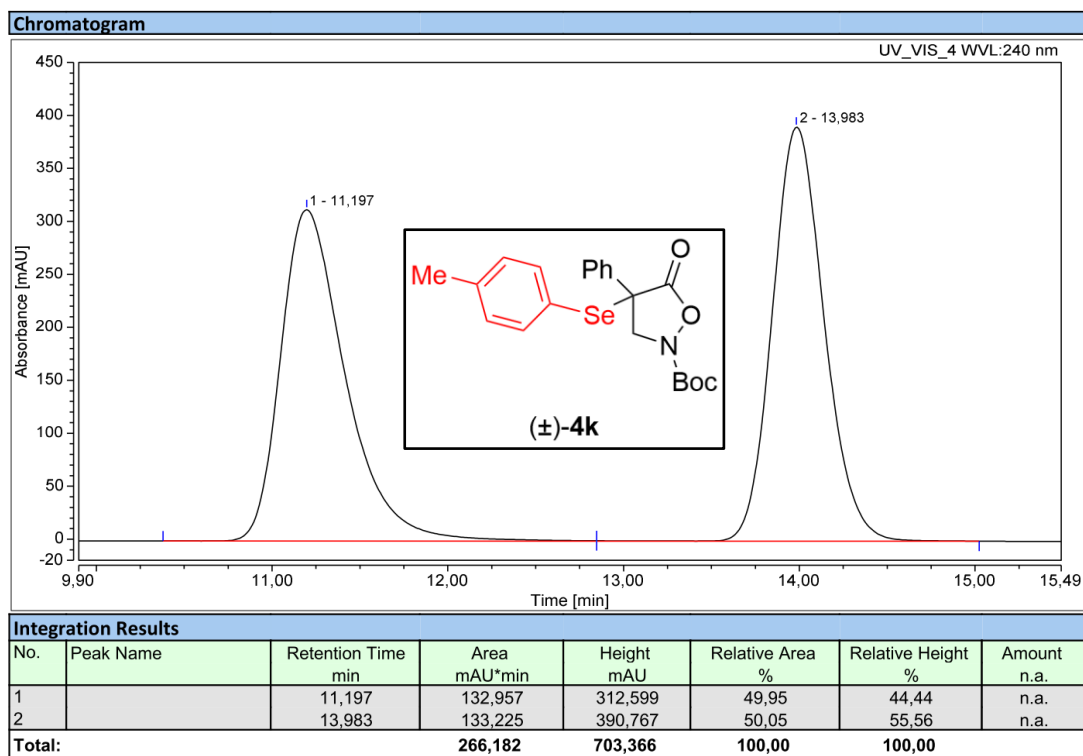

**HPLC traces of **4I**** (Chiralpak OD-H, *n*-hexane:*i*-PrOH = 20:1, flow rate 1.0 mL/min, 10 °C,  $\lambda$  = 220 nm)

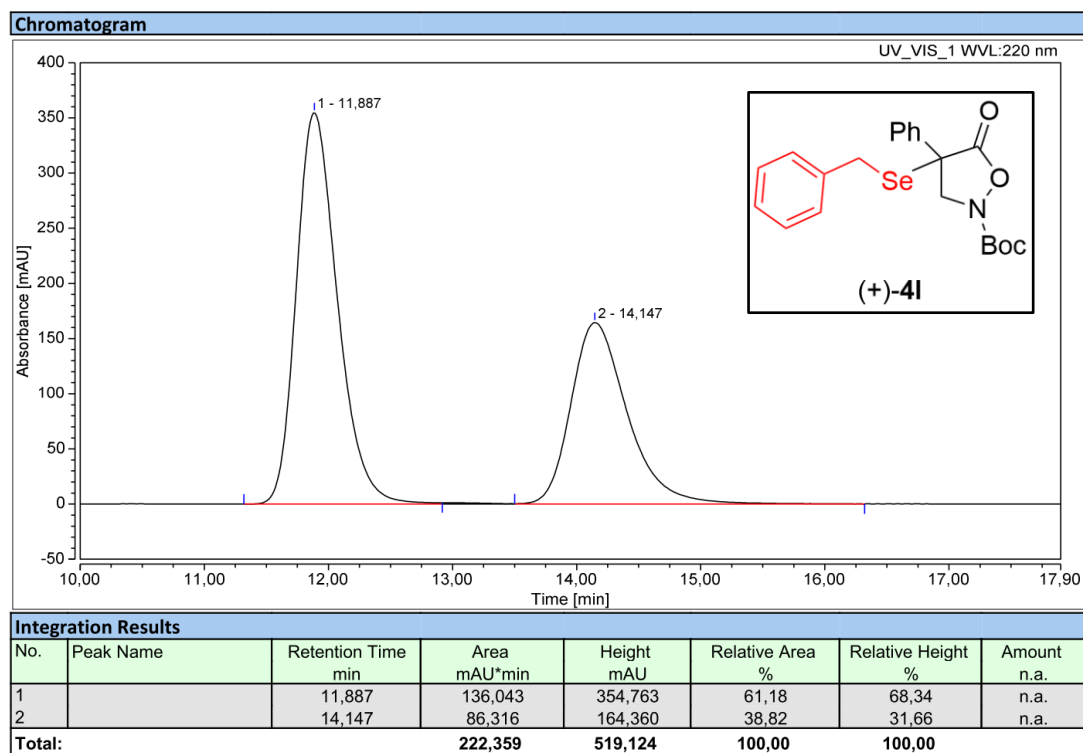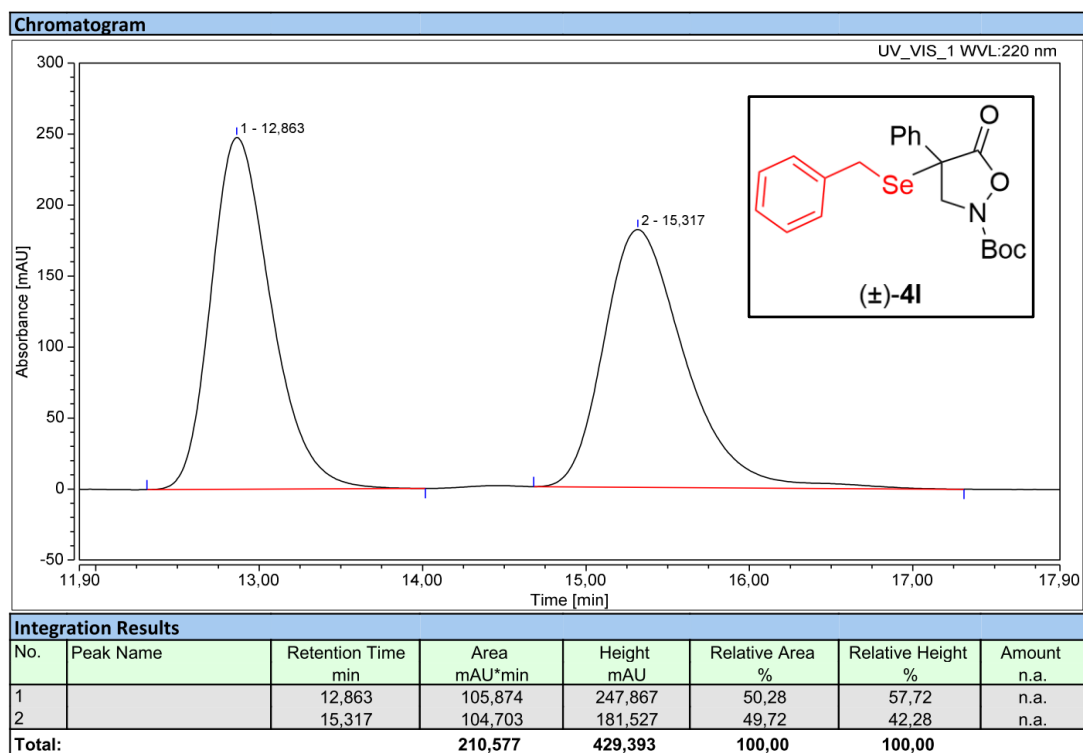

**HPLC traces of **6**** (Chiralpak AD-H, *n*-hexane:*i*-PrOH = 20:1, flow rate 0.9 mL/min, 10 °C,  $\lambda$  = 220 nm)

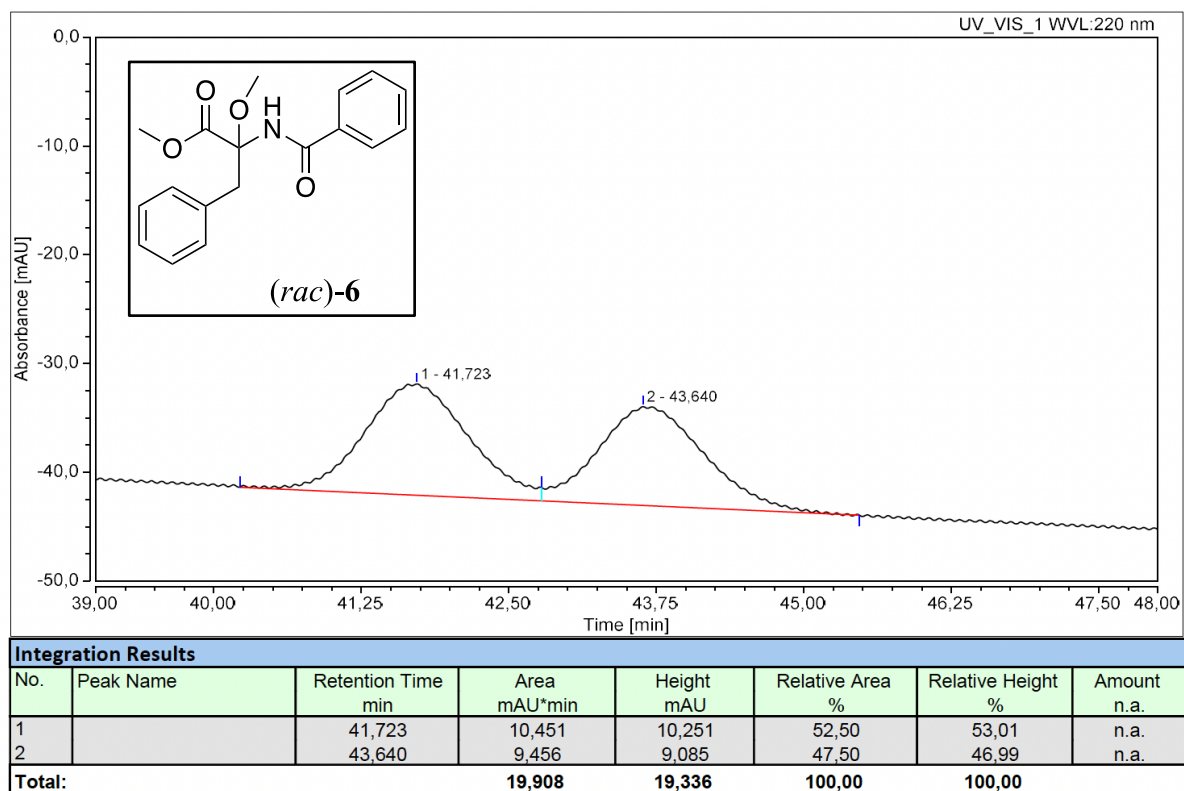

**HPLC traces of **9a**** (Chiralpak OD-H, *n*-hexane:*i*-PrOH = 2:1, flow rate 0.5 mL/min, 20 °C,  $\lambda$  = 254 nm)

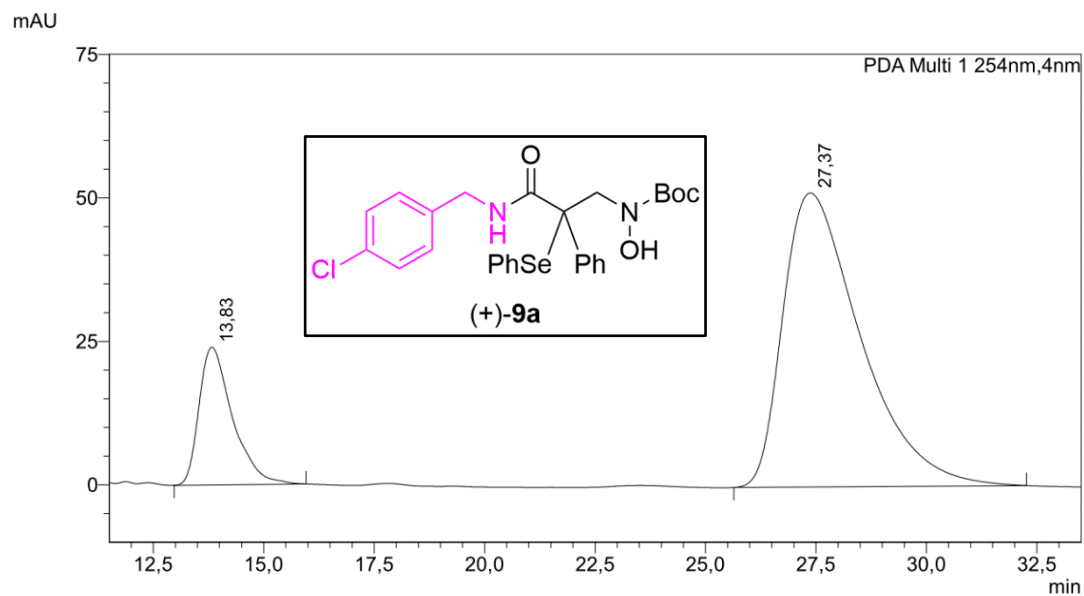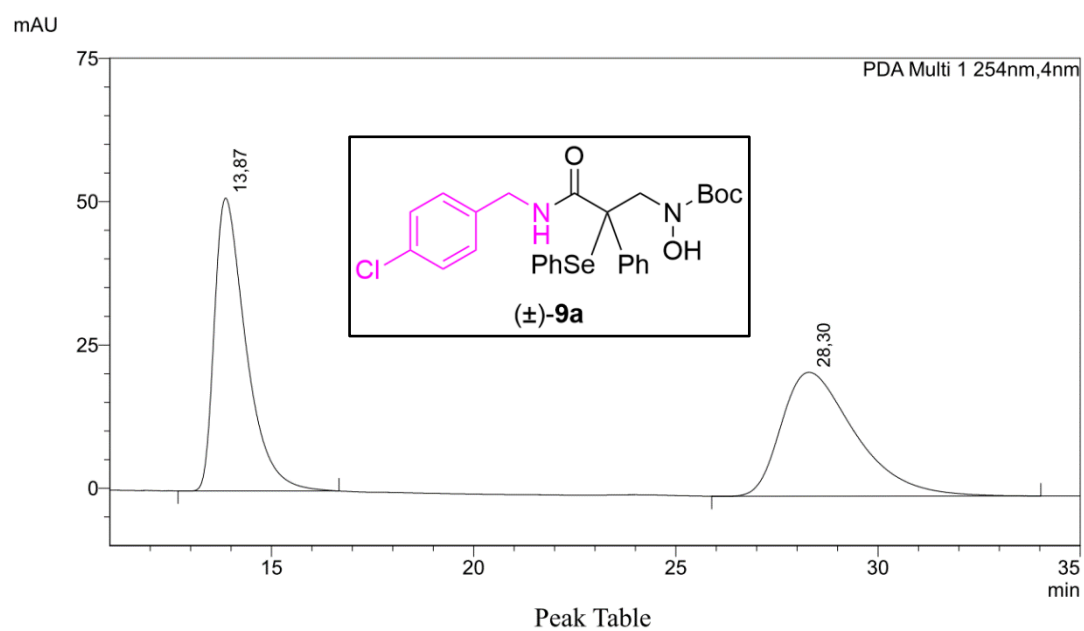

**HPLC traces of **9b**** (Chiralpak OD-H, *n*-hexane:*i*-PrOH = 2:1, flow rate 0.5 mL/min, 20 °C,  $\lambda$  = 254 nm)

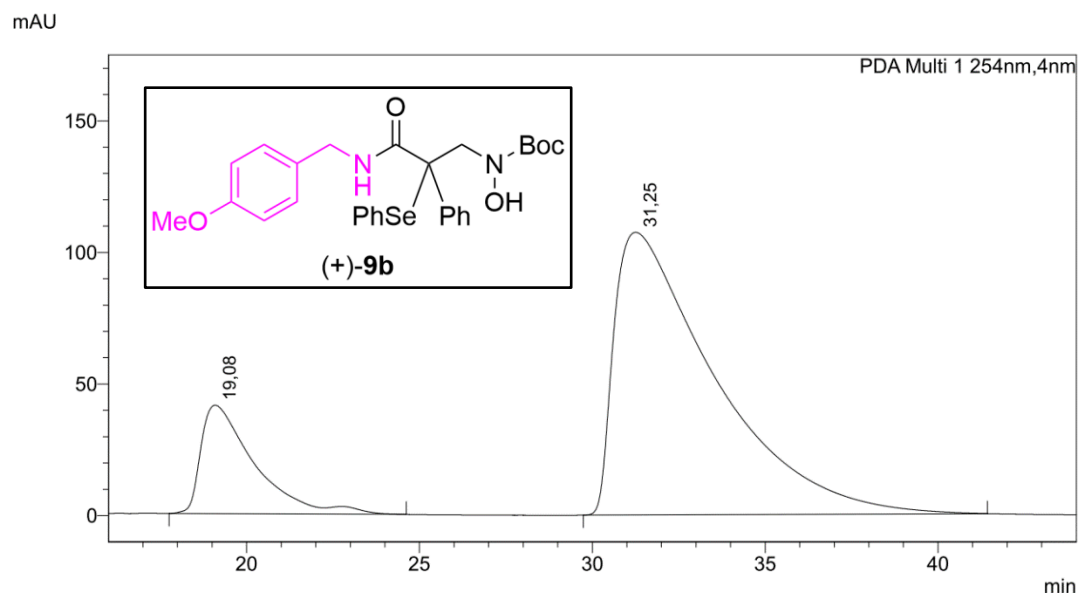

Peak Table

| Peak# | Ret. Time | Area     | Area%  |
|-------|-----------|----------|--------|
| 1     | 19,08     | 4458318  | 17,04  |
| 2     | 31,25     | 21703836 | 82,96  |
| Total |           | 26162154 | 100,00 |

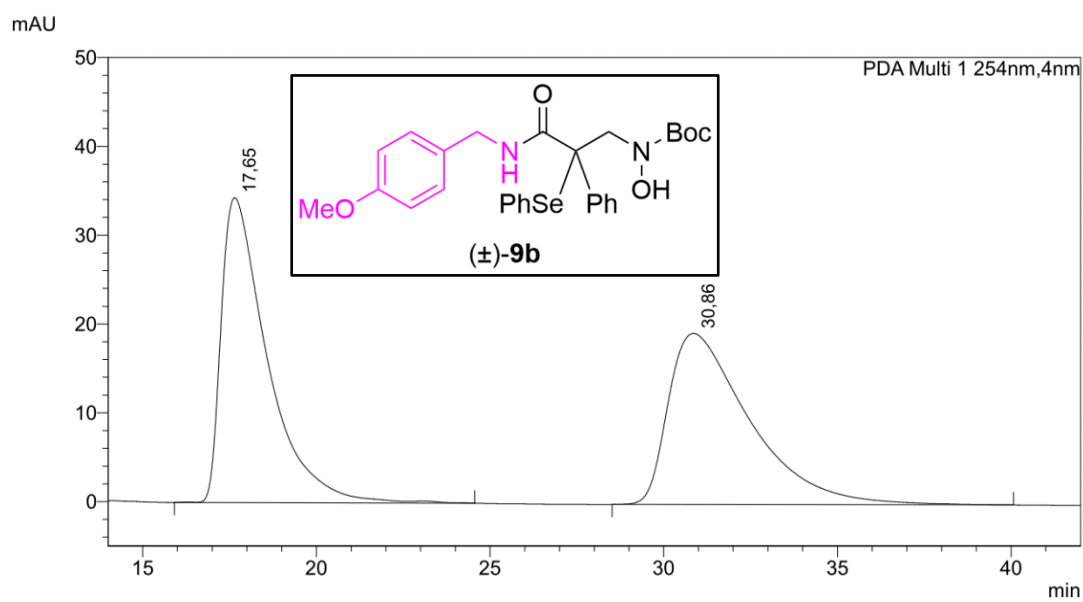

Peak Table

| Peak# | Ret. Time | Area    | Area%  |
|-------|-----------|---------|--------|
| 1     | 17,65     | 3164909 | 50,19  |
| 2     | 30,86     | 3140800 | 49,81  |
| Total |           | 6305709 | 100,00 |

**HPLC traces of **10**** (YMC Chiral ART Cellulose-SB, *n*-hexane:*i*-PrOH = 4:1, flow rate 0.5 mL/min, 20 °C,  $\lambda$  = 254 nm)

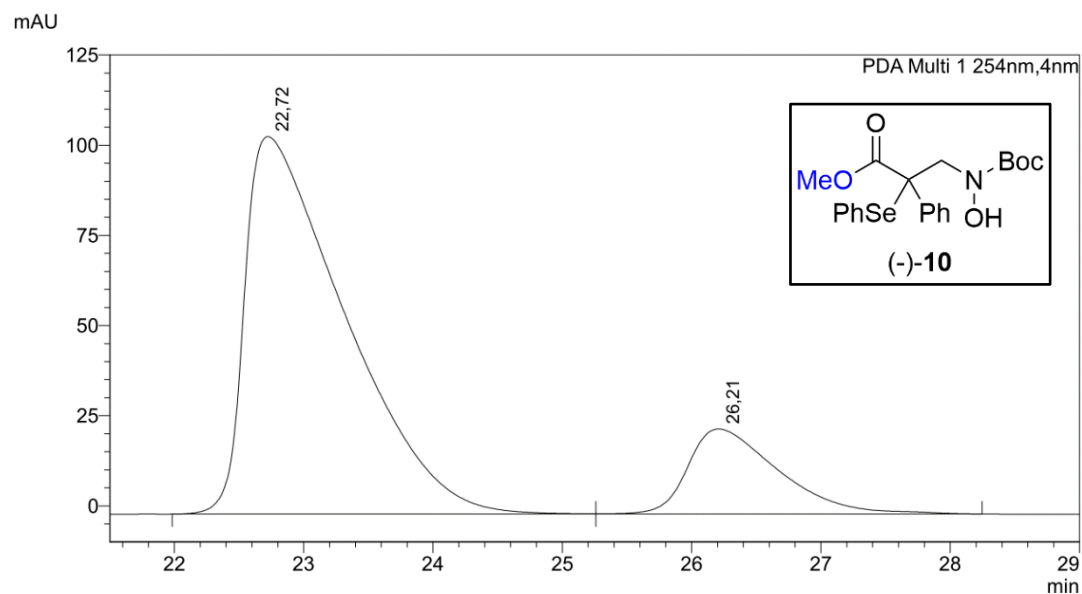

Peak Table

PDA Ch1 254nm

| Peak# | Ret. Time | Area    | Area%  |
|-------|-----------|---------|--------|
| 1     | 22,72     | 5628121 | 83,07  |
| 2     | 26,21     | 1147292 | 16,93  |
| Total |           | 6775414 | 100,00 |

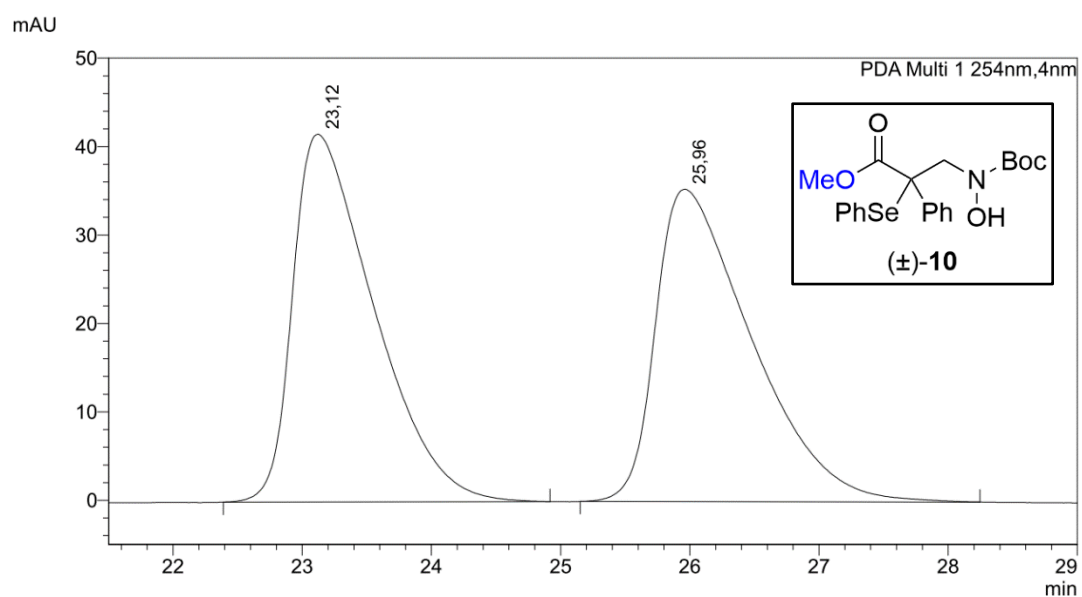

Peak Table

PDA Ch1 254nm

| Peak# | Ret. Time | Area    | Area%  |
|-------|-----------|---------|--------|
| 1     | 23,12     | 1816104 | 49,96  |
| 2     | 25,96     | 1818670 | 50,04  |
| Total |           | 3634774 | 100,00 |

## 11. HRMS Data

**HRMS spectrum of 3a** (ESI-QTOF, MeOH)  $m/z$ :  $[M+H]^+$  calculated for  $C_{23}H_{17}NO_2Se$ , 408.0498; found, 408.0500.

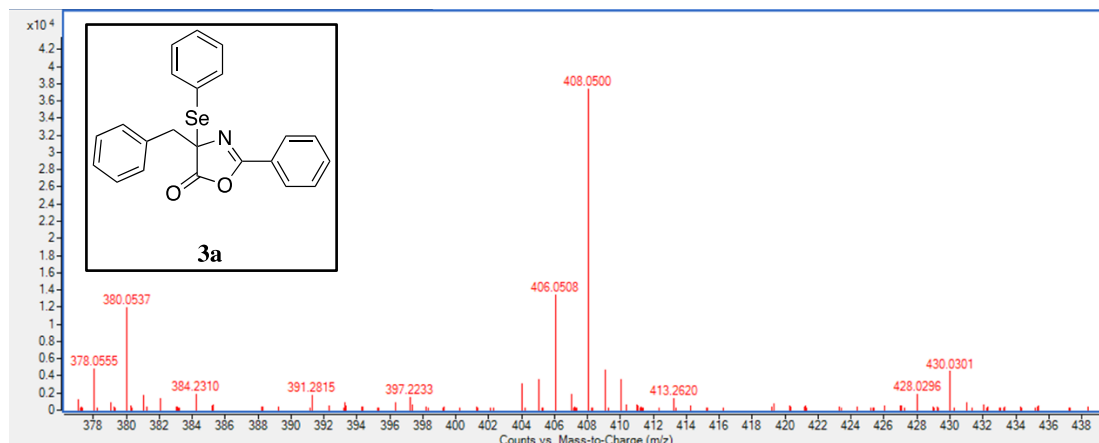

**HRMS spectrum of 3c** (ESI-QTOF, MeOH)  $m/z$ :  $[M+H]^+$  calculated for  $C_{16}H_{14}NO_2Se$ , 332.0185; found, 332.0187.

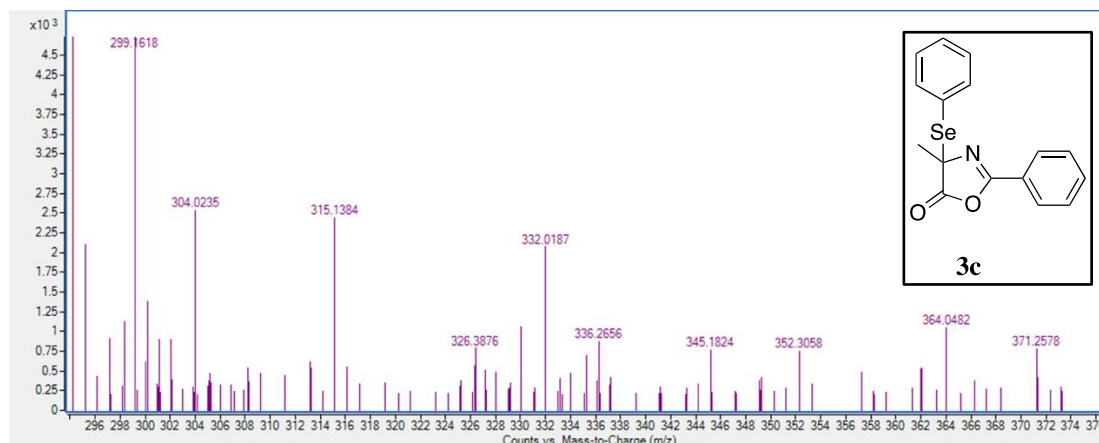

**HRMS spectrum of 3d** (ESI-QTOF, MeOH)  $m/z$ :  $[M+H]^+$  calculated for  $C_{18}H_{18}NO_2Se$ , 360.0498; found, 360.0501.

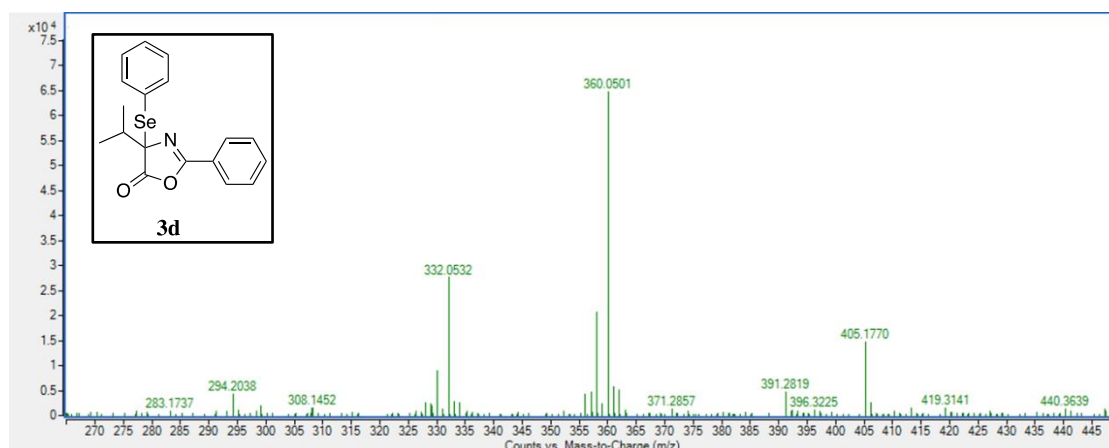

**HRMS spectrum of 3e** (ESI-QTOF, MeOH)  $m/z$ :  $[M+H]^+$  calculated for  $C_{19}H_{20}NO_2Se$ , 374.0654; found, 374.0657.

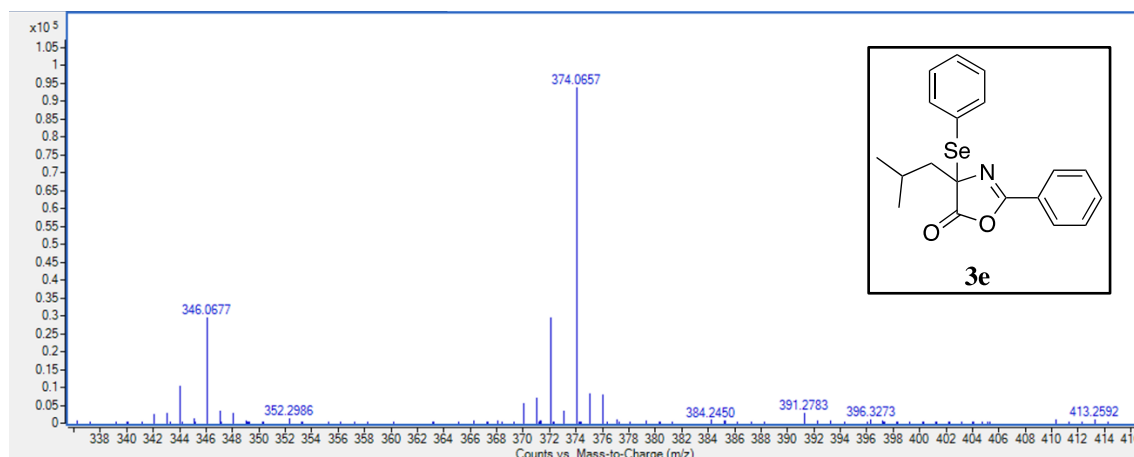

**HRMS spectrum of 3f** (ESI-QTOF, MeOH)  $m/z$ :  $[M+H]^+$  calculated for  $C_{22}H_{24}NO_2Se$ , 414.0967; found, 414.0965.

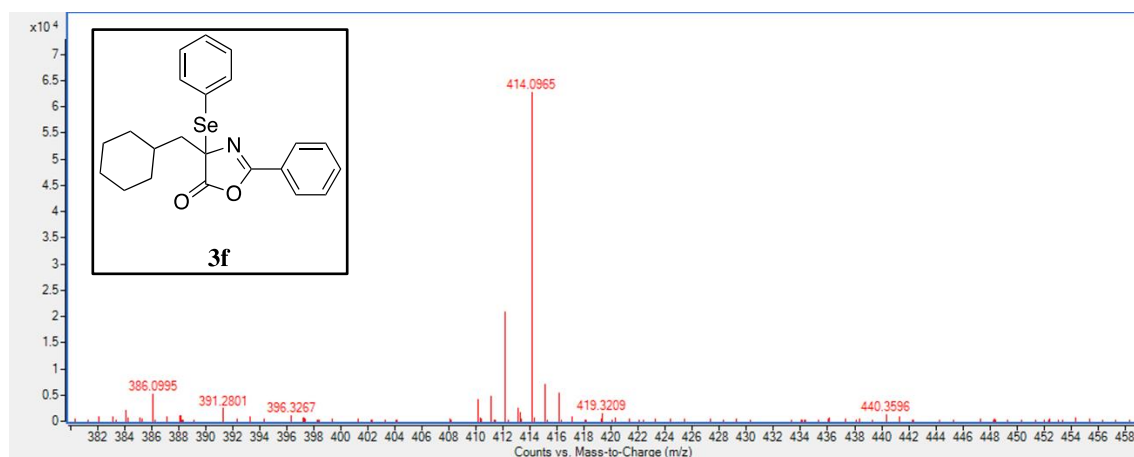

**HRMS spectrum of 3g** (ESI-QTOF, MeOH)  $m/z$ :  $[M+H]^+$  calculated for  $C_{18}H_{18}NO_2SSe$ , 392.0218; found, 392.0219.

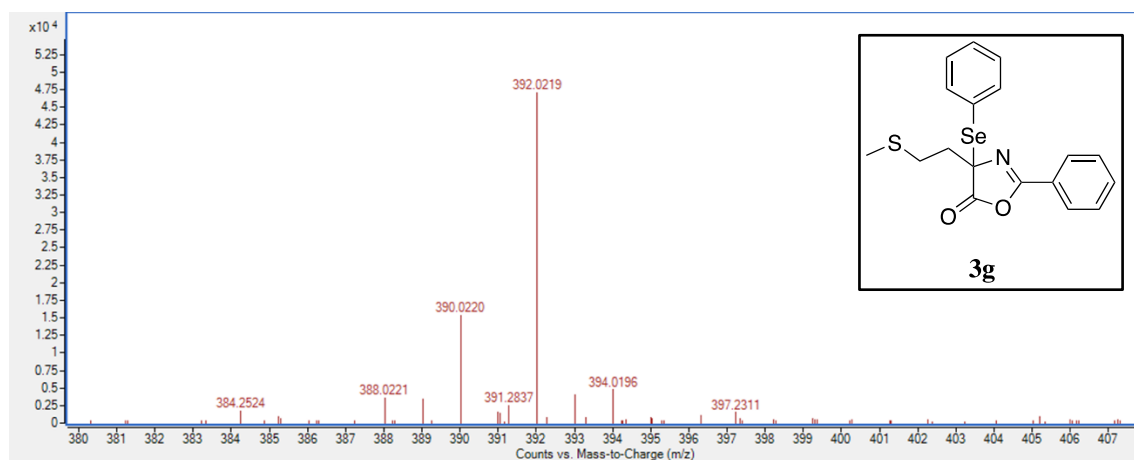

**HRMS spectrum of 3h** (ESI-QTOF, MeOH)  $m/z$ :  $[M+H]^+$  calculated for  $C_{22}H_{17}ClNO_2Se$ , 442.0108; found, 442.0106.

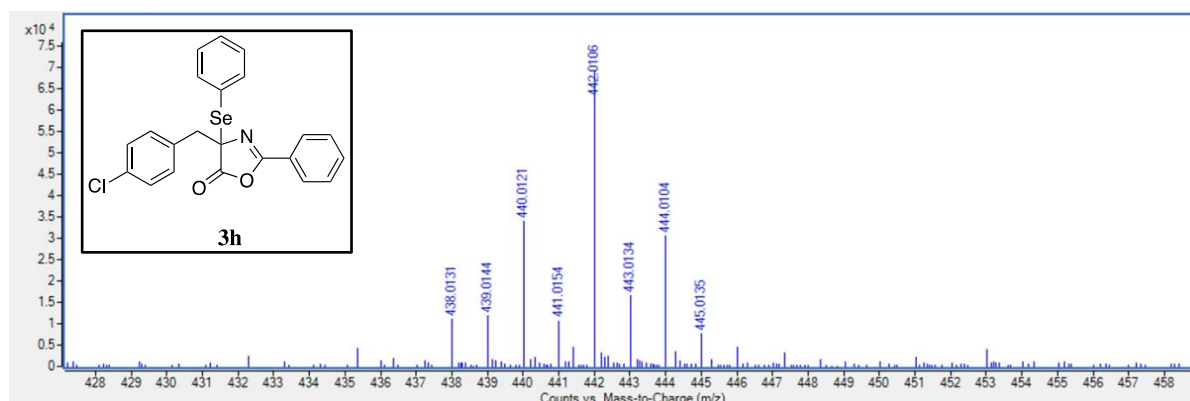

**HRMS spectrum of 3i** (ESI-QTOF, MeOH)  $m/z$ :  $[M+H]^+$  calculated for  $C_{22}H_{17}N_2O_4Se$ , 453.0348; found, 453.0352.

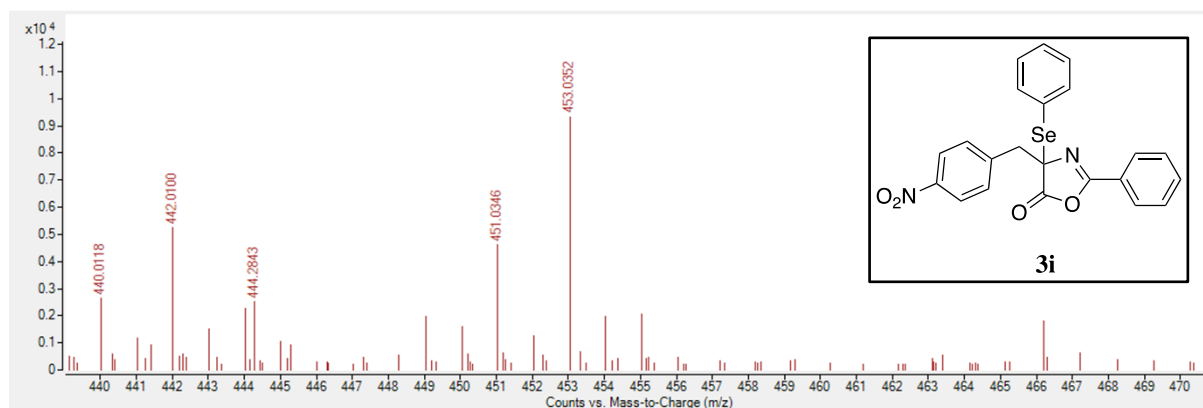

**HRMS spectrum of 3j** (ESI-QTOF, MeOH)  $m/z$ :  $[M+H]^+$  calculated for  $C_{23}H_{17}F_3NO_2Se$ , 476.0371; found, 476.0377.

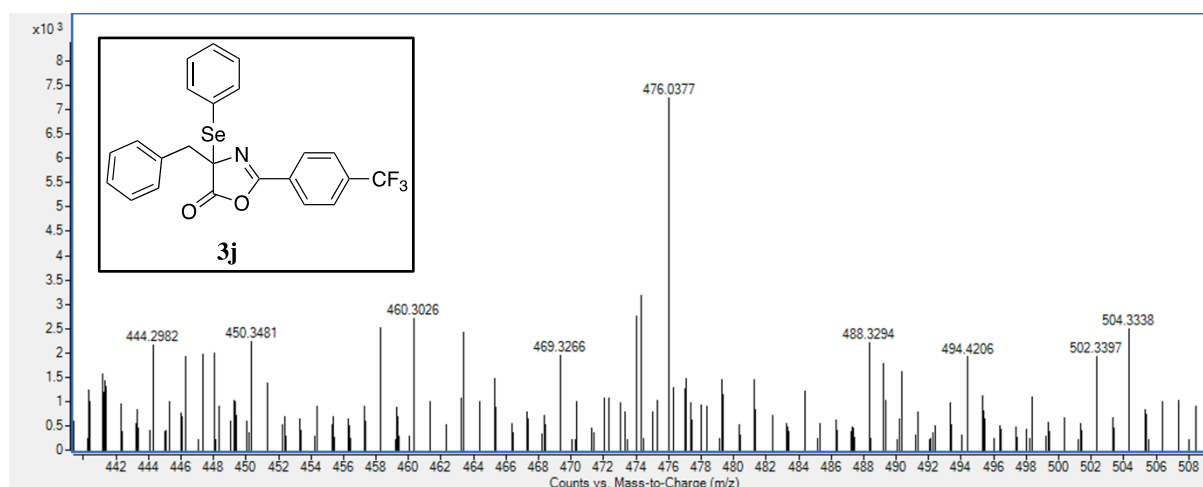

**HRMS spectrum of 3k** (ESI-QTOF, MeOH)  $m/z$ :  $[M+H]^+$  calculated for  $C_{22}H_{17}N_2O_4Se$ , 453.0348; found, 453.0343.

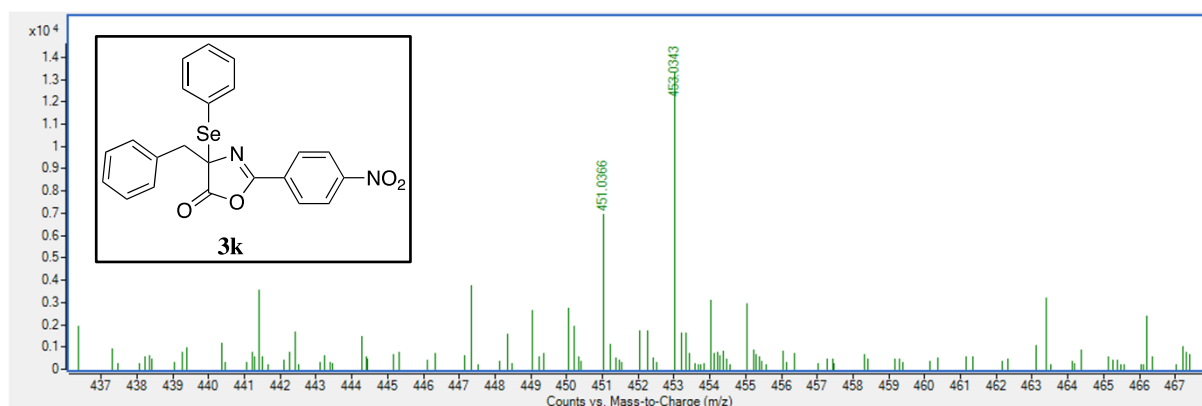

**HRMS spectrum of 3l** (ESI-QTOF, MeOH)  $m/z$ :  $[M+H]^+$  calculated for  $C_{23}H_{20}NO_3Se$ , 438.0603; found, 438.0605.

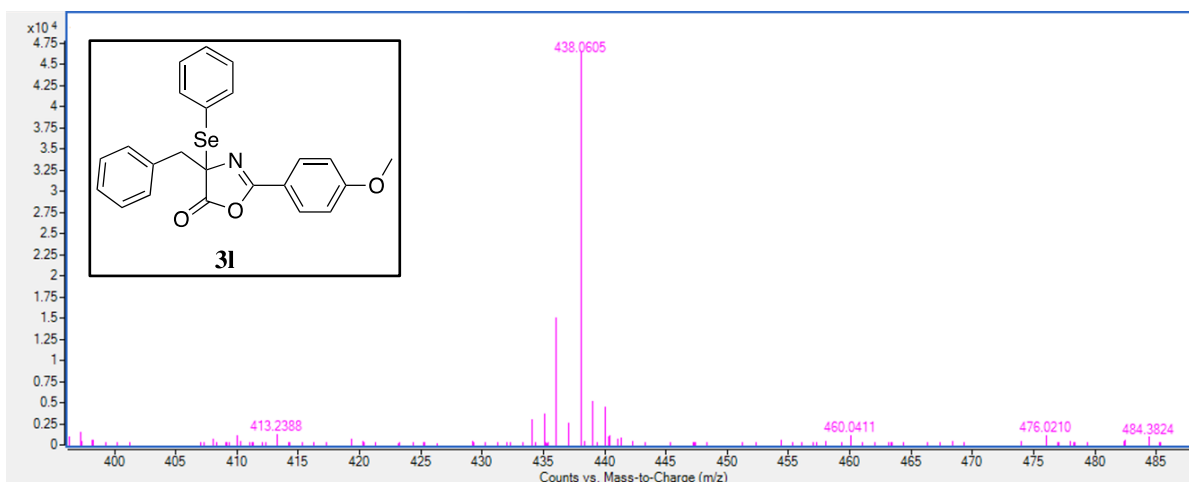

**HRMS spectrum of 3m** (ESI-QTOF, MeOH)  $m/z$ :  $[M+H]^+$  calculated for  $C_{22}H_{17}ClNO_2Se$ , 442.0108; found, 442.0108.

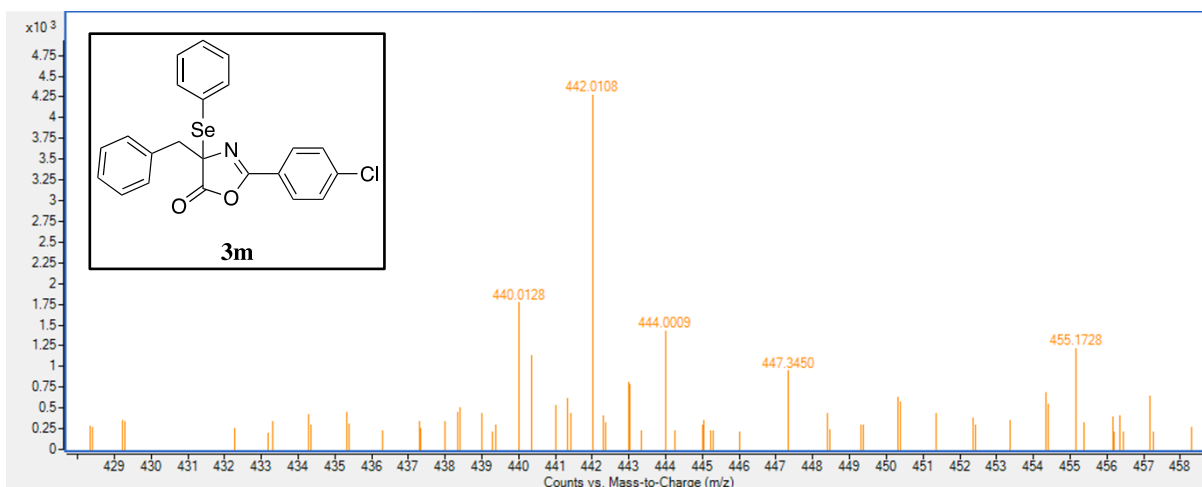

**HRMS spectrum of 3n** (ESI-QTOF, MeOH)  $m/z$ :  $[M+H]^+$  calculated for  $C_{26}H_{20}NO_2Se$ , 458.0654; found, 458.0649.

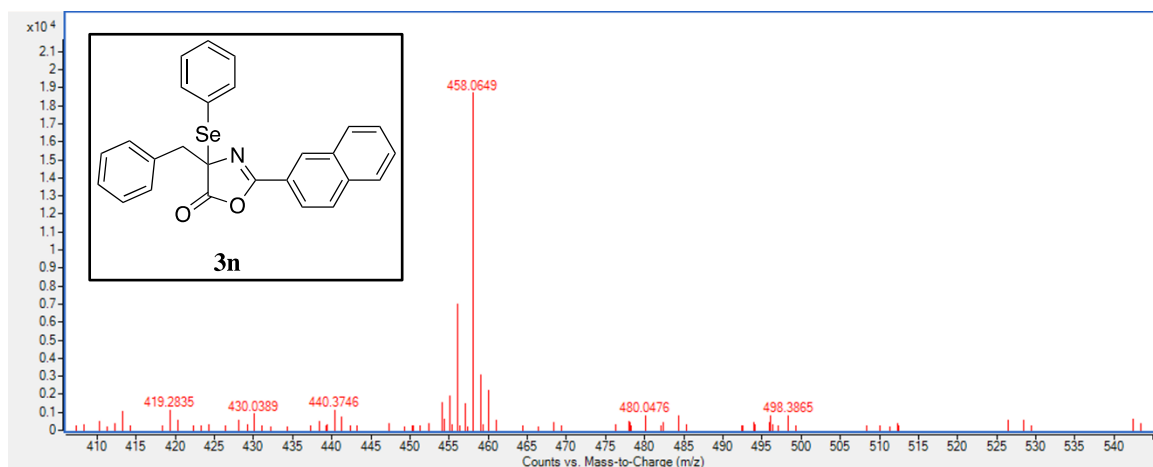

**HRMS spectrum of 3p** (ESI-QTOF, MeOH)  $m/z$ :  $[M+H]^+$  calculated for  $C_{22}H_{24}NO_2Se$ , 414.0967; found, 414.0963.

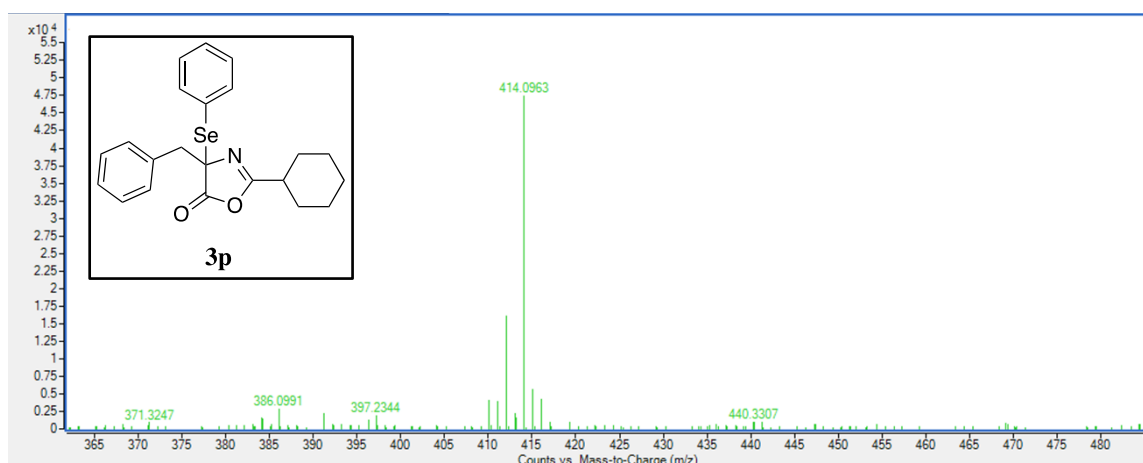

**HRMS spectrum of 3q** (ESI-QTOF, MeOH)  $m/z$ :  $[M+H]^+$  calculated for  $C_{23}H_{19}ClNO_3Se$ , 472.0213; found, 472.0205.

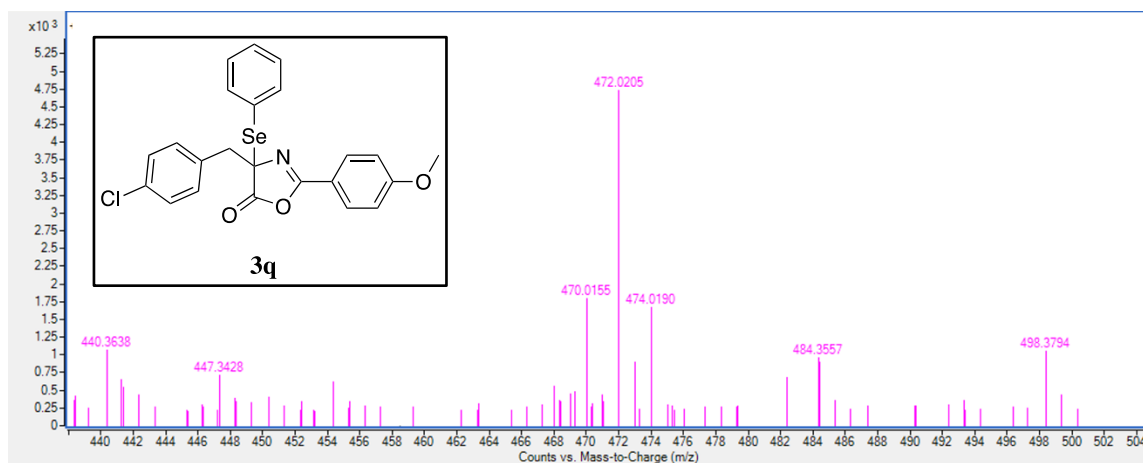

**HRMS spectrum of 3r** (ESI-QTOF, MeOH)  $m/z$ :  $[M+H]^+$  calculated for  $C_{23}H_{19}N_2O_5Se$ , 483.0454; found, 483.0462.

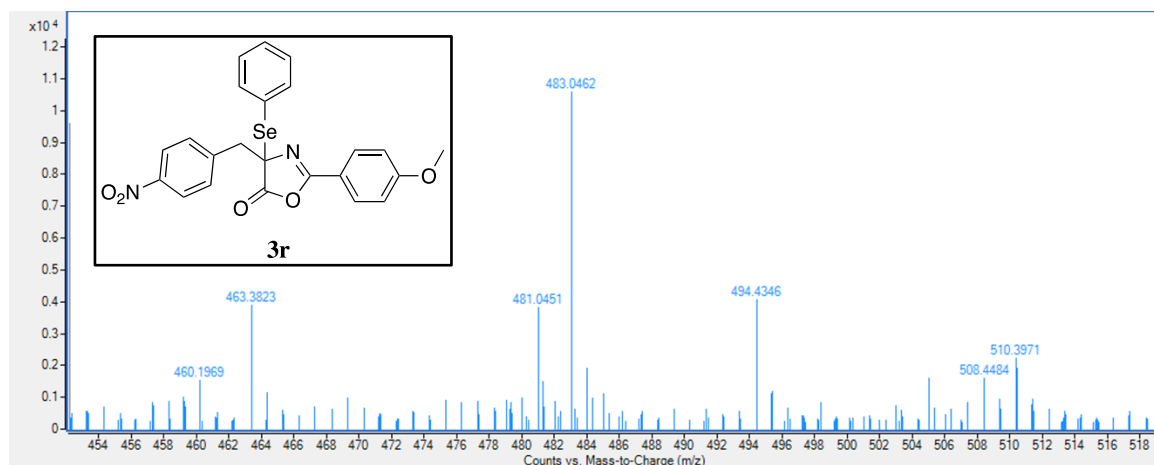

**HRMS spectrum of 3s** (ESI-QTOF, MeOH)  $m/z$ :  $[M+H]^+$  calculated for  $C_{17}H_{16}NO_3Se$ , 362.0290; found, 362.0294.

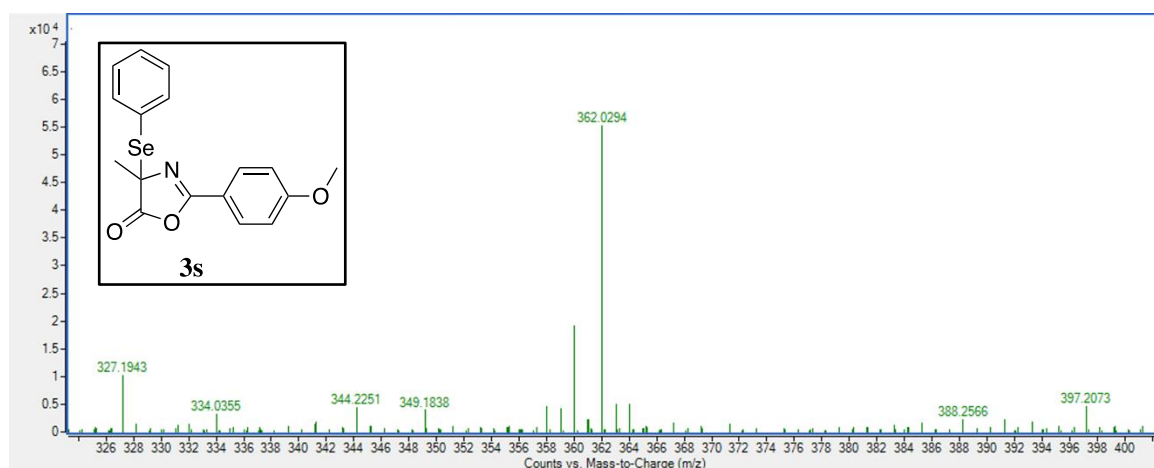

**HRMS spectrum of 3t** (ESI-QTOF, MeOH)  $m/z$ :  $[M+H]^+$  calculated for  $C_{20}H_{22}NO_3Se$ , 404.0760; found, 404.0770.

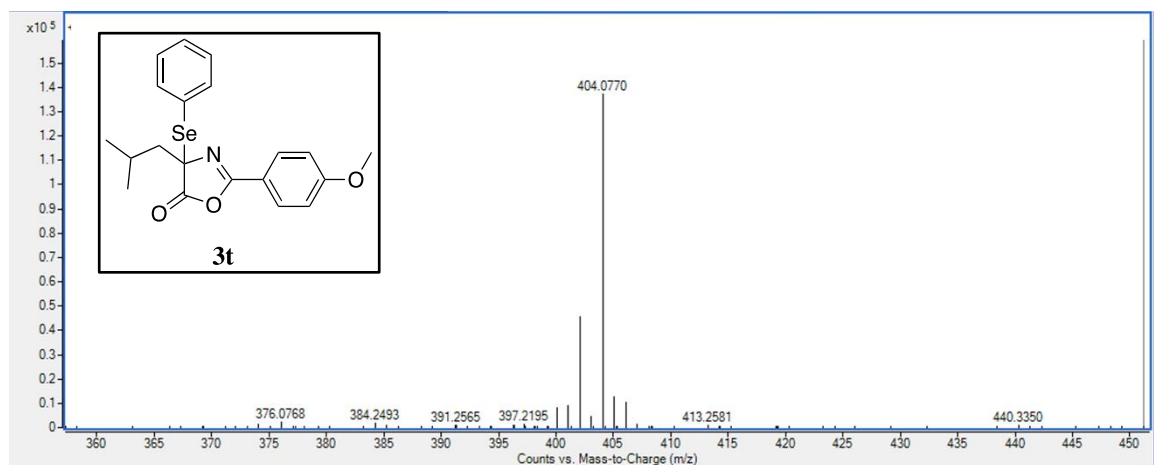

**HRMS spectrum of **3u**** (ESI-QTOF, MeOH)  $m/z$ :  $[M+H]^+$  calculated for  $C_{19}H_{20}NO_3SSe$ , 422.0324; found, 422.0324.

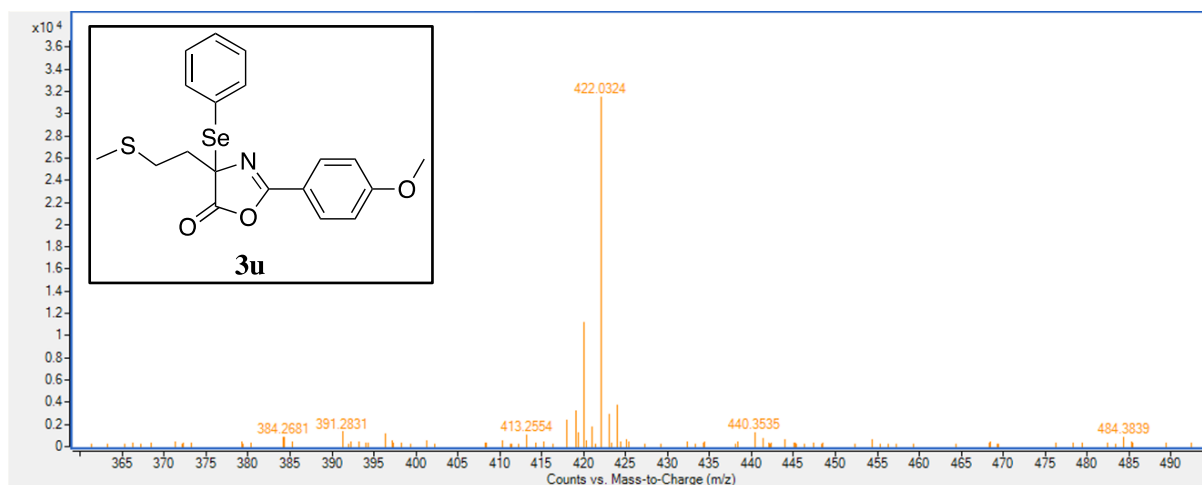

**HRMS spectrum of **3v**** (ESI-QTOF, MeOH)  $m/z$ :  $[M+H]^+$  calculated for  $C_{23}H_{20}NO_2Se$ , 422.0654; found, 422.0650.

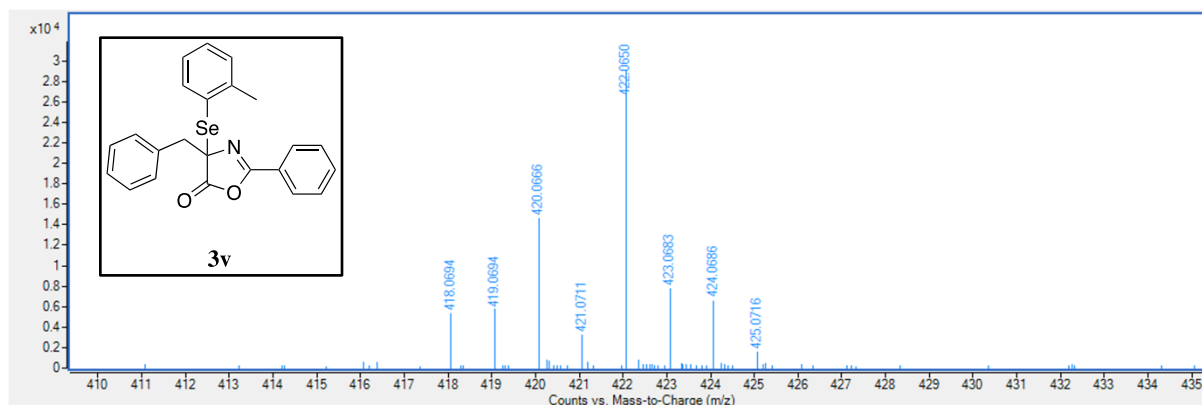

**HRMS spectrum of **3w**** (ESI-QTOF, MeOH)  $m/z$ :  $[M+H]^+$  calculated for  $C_{23}H_{20}NO_2Se$ , 422.0654; found, 422.0658.

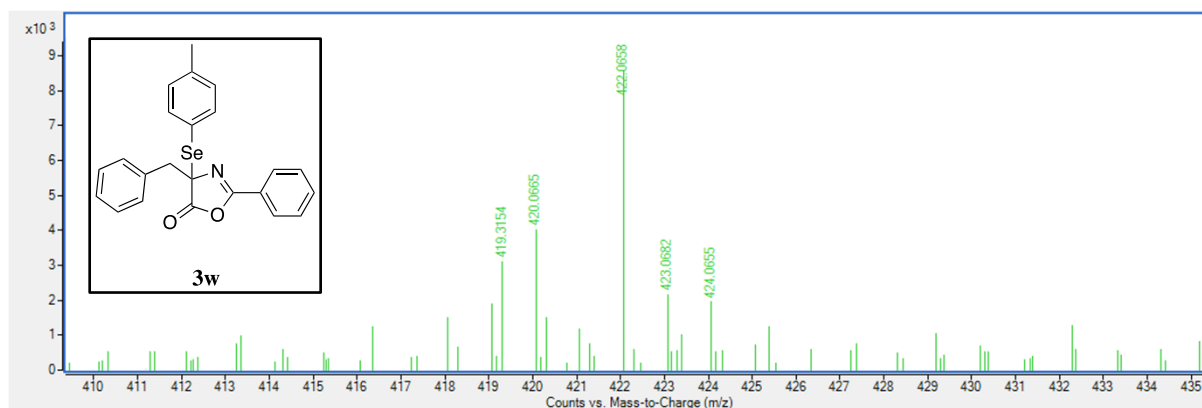

**HRMS spectrum of 3x** (ESI-QTOF, MeOH)  $m/z$ :  $[M+H]^+$  calculated for  $C_{23}H_{20}NO_2Se$ , 422.0654; found, 422.0652.

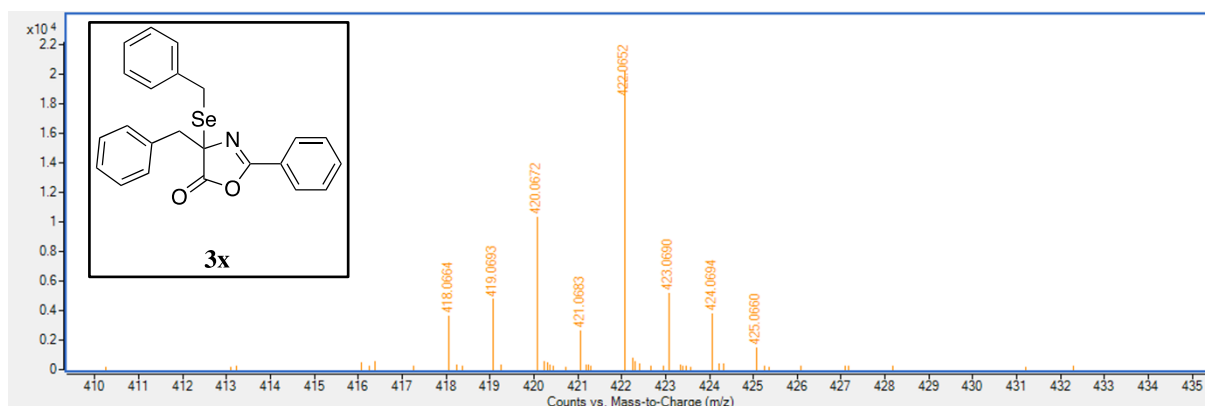

**HRMS spectrum of 4a** (ESI-QTOF, MeOH)  $m/z$ :  $[M+NH_4]^+$  calculated for  $C_{20}H_{25}N_2O_4Se^+$ , 437.0974; found, 437.0973.

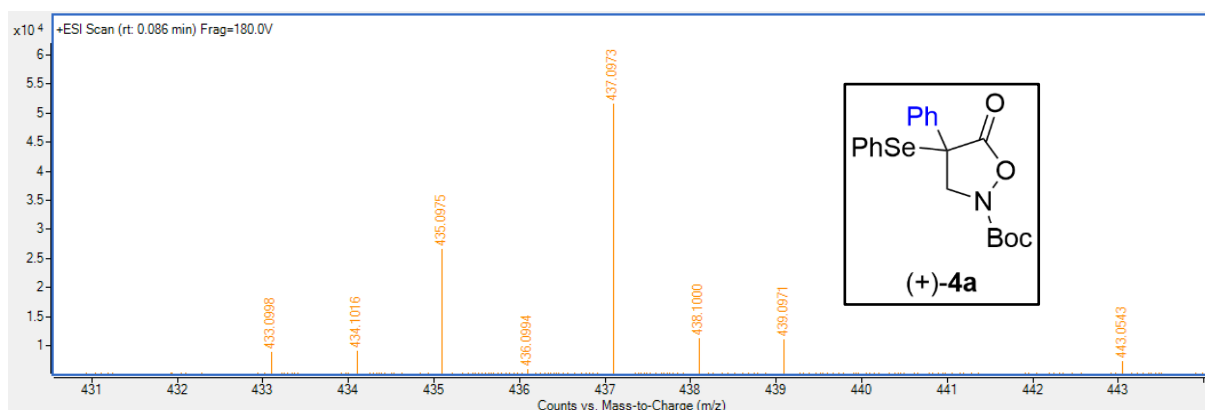

**HRMS spectrum of 4b** (ESI-QTOF, MeOH)  $m/z$ :  $[M+NH_4]^+$  calculated for  $C_{24}H_{27}N_2O_4Se^+$ , 487.1131; found, 487.1129.

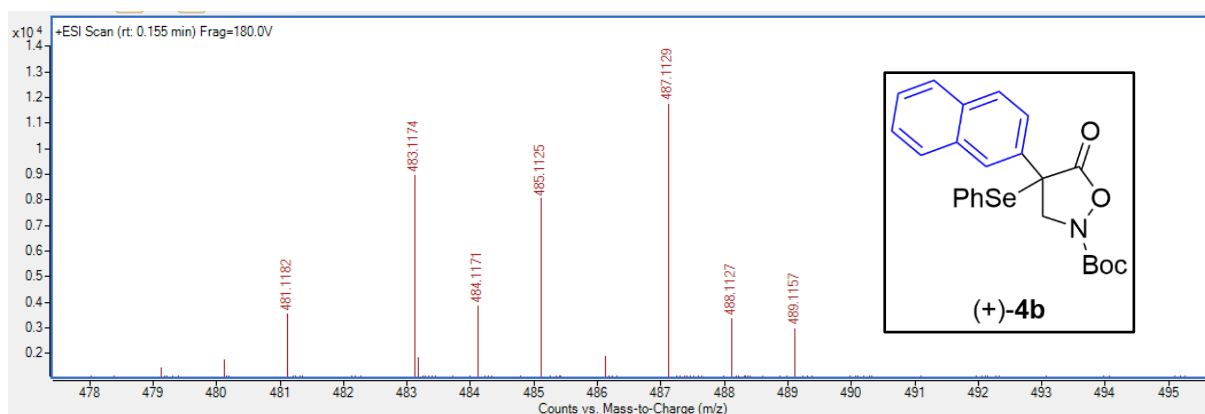

**HRMS spectrum of 4c** (ESI-QTOF, MeOH)  $m/z$ :  $[M+NH_4]^+$  calculated for  $C_{18}H_{23}N_2O_4S^{+}$ , 443.0538; found, 443.0538.

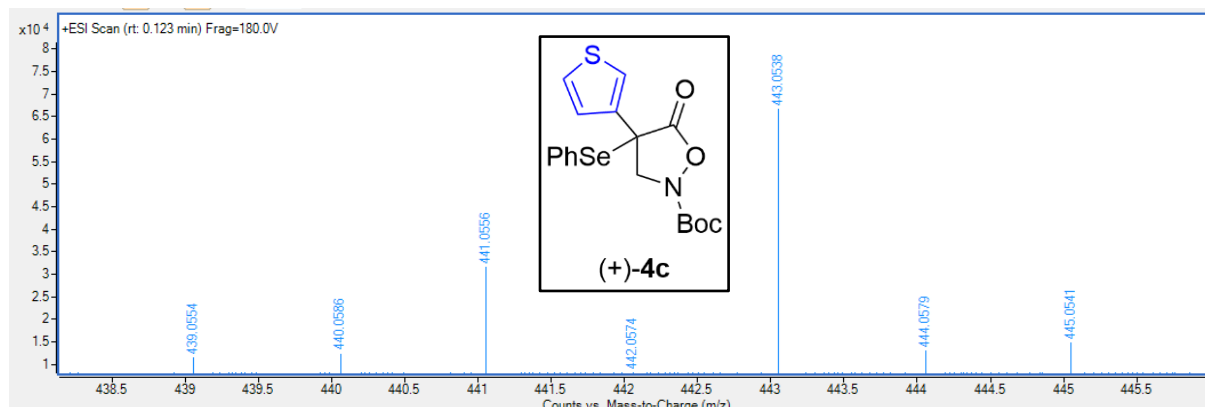

**HRMS spectrum of 4d** (ESI-QTOF, MeOH)  $m/z$ :  $[M+NH_4]^+$  calculated for  $C_{20}H_{24}ClN_2O_4Se^{+}$ , 471.0584; found, 471.0582.

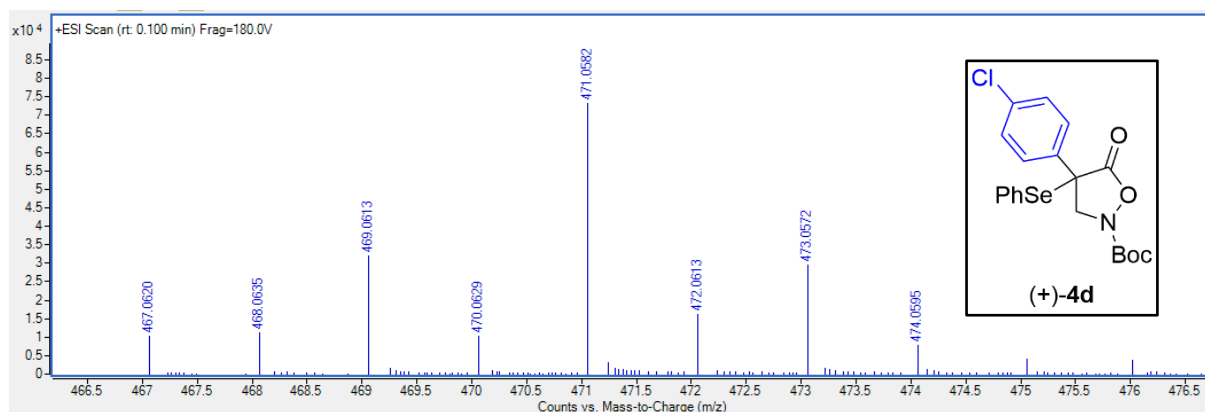

**HRMS spectrum of 4e** (ESI-QTOF, MeOH)  $m/z$ :  $[M+NH_4]^+$  calculated for  $C_{20}H_{24}BrN_2O_4Se^{+}$ , 515.0079; found, 515.0079.

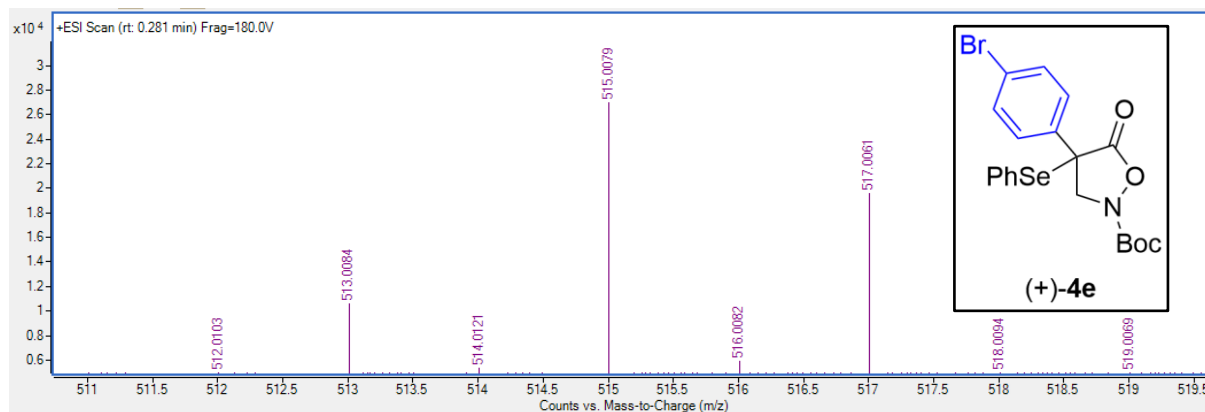

**HRMS spectrum of 4f** (ESI-QTOF, MeOH)  $m/z$ :  $[M+NH_4]^+$  calculated for  $C_{20}H_{24}FN_2O_4Se^+$ , 455.0880; found, 455.0881.

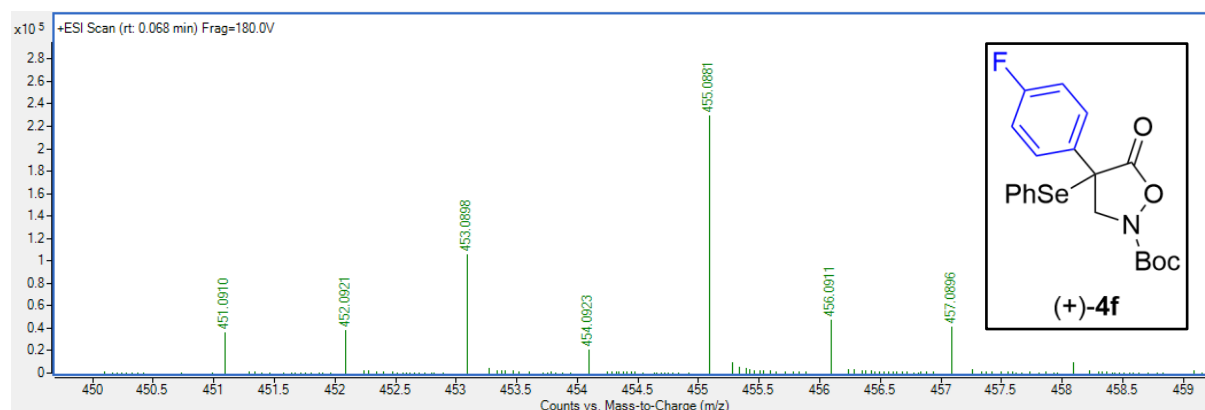

**HRMS spectrum of 4g** (ESI-QTOF, MeOH)  $m/z$ :  $[M+NH_4]^+$  calculated for  $C_{20}H_{23}Cl_2N_2O_4Se^+$ , 505.0195; found, 505.0195.

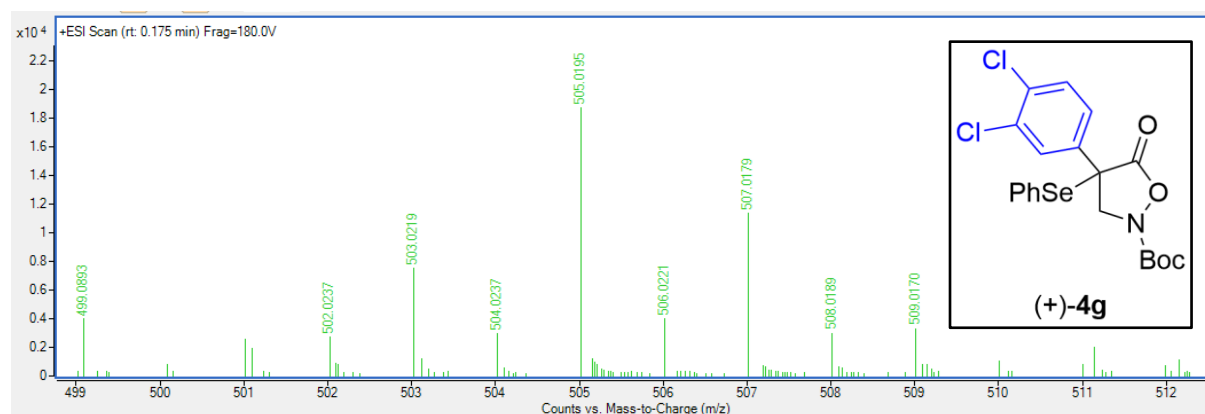

**HRMS spectrum of 4i** (ESI-QTOF, MeOH)  $m/z$ :  $[M+NH_4]^+$  calculated for  $C_{21}H_{27}N_2O_4Se^+$ , 451.1131; found, 451.1128.

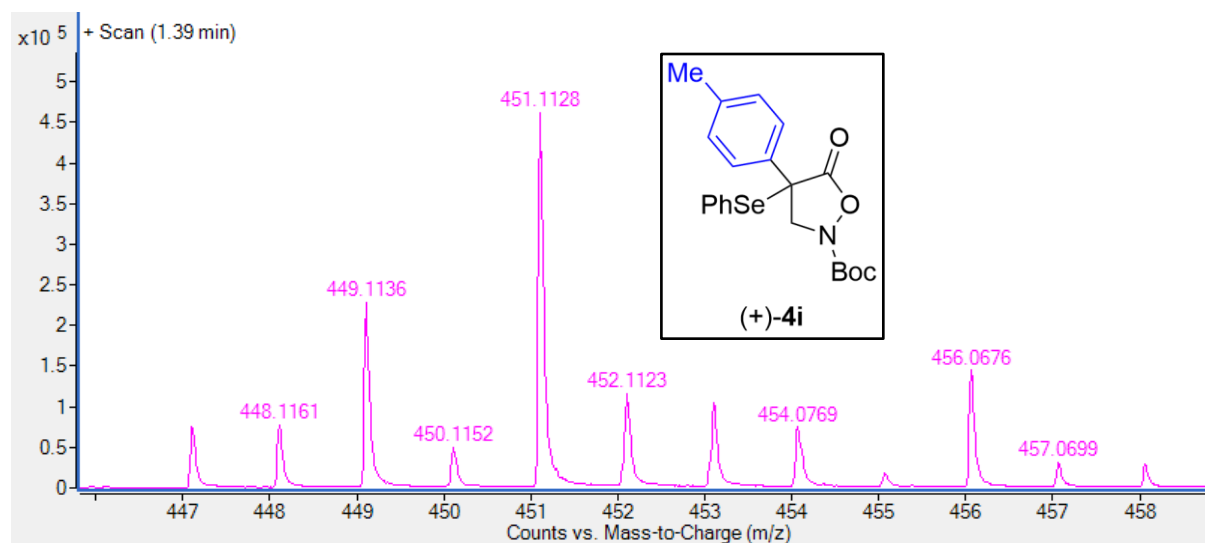

**HRMS spectrum of 4j** (ESI-QTOF, MeOH)  $m/z$ :  $[M+NH_4]^+$  calculated for  $C_{21}H_{27}N_2O_4Se^+$ , 451.1131; found, 451.1125.

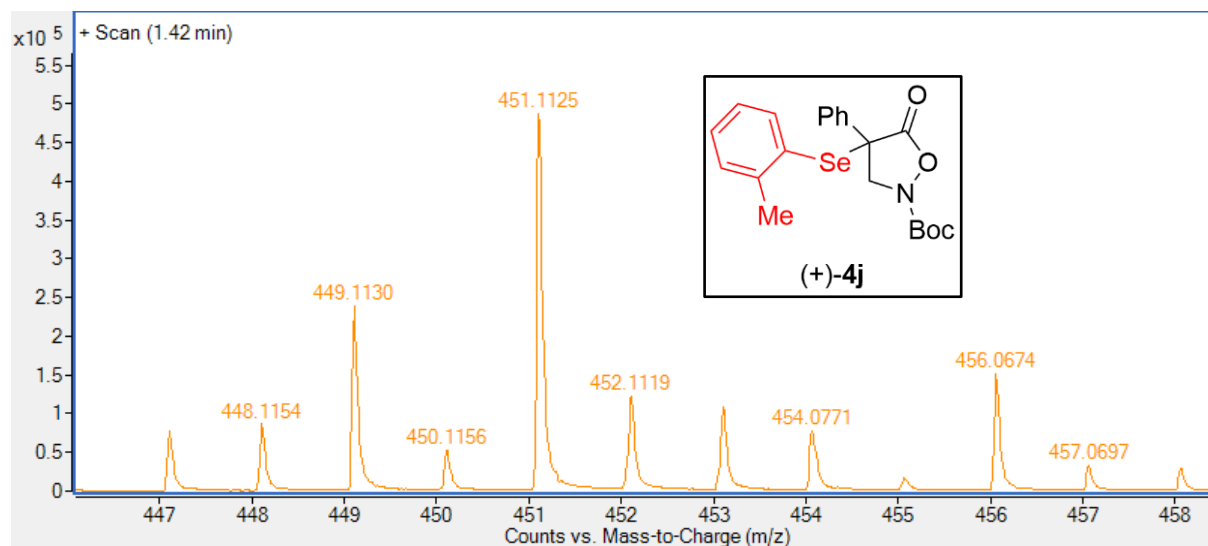

**HRMS spectrum of 4k** (ESI-QTOF, MeOH)  $m/z$ :  $[M+NH_4]^+$  calculated for  $C_{21}H_{27}N_2O_4Se^+$ , 451.1131; found, 451.1129.

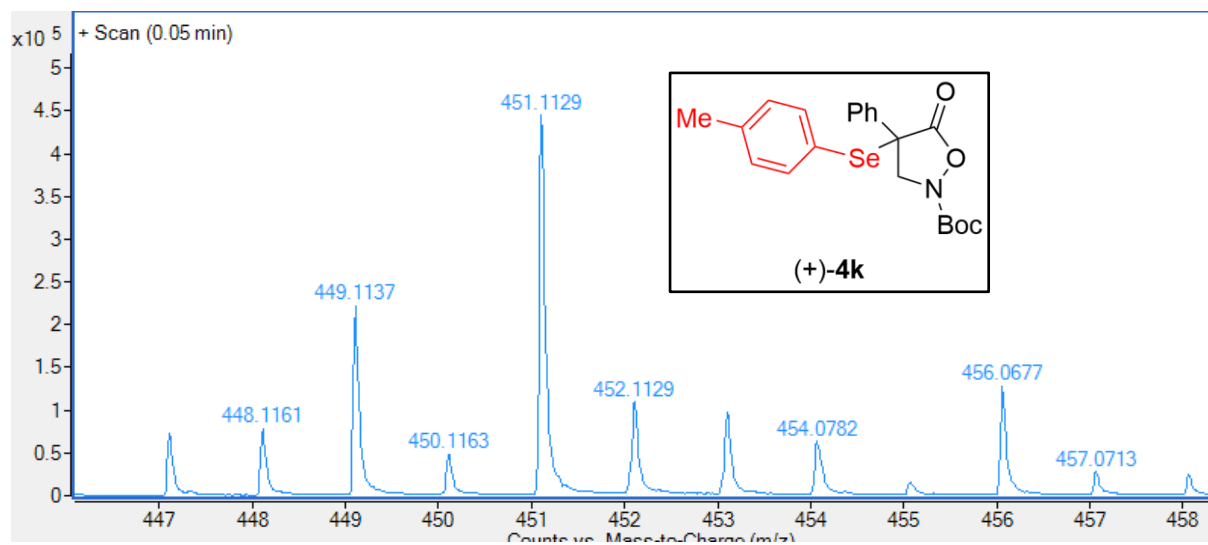

**HRMS spectrum of 4l** (ESI-QTOF, MeOH)  $m/z$ :  $[M+NH_4]^+$  calculated for  $C_{21}H_{27}N_2O_4Se^+$ , 451.1131; found, 451.1133.

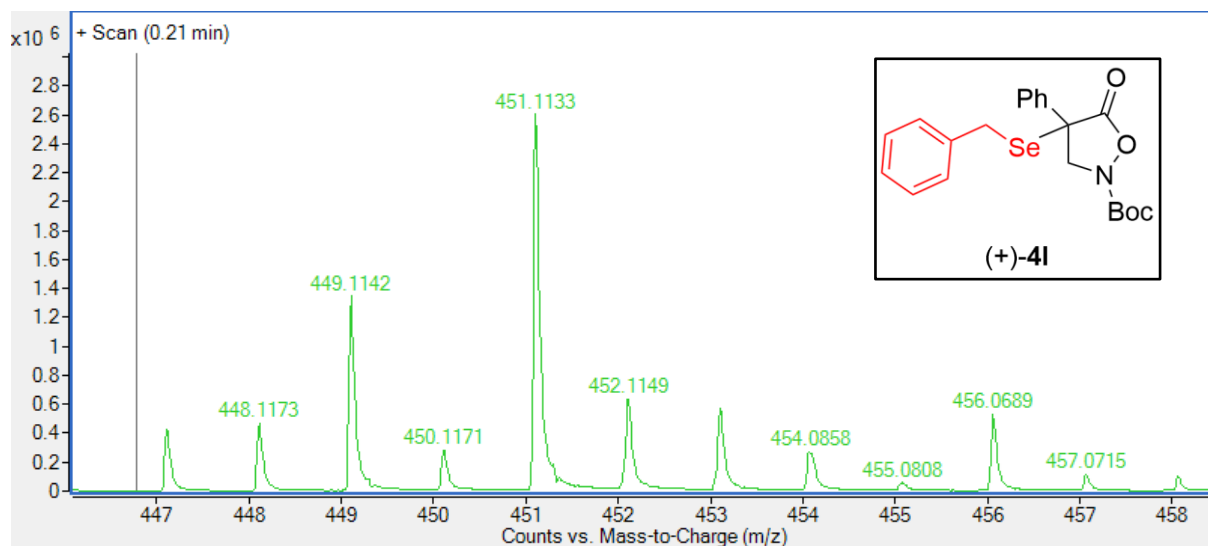

**HRMS spectrum of 6** (ESI-QTOF, MeOH)  $m/z$ :  $[M+Na]^+$  calculated for  $C_{18}H_{19}NO_4Na$ , 336.1206; found, 336.1207.

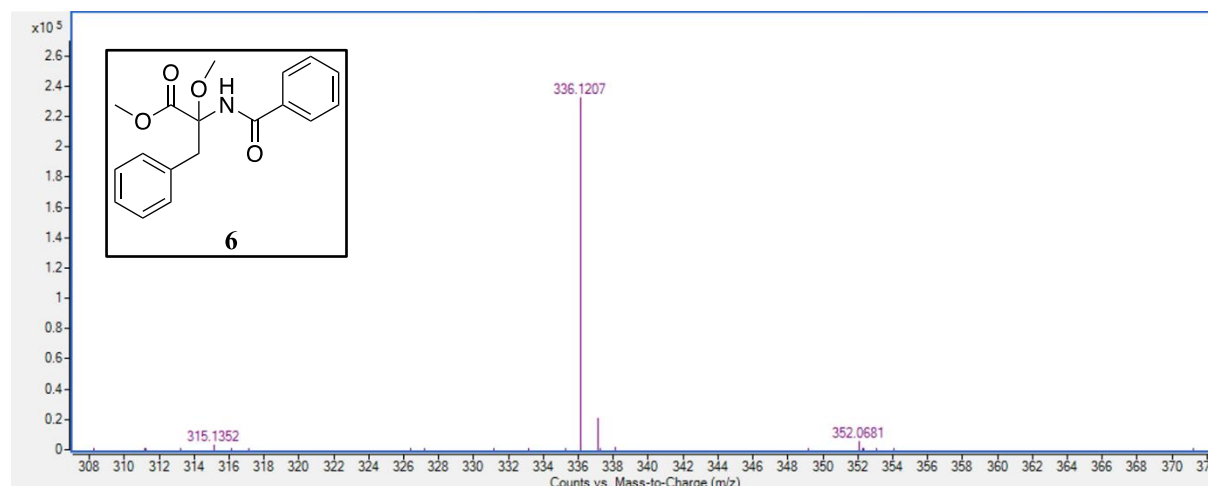

**HRMS spectrum of 8** (ESI-QTOF, MeOH)  $m/z$ :  $[M+H]^+$  calculated for  $C_{23}H_{27}N_2O_4Se$ , 475.1131; found, 475.1126.

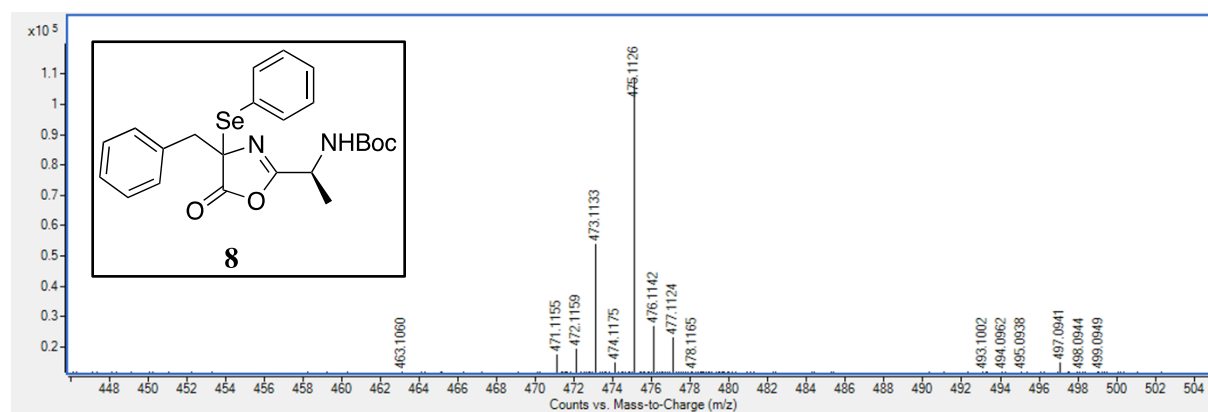

**HRMS spectrum of 9a** (ESI-QTOF, MeOH)  $m/z$ :  $[M+Na]^+$  calculated for  $C_{27}H_{29}ClN_2NaO_4Se^+$ , 583.0873; found, 583.0875.

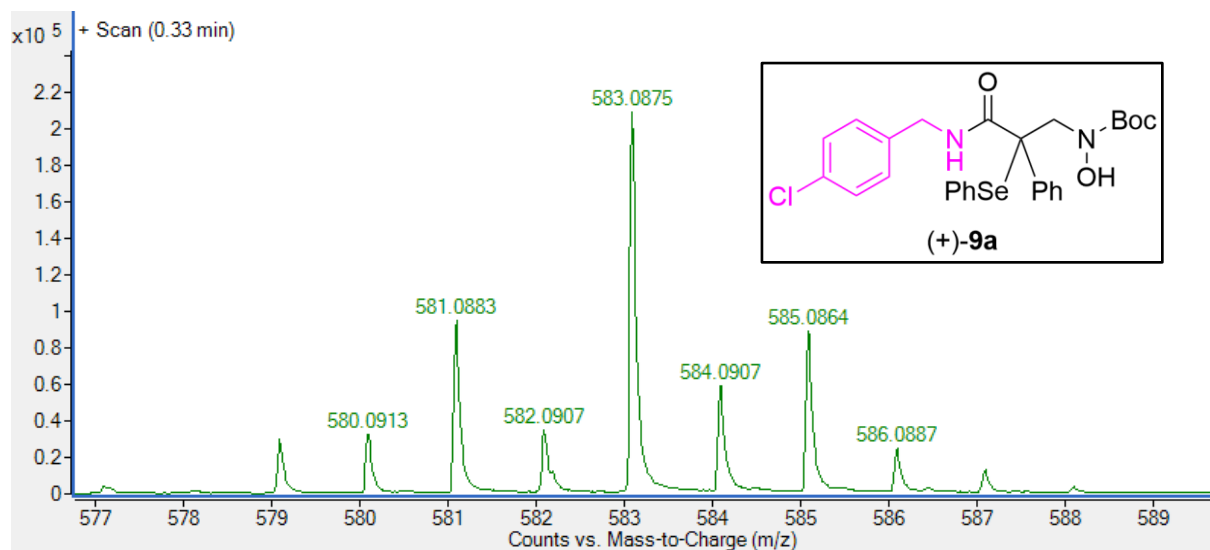

**HRMS spectrum of 9b** (ESI-QTOF, MeOH)  $m/z$ :  $[M+Na]^+$  calculated for  $C_{28}H_{32}N_2NaO_5Se^+$ , 579.1369; found, 579.1364.

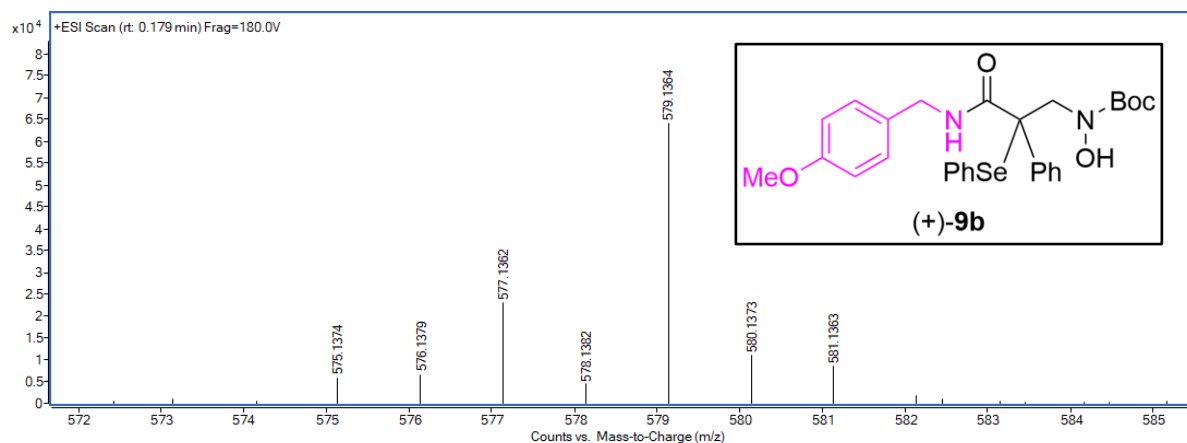

**HRMS spectrum of 10** (ESI-QTOF, MeOH)  $m/z$ :  $[M+Na]^+$  calculated for  $C_{21}H_{25}NNaO_5Se^+$ , 474.0790; found, 474.0795.

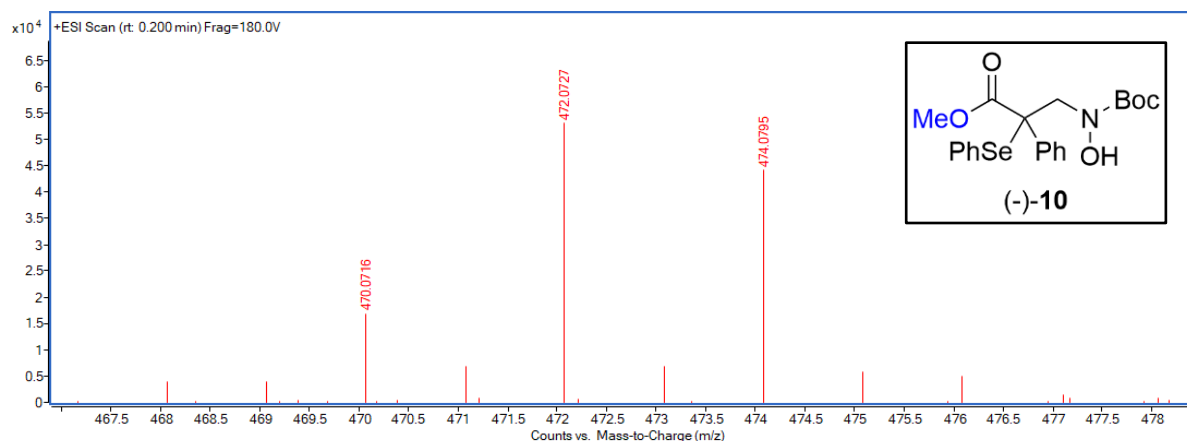

**HRMS spectrum of 11** (ESI-QTOF, MeOH)  $m/z$ :  $[M+Na]^+$  calculated for  $C_{14}H_{15}NNaO_4^+$ , 284.0893; found, 284.0893.

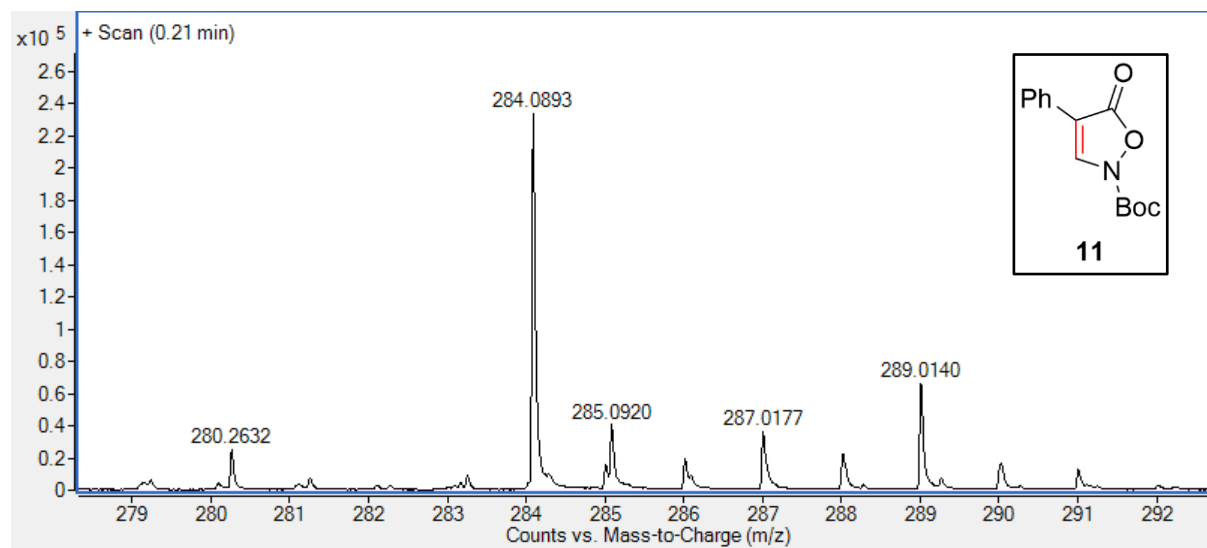

Supplement: OB-020-D1OB02235K-s001 [file OB-020-D1OB02235K-s001.pdf]
